# Supplementary material for: Electrophile induced branching cascade: a powerful approach to access various molecular scaffolds and their exploration as novel anti-mycobacterial agents
Source: Royal Society of Chemistry journal article supplement (doi:10.1039/c3cc45289a), 2013-01-01

# Electrophile Induced Branching Cascade: A Powerful Approach to Access Various Molecular Scaffolds and Their Exploration as Novel Anti-mycobacterial Agent

*Nitin T. Patil,\* Ashok Konala, Sudha Sravanti, Ashita Singh, Ramesh Ummanni and Balasubramanian Sridhar*

## Contents

|                                                                                                        |    |
|--------------------------------------------------------------------------------------------------------|----|
| 1. General Introduction.....                                                                           | 1  |
| 2. Synthesis of Scaffold Building Agents (SBAs) .....                                                  | 2  |
| 3. Polyheterocyclic Scaffolds Accessed Through EIBC– Literature Known Synthesis and Applications ..... | 4  |
| 4. General Procedures and Characterization Data of Compounds .....                                     | 6  |
| 5. Diversification of Products.....                                                                    | 23 |
| 6. Undesired Products Obtained During Optimization Studies and Characterization Data:.....             | 27 |
| 7. Enantioselective Experiment and HPLC Chromatograms .....                                            | 29 |
| 8. Anti mycobacterial activity .....                                                                   | 32 |
| 9. X- ray Crystallography Data: .....                                                                  | 35 |
| 10. <sup>1</sup> H NMR and <sup>13</sup> C NMR Spectra of Compounds .....                              | 38 |

## 1. General Introduction

All cross coupling reactions were carried out in oven or flame dried vials with magnetic stirring under nitrogen atmosphere. Dried solvents and liquid reagents were transferred by oven-dried syringes or hypodermic syringe cooled to ambient temperature in a desiccators. All experiments were monitored by analytical thin layer chromatography (TLC). TLC was performed on pre-coated silica gel plates. After elution, plate was visualized under UV illumination at 254 nm for UV active materials. Further visualization was achieved by staining  $\text{KMnO}_4$  and charring on a hot plate. Solvents were removed in vacuo and heated with a water bath at 35 °C. Silica gel finer than 200 mesh was used for flash column chromatography. Columns were packed as slurry of silica gel in hexane and equilibrated with the appropriate solvent mixture prior to use. The compounds were loaded neat or as a concentrated solution using the appropriate solvent system. The elution was assisted by applying pressure with an air pump.

Melting points are uncorrected. IR spectra were recorded as neat liquids or KBr pellets and absorptions are reported in  $\text{cm}^{-1}$ .  $^1\text{H}$  NMR spectra were recorded on 300 and 500, 600 MHz spectrometers in appropriate solvents using TMS as internal standard or the solvent signals as secondary standards and the chemical shifts are shown in  $\delta$  scales. Multiplicities of  $^1\text{H}$  NMR signals are designated as s (singlet), bs (broad singlet), d (doublet), dd (doublet of doublet), t (triplet), m (multiplet)... etc.  $^{13}\text{C}$  NMR spectra were recorded on 75, 125, 150 MHz spectrometers. High-resolution mass spectra were obtained by using ESI-QTOF mass spectrometry.

## 2. Synthesis of Scaffold Building Agents (SBAs)

The scaffold building agents **1**, **3**, **4** and **9** were commercially available while others prepared by literature known procedures. The details are given below in tabular form.

| SBA No        | Structures                                                                          | References                                                         |
|---------------|-------------------------------------------------------------------------------------|--------------------------------------------------------------------|
| <b>1</b>      | 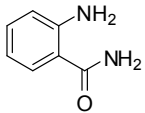   | Commercially available                                             |
| <b>1(I)</b>   |    | <i>Org. Biomol. Chem.</i> , <b>2003</b> , <i>11</i> , 383-392      |
| <b>1(II)</b>  |    | <i>J. Org. Chem.</i> , <b>2010</b> , <i>75</i> , 1277-1280         |
| <b>1(III)</b> |   | <i>J. Indian Chem. Soc.</i> , <b>1980</b> , <i>57</i> , 887-889    |
| <b>1(VI)</b>  |  | <i>J. Indian Chem. Soc.</i> , <b>1980</b> , <i>57</i> , 887-889    |
| <b>2</b>      |  | <i>Angew. Chem. Int. Ed.</i> , <b>2007</b> , <i>46</i> , 7247-7250 |
| <b>2(I)</b>   |  | <i>Angew. Chem. Int. Ed.</i> , <b>2007</b> , <i>46</i> , 7247-7250 |
| <b>3</b>      |  | Commercially available                                             |
| <b>4</b>      |  | Commercially available                                             |
| <b>5</b>      |  | <i>Eur. J. Med. Chem.</i> , <b>1998</b> , <i>33</i> , 181-188      |
| <b>6</b>      |  | <i>J. Med. Chem.</i> , <b>1967</b> , <i>10</i> , 334-336           |

|              |                                                                                     |                                                                   |
|--------------|-------------------------------------------------------------------------------------|-------------------------------------------------------------------|
| <b>7</b>     | 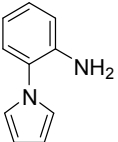   | <i>J. Org. Chem.</i> , <b>2004</b> , <i>69</i> , 5578-5587        |
| <b>7(I)</b>  |    | <i>J. Med. Chem.</i> , <b>1999</b> , <i>42</i> , 4362-4379        |
| <b>7(II)</b> |    | <i>J. Med. Chem.</i> , <b>2004</b> , <i>47</i> , 1997-2009        |
| <b>8</b>     |    | <i>Tetrahedron</i> , <b>1973</b> , <i>29</i> , 1429-1432          |
| <b>9</b>     |   | <i>J. Am. Chem. Soc.</i> , <b>2002</b> , <i>124</i> , 11684-11688 |
| <b>10</b>    |  | <i>Commercially available</i>                                     |
| <b>10(I)</b> |  | <i>J. Org. Chem.</i> , <b>2008</b> , <i>73</i> , 4252-4255        |
| <b>11</b>    |  | <i>Chem. Comm.</i> , <b>2010</b> , <i>46</i> , 448-450            |

### 3. Polyheterocyclic Scaffolds Accessed Through EIBC– Literature Known Synthesis and Applications

| Sl. No. | Scaffold                                                                            | Sub-structures                                                                      | Synthesis/Applications                                                     | References                                                                                             |
|---------|-------------------------------------------------------------------------------------|-------------------------------------------------------------------------------------|----------------------------------------------------------------------------|--------------------------------------------------------------------------------------------------------|
| 1       | 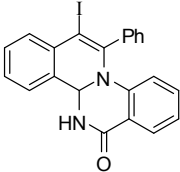   |    | Synthesis/TNF- $\alpha$ inhibition                                         | <i>Chem. Commun.</i> , <b>2011</b> , 47, 10263-10265                                                   |
|         |                                                                                     |    | Synthesis/Inhibition of Fc $\epsilon$ RI-mediated activation of mast Cells | <i>J. Med. Chem.</i> , <b>1998</b> , 41, 1050-1059                                                     |
| 2       |    |    | Synthesis/DNA binding agent with cytotoxic properties                      | <i>J. Med. Chem.</i> , <b>2005</b> , 48, 4504-4506<br><i>ChemBioChem.</i> , <b>2006</b> , 7, 1757-1763 |
|         |                                                                                     |   | Synthesis/Hypoglycemic agent                                               | US4097598 A1, <b>1978</b>                                                                              |
| 3       |  |  | Synthesis/Lipid peroxidation inhibitory activity                           | <i>Eur. J. Med. Chem.</i> , <b>1998</b> , 33, 181-187                                                  |
|         |                                                                                     |  | Synthesis                                                                  | <i>Ind. J. Chem.</i> , <b>1970</b> , 8, 126-129                                                        |
|         |                                                                                     |  | Used in an organic electronic device including OLED                        | WO200769847 A1, <b>2007</b>                                                                            |
| 4       |  |  | Synthesis/Positive allosteric modulators of AMPA receptors                 | <i>J. Med. Chem.</i> , <b>2007</b> , 50, 3153-3157                                                     |
|         |                                                                                     |  | Synthesis/Orally active potent cognitive enhancer                          | <i>J. Med. Chem.</i> , <b>2010</b> , 53, 1700-1711                                                     |

|   |                                                                                     |                                                                                     |                                                  |                                                                                                    |
|---|-------------------------------------------------------------------------------------|-------------------------------------------------------------------------------------|--------------------------------------------------|----------------------------------------------------------------------------------------------------|
|   |                                                                                     | 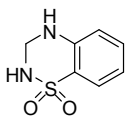   | Synthesis/Antihypertensive agent                 | <i>J. Med. Chem.</i> , <b>1963</b> , 6,122-127                                                     |
| 5 |    |    | Synthesis/Lipid peroxidation inhibitory activity | <i>Eur. J. Med. Chem.</i> , <b>1998</b> , 33, 181-188                                              |
| 6 |    |    | Synthesis                                        | <i>Tetrahedron Lett.</i> , <b>2012</b> , 53, 2643-2646                                             |
|   |                                                                                     |    | Inhibitor of cell multiplication                 | <i>J. Med. Chem.</i> , <b>1967</b> , 10, 334-336                                                   |
| 7 |   |   | Arginine vasopressin antagonists                 | <i>Bioorg. Med. Chem. Lett.</i> , <b>2003</b> , 13, 2195-2198                                      |
|   |                                                                                     |  | Hypotensive activity                             | <i>Pharmaceutical Chemistry Journal</i> , <b>1987</b> , 21, 619-624                                |
| 8 |  |  | Synthesis                                        | <i>Tetrahedron Lett.</i> , <b>2002</b> , 43, 3347-3350                                             |
|   |                                                                                     |  | Synthesis/Cataleptogenic activity                | <i>J. Org. Chem.</i> , <b>1994</b> , 59, 6777-6782<br><i>Ger. Offen.</i> , <b>1971</b> , 961, 2051 |
|   |                                                                                     |  | Synthesis/Melatonin receptor ligands             | <i>Org. Biomol. Chem.</i> , <b>2007</b> , 5, 2129-2137                                             |

|    |                                                                                    |                                                                                    |                                                 |                                                             |
|----|------------------------------------------------------------------------------------|------------------------------------------------------------------------------------|-------------------------------------------------|-------------------------------------------------------------|
| 9  | 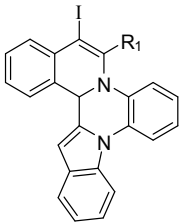  |   | Synthesis/Antifungal activity                   | <i>Eur. J. Med. Chem.</i> , <b>2011</b> , 1919-1925         |
|    |                                                                                    |   | Synthesis/5-HT <sub>2</sub> serotonin receptors | <i>Bioorg. Med. Chem. Lett.</i> , <b>2002</b> , 12, 155-158 |
| 10 |   |   | Synthesis                                       | <i>Farmaco</i> , <b>1995</b> , 50, 137-142                  |
|    |                                                                                    |                                                                                    |                                                 | <i>Steroids</i> , <b>1986</b> , 47, 307-320                 |
|    |                                                                                    |                                                                                    |                                                 | <i>Synthesis</i> , <b>2012</b> , 44, 2519-2526              |
|    |                                                                                    |                                                                                    |                                                 | <i>Eur. J. Org. Chem.</i> , <b>2010</b> , 1999-2007         |
| 11 |  |  | Synthesis/Bronchodilator agents                 | US3835138, <b>1974</b>                                      |

#### 4. General Procedures and Characterization Data of Compounds

##### Condition 1:

To a screw-cap 2.5 ml vial containing stir bar, were added scaffold building agent (N<sub>1</sub>, N<sub>2</sub>, N<sub>4</sub>, N<sub>6</sub>) (0.2205 mmoles) and 2-alkynylbenzaldehyde (0.2205 mmoles) in DCE (0.09 M) followed by the addition of iodine (3 eq). The reaction vial was fitted with a cap, evacuated and filled with nitrogen and stirred at rt for 3 hrs. The reaction mixture was quenched by the addition of aq. sodium thiosulphate solution, diluted with 5 mL water and extracted with DCM (10 mL x 3). Work up and purification by column chromatography using EtOAc/hexane or MeOH/DCM as an eluent afforded analytically pure compounds.

##### Condition 2:

To a screw-cap 2.5 ml vial containing stir bar, were added scaffold building agent (N<sub>9</sub>) (0.1442 mmoles) and 2-alkynylbenzaldehyde (0.1442 mmoles) in CH<sub>3</sub>CN (2.5 mL) followed by the addition of iodine (3 eq). The reaction vial was fitted with a cap and stirred at rt for 8 hrs. The reaction mixture was quenched by the addition of aq. sodium thiosulphate solution, diluted with 5 mL water

and extracted with EtOAc (10 mL x 3). Work up and purification by column chromatography using EtOAc/hexane as an eluent afforded analytically pure compound.

**Condition 3:**

To a screw-cap 2.5 ml vial containing stir bar, were added scaffold building agent (N<sub>10</sub>) (0.2439 mmoles) and 2-alkynylbenzaldehyde (0.2439 mmoles) in CH<sub>3</sub>CN (2.5 ml) followed by the addition of K<sub>2</sub>CO<sub>3</sub> (2 eq), iodine (1.8 eq). The reaction vial was fitted with a cap, evacuated and filled with nitrogen and stirred at rt for 5 hrs. The reaction mixture was quenched by the addition of aq. sodium thiosulphate solution, diluted with 5 mL water, and extracted with EtOAc (10 mL x 3). Work up and purification by column chromatography using EtOAc/hexane as an eluent afforded analytically pure compound.

**Condition 4:**

To a screw-cap 2.5 ml vial containing stir bar, were added scaffold building agent (N<sub>8</sub>) (0.1351 mmoles) and 2-alkynylbenzaldehyde (0.1351 mmoles) in DCE (2.5 mL) followed by the addition of K<sub>2</sub>CO<sub>3</sub> (2 eq), iodine (1.8 eq). The reaction vial was fitted with a cap, evacuated and filled with nitrogen and stirred at 75° C for 5 hrs. The reaction mixture was quenched by the addition of aq. sodium thiosulphate solution, diluted with 5 mL water, and extracted with EtOAc (10 mL x 3). Work up and purification by column chromatography using EtOAc/hexane as an eluent afforded analytically pure compounds.

**Condition 5:**

To a screw-cap 2.5 ml vial containing stir bar, were added scaffold building agent (N<sub>7</sub>) (0.1910 mmoles) and 2-alkynylbenzaldehyde (0.1910 mmoles) in DCE (2.5 mL) followed by the addition of 5 mol % *p*-TSA. The reaction vial was fitted with a cap, evacuated and filled with nitrogen and stirred at rt for 3 hrs. After specified time, K<sub>2</sub>CO<sub>3</sub> (1.2 eq) and iodine (1.1eq) were added in a sequential manner and the reaction mixture was allowed to stir for 2 hrs. The reaction mixture was quenched by the addition of aq. sodium thiosulphate solution, diluted with 5 mL water, and extracted with EtOAc (10 mL x 3). Work up and purification by column chromatography using EtOAc/hexane as an eluent afforded analytically pure compounds.

**Condition 6:**

To a screw-cap 2.5 ml vial containing stir bar, were added scaffold building agent (N<sub>3</sub>, N<sub>5</sub>, N<sub>11</sub>) (0.1442 mmoles) and 2-alkynylbenzaldehyde (0.1442 mmoles) in DCM (0.06 M) followed by the



addition of 5 mol % *p*-TSA. The reaction vial was fitted with a cap, evacuated and filled with nitrogen and allowed to stir at rt for 6 hrs. The reaction mixture was cooled to 0 °C and then ICl (1.1 eq) was added. The reaction mixture was stirred for 2 hrs and then subsequently quenched by the addition of aq. sodium bicarbonate solution followed by addition of water and EtOAc. Work up and purification by column chromatography using EtOAc/hexane as an eluent afforded analytically pure compounds.

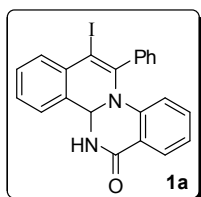

**13-Iodo-12-phenyl-4bH-isoquinolino[2,1-a]quinazolin-6(5H)-one (1a):** 92% yield; yellow solid (M.P. = 106-108 °C);  $R_f$  0.30 (hexane/EtOAc= 70/30);  $^1\text{H}$  NMR (300 MHz,  $\text{CDCl}_3$ ):  $\delta$  8.04 (s, 1H), 7.64 (d,  $J = 7.7$  Hz, 2H), 7.48-7.33 (m, 9H), 7.09 (dd,  $J = 2.3$  Hz,  $J = 8.7$ , 1H), 6.23 (t,  $J = 8.7$  Hz, 1H), 6.11 (s, 1H);  $^{13}\text{C}$  NMR (150 MHz, DMSO  $d_6$ ):  $\delta$  165.7, 153.1, 143.9, 138.5, 136.7, 134.8, 132.9, 132.0, 130.7, 129.1, 128.4, 127.5, 127.2, 126.7, 125.6, 122.5, 117.6, 111.2, 103.1, 70.4, 67.1; IR (KBr):  $\nu_{\text{max}}$  3420, 3057, 2923, 1671, 1626, 1552, 1511, 1471, 1336, 1160, 1129, 1072, 1025, 816, 759, 696, 642, 543 $\text{cm}^{-1}$ ; MS (ESI)  $m/z$  451 ( $\text{M}^+ + \text{H}$ ); HRMS calcd. for  $\text{C}_{22}\text{H}_{16}\text{IN}_2\text{O}$  ( $\text{M}^+ + \text{H}$ ) 451.0307, found 451.0315.

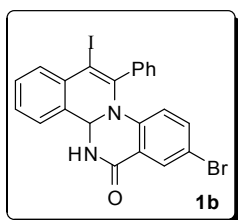

**8-Bromo-13-iodo-12-phenyl-4bH-isoquinolino[2,1-a]quinazolin-6(5H)-one (1b):** 89% yield; yellow solid (M.P. = 136-138 °C);  $R_f$  0.32 (hexane/EtOAc= 70/30);  $^1\text{H}$  NMR (300 MHz,  $\text{CDCl}_3$ ):  $\delta$  8.06 (s, 1H), 7.46 (d,  $J = 8.3$  Hz, 2H), 7.46 (t,  $J = 7.5$  Hz, 3H), 7.38-7.33 (m, 5H), 7.10 (d,  $J = 9.1$  Hz, 1H), 6.24 (d,  $J = 9.1$  Hz, 1H), 6.13 (s, 1H);  $^{13}\text{C}$  NMR (125 MHz, DMSO  $d_6 + \text{CDCl}_3$ ):  $\delta$  164.4, 159.9, 152.5, 141.6, 140.3, 136.8, 135.9, 134.9, 133.8, 133.0, 132.5, 131.9, 128.0, 127.8, 125.8, 124.5, 122.8, 118.8, 116.7, 110.5, 66.3, 65.3; IR (KBr):  $\nu_{\text{max}}$  3429, 3232, 2924, 1674, 1590, 1472, 1392, 1342, 1315, 1284, 1198, 1169, 1127, 1079, 1027, 905, 805, 762, 726, 698, 551, 468  $\text{cm}^{-1}$ ; MS (ESI)  $m/z$  529 ( $\text{M}^+ + \text{H}$ ); HRMS calcd. for  $\text{C}_{22}\text{H}_{15}\text{BrIN}_2\text{O}$  ( $\text{M}^+ + \text{H}$ ) 528.9412, found 528.9418.

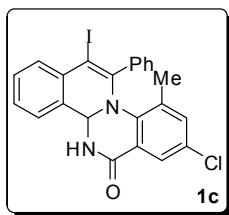

**8-Chloro-13-iodo-10-methyl-12-phenyl-4bH-isoquinolino[2,1-a]quinazolin-6(5H)-one (1c):** 84% yield; brown solid (M.P. = 108-110 °C);  $R_f$  0.34 (hexane/EtOAc= 70/30);  $^1\text{H}$  NMR (500 MHz,  $\text{CDCl}_3$ ):  $\delta$  7.87 (t,  $J$  = 2.4 Hz, 1H), 7.65 (d,  $J$  = 8.1 Hz, 1H), 7.51 (tt,  $J$  = 7.6, 1.4 Hz, 1H), 7.45 (d,  $J$  = 7.6 Hz, 1H), 7.34 (dt,  $J$  = 6.6, 0.9 Hz, 1H), 7.30 (dt,  $J$  = 6.6, 0.9 Hz, 1H), 7.22 (tt,  $J$  = 7.5, 1.2 Hz, 1H), 7.19 (d,  $J$  = 7.5 Hz, 1H), 7.04 (t,  $J$  = 6.9 Hz, 1H), 6.99 (d,  $J$  = 2.3 Hz, 1H), 6.43 (d,  $J$  = 7.8 Hz, 1H), 6.05 (d,  $J$  = 1.8 Hz, 1H), 1.90 (s, 3H);  $^{13}\text{C}$  NMR (75 MHz,  $\text{CDCl}_3$ ):  $\delta$  162.7, 153.5, 144.7, 141.6, 138.3, 135.3, 134.2, 133.7, 132.3, 130.9, 130.5, 129.1, 128.7, 127.8, 127.1, 126.3, 125.5, 124.6, 68.2, 60.3, 17.9; IR (KBr):  $\nu_{\max}$  3381, 3056, 2922, 1725, 1666, 1613, 1584, 1451, 1375, 1264, 1214, 1186, 1136, 1035, 927, 879, 847, 961, 700, 634, 598, 565, 535, 477, 422 $\text{cm}^{-1}$ ; MS (ESI)  $m/z$  499 ( $\text{M}^+$  + H); HRMS calcd. for  $\text{C}_{23}\text{H}_{17}\text{ClIN}_2\text{O}$  ( $\text{M}^+$  + H) 499.0074, found 499.0068.

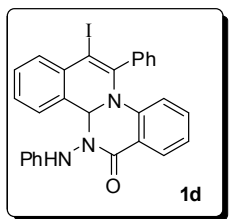

**13-Iodo-12-phenyl-5-(phenylamino)-4bH-isoquinolino[2,1-a]quinazolin-6(5H)-one (1d):** 84% yield; solid (M.P. = 176-178 °C);  $R_f$  0.30 (hexane/EtOAc= 70/30);  $^1\text{H}$  NMR (300 MHz,  $\text{CDCl}_3$ ):  $\delta$  8.05 (d,  $J$  = 7.5 Hz, 2H), 7.91 (d,  $J$  = 7.5 Hz, 1H), 7.62 (d,  $J$  = 7.7 Hz, 1H), 7.49 (d,  $J$  = 7.4 Hz, 3H), 7.40-7.32 (m, 3H), 7.22-7.14 (m, 3H), 7.07-7.00 (m, 2H), 6.80 (t,  $J$  = 7.5 Hz, 1H), 6.68 (d,  $J$  = 8.3 Hz, 1H), 6.46 (d,  $J$  = 7.7 Hz, 1H), 6.41 (d,  $J$  = 8.3 Hz, 1H), 6.05 (s, 1H);  $^{13}\text{C}$  NMR (75 MHz,  $\text{CDCl}_3$ ):  $\delta$  162.3, 145.9, 143.7, 143.1, 136.6, 135.8, 133.7, 131.8, 131.1, 130.2, 129.8, 129.5, 129.2, 128.7, 128.5, 128.4, 125.7, 125.2, 122.3, 121.9, 120.7, 116.5, 113.8, 69.4, 75.0; IR (KBr):  $\nu_{\max}$  3255, 3025, 2922, 1663, 1597, 1491, 1467, 1403, 1300, 1272, 1154, 1109, 1029, 966, 876, 847, 817, 753, 694, 577, 546, 499  $\text{cm}^{-1}$ ; MS (ESI)  $m/z$  542 ( $\text{M}^+$  + H); HRMS calcd. for  $\text{C}_{28}\text{H}_{21}\text{IN}_3\text{O}$  ( $\text{M}^+$  + H) 542.0729, found 542.0723.

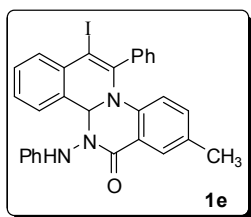

**13-Iodo-12-phenyl-8-methyl-5-(phenylamino)-4bH-isoquinolino[2,1-a]quinazolin-6(5H)-one (1e):** 83% yield; solid (M.P. = 164-166 °C);  $R_f$  0.31 (hexane/EtOAc= 70/30);  $^1\text{H}$  NMR (300 MHz,  $\text{CDCl}_3$ ):  $\delta$  8.04 (d,  $J = 2.3$  Hz, 1H), 8.01 (d,  $J = 1.5$  Hz, 1H), 7.84 (d,  $J = 2.3$  Hz, 1H), 7.61 (dd,  $J = 1.5$  Hz,  $J = 6.0$ , 1H), 7.33-7.28 (m, 2H), 7.20-7.16 (m, 5H), 7.02-6.96 (m, 2H), 6.84 (dt,  $J = 2.3$  Hz,  $J = 6.0$ , 2H), 6.70-6.65 (m, 1H), 6.34 (d,  $J = 8.3$  Hz, 1H), 6.30 (d,  $J = 9.0$  Hz, 1H), 6.01 (s, 1H), 2.13 (s, 3H);  $^{13}\text{C}$  NMR (150 MHz,  $\text{DMSO-d}_6$ ):  $\delta$  164.2, 160.8, 148.7, 147.1, 143.4, 140.4, 136.6, 135.7, 134.3, 132.5, 131.0, 130.7, 129.9, 129.8, 129.3, 128.4, 128.1, 127.7, 125.0, 122.7, 119.8, 116.1, 112.3, 75.8, 74.8, 19.7; IR (KBr):  $\nu_{\text{max}}$  3258, 3056, 3024, 2922, 2855, 1662, 1603, 1490, 1441, 1405, 1344, 1273, 1136, 1027, 966, 906, 822, 751, 727, 693, 534, 502  $\text{cm}^{-1}$ ; MS (ESI)  $m/z$  556 ( $\text{M}^+ + \text{H}$ ); HRMS calcd. for  $\text{C}_{29}\text{H}_{23}\text{N}_3\text{OI}$  ( $\text{M}^+ + \text{H}$ ) 556.0886, found 556.0880.

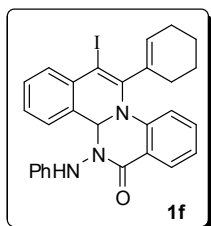

**13-Iodo-12-cyclohexenyl-5-(phenylamino)-4bH-isoquinolino[2,1-a]quinazolin-6(5H)-one (1f):** 81% yield; solid (M.P. = 170-172 °C);  $R_f$  0.32 (hexane/EtOAc= 70/30);  $^1\text{H}$  NMR (500 MHz,  $\text{CDCl}_3$ ):  $\delta$  7.88 (d,  $J = 7.8$  Hz, 1H), 7.30-7.27 (m, 4H), 7.23-7.20 (m, 2H), 7.11 (d,  $J = 7.8$  Hz, 2H), 6.96 (d,  $J = 7.3$  Hz, 1H), 6.82 (t,  $J = 7.8$  Hz, 1H), 6.46 (d,  $J = 8.2$  Hz, 1H), 5.73 (s, 1H), 1.88-1.69 (m, 8H);  $^{13}\text{C}$  NMR (125 MHz,  $\text{DMSO}$ ):  $\delta$  165.1, 161.2, 147.4, 145.0, 143.3, 133.5, 132.5, 130.9, 130.6, 129.2, 128.4, 127.3, 126.2, 123.5, 119.9, 117.4, 116.3, 115.3, 112.3, 75.6, 75.0, 25.6, 24.2, 22.1, 21.7; IR (KBr):  $\nu_{\text{max}}$  3251, 3052, 3029, 2921, 2850, 1668, 1607, 1491, 1446, 1408, 1341, 1275, 1132, 1022, 962, 904, 820, 759, 725, 698, 531  $\text{cm}^{-1}$ ; MS (ESI)  $m/z$  546 ( $\text{M}^+ + \text{H}$ ); HRMS calcd. for  $\text{C}_{28}\text{H}_{25}\text{IN}_3\text{O}$  ( $\text{M}^+ + \text{H}$ ) 546.1042, found 546.1048.

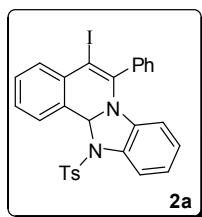

**5-Iodo-6-phenyl-12-tosyl-12,12a-dihydrobenzo[4,5]imidazo[2,1-a]isoquinoline (2a):** 72% yield; thick liquid;  $R_f$  0.52 (hexane/EtOAc= 90/10);  $^1\text{H}$  NMR (300 MHz,  $\text{CDCl}_3$ ):  $\delta$  7.72-7.68 (m, 1H), 7.60 (d,  $J = 7.5$  Hz, 1H), 7.54-7.52 (m, 3H), 7.39-7.36 (m, 3H), 7.31-7.26 (m, 4H), 7.02 (d,  $J = 7.5$  Hz, 2H), 6.75 (t,  $J = 7.5$  Hz, 1H), 6.63 (t,  $J = 8.3$  Hz, 1H), 6.55 (s, 1H), 5.31 (d,  $J = 6.8$  Hz, 1H), 2.51 (s, 3H);  $^{13}\text{C}$  NMR (75 MHz,  $\text{CDCl}_3$ ):  $\delta$  144.4, 142.6, 139.7, 138.8, 133.7, 133.1, 131.1, 130.4, 129.9, 129.6, 128.7, 128.1, 127.6, 127.1, 126.4, 126.0, 123.9, 117.3, 114.7, 110.8, 82.7, 78.3, 21.3; IR :  $\nu_{\text{max}}$  3446, 2924, 2856, 1728, 1630, 1593, 1539, 1454, 1378, 1236, 1152, 1110, 1001, 912, 811, 741, 678, 562  $\text{cm}^{-1}$ ; MS (ESI)  $m/z$  577 ( $\text{M}^+ + \text{H}$ ); HRMS calcd. for  $\text{C}_{28}\text{H}_{22}\text{IN}_2\text{O}_2\text{S}(\text{M}^+ + \text{H})$  577.0447, found 577.0452.

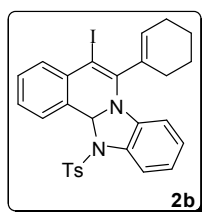

**5-Iodo-6-cyclohexenyl-12-tosyl-12,12a-dihydrobenzo[4,5]imidazo[2,1-a]isoquinoline (2b):** 68% yield; yellow solid (M.P. = 78-80 °C);  $R_f$  0.54 (hexane/EtOAc= 90/10);  $^1\text{H}$  NMR (300 MHz,  $\text{CDCl}_3$ ):  $\delta$  7.63-7.59 (m, 2H), 7.47-7.41 (m, 3H), 7.32-7.29 (m, 2H), 7.19 (d,  $J = 8.3$  Hz, 2H), 6.89 (t,  $J = 6.0$  Hz, 1H), 6.81 (t,  $J = 7.5$  Hz, 1H), 6.47 (d,  $J = 6.8$  Hz, 1H), 6.00-5.98 (m, 1H), 2.38 (s, 3H), 1.61-1.57 (m, 8H);  $^{13}\text{C}$  NMR (75 MHz,  $\text{CDCl}_3$ ):  $\delta$  139.5, 136.7, 134.8, 132.6, 131.8, 129.6, 128.9, 128.6, 127.5, 127.1, 126.1, 125.5, 123.3, 122.8, 120.4, 119.1, 114.6, 110.3, 86.7, 78.2, 27.3, 25.3, 22.2, 21.5, 21.3; IR (KBr):  $\nu_{\text{max}}$  3448, 2920, 2852, 1726, 1635, 1591, 1530, 1458, 1371, 1239, 1158, 1008, 914, 816, 742, 676, 560  $\text{cm}^{-1}$ ; MS (ESI)  $m/z$  581 ( $\text{M}^+ + \text{H}$ ); HRMS calcd. for  $\text{C}_{28}\text{H}_{26}\text{IN}_2\text{O}_2\text{S}(\text{M}^+ + \text{H})$  581.0760, found 581.0765.

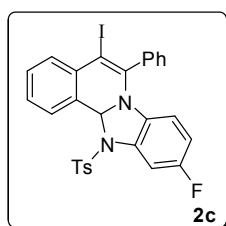

**10-Fluoro-5-iodo-6-phenyl-12-tosyl-12,12a-dihydrobenzo[4,5]imidazo[2,1-a]isoquinoline (2c):** 60% yield; thick liquid;  $R_f$  0.50 (hexane/EtOAc= 90/10);  $^1\text{H}$  NMR (300 MHz,  $\text{CDCl}_3$ ):  $\delta$  7.69-7.67 (m, 1H), 7.56-7.52 (m, 4H), 7.42-7.39 (m, 2H), 7.38-7.35 (m, 2H), 7.32-7.28 (m, 3H), 6.97 (d,  $J = 7.5$  Hz, 2H), 6.57 (s, 1H), 6.43 (dt,  $J = 3.0$ ,  $J = 6.0$  Hz, 1H), 5.01 (dd,  $J = 2.3$ ,  $J = 6.8$  Hz, 1H), 2.54 (s, 3H);  $^{13}\text{C}$  NMR (125 MHz,  $\text{CDCl}_3$ ):  $\delta$  162.5, 160.6 ( $J_{^{13}\text{C}-^{19}\text{F}} = 243.4$  Hz), 144.8, 140.3, 140.2, 138.4, 135.3, 133.6, 132.7, 130.8, 130.5, 130.0, 129.8, 129.1, 129.0, 128.3, 127.7, 126.9, 123.5, 120.1, 120.0 ( $J_{^{13}\text{C}-^{19}\text{F}} = 9.9$  Hz), 106.6, 106.4 ( $J_{^{13}\text{C}-^{19}\text{F}} = 23.6$  Hz), 99.4, 99.2 ( $J_{^{13}\text{C}-^{19}\text{F}} = 29.9$  Hz), 83.8, 79.1, 21.6; IR :  $\nu_{\text{max}}$  3441, 2929, 2853, 1722, 1637, 1537, 1455, 1372, 1239, 1150, 1114, 910, 817, 743, 675, 568  $\text{cm}^{-1}$ ; MS (ESI)  $m/z$  595 ( $\text{M}^+ + \text{H}$ ); HRMS calcd. for  $\text{C}_{28}\text{H}_{21}\text{FIN}_2\text{O}_2\text{S}$  ( $\text{M}^+ + \text{H}$ ) 595.0352, found 595.0356.

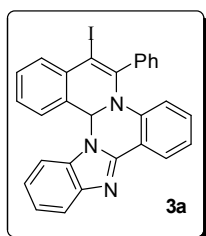

**10-Iodo-9-phenyl-14bH-benzimidazo[1,2-c]isoquinolino[2,1-a]quinazoline (3a):** 75% yield; yellow solid (M.P. = 198-200  $^{\circ}\text{C}$ );  $R_f$  0.40 (hexane/EtOAc= 70/30);  $^1\text{H}$  NMR (300 MHz,  $\text{CDCl}_3$ ):  $\delta$  8.13 (dd,  $J = 1.5$  Hz,  $J = 6.0$ , 1H), 7.97-7.94 (m, 3H), 7.72 (t,  $J = 7.5$  Hz, 1H), 7.44-7.42 (m, 4H), 7.35 (t,  $J = 3.7$  Hz, 2H), 7.13 (t,  $J = 7.5$  Hz, 1H), 6.93 (dt,  $J = 1.5$  Hz,  $J = 6.0$ , 2H), 6.88 (d,  $J = 6.8$  Hz, 2H), 6.48 (d,  $J = 6.8$  Hz, 1H), 6.38 (d,  $J = 7.5$  Hz, 1H);  $^{13}\text{C}$  NMR (75 MHz,  $\text{CDCl}_3$ ):  $\delta$  144.3, 141.9, 138.8, 137.2, 134.9, 133.8, 132.4, 130.8, 130.5, 130.3, 129.4, 128.8, 128.3, 127.9, 127.7, 127.6, 126.6, 124.6, 122.4, 121.2, 119.6, 116.9, 70.4, 59.4; IR (KBr):  $\nu_{\text{max}}$  3062, 2954, 2924, 2860, 1728, 1614, 1582, 1530, 1471, 1378, 1306, 1242, 1156, 1120, 1072, 836, 751, 614  $\text{cm}^{-1}$ ; MS (ESI)  $m/z$  524 ( $\text{M}^+ + \text{H}$ ); HRMS calcd. for  $\text{C}_{28}\text{H}_{19}\text{IN}_3$  ( $\text{M}^+ + \text{H}$ ) 524.0624, found 524.0632.

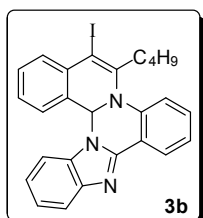

**10-Iodo-9-n-butyl-14bH-benzimidazo[1,2-c]isoquinolino[2,1-a]quinazoline (3b):** 71% yield; thick liquid;  $R_f$  0.42 (hexane/EtOAc= 70/30);  $^1\text{H}$  NMR (500 MHz,  $\text{CDCl}_3$ ):  $\delta$  8.15 (dd,  $J = 1.5$  Hz,  $J = 6.2$ , 1H), 7.93 (d,  $J = 8.1$  Hz, 1H), 7.59 (d,  $J = 7.2$  Hz, 1H), 7.38 (d,  $J = 6.6$  Hz, 1H), 7.34-7.29 (m,

3H), 7.22 (d,  $J = 5.9$  Hz, 1H), 7.05 (t,  $J = 6.6$  Hz, 1H), 6.99 (t,  $J = 6.7$  Hz, 1H), 6.61 (d,  $J = 8.1$  Hz, 1H), 6.59 (s, 1H), 6.32 (d,  $J = 7.6$  Hz, 1H), 3.09-3.03 (m, 1H), 2.63-2.57 (m, 1H), 1.89-1.82 (m, 1H), 1.73-1.64 (m, 1H), 1.49-1.43 (m, 2H), 0.94 (t,  $J = 7.3$  Hz, 3H);  $^{13}\text{C}$  NMR (75 MHz,  $\text{CDCl}_3$ ):  $\delta$  147.7, 145.3, 141.1, 134.9, 133.8, 131.3, 129.6, 129.0, 128.4, 16.2, 125.4, 123.3, 122.9, 122.1, 121.6, 120.9, 119.9, 116.3, 111.1, 109.0, 73.7, 69.5, 36.7, 28.5, 22.1, 13.2; IR:  $\nu_{\text{max}}$  3062, 2958, 2928, 2864, 1729, 1616, 1585, 1534, 1473, 1377, 1303, 1240, 1158, 1122, 1072, 919, 838, 751, 618  $\text{cm}^{-1}$ ; MS (ESI)  $m/z$  504 ( $\text{M}^+ + \text{H}$ ); HRMS calcd. for  $\text{C}_{26}\text{H}_{23}\text{IN}_3$  ( $\text{M}^+ + \text{H}$ ) 504.0937, found 504.0931.

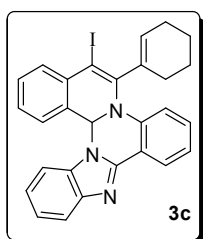

**10-Iodo-9-cyclohexenyl-14bH-benzimidazo[1,2-c]isoquinolino[2,1-a]quinazoline (3c):** 62% yield; yellow solid (M.P. = 188-190 °C);  $R_f$  0.41 (hexane/EtOAc= 70/30);  $^1\text{H}$  NMR (500 MHz,  $\text{CDCl}_3$ ):  $\delta$  7.62 (d,  $J = 7.7$  Hz, 1H), 7.41(t,  $J = 8.1$  Hz, 1H), 7.32 (d,  $J = 7.4$  Hz, 3H), 7.19 (t,  $J = 7.5$  Hz, 2H), 7.06 (d,  $J = 7.4$  Hz, 1H), 6.98 (t,  $J = 7.4$  Hz, 1H), 6.83 (d,  $J = 8.5$  Hz, 1H), 6.68-6.63 (m, 2H), 6.30 (d,  $J = 7.5$  Hz, 1H), 7.42-7.35 (m, 4H), 7.28 (dd,  $J = 1.5$  Hz,  $J = 6.0$ , 2H), 7.20-7.12 (m, 2H), 6.94 (d,  $J = 7.5$  Hz, 1H), 5.86 (s, 1H), 1.75-1.42 (m, 8H);  $^{13}\text{C}$  NMR (125 MHz,  $\text{CDCl}_3$ ):  $\delta$  146.9, 145.8, 139.3, 138.0, 136.6, 135.6, 134.6, 133.7, 131.8, 131.1, 128.9, 127.7, 127.2, 125.9, 123.7, 121.5, 119.4, 116.9, 111.6, 109.3, 69.4, 60.3, 28.9, 25.7, 22.8, 21.7; IR (KBr):  $\nu_{\text{max}}$  3064, 2956, 2925, 2860, 1728, 1614, 1582, 1530, 1471, 1378, 1306, 1242, 1156, 1120, 1072, 836, 751, 614  $\text{cm}^{-1}$ ; MS (ESI)  $m/z$  528 ( $\text{M}^+ + \text{H}$ ); HRMS calcd. for  $\text{C}_{28}\text{H}_{23}\text{IN}_3$  ( $\text{M}^+ + \text{H}$ ) 528.0937, found 528.0931.

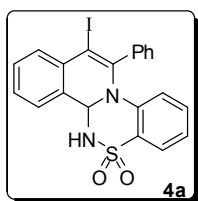

**13-Iodo-12-phenyl-4bH-benzo[5,6][1,2,4]thiadiazino[3,4-a]isoquinoline-6,6-dione (4a):** 80% yield; yellow solid (M.P. = 124-126 °C);  $R_f$  0.35 (hexane/EtOAc= 70/30);  $^1\text{H}$  NMR (500 MHz,  $\text{DMSO } d_6$ ):  $\delta$  9.19 (d,  $J = 11.1$  Hz, 1H), 7.61 (t,  $J = 8.7$  Hz, 2H), 7.50 (t,  $J = 7.2$  Hz, 2H), 7.41-7.37 (m, 3H), 7.34-7.27 (m, 3H), 7.06 (t,  $J = 7.9$  Hz, 1H), 6.94 (d,  $J = 7.7$  Hz, 1H), 6.48 (d,  $J = 7.7$  Hz, 1H), 6.19 (d,  $J = 10.9$  Hz, 1H);  $^{13}\text{C}$  NMR (125 MHz,  $\text{CDCl}_3$ ):  $\delta$  142.3, 139.7, 139.0, 137.6, 135.7,

130.9, 129.6, 129.2, 128.9, 128.7, 128.6, 128.5, 128.1, 127.7, 127.5, 125.2, 124.0, 70.5, 60.4; IR (KBr):  $\nu_{max}$  3381, 3055, 1654, 1617, 1589, 1479, 1444, 1380, 1338, 1205, 1167, 1080, 1022, 916, 758, 700, 596, 544  $\text{cm}^{-1}$ ; MS (ESI)  $m/z$  486 ( $M^+ + H$ ); HRMS calcd. for  $C_{21}H_{16}IN_2O_2S$  ( $M^+ + H$ ) 486.9977, found 486.9972.

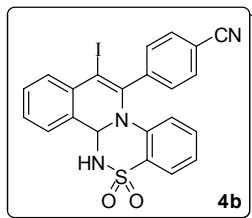

**13-Iodo-12-(4-cyanophenyl)-4bH-benzo[5,6][1,2,4]thiadiazino[3,4-a]isoquinoline-6,6-dione**

**(4b)**: 87% yield; yellow solid (M.P. = 150-152 °C);  $R_f$  0.36 (hexane/EtOAc= 70/30);  $^1H$  NMR (300 MHz,  $CDCl_3$ ):  $\delta$  7.75 (d,  $J = 7.5$  Hz, 1H), 7.68-7.65 (m, 1H), 7.62-7.59 (m, 1H), 7.46-7.44 (m, 2H), 7.40-7.37 (m, 3H), 7.30-7.28 (m, 3H), 6.91 (t,  $J = 6.8$  Hz, 1H), 6.73 (d,  $J = 8.3$  Hz, 1H), 6.47 (d,  $J = 12.8$  Hz, 1H);  $^{13}C$  NMR (125 MHz,  $CDCl_3$ ):  $\delta$  140.2, 138.5, 137.8, 132.8, 132.5, 131.9, 131.6, 131.2, 129.7, 129.4, 127.9, 125.8, 124.2, 122.7, 118.4, 118.2, 112.5, 111.9, 70.8, 60.4; IR (KBr):  $\nu_{max}$  3388, 3050, 2252, 1650, 1612, 1582, 1478, 1442, 1382, 1335, 1202, 1168, 1084, 1028, 914, 752, 590, 541  $\text{cm}^{-1}$ ; MS (ESI)  $m/z$  289 ( $M^+ + H$ ); HRMS calcd. for  $C_{23}H_{15}IN_3O_2S$  ( $M^+ + H$ ) 511.9930, found 511.9938.

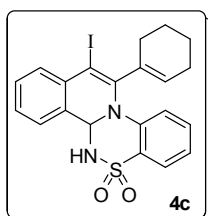

**13-Iodo-12-cyclohexenyl-4bH-benzo[5,6][1,2,4]thiadiazino[3,4-a]isoquinoline-6,6-dione (4c):**

78% yield; yellow solid (M.P. = 140-142 °C);  $R_f$  0.38 (hexane/EtOAc= 70/30);  $^1H$  NMR (300 MHz,  $CDCl_3$ ):  $\delta$  7.84 (d,  $J = 7.9$  Hz, 1H), 7.59 (d,  $J = 7.9$  Hz, 1H), 7.43 (t,  $J = 7.5$  Hz, 1H), 7.38 (t,  $J = 7.0$  Hz, 1H), 7.30 (t,  $J = 6.6$  Hz, 1H), 7.24-7.22 (m, 2H), 7.08 (d,  $J = 8.1$  Hz, 1H), 6.18 (d,  $J = 12.3$  Hz, 1H), 6.03 (s, 1H), 5.41 (d,  $J = 8.5$  Hz, 1H), 1.68-1.41 (m, 8H);  $^{13}C$  NMR (125 MHz,  $CDCl_3$ ):  $\delta$  156.4, 144.3, 142.2, 139.3, 136.6, 135.7, 134.5, 131.7, 130.7, 129.2, 129.8, 128.5, 128.0, 126.9, 124.5, 123.6, 70.0, 53.4, 29.6, 25.1, 22.1, 21.4; IR (KBr):  $\nu_{max}$  3421, 3017, 1620, 1588, 1480, 1447, 1378, 1336, 1270, 1169, 1079, 906, 750, 689, 646, 593, 554, 494  $\text{cm}^{-1}$ ; MS (ESI)  $m/z$  491 ( $M^+ + H$ ); HRMS calcd. for  $C_{21}H_{20}IN_2O_2S$  ( $M^+ + H$ ) 491.0290, found 491.0294.

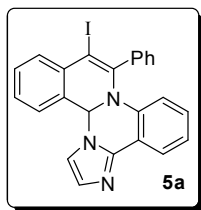

**10-Iodo-9-phenyl-14bH-imidazo[1,2-c]isoquinolino[2,1-a]quinazoline (5a):** 84% yield; solid (M.P. = 208-210 °C);  $R_f$  0.33 (hexane/EtOAc= 70/30);  $^1\text{H}$  NMR (300 MHz,  $\text{CDCl}_3$ ):  $\delta$  8.41 (d,  $J$  = 7.5 Hz, 1H), 7.80 (d,  $J$  = 7.5 Hz, 1H), 7.69 (t,  $J$  = 6.8 Hz, 2H), 7.57 (d,  $J$  = 6.8 Hz, 1H), 7.52 (d,  $J$  = 7.5 Hz, 1H), 7.44-7.38 (m, 4H), 7.42-7.35 (m, 4H), 7.30 (s, 1H), 7.11-7.04 (m, 2H), 7.01 (s, 1H), 6.62 (d,  $J$  = 8.3 Hz, 1H), 6.13 (d,  $J$  = 6.8 Hz, 1H);  $^{13}\text{C}$  NMR (75 MHz,  $\text{CDCl}_3$ ):  $\delta$  145.8, 143.7, 136.5, 135.2, 132.7, 131.5, 131.1, 130.9, 130.8, 128.4, 128.2, 127.9, 127.8, 127.6, 127.2, 127.0, 126.4, 124.8, 123.6, 115.3, 73.3, 70.3; IR (KBr):  $\nu_{\text{max}}$  3425, 3048, 2925, 2858, 1654, 1572, 1558, 1520, 1472, 1441, 1380, 1352, 1293, 1241, 1214, 1132, 1091, 1060, 978, 875, 804, 732, 693, 576, 462  $\text{cm}^{-1}$ ; MS (ESI)  $m/z$  474 ( $\text{M}^+ + \text{H}$ ); HRMS calcd. for  $\text{C}_{24}\text{H}_{17}\text{IN}_3$  ( $\text{M}^+ + \text{H}$ ) 474.0467, found 474.0462.

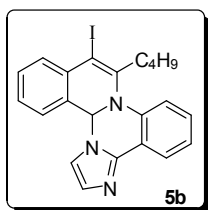

**10-Iodo-9-n-butyl-14bH-imidazo[1,2-c]isoquinolino[2,1-a]quinazoline (5b):** 62% yield; thick liquid;  $R_f$  0.32 (hexane/EtOAc= 70/30);  $^1\text{H}$  NMR (300 MHz,  $\text{CDCl}_3$ ):  $\delta$  8.81 (d,  $J$  = 6.0 Hz, 1H), 8.00 (d,  $J$  = 8.3 Hz, 1H), 7.82 (t,  $J$  = 7.5 Hz, 2H), 7.65-7.63 (m, 2H), 7.46 (t,  $J$  = 8.3 Hz, 1H), 7.12 (t,  $J$  = 7.5 Hz, 2H), 6.72 (t,  $J$  = 7.5 Hz, 1H), 6.43 (d,  $J$  = 8.3 Hz, 1H), 1.79-1.66 (m, 2H), 0.84-0.74 (m, 2H), 0.69-0.56 (m, 2H), 0.41 (t,  $J$  = 6.8 Hz, 3H);  $^{13}\text{C}$  NMR (125 MHz,  $\text{CDCl}_3$ ):  $\delta$  147.8, 145.5, 139.1, 134.2, 131.0, 130.1, 128.4, 128.2, 127.6, 126.5, 126.1, 124.3, 123.7, 125.6, 115.9, 115.6, 73.4, 71.3, 36.8, 28.5, 22.1, 13.2; IR :  $\nu_{\text{max}}$  3063, 2957, 2927, 2862, 2229, 1717, 1617, 1529, 1473, 1378, 1309, 1158, 1104, 940, 871, 760, 664  $\text{cm}^{-1}$ ; MS (ESI)  $m/z$  454 ( $\text{M}^+ + \text{H}$ ); HRMS calcd. for  $\text{C}_{22}\text{H}_{21}\text{IN}_3$  ( $\text{M}^+ + \text{H}$ ) 454.0780, found 454.0774.

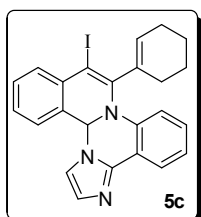



**10-Iodo-9-cyclohexenyl-14bH-imidazo[1,2-c]isoquinolino[2,1-a]quinazoline (5c):** 75% yield; solid (M.P. = 168-170 °C);  $R_f$  0.31 (hexane/EtOAc= 70/30);  $^1\text{H}$  NMR (300 MHz,  $\text{CDCl}_3$ ):  $\delta$  8.02 (d,  $J = 7.5$  Hz, 1H), 7.64 (t,  $J = 7.5$  Hz, 1H), 7.52 (t,  $J = 6.8$  Hz, 1H), 7.39-7.28 (m, 4H), 7.19-7.17 (m, 1H), 7.05-7.04 (m, 1H), 6.48-6.46 (m, 1H), 6.39-6.36 (m, 1H), 5.81 (s, 1H), 2.12-1.45 (m, 8H);  $^{13}\text{C}$  NMR (75 MHz,  $\text{CDCl}_3$ ):  $\delta$  147.5, 142.5, 138.9, 137.1, 133.9, 133.0, 131.9, 130.8, 130.5, 128.8, 127.9, 127.7, 127.3, 127.2, 126.6, 124.7, 123.8, 123.3, 121.2, 116.5, 70.4, 69.9, 25.9, 24.9, 21.8, 21.3; IR (KBr):  $\nu_{\text{max}}$  3423, 3045, 2924, 2854, 1702, 1659, 1579, 1551, 1526, 1478, 1448, 1387, 1356, 1290, 1244, 1217, 1138, 1095, 1069, 1037, 976, 920, 872, 809, 758, 735, 695, 579, 532, 465  $\text{cm}^{-1}$ ; MS (ESI)  $m/z$  478 ( $\text{M}^+ + \text{H}$ ); HRMS calcd. for  $\text{C}_{24}\text{H}_{21}\text{IN}_3$  ( $\text{M}^+ + \text{H}$ ) 478.0780, found 478.0774.

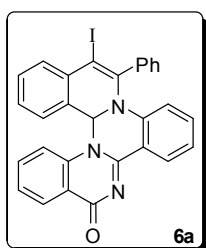

**16-Iodo-17-phenyl-isoquinolino[2,1-a]quinazolin-6(11aH)-one (6a):** 49% yield; thick liquid;  $R_f$  0.40 (hexane/EtOAc= 70/30);  $^1\text{H}$  NMR (300 MHz,  $\text{CDCl}_3$ ):  $\delta$  9.01 (d,  $J = 8.1$  Hz, 1H), 8.36 (dd,  $J = 1.3$  Hz,  $J = 6.4$ , 1H), 7.78 (d,  $J = 6.6$  Hz, 1H), 7.67-7.64 (m, 3H), 7.41-7.37 (m, 8H), 7.22-7.19 (m, 2H), 7.11 (s, 1H), 7.00 (d,  $J = 8.5$  Hz, 1H), 6.83 (d,  $J = 8.1$  Hz, 1H);  $^{13}\text{C}$  NMR (125 MHz,  $\text{CDCl}_3$ ):  $\delta$  160.7, 151.5, 146.7, 142.1, 138.3, 133.1, 132.2, 131.5, 131.2, 130.5, 130.1, 129.3, 128.9, 128.7, 128.2, 128.0, 127.8, 127.2, 126.5, 125.3, 123.7, 121.4, 120.7, 116.7, 67.9, 66.7, 46.4 ; IR :  $\nu_{\text{max}}$  2925, 1670, 1628, 1550, 1510, 1476, 1338, 1156, 1122, 1078, 1024, 806, 548  $\text{cm}^{-1}$ ; MS (ESI)  $m/z$  552 ( $\text{M}^+ + \text{H}$ ); HRMS calcd. for  $\text{C}_{29}\text{H}_{19}\text{IN}_3\text{O}$  ( $\text{M}^+ + \text{H}$ ) 552.0573, found 552.0578.

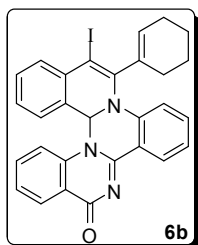

**16-Iodo-17-cyclohexenyl-isoquinolino[2,1-a]quinazolin-6(11aH)-one (6b):** 53% yield; thick liquid;  $R_f$  0.42 (hexane/EtOAc= 70/30);  $^1\text{H}$  NMR (300 MHz,  $\text{CDCl}_3$ ):  $\delta$  7.84 (d,  $J = 8.3$  Hz, 1H), 7.44 (d,  $J = 4.5$  Hz, 1H), 7.38-7.20 (m, 3H), 7.16 (s, 1H), 7.14-7.10 (m, 2H), 6.80 (t,  $J = 7.5$  Hz, 1H), 6.54 (s, 1H), 6.47-6.43 (m, 2H), 5.64 (d,  $J = 4.5$  Hz, 1H), 1.83-1.64 (m, 8H).  $^{13}\text{C}$  NMR

(125 MHz, CDCl<sub>3</sub>):  $\delta$  160.6, 147.1, 145.1, 144.2, 138.4, 134.7, 133.2, 132.4, 130.1, 129.7, 128.2, 127.7, 127.2, 125.5, 123.5, 122.9, 120.6, 119.8, 116.8, 115.8, 115.3, 67.7, 60.3, 25.8, 24.9, 22.5, 22.1; IR :  $\nu_{max}$  2921, 1674, 1618, 1518, 1466, 1328, 1154, 1112, 1072, 1026, 807, 545 cm<sup>-1</sup>; MS (ESI)  $m/z$  556 (M<sup>+</sup> + H); HRMS calcd. for C<sub>29</sub>H<sub>23</sub>IN<sub>3</sub>O (M<sup>+</sup> + H) 556.0886, found 556.0892.

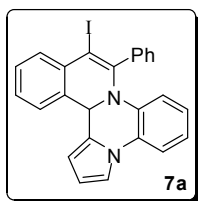

**11-Iodo-10-phenyl-15bH-isoquinolino[2,1-a]pyrrolo[2,1-c]quinoxaline (7a):** 55% yield; thick liquid; R<sub>f</sub> 0.80 (hexane/EtOAc= 95/05); <sup>1</sup>H NMR (300 MHz, CDCl<sub>3</sub>):  $\delta$  7.82-7.79 (m, 2H), 7.42-7.35 (m, 4H), 7.28 (dd,  $J$  = 1.5 Hz,  $J$  = 6.0, 2H), 7.20-7.12 (m, 2H), 6.94 (d,  $J$  = 7.5 Hz, 1H), 6.73 (dt,  $J$  = 1.5 Hz,  $J$  = 6.0, 1H), 6.64 (dt,  $J$  = 1.5 Hz,  $J$  = 6.0, 1H), 6.52 (t,  $J$  = 3.0 Hz, 1H), 6.35-6.30 (m, 2H), 5.65 (s, 1H); <sup>13</sup>C NMR (75 MHz, CDCl<sub>3</sub>):  $\delta$  143.4, 135.7, 133.6, 129.8, 128.9, 128.8, 127.9, 127.6, 126.2, 124.9, 124.6, 124.3, 123.4, 119.9, 118.9, 116.8, 114.6, 114.5, 110.4, 107.9, 68.2, 56.9; IR :  $\nu_{max}$  3058, 2924, 2853, 1695, 1607, 1560, 1473, 1453, 1343, 1282, 1240, 1200, 1106, 1049, 1024, 919, 889, 849, 760, 720, 696, 671, 608, 566, 534, 448 cm<sup>-1</sup>; MS (ESI)  $m/z$  473 (M<sup>+</sup> + H); HRMS calcd. for C<sub>25</sub>H<sub>18</sub>IN<sub>2</sub> (M<sup>+</sup> + H) 473.0515, found 473.0518.

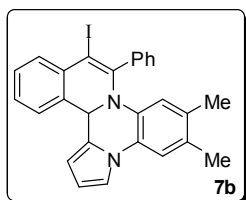

**11-Iodo-6,7-dimethyl-10-phenyl-15bH-isoquinolino[2,1-c]quinoxaline (7b):** 59% yield; thick liquid; R<sub>f</sub> 0.81 (hexane/EtOAc= 95/05); <sup>1</sup>H NMR (300 MHz, CDCl<sub>3</sub>):  $\delta$  7.80 (d,  $J$  = 6.8 Hz, 2H), 7.28-7.39 (m, 4H), 7.21 (dt,  $J$  = 1.5 Hz,  $J$  = 6.0, 1H), 7.13 (dt,  $J$  = 1.5 Hz,  $J$  = 6.0, 2H), 7.05 (s, 1H), 6.92 (d,  $J$  = 7.5 Hz, 1H), 6.48 (d,  $J$  = 3.0 Hz, 1H), 6.30 (d,  $J$  = 3.0 Hz, 1H), 6.08 (s, 1H), 5.59 (s, 1H), 2.08 (s, 3H), 1.84 (s, 3H); <sup>13</sup>C NMR (75 MHz, CDCl<sub>3</sub>):  $\delta$  143.6, 141.7, 136.2, 135.1, 132.8, 129.7, 128.9, 128.4, 128.7, 127.7, 127.4, 126.2, 125.9, 124.6, 120.2, 116.4, 115.8, 114.3, 109.9, 107.6, 68.2, 57.0, 19.5, 19.0 ; IR :  $\nu_{max}$  2924, 2855, 1728, 1660, 1598, 1518, 1446, 1342, 1249, 1157, 1081, 1029, 858, 757, 667, 613 cm<sup>-1</sup>; MS (ESI)  $m/z$  501 (M<sup>+</sup> + H); HRMS calcd. for C<sub>27</sub>H<sub>22</sub>IN<sub>2</sub> (M<sup>+</sup> + H) 501.0828, found 501.0824.

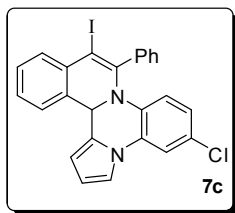

**6-Chloro-11-iodo-10-phenyl-15bH-isoquinolino[2,1-a]pyrrolo[2,1-c]quinoxaline (7c):** 50% yield; thick liquid;  $R_f$  0.82 (hexane/EtOAc= 95/05);  $^1\text{H}$  NMR (300 MHz,  $\text{CDCl}_3$ ):  $\delta$  7.78 (d,  $J = 8.1$  Hz, 2H), 7.42-7.35 (m, 4H), 7.30-7.27 (m, 2H), 7.19-7.16 (m, 2H), 6.93 (d,  $J = 7.4$  Hz, 1H), 6.68 (dd,  $J = 2.1$  Hz,  $J = 6.2$  Hz, 1H), 6.52 (t,  $J = 3.2$  Hz, 1H), 6.35 (d,  $J = 2.3$  Hz, 1H), 6.28 (d,  $J = 2.1$  Hz, 1H), 5.63 (s, 1H);  $^{13}\text{C}$  NMR (75 MHz,  $\text{CDCl}_3$ ):  $\delta$  142.8, 134.9, 133.5, 132.5, 130.9, 129.1, 128.8, 128.3, 128.0, 127.8, 126.1, 124.5, 125.1, 119.9, 118.7, 117.3, 115.4, 114.6, 110.8, 108.2, 108.5, 57.2, 56.9; IR :  $\nu_{\text{max}}$  3054, 2922, 2855, 1698, 1600, 1568, 1475, 1459, 1341, 1280, 1244, 1104, 1047, 1022, 914, 885, 843, 762, 724, 692, 675  $\text{cm}^{-1}$ ; MS (ESI)  $m/z$  507 ( $\text{M}^+ + \text{H}$ ); HRMS calcd. for  $\text{C}_{25}\text{H}_{17}\text{ClIN}_2$  ( $\text{M}^+ + \text{H}$ ) 507.0125, found 507.0129.

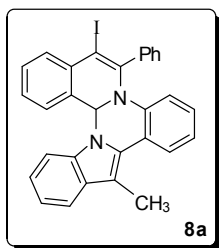

**1-Iodo-8-methyl-2-phenyl-13aH-indolo[1,2-c]isoquinolino[2,1-a]quinazoline (8a):** 64% yield; solid (M.P. = 96-98 °C);  $R_f$  0.76 (hexane/EtOAc= 90/10);  $^1\text{H}$  NMR (300 MHz,  $\text{CDCl}_3$ ):  $\delta$  7.81 (d,  $J = 9.0$  Hz, 1H), 7.75 (d,  $J = 8.3$  Hz, 1H), 7.59 (d,  $J = 8.3$  Hz, 1H), 7.46-7.44 (m, 4H), 7.33 (t,  $J = 8.3$  Hz, 1H), 7.16 (t,  $J = 7.5$  Hz, 2H), 7.01 (t,  $J = 6.8$  Hz, 1H), 6.93 (t,  $J = 7.5$  Hz, 1H), 6.88-6.78 (m, 2H), 6.61-6.56 (m, 2H), 6.10(d,  $J = 8.3$  Hz, 1H), 5.6 (d,  $J = 1.5$  Hz,  $J = 8.3$  Hz, 1H), 2.66 (s, 3H);  $^{13}\text{C}$  NMR (75 MHz,  $\text{CDCl}_3$ ):  $\delta$  144.9, 136.9, 135.9, 135.0, 133.4, 131.5, 130.8, 129.5, 129.0, 128.1, 127.4, 126.2, 125.1, 122.6, 122.2, 121.1, 120.0, 118.9, 117.9, 116.6, 69.0, 70.9, 10.7; IR (KBr):  $\nu_{\text{max}}$  3422, 3056, 2924, 2854, 1647, 1603, 1577, 1462, 1382, 1335, 1260, 1218, 1143, 1073, 1030, 939, 892, 756, 698, 665, 628  $\text{cm}^{-1}$ ; MS (ESI)  $m/z$  537 ( $\text{M}^+ + \text{H}$ ); HRMS calcd. for  $\text{C}_{30}\text{H}_{22}\text{IN}_2$  ( $\text{M}^+ + \text{H}$ ) 537.0828, found 537.0822.

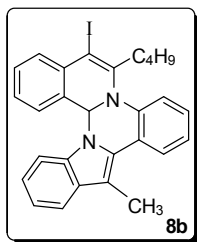

**1-Iodo-8-methyl-2-<sup>n</sup>butyl-13aH-indolo[1,2-c]isoquinolino[2,1-a]quinazoline (8b):** 48% yield; thick liquid;  $R_f$  0.78 (hexane/EtOAc= 90/10);  $^1\text{H}$  NMR (300 MHz,  $\text{CDCl}_3$ ):  $\delta$  7.76-7.73 (m, 2H), 7.71-7.70 (m, 1H), 7.56 (d,  $J = 7.5$  Hz, 1H), 7.22-7.20 (m, 2H), 7.07-7.00 (m, 2H), 6.92-6.98 (m, 2H), 6.59 (d,  $J = 6.8$  Hz, 1H), 6.47 (s, 1H), 6.30 (d,  $J = 7.5$  Hz, 1H), 3.09-2.99 (m, 1H), 2.70 (s, 3H), 2.59-2.50 (m, 1H), 1.90-1.75 (m, 1H), 1.69-1.58 (m, 1H), 1.46-1.35 (m, 2H), 0.92 (t,  $J = 6.8$  Hz, 3H);  $^{13}\text{C}$  NMR (75 MHz,  $\text{CDCl}_3$ ):  $\delta$  146.1, 140.2, 134.1, 132.5, 130.8, 129.4, 128.8, 128.6, 127.7, 126.4, 125.4, 122.7, 121.2, 119.9, 119.0, 118.8, 116.6, 110.8, 108.6, 72.3, 71.1, 37.5, 29.7, 23.0, 13.9, 10.7; IR :  $\nu_{\text{max}}$  3371, 3054, 2955, 2924, 2856, 1692, 1601, 1462, 1380, 1358, 1334, 1260, 1214, 1160, 1129, 1076, 1016, 980, 899, 867, 814, 740, 631, 587, 542, 460  $\text{cm}^{-1}$ ; MS (ESI)  $m/z$  517 ( $\text{M}^+ + \text{H}$ ); HRMS calcd. for  $\text{C}_{28}\text{H}_{26}\text{IN}_2$  ( $\text{M}^+ + \text{H}$ ) 517.1141, found 517.1135.

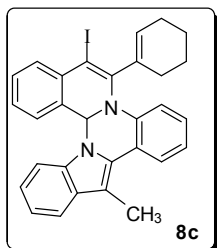

**2-Cyclohexenyl-1-iodo-8-methyl-13aH-indolo[1,2-c]isoquinolino[2,1-a]quinazoline (8c):** 62% yield; thick liquid;  $R_f$  0.75 (hexane/EtOAc= 90/10);  $^1\text{H}$  NMR (300 MHz,  $\text{CDCl}_3$ ):  $\delta$  7.75 (d,  $J = 7.7$  Hz, 1H), 7.63-7.53 (m, 1H), 7.41-7.36 (m, 1H), 7.28-7.18 (m, 4H), 7.00 (t,  $J = 7.7$  Hz, 2H), 6.92 (t,  $J = 7.5$  Hz, 1H), 6.80 (d,  $J = 7.9$  Hz, 1H), 6.62-6.60 (m, 1H), 6.47 (s, 1H), 6.27 (d,  $J = 7.5$  Hz, 1H), 5.29 (s, 1H), 2.69 (s, 3H), 1.66-1.56 (m, 8H);  $^{13}\text{C}$  NMR (75 MHz,  $\text{CDCl}_3$ ):  $\delta$  147.2, 137.1, 135.9, 134.9, 133.5, 130.6, 129.7, 128.5, 128.2, 127.4, 126.9, 125.0, 123.2, 122.4, 121.9, 120.8, 119.8, 118.8, 117.1, 108.6, 70.5, 68.6, 29.0, 25.9, 22.8, 21.8, 10.7; IR :  $\nu_{\text{max}}$  3428, 3052, 2928, 2850, 1646, 1605, 1572, 1468, 1380, 1332, 1261, 1219, 1142, 1076, 1039, 932, 898, 759, 695, 622  $\text{cm}^{-1}$ ; MS (ESI)  $m/z$  541 ( $\text{M}^+ + \text{H}$ ); HRMS calcd. for  $\text{C}_{30}\text{H}_{26}\text{IN}_2$  ( $\text{M}^+ + \text{H}$ ) 541.1141, found 541.1145.

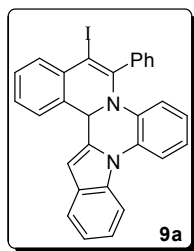

**7-Iodo-6-phenyl-11bH-indolo[2,1-c]isoquinolino[2,1-a]quinoxaline (9a):** 58% yield; thick liquid;  $R_f$  0.81 (hexane/EtOAc= 95/05);  $^1\text{H}$  NMR (300 MHz,  $\text{CDCl}_3$ ):  $\delta$  8.10 (d,  $J = 8.3$  Hz, 1H), 7.85 (t,  $J = 8.3$  Hz, 3H), 7.77 (d,  $J = 7.5$  Hz, 1H), 7.42-7.27 (m, 8H), 7.14 (t,  $J = 6.0$  Hz, 1H), 7.03 (d,  $J = 7.5$  Hz, 1H), 6.86 (t,  $J = 6.0$  Hz, 1H), 6.74-6.71 (m, 1H), 6.44 (d,  $J = 8.3$  Hz, 1H), 5.80 (s, 1H);  $^{13}\text{C}$  NMR (75 MHz,  $\text{CDCl}_3$ ):  $\delta$  143.6, 133.5, 132.7, 132.5, 132.0, 131.1, 129.0, 128.5, 127.9, 127.8, 127.6, 127.1, 125.1, 124.7, 123.9, 122.7, 121.1, 121.3, 120.5, 119.2, 116.8, 116.4, 112.3, 110.8, 102.4, 60.4, 57.9; IR :  $\nu_{\text{max}}$  3382, 3057, 2924, 2854, 1668, 1596, 1498, 1454, 1395, 1361, 1279, 1220, 1111, 1061, 1024, 886, 848, 749, 694, 667, 614, 573, 527, 440  $\text{cm}^{-1}$ ; MS (ESI)  $m/z$  523 ( $\text{M}^+ + \text{H}$ ); HRMS calcd. for  $\text{C}_{29}\text{H}_{20}\text{IN}_2$  ( $\text{M}^+ + \text{H}$ ) 523.0671, found 523.0675.

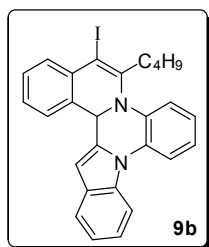

**7-Iodo-6-nbutyl-11bH-indolo[2,1-c]isoquinolino[2,1-a]quinoxaline (9b):** 52% yield; thick liquid;  $R_f$  0.82 (hexane/EtOAc= 95/05);  $^1\text{H}$  NMR (300 MHz,  $\text{CDCl}_3$ ):  $\delta$  7.93 (t,  $J = 7.5$  Hz, 2H), 7.51 (d,  $J = 7.5$  Hz, 1H), 7.45-7.37 (m, 2H), 7.28-7.22 (m, 3H), 7.19-7.13 (m, 5H), 7.0 (d,  $J = 7.5$  Hz, 2H), 5.92 (s, 1H), 5.56 (s, 1H), 2.01 (d,  $J = 6.8$  Hz, 2H), 0.97-0.87 (m, 4H), 0.51 (t,  $J = 7.5$  Hz, 3H);  $^{13}\text{C}$  NMR (75 MHz,  $\text{CDCl}_3$ ):  $\delta$  144.5, 139.4, 133.9, 133.3, 128.6, 126.7, 127.2, 124.7, 123.3, 122.4, 121.2, 120.9, 123.5, 117.7, 116.4, 114.7, 112.2, 110.6, 100.8, 99.5, 57.4, 58.1, 32.0, 29.1, 21.7, 13.5; IR :  $\nu_{\text{max}}$  3061, 2956, 2927, 2865, 1714, 1597, 1496, 1455, 1380, 1223, 1049, 936, 784, 610, 426  $\text{cm}^{-1}$ ; MS (ESI)  $m/z$  503 ( $\text{M}^+ + \text{H}$ ); HRMS calcd. for  $\text{C}_{27}\text{H}_{24}\text{IN}_2$  ( $\text{M}^+ + \text{H}$ ) 503.0984, found 503.0990.

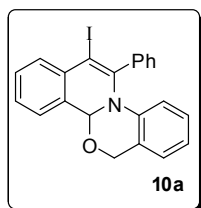

**13-Iodo-12-phenyl-4*bH*,6*H*-benzo[4,5][1,3]oxazino[2,3-*a*]isoquinoline (10a)**: 74% yield; thick liquid;  $R_f$  0.52 (hexane/EtOAc= 90/10);  $^1\text{H}$  NMR (300 MHz,  $\text{CDCl}_3$ ):  $\delta$  7.65 (d,  $J = 7.9$  Hz, 1H), 7.44 (t,  $J = 7.9$  Hz, 1H), 7.31 (t,  $J = 7.9$  Hz, 2H), 7.28-7.26 (m, 3H), 7.12-7.18 (m, 2H), 6.97 (d,  $J = 6.9$  Hz, 1H), 6.91 (t,  $J = 7.9$  Hz, 1H), 6.73 (t,  $J = 6.9$  Hz, 1H), 6.28 (d,  $J = 8.9$  Hz, 1H), 5.98 (s, 1H), 5.85 (d,  $J = 14.9$  Hz, 1H), 5.24 (d,  $J = 14.9$  Hz, 1H);  $^{13}\text{C}$  NMR (75 MHz,  $\text{CDCl}_3$ ):  $\delta$  144.2, 140.6, 139.8, 133.3, 131.4, 130.5, 129.9, 129.6, 128.4, 128.2, 127.8, 126.9, 126.8, 126.1, 125.5, 125.0, 124.4, 123.8, 84.3, 74.4, 67.8; IR :  $\nu_{\text{max}}$  3379, 3060, 2931, 1695, 1652, 1619, 1598, 1498, 1450, 1377, 1337, 1268, 1216, 1156, 1028, 835, 756, 697, 664, 640  $\text{cm}^{-1}$ ; MS (ESI)  $m/z$  438 ( $\text{M}^+ + \text{H}$ ); HRMS calcd. for  $\text{C}_{22}\text{H}_{17}\text{INO}$  ( $\text{M}^+ + \text{H}$ ) 438.0355, found 438.0349.

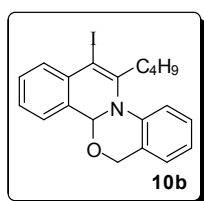

**13-Iodo-12-<sup>n</sup>butyl-4*bH*,6*H*-benzo[4,5][1,3]oxazino[2,3-*a*]isoquinoline (10b)**: 63% yield; thick liquid;  $R_f$  0.51 (hexane/EtOAc= 90/10);  $^1\text{H}$  NMR (300 MHz,  $\text{CDCl}_3$ ):  $\delta$  7.63 (d,  $J = 7.5$  Hz, 1H), 7.51 (t,  $J = 7.5$  Hz, 1H), 7.46 (t,  $J = 7.5$  Hz, 1H), 7.17 (d,  $J = 7.3$  Hz, 1H), 7.10 (t,  $J = 8.8$  Hz, 1H), 7.01 (d,  $J = 6.4$  Hz, 1H), 6.91 (d,  $J = 8.1$  Hz, 1H), 6.20 (s, 1H), 5.59 (s, 1H), 5.45 (d,  $J = 14.6$  Hz, 1H), 4.97 (d,  $J = 14.6$  Hz, 1H), 2.16 (t,  $J = 6.4$  Hz, 1H), 2.10 (t,  $J = 7.0$  Hz, 1H), 1.13-1.01 (m, 2H), 0.8-0.9 (m, 2H), 0.56 (t,  $J = 7.3$  Hz, 3H);  $^{13}\text{C}$  NMR (75 MHz,  $\text{CDCl}_3$ ):  $\delta$  144.5, 141.2, 133.5, 130.9, 129.5, 129.3, 126.8, 126.1, 125.2, 125.7, 84.2, 74.2, 67.5, 36.5, 29.7, 22.1, 13.6; IR :  $\nu_{\text{max}}$  3444, 2955, 2925, 2856, 1711, 1656, 1584, 1553, 1486, 1458, 1378, 1293, 1242, 1202, 1130, 1019, 916, 758  $\text{cm}^{-1}$ ; MS (ESI)  $m/z$  418 ( $\text{M}^+ + \text{H}$ ); HRMS calcd. for  $\text{C}_{20}\text{H}_{21}\text{INO}$  ( $\text{M}^+ + \text{H}$ ) 418.0668, found 418.0662.

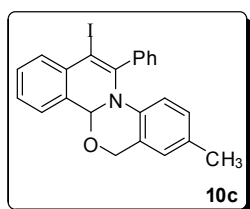

**13-Iodo-8-methyl-12-phenyl-4*bH*,6*H*-benzo[4,5][1,3]oxazino[2,3-*a*]isoquinoline (10c)**: 66% yield; yellow solid (M.P. = 136-138°C) thick liquid;  $R_f$  0.50 (hexane/EtOAc= 90/10);  $^1\text{H}$  NMR (300 MHz,  $\text{CDCl}_3$ ):  $\delta$  7.64 (d,  $J = 7.7$  Hz, 1H), 7.38-7.46 (m, 2H), 7.29-7.26 (m, 4H), 7.19-7.13 (m, 2H), 6.77 (s, 1H), 6.53 (d,  $J = 8.1$  Hz, 1H), 6.17 (d,  $J = 8.3$  Hz, 1H), 5.93 (s, 1H), 5.21 (d,  $J = 15.1$  Hz,

1H), 5.04 (d,  $J = 14.9$  Hz, 1H), 2.19 (s, 3H);  $^{13}\text{C}$  NMR (75 MHz,  $\text{CDCl}_3$ ):  $\delta$  144.8, 140.2, 138.4, 133.8, 132.4, 131.8, 130.6, 129.8, 129.1, 128.6, 128.3, 127.9, 126.8, 126.2, 125.2, 124.9, 123.5, 84.5, 73.8, 67.9, 14.2; IR (KBr):  $\nu_{\text{max}}$  3435, 3058, 2923, 1698, 1652, 1620, 1496, 1446, 1377, 1338, 1276, 1217, 1156, 1068, 1029, 880, 812, 759, 697, 666, 637, 528  $\text{cm}^{-1}$ ; MS (ESI)  $m/z$  452 ( $\text{M}^+ + \text{H}$ ); HRMS calcd. for  $\text{C}_{23}\text{H}_{19}\text{INO}$  ( $\text{M}^+ + \text{H}$ ) 452.0511, found 452.0516.

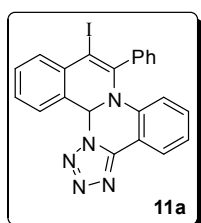

**10-Iodo-9-phenyl-14bH-isoquinolino[2,1-a]tetrazo[1,5-c]quinazoline (11a):** 62% yield; solid (M.P. = 212-214 °C);  $R_f$  0.28 (hexane/EtOAc= 60/40);  $^1\text{H}$  NMR (300 MHz,  $\text{CDCl}_3$ ):  $\delta$  8.01 (d,  $J = 7.6$  Hz, 1H), 7.92 (d,  $J = 3.8$  Hz, 1H), 7.71 (d,  $J = 7.8$  Hz, 1H), 7.46-7.44 (m, 4H), 7.36 (d,  $J = 3.8$  Hz, 1H), 7.21 (s, 1H), 7.06 (t,  $J = 8.1$  Hz, 1H), 7.46-7.44 (m, 4H), 7.36 (d,  $J = 3.8$  Hz, 1H), 7.21 (s, 1H), 7.06 (t,  $J = 8.1$  Hz, 1H), 6.93 (t,  $J = 7.3$  Hz, 1H), 6.55 (d,  $J = 8.3$  Hz, 1H), 6.50 (d,  $J = 7.6$  Hz, 1H);  $^{13}\text{C}$  NMR (125 MHz,  $\text{DMSO } d_6$ ):  $\delta$  154.8, 147.6, 139.1, 137.1, 136.8, 131.6, 131.2, 130.6, 130.3, 129.8, 129.4, 128.6, 127.9, 127.7, 127.1, 124.9, 124.2, 120.9, 117.4, 70.5, 54.8; IR (KBr):  $\nu_{\text{max}}$  3044, 2920, 2852, 1648, 1575, 1518, 1482, 1431, 1382, 1349, 1290, 1248, 1234, 1138, 1090, 1062, 974, 885, 814, 698, 575  $\text{cm}^{-1}$ ; MS (ESI)  $m/z$  476 ( $\text{M}^+ + \text{H}$ ); HRMS calcd. for  $\text{C}_{22}\text{H}_{15}\text{IN}_5$  ( $\text{M}^+ + \text{H}$ ) 476.0372, found 476.0378.

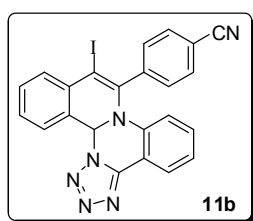

**4-(10-Iodo-14bH-isoquinolino[2,1-a]tetrazolo[1,5-c]quinazolin-9-yl)benzonitrile (11b):** 72% yield; solid (M.P. = 172-174 °C);  $R_f$  0.29 (hexane/EtOAc= 60/40);  $^1\text{H}$  NMR (300 MHz,  $\text{CDCl}_3$ ):  $\delta$  7.93 (d,  $J = 7.9$  Hz, 1H), 7.65 (d,  $J = 8.5$  Hz, 1H), 7.51-7.48 (m, 3H), 7.39-7.36 (m, 4H), 7.28 (d,  $J = 6.7$  Hz, 1H), 6.82 (d,  $J = 7.0$  Hz, 2H), 6.60 (s, 1H);  $^{13}\text{C}$  NMR (75 MHz,  $\text{CDCl}_3$ ):  $\delta$  155.3, 147.9, 139.2, 138.9, 138.1, 136.6, 131.9, 131.5, 130.8, 130.6, 130.3, 129.7, 129.1, 128.5, 128.1, 127.6, 124.6, 120.9, 117.4, 70.3, 59.8; IR (KBr):  $\nu_{\text{max}}$  3042, 2928, 2850, 2254, 1651, 1576, 1527, 1476, 1380, 1356, 1294, 1138, 1097, 1062, 974, 876, 732, 695, 468  $\text{cm}^{-1}$ ; MS (ESI)  $m/z$  501 ( $\text{M}^+ + \text{H}$ ); HRMS calcd. for  $\text{C}_{23}\text{H}_{14}\text{IN}_6$  ( $\text{M}^+ + \text{H}$ ) 501.0325, found 501.0329.

## 5. Diversification of Products

The scope and synthetic utility of this newly developed EIBC approach was enhanced by diversifying branch-1 via metal catalyzed cross-coupling reactions. For instance, compound **1a** was subjected to Sonogashira, Stille, Heck, Suzuki, Kumada and Negishi cross-coupling reaction conditions to afford products **1aa**, **1ab**, **1ac**, **1ad**, **1ae** and **1af**; respectively, in moderate to good yields.

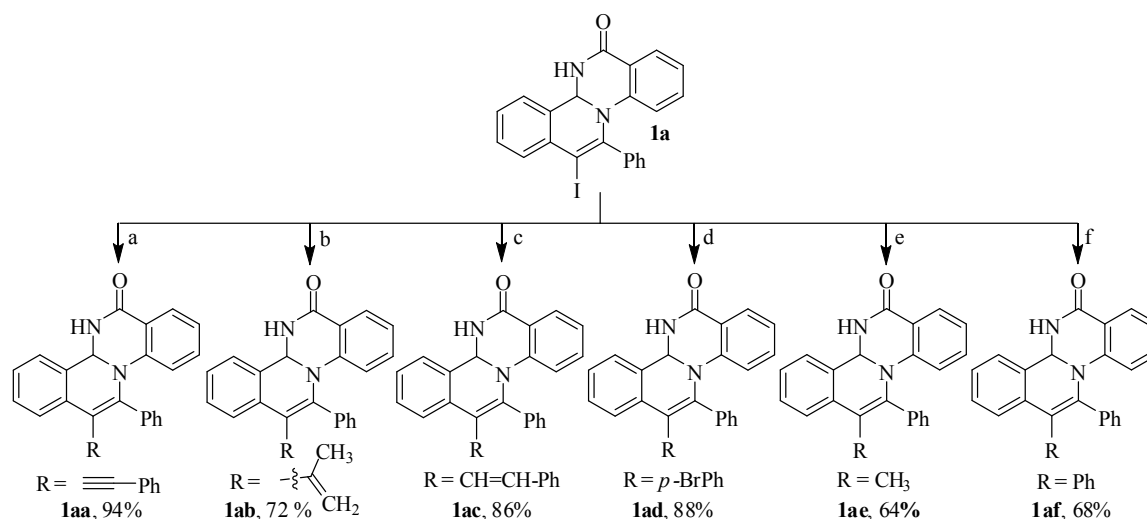

### a) Sonogashira coupling (**1a** → **1aa**):

To a 25 mL round bottom flask a solution of **1a** (0.050 g, 1 eq) in DMF (2.5 mL) was added Et<sub>3</sub>N (5 eq) and purged with dry nitrogen for 30 minutes. Catalysts PdCl<sub>2</sub>(PPh<sub>3</sub>)<sub>2</sub> (0.004 g, 0.05 eq) and CuI (0.001 g, 0.05 eq) were introduced into the flask under nitrogen atmosphere at room temperature. To the above flask phenyl acetylene (0.012 g, 1.1 eq) was added drop wise. The reaction mixture was heated to 80 °C and stirred for 12 h. The reaction mixture was cooled to room temperature and filtered through a short SiO<sub>2</sub> pad followed by addition of water to remove DMF and extracted with DCM (10 mL x 3). Work up and purification by column chromatography using hexane/ethyl acetate (70/30) as eluent to afford **1aa** (94%) as a pure product.

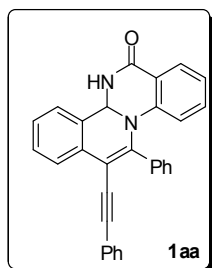



**12-Phenyl-13-(phenylethynyl)-4bH-isoquinolino[2,1-a]quinazolin-6(5H)-one (1aa):** 94% yield; solid (M.P. = 106-108 °C);  $R_f$  0.31 (hexane/EtOAc= 70/30);  $^1\text{H}$  NMR (300 MHz,  $\text{CDCl}_3$ ):  $\delta$  8.03-7.99 (m, 1H), 7.83 (d,  $J$  = 8.3 Hz, 1H), 7.56-7.47 (m, 5H), 7.39-7.30 (m, 8H), 7.07-7.01 (m, 2H), 6.49 (s, 1H), 6.38-6.36 (m, 1H), 6.27 (s, 1H);  $^{13}\text{C}$  NMR (75 MHz,  $\text{CDCl}_3$ ):  $\delta$  163.3, 145.4, 142.8, 134.5, 133.2, 132.4, 132.2, 131.5, 130.8, 130.0, 129.4, 129.1, 128.9, 128.5, 128.3, 128.2, 128.0, 127.6, 124.8, 123.7, 123.2, 94.5, 86.4, 67.3; IR (KBr):  $\nu_{\text{max}}$  3199, 3055, 2923, 2196, 1672, 1599, 1552, 1517, 1480, 1349, 1306, 1160, 1071, 1026, 908, 756, 727, 692, 641, 542,  $430\text{cm}^{-1}$ ; MS (ESI)  $m/z$  375 ( $\text{M}^+$  + H); HRMS calcd. for  $\text{C}_{26}\text{H}_{19}\text{N}_2\text{O}$  ( $\text{M}^+$  + H) 375.1497, found 375.1491.

**b) Stille coupling (1a  $\rightarrow$  1ab):**

To a 25 mL round bottom flask a solution of **1a** (0.060 g, 1 eq) in DMF (2.5 mL) was added tri  $n$  butyl(prop-1-en-2-yl) stannane (54 mg, 1.2 eq),  $\text{Pd}(\text{PPh}_3)_4$  (6mg, 0.04 eq),  $\text{CuI}$  (1.2 mg, 0.05 eq),  $\text{CsF}$  (0.020 g, 2 eq) and purged with dry nitrogen for 30 minutes. The reaction mixture was heated to 100 °C and stirred for 8 hr. The reaction mixture was cooled to room temperature and filtered through a short  $\text{SiO}_2$  pad followed by addition of water to remove DMF and extracted with DCM (10 mL x 3). Work up and purification by column chromatography by using hexane/ethyl acetate (70/30) as eluent to afford **1ab** (72%) as a pure product.

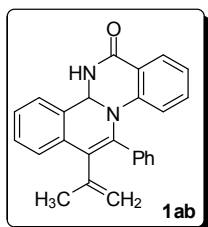

**12-Phenyl-13-(prop-1-en-2-yl)-4bH-isoquinolino[2,1-a]quinazolin-6(5H)-one (1ab):** 72% yield; thick liquid ;  $R_f$  0.32 (hexane/EtOAc= 70/03);  $^1\text{H}$  NMR (300 MHz,  $\text{CDCl}_3$ ):  $\delta$  7.95 (d,  $J$  = 9.1 Hz, 1H), 7.46-7.30 (m, 9H), 7.04-6.93 (m, 2H), 6.42 (d,  $J$  = 8.3 Hz, 1H), 6.26 (s, 1H), 6.15 (s, 1H), 5.32 (s, 1H), 5.04 (s, 1H), 1.68 (s, 3H);  $^{13}\text{C}$  NMR (75 MHz,  $\text{CDCl}_3$ ):  $\delta$  163.6, 143.8, 140.4, 136.6, 133.5, 133.1, 129.4, 129.1, 128.9, 128.8, 128.7, 128.6, 128.4, 128.3, 128.1, 127.8, 126.6, 124.2, 123.8, 121.2, 119.6, 117.7, 67.6, 24.1; IR :  $\nu_{\text{max}}$  3192, 3054, 2928, 1674, 1594, 1559, 1502, 1480, 1348, 1306, 1164, 1072, 1024, 904, 751, 696, 646, 542,  $434\text{cm}^{-1}$ ; MS (ESI)  $m/z$  365 ( $\text{M}^+$  + H); HRMS calcd. for  $\text{C}_{25}\text{H}_{21}\text{N}_2\text{O}$  ( $\text{M}^+$  + H) 365.1654, found 365.1661.

**c) Heck coupling (1a  $\rightarrow$  1ac):**

To a 25 mL round bottom flask a solution of **1a** (0.050 g, 1 eq) in DMF(2.5 mL) was added styrene (.0042 g, 3 eq), Pd(OAc)<sub>2</sub> (2 mg, 0.05 eq), PPh<sub>3</sub> (0.006 g, 0.1 eq), Bu<sub>4</sub>NBr (0.036 g, 1 eq), Na<sub>2</sub>CO<sub>3</sub> (0.035 g, 3 eq) and purged with dry nitrogen for 30 minutes. The reaction mixture was heated to 100 °C and stirred for 8 hr. The reaction mixture was cooled to room temperature and filtered through a short SiO<sub>2</sub> pad followed by addition of water to remove DMF and extracted with DCM (10 mL x 3). Work up and purification by column chromatography by using hexane/ethyl acetate (70/30) as eluent to afford **1ac** (86%) as a pure product.

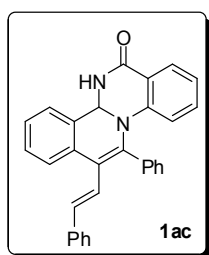

**12-Phenyl-13-(styryl)-4bH-isoquinolino[2,1-a]quinazolin-6(5H)-one (1ac):** 86% yield; solid (M.P. = 208-206 °C); R<sub>f</sub> 0.31 (hexane/EtOAc= 70/30); <sup>1</sup>H NMR (300 MHz, CDCl<sub>3</sub>): δ 7.96-7.93 (m, 1H), 7.70-7.63 (m, 4H), 7.55-7.52 (m, 1H), 7.49-7.43 (m, 4H), 7.39-7.36 (m, 2H), 7.33-7.23 (m, 6H), 7.02-6.99 (m, 2H), 6.39-6.36 (m, 2H), 6.20 (s, 1H); <sup>13</sup>C NMR (75 MHz, CDCl<sub>3</sub>): δ 163.1, 145.2, 142.6, 134.9, 134.3, 133.0, 132.2, 131.9, 131.7, 131.3, 130.6, 129.8, 129.2, 128.9, 128.7, 128.3, 128.1, 127.9, 127.8, 127.4, 126.5, 126.2, 125.9, 125.1, 124.6, 123.5, 123.0, 67.1 ; IR (KBr): ν<sub>max</sub> 3190, 3052, 2928, 2198, 1678, 1590, 1558, 1512, 1484, 1345, 1307, 1162, 1074, 1025, 902, 758, 720, 696, 646, 543, 435 cm<sup>-1</sup>; MS (ESI) *m/z* 427 (M<sup>+</sup> + H); HRMS calcd. for C<sub>30</sub>H<sub>23</sub>N<sub>2</sub>O (M<sup>+</sup> + H) 427.1810, found 427.1815.

#### d) Suzuki coupling (**1a** → **1ad**):

To a 25 mL round bottom flask a solution of **1a** (0.050 g, 1 eq) in DMF(2.5 mL) and H<sub>2</sub>O (0.5 mL) was added K<sub>2</sub>CO<sub>3</sub> (0.031 g, 2 eq) and purged with dry nitrogen for 30 minutes. To the above flask *p*-bromobenzene boronic acid (0.033 g, 1.5 eq) and PdCl<sub>2</sub>(PPh<sub>3</sub>)<sub>2</sub> (0.008 g, 0.1 eq) were introduced under nitrogen atmosphere at room temperature. The reaction mixture was heated to 100 °C and stirred for 8 hr. The reaction mixture was cooled to room temperature and filtered through a short SiO<sub>2</sub> pad followed by addition of water to remove DMF and extracted with DCM (10 mL x 3). Work up and purification by column chromatography using hexane/ethyl acetate (70/30) as eluent to afford **1ad** (88%) as a pure product.

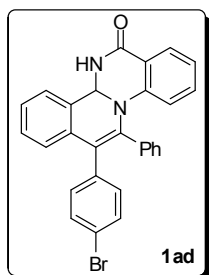

**12-Phenyl-13-(4-bromophenyl)-4bH-isoquinolino[2,1-a]quinazolin-6(5H)-one (1ad):** 88% yield; thick liquid;  $R_f$  0.30 (hexane/EtOAc= 70/30);  $^1\text{H}$  NMR (300 MHz,  $\text{CDCl}_3$ ):  $\delta$  8.02-7.99 (m, 1H), 7.83 (d,  $J = 8.3$  Hz, 1H), 7.55-7.44 (m, 5H), 7.39-7.30 (m, 7H), 7.06-7.02 (m, 2H), 6.49 (s, 1H), 6.38-6.35 (m, 1H), 6.27 (s, 1H);  $^{13}\text{C}$  NMR (75 MHz,  $\text{CDCl}_3$ ):  $\delta$  163.5, 143.7, 138.5, 136.6, 134.7, 133.5, 133.3, 132.1, 131.8, 131.7, 131.0, 130.1, 128.6, 128.3, 128.1, 127.9, 127.4, 126.9, 126.6, 124.5, 67.7 ; IR : 3182, 3055, 2927, 1679, 1600, 1519, 1480, 1356, 1317, 1254, 1163, 1123, 1020, 918, 800, 754, 720, 698, 597, 549 $v_{\text{max}}$   $\text{cm}^{-1}$ ; MS (ESI)  $m/z$  479 ( $\text{M}^+ + \text{H}$ ); HRMS calcd. for  $\text{C}_{28}\text{H}_{20}\text{BrN}_2\text{O}$  ( $\text{M}^+ + \text{H}$ ) 479.0759, found 479.0765.

#### e) Kumada coupling (1a $\rightarrow$ 1ae):

To a 25 mL round bottom flask a solution of **1a** (0.050 g, 1 eq) in THF (3 ml) was added  $\text{Ni}(\text{PPh}_3)_2\text{Cl}_2$  (0.008 g, 0.1 eq) and purged with dry nitrogen for 30 minutes. To the above flask  $\text{CH}_3\text{MgI}$  (0.055 g, 3 eq) was introduced under nitrogen atmosphere at room temperature. The reaction mixture was warmed to 80  $^\circ\text{C}$  and stirred for 12 h. The reaction mixture was cooled to room temperature and filtered through a short  $\text{SiO}_2$  pad and the filtrate was concentrated. The residue was purified by column chromatography by using hexane/ethyl acetate (70/30) as eluent to afford **1ae** (64%) as a pure product.

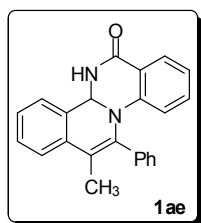

**12-Phenyl-13-methyl-4bH-isoquinolino[2,1-a]quinazolin-6(5H)-one (1ae):** 64% yield; solid (M.P. = 178-180  $^\circ\text{C}$ );  $R_f$  0.30 (hexane/EtOAc= 70/30);  $^1\text{H}$  NMR (300 MHz,  $\text{CDCl}_3$ ):  $\delta$  7.96-7.94 (m, 1H), 7.64 (d,  $J = 7.8$  Hz, 1H), 7.50 (d,  $J = 9.0$  Hz, 2H), 7.35-7.29 (m, 5H), 7.25-7.23 (m, 1H), 7.00-7.01 (m, 2H), 6.39-6.37 (m, 1H), 6.18 (s, 1H), 1.59 (s, 3H);  $^{13}\text{C}$  NMR (125MHz,  $\text{DMSO } d_6$ ):  $\delta$  161.6, 144.1, 141.8, 143.8, 134.8, 132.8, 130.8, 130.0, 129.0, 128.1, 127.1, 125.7, 125.5, 123.3, 119.7,

116.4, 66.9, 30.6 ; IR (KBr):  $\nu_{max}$  3445, 3293, 3146, 2926, 2853, 1634, 1494, 1442, 748  $\text{cm}^{-1}$ ; MS (ESI)  $m/z$  339 ( $\text{M}^+ + \text{H}$ ); HRMS calcd. for  $\text{C}_{23}\text{H}_{19}\text{N}_2\text{O}$  ( $\text{M}^+ + \text{H}$ ) 339.1497, found 339.1452.

#### f) Negishi coupling (**1a** → **1af**):

To a 25 mL round bottom flask a solution of **1a** (0.050 g, 1 eq) in DMF (2.5 ml) was added  $\text{Pd}(\text{OAc})_2$  (2 mg, 0.05 eq),  $\text{Bu}_4\text{NBr}$  (0.036 g, 1 eq) purged with dry nitrogen for 30 minutes. To the above flask benzene  $\text{PhZnCl}$  (0.023 g, 1.2 eq) was introduced under nitrogen atmosphere at room temperature. The reaction mixture was stirred at rt for 12 hrs then the reaction mixture was cooled to room temperature and filtered through a short  $\text{SiO}_2$  pad followed by the addition of water to remove DMF and extracted with DCM (10 mL x 3). Work up and purification by column chromatography column chromatography by using hexane/ethyl acetate (70/30) as eluent to afford **1af** (68%) as a pure product.

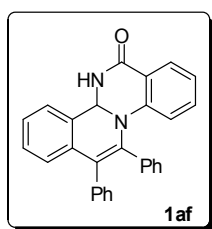

**12,13-Diphenyl-4bH-isoquinolino[2,1-a]quinazolin-6(5H)-one (1af)**: 68% yield; thick liquid;  $R_f$  0.30 (hexane/EtOAc= 70/30);  $^1\text{H}$  NMR (300 MHz,  $\text{CDCl}_3$ ):  $\delta$  7.95 (d,  $J = 7.7$  Hz, 1H), 7.42 (t,  $J = 6.9$  Hz, 2H), 7.31-7.19 (m, 7H), 7.14-7.08 (m, 3H), 7.05-6.97 (m, 4H), 6.92 (t,  $J = 7.5$  Hz, 1H), 6.39 (d,  $J = 7.4$  Hz, 1H), 6.26 (s, 1H);  $^{13}\text{C}$  NMR (75 MHz,  $\text{CDCl}_3$ ):  $\delta$  170.7, 163.7, 143.9, 138.7, 136.9, 134.9, 133.5, 132.3, 132.0, 131.9, 131.2, 130.3, 130.9, 128.8, 128.5, 128.2, 128.0, 127.8, 127.6, 127.2, 126.8, 124.7, 122.0, 67.8; IR :  $\nu_{max}$  3180, 3053, 2923, 1673, 1602, 1516, 1480, 1403, 1358, 1310, 1255, 1161, 1122, 1023, 910, 801, 756, 727, 699, 644, 594, 541, 424 $\text{cm}^{-1}$ ; MS (ESI)  $m/z$  401 ( $\text{M}^+ + \text{H}$ ); HRMS calcd. for  $\text{C}_{28}\text{H}_{21}\text{N}_2\text{O}$  ( $\text{M}^+ + \text{H}$ ) 401.1654, found 401.1662.

## 6. Undesired Products Obtained During Optimization Studies and Characterization Data:

The following undesired products were observed in some cases during optimization studies. In case of SBA-1 prolonging the reaction for 8 hrs, **1a'** was observed as a major product. In case of SBA-2 under the reaction condition-4, **2a'** was the major product. In case of SBA-7 under the reaction condition-1, **7a'** was the major product. In case of SBA-9 under the reaction condition-1, intermediate dihydroindoloquinoline **9a'** was the major product.

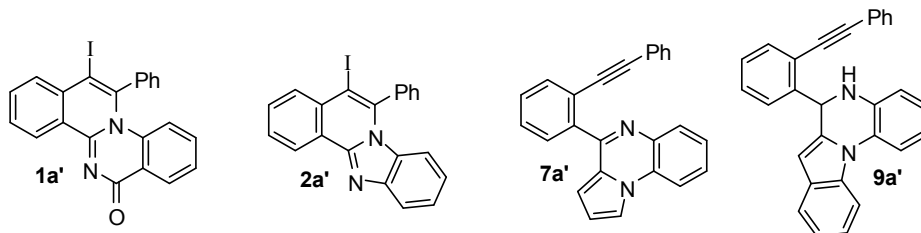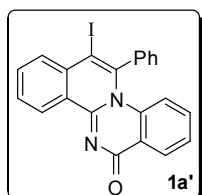

**13-Iodo-12-phenyl-6H-isoquinolino[2,1-a]quinazolin-6-one (1a')**: 76% yield; solid (M.P. = 94-96 °C);  $R_f$  0.24 (hexane/EtOAc= 70/30);  $^1\text{H}$  NMR (300 MHz,  $\text{CDCl}_3$ ):  $\delta$  7.93 (dd,  $J = 1.5$  Hz,  $J = 8.3$ , 1H), 7.70-7.65 (m, 2H), 7.44-7.37 (m, 5H), 7.31 (dd,  $J = 3.7$  Hz, 2H), 7.02 (t,  $J = 9.0$  Hz, 1H), 6.85 (t,  $J = 7.5$  Hz, 2H);  $^{13}\text{C}$  NMR (75 MHz,  $\text{CDCl}_3$ ):  $\delta$  167.9, 154.1, 151.2, 138.3, 136.8, 133.5, 132.3, 131.5, 130.6, 130.1, 129.3, 128.7, 127.9, 127.5, 127.1, 126.8, 126.4, 122.1, 117.8, 67.9 ; IR (KBr):  $\nu_{\text{max}}$  2925, 1672, 1628, 1554, 1518, 1474, 1336, 1162, 1130, 1062, 1045, 806, 729, 686, 542  $\text{cm}^{-1}$ ; MS (ESI)  $m/z$  449 ( $\text{M}^+ + \text{H}$ ); HRMS calcd. for  $\text{C}_{22}\text{H}_{14}\text{IN}_2\text{O}$  ( $\text{M}^+ + \text{H}$ ) 449.0151, found 449.0158.

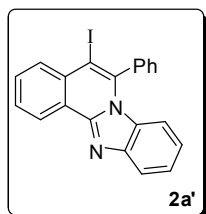

**5-Iodo-6-phenylbenzo[4,5]imidazo[2,1-a]isoquinoline (2a')**: 71% yield; solid (M.P. = 194-196 °C);  $R_f$  0.52 (hexane/EtOAc= 90/10);  $^1\text{H}$  NMR (300 MHz,  $\text{CDCl}_3$ ):  $\delta$  8.91-8.88 (m, 1H), 8.20-8.17 (m, 1H), 7.94 (d,  $J = 8.1$  Hz, 1H), 7.78-7.69 (m, 5H), 7.49-7.46 (m, 2H), 7.37 (t,  $J = 7.3$  Hz, 1H), 6.95 (t,  $J = 7.5$  Hz, 1H), 5.83 (d,  $J = 8.5$  Hz, 1H);  $^{13}\text{C}$  NMR (75 MHz,  $\text{CDCl}_3$ ):  $\delta$  147.4, 143.6, 139.6, 138.4, 132.4, 130.9, 130.3, 129.8, 129.5, 128.6, 125.0, 124.5, 122.4, 121.6, 119.5, 113.9, 86.9; IR (KBr):  $\nu_{\text{max}}$  2928, 2854, 1726, 1631, 1593, 1452, 1372, 1232, 1150, 1118, 914, 740, 672, 568  $\text{cm}^{-1}$ ; MS (ESI)  $m/z$  421 ( $\text{M}^+ + \text{H}$ ); HRMS calcd. for  $\text{C}_{21}\text{H}_{14}\text{N}_2\text{I}$  ( $\text{M}^+ + \text{H}$ ) 421.0202, found 421.0212.

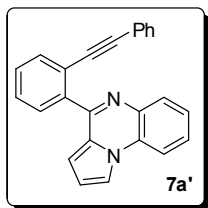

**4-[(2-phenyl-1-ethynyl)phenyl]pyrrolo[1,2-a]quinoxaline (7a')**: 58% yield; thick liquid;  $R_f$  0.48 (hexane/EtOAc= 95/05);  $^1\text{H}$  NMR (300 MHz,  $\text{CDCl}_3$ ):  $\delta$  8.08 (dd,  $J = 1.4$  Hz,  $J = 6.7$ , 1H), 8.01-8.00 (m, 1H), 7.91 (d,  $J = 8.2$  Hz, 1H), 7.73-7.70 (m, 2H), 7.56-7.53 (m, 1H), 7.50-7.46 (m, 3H), 7.19-7.12 (m, 3H), 7.05-7.04 (m, 2H), 6.88-6.87 (m, 1H), 6.79-6.78 (m, 1H);  $^{13}\text{C}$  NMR (75 MHz,  $\text{CDCl}_3$ ):  $\delta$  154.2, 140.1, 136.0, 132.9, 131.3, 130.2, 129.2, 128.9, 128.2, 127.9, 127.6, 127.3, 125.8, 125.2, 123.1, 122.5, 114.2, 113.7, 113.9, 109.0; IR (KBr):  $\nu_{\text{max}}$  3050, 2926, 2858, 1690, 1605, 1564, 1475, 1346, 1284, 1205, 1108, 1046, 768, 698, 618, 560, 445  $\text{cm}^{-1}$ ; MS (ESI)  $m/z$  345 ( $\text{M}^+ + \text{H}$ ); HRMS calcd. for  $\text{C}_{25}\text{H}_{17}\text{N}_2$  ( $\text{M}^+ + \text{H}$ ) 345.1392 found 345.1385.

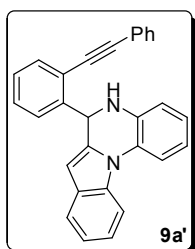

**6-[(2-phenyl-1-ethynyl)phenyl]-5,6-dihydroindolo[1,2-a]quinoxaline (9a')**: 65% yield; thick liquid;  $R_f$  0.78 (hexane/EtOAc= 95/05);  $^1\text{H}$  NMR (300 MHz,  $\text{CDCl}_3$ ):  $\delta$  8.07 (d,  $J = 8.3$  Hz, 1H), 7.82 (d,  $J = 9.1$  Hz, 1H), 7.74 (d,  $J = 7.5$  Hz, 1H), 7.33 (t,  $J = 8.3$  Hz, 2H), 7.23-7.13 (m, 3H), 7.07-7.02 (m, 1H), 6.93-6.84 (m, 4H), 6.77 (s, 1H), 6.66 (s, 1H), 6.52 (d,  $J = 9.1$  Hz, 1H), 6.42 (s, 1H);  $^{13}\text{C}$  NMR (75 MHz,  $\text{CDCl}_3$ ):  $\delta$  143.5, 133.8, 133.4, 132.4, 131.9, 129.8, 128.9, 128.5, 128.1, 127.9, 127.7, 126.1, 125.0, 124.6, 123.8, 122.6, 121.1, 120.4, 119.1, 118.5, 116.7, 116.3, 112.2, 102.3, 57.8; IR (KBr):  $\nu_{\text{max}}$  3384, 2924, 2852, 1596, 1490, 1451, 1392, 1274, 1224, 1066, 1022, 840, 698, 664, 615, 526  $\text{cm}^{-1}$ ; MS (ESI)  $m/z$  397 ( $\text{M}^+ + \text{H}$ ); HRMS calcd. for  $\text{C}_{29}\text{H}_{21}\text{N}_2$  ( $\text{M}^+ + \text{H}$ ) 397.1705, found 397.1712.

## 7. Enantioselective Experiment and HPLC Chromatograms

The EIBC approach could be made enantioselective under the catalysis of chiral Brønsted acid with the realm of iodine cyclization. To our satisfaction, when substrate 2-(phenylethynyl) benzaldehyde **Xa** treated with 2-amino-5-bromobenzamide **1(I)** in the presence of 5 mol% (*S*)-3,3'-

bis (9-anthracenyl)-1,1'-binaphthyl-2,2'-diylhydrogenphosphate in DCE followed by addition of 1.3 eq  $K_2CO_3$  and 1.2 eq  $I_2$ , the product **1b** was obtained in 60% yield with 90% ee.

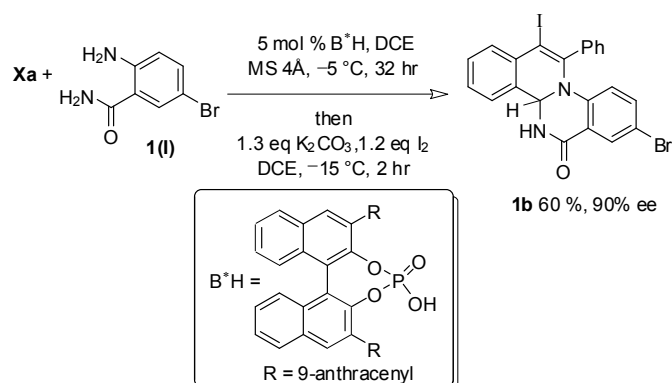

Experimental procedure: To a screw-cap 2.5 ml vial containing stir bar, were added scaffold building agent **1 (I)** (0.030 g, 1 eq) and 2-ethynylbenzaldehyde **Xa** (1 eq) in DCE (0.09 M) followed by the addition of 4A° MS and 5-mol % (*S*)-3,3'-bis(9-anthracenyl)-1,1'-binaphthyl-2,2'-diylhydrogenphosphate<sup>1</sup>. The reaction vial was fitted with a cap, evacuated and filled with nitrogen and stirred at  $-5\text{ }^\circ\text{C}$  for 32 hrs. After the prescribed time, the reaction mixture was cooled to  $-15\text{ }^\circ\text{C}$  followed by the addition of  $K_2CO_3$  (1.3 eq) and iodine (1.2 eq) in a sequential manner and allowed to stir for 2 hrs. The reaction mixture was quenched by the addition of aq. sodium thiosulphate solution, diluted with 5 mL water and extracted with DCM (10 mL x 3). Work up and purification by column chromatography using MeOH/DCM as an eluent to afford analytically pure compound in 60% yield with 90% ee. **HPLC conditions:** OD-H column, n-hexane/2-propanol = 80/20, flow rate 0.8 mL/min;  $\lambda = 360\text{ nm}$ ;  $t_{\text{minor}} = 9.12$ ,  $t_{\text{major}} = 12.64$ ;  $[\alpha]_D^{28.4} = -156.8$  ( $c = 0.25$ ,  $CHCl_3$ )

<sup>1</sup> J. Itoh, K. Fuchibe, T. Akiyama, *Angew. Chem., Int. Ed.*, **2006**, *45*, 4796–4798.

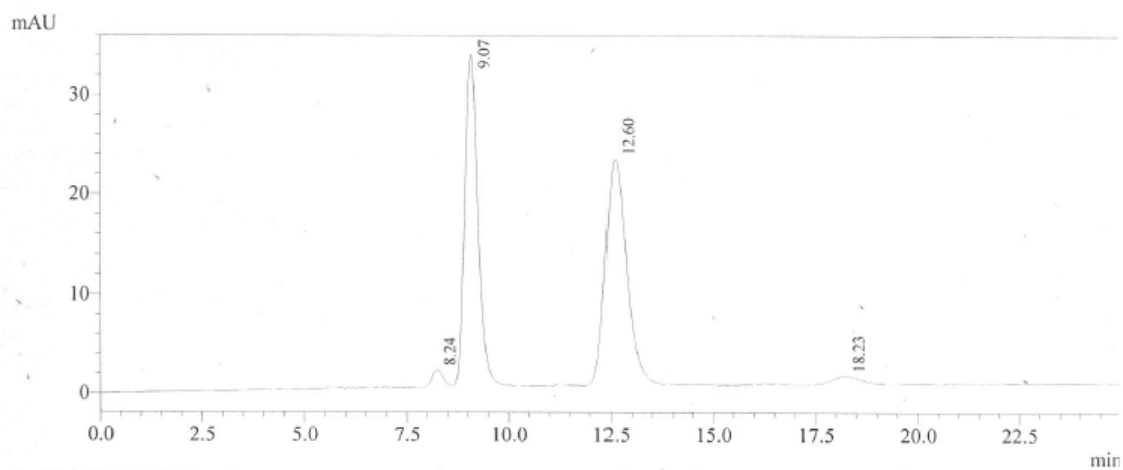

1 PDA Multi 3 / 360nm 3nm

PDA Ch3 360nm 3nm

| Peak# | Ret. Time | Area    | Area % |
|-------|-----------|---------|--------|
| 1     | 8.24      | 32362   | 2.00   |
| 2     | 9.07      | 752373  | 46.39  |
| 3     | 12.60     | 800289  | 49.35  |
| 4     | 18.23     | 36770   | 2.27   |
| Total |           | 1621795 | 100.00 |

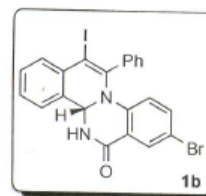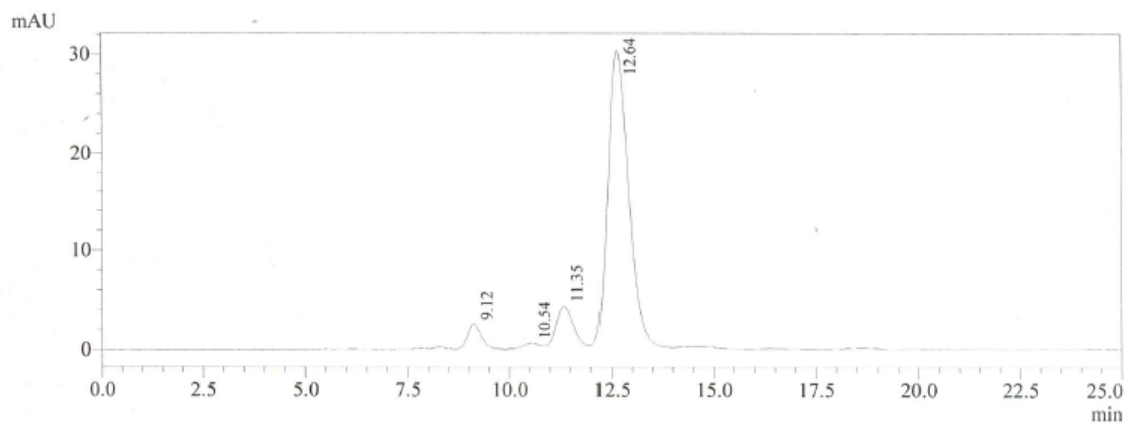

1 PDA Multi 2 / 360nm 5nm

PDA Ch2 360nm 5nm

| Peak# | Ret. Time | Area    | Area % |
|-------|-----------|---------|--------|
| 1     | 9.12      | 56771   | 4.52   |
| 2     | 10.54     | 13880   | 1.11   |
| 3     | 11.35     | 124908  | 9.95   |
| 4     | 12.64     | 1060073 | 84.43  |
| Total |           | 1255632 | 100.00 |



## 8. Anti mycobacterial activity

Tuberculosis is a foremost destroyer worldwide causing an estimated 1.4 million deaths per year.<sup>2</sup> The re-emergence of TB as a public health threat emphasizes a need to develop novel antimycobacterial agents with lesser toxicity. Some of poly heterocyclic compounds resulted through EIBC resembles structures of reported anti-tubercular agents.<sup>3</sup> Therefore, compounds accessed through EIBC were evaluated for their anti-mycobacterial activities. The assay was performed with *Mycobacterium.smegmatis* (MC<sup>2</sup>155) as surrogate model for screening drugs against mycobacterium<sup>4</sup> using growth inhibition assay by broth dilution method. The results were analyzed as the percentage of growth inhibition and from dose response curves MIC of all compounds are calculated and presented in Table 1. The screening results revealed that the compounds **7a**, **7b**, and **8a** show excellent anti-mycobacterial activities in a reference to isoniazid and rifampicin.

**Table 1:** Anti-mycobacterial activities of selected compounds

| Sl. No | product           | MIC $\mu\text{g/mL}$ | Sl. No | product          | MIC <sup>a,b,c,d</sup> $\mu\text{g/mL}$ |
|--------|-------------------|----------------------|--------|------------------|-----------------------------------------|
| 1      | <b>1a</b>         | >50                  | 11     | <b>4c</b>        | >50                                     |
| 2      | <b>1b</b>         | >50                  | 12     | <b>5a</b>        | >50                                     |
| 3      | <b>1c</b>         | >50                  | 13     | <b>5c</b>        | >50                                     |
| 4      | <b>1d</b>         | >50                  | 14     | <b>7a</b>        | 11.15 $\pm$ 0.24                        |
| 5      | <b>1f</b>         | >50                  | 15     | <b>7b</b>        | 6.14 $\pm$ 0.03                         |
| 6      | <b>2a</b>         | >50                  | 16     | <b>8a</b>        | 7.70 $\pm$ 0.58                         |
| 7      | <b>3a</b>         | >50                  | 17     | <b>9a</b>        | 31.04 $\pm$ 0.17                        |
| 8      | <b>3c</b>         | 30.49 $\pm$ 2.06     | 18     | <b>10a</b>       | >50                                     |
| 9      | <b>4a</b>         | 49.59 $\pm$ 2.44     | 19     | <b>10b</b>       | 23.47 $\pm$ 0.72                        |
| 10     | <b>4b</b>         | >50                  | 20     | <b>11a</b>       | 47.82 $\pm$ 4.41                        |
| *      | <b>Rifampicin</b> | 1.87                 | *      | <b>Isoniazid</b> | 15.25                                   |

<sup>a</sup>*Mycobacterium.smegmatis* ATCC 14468 (MC<sup>2</sup>155). <sup>b</sup>MIC is the concentration of compounds inhibiting growth by 90%. <sup>c</sup>50  $\mu\text{g/mL}$  of compound concentration is considered as showing no significant activity. <sup>d</sup>All experiments were carried out in triplicates and results were reported as  $\pm$  SD.

Next, we have evaluated cytotoxicity effect of the same compounds using cell-based assays to shed light on selectivity issues. The *in vitro* cell cytotoxicity assays were performed on four different human cancer cell lines such as A549 (human lung carcinoma epithelial), HeLa (human

2 WHO global health observatory data report. Geneva: GlobalTuberculosis Program; 2012

3 a) L. Ballell, R. H. Bates, R. J. Young, D. Alvarez-Gomez, E. Alvarez-Ruiz, V. Barroso, D. Blanco, B. Crespo, J. Escribano, R. González, S. Lozano, S. Huss, A. Santos-Villarejo, J. J. Martín-Plaza, A. Mendoza, M. J. Rebollo-Lopez, M. Remuiñan-Blanco, J. L. Lavandera, E. Pérez-Herran, F. J. Gamó-Benito, J. F. García-Bustos, D. Barros, J. P. Castro, N. Cammack, *ChemMedChem*, **2013**, *8*, 313-321; b) L. G. Dover, G. D. Coxon, *J. Med. Chem.* **2011**, *54*, 6157-6165.

4 a) M. Altaf, C. H. Miller, D. S. Bellows, R. Toole, *Tuberculosis* **2010**, *90*, 333-337; b) C. O. Esimone, C. S. Nworu, E. B. Onuigbo, J. U. Omeje, K. L. Nsirim, J. C. Ogbu, M. I. Ngwu, K. F. Chah, *International journal of Green Pharmacy* **2009**, *3*, 201-205; c) V. Chaturvedi, N. Dwivedi, R. P. Tripathi, S. Sinha, *J. Gen. Appl. Microbiol.*, **2007**, *53*, 333-337.

epithelial cervical cancer), DU145 (prostate cancer) and MCF-7 (breast cancer). The selectivity index (SI,  $IC_{50}/MIC$  ratio) is summarized in the Table 2 which showed that the compounds **7a**, **7b** and **8a** displayed extraordinary selectivity towards *Mycobacterium.smegmatis*. The results are very promising as these compounds especially **7a**, **7b** and **8a** are active against mycobacterium with no cytotoxicity and therefore could have potential for further optimization as potential anti-TB drugs.

**Table 2:** Selectivity index (SI) is the ratio of  $IC_{50}/MIC$

| Sl. No | product    | DU145       | Hela         | MCF-7        | A549         |
|--------|------------|-------------|--------------|--------------|--------------|
| 1      | <b>3c</b>  | 1.62        | >13          | 2.85         | 2.31         |
| 2      | <b>4a</b>  | 0.83        | >13          | >13          | 1.45         |
| 3      | <b>7a</b>  | <b>5.66</b> | <b>4.17</b>  | <b>3.98</b>  | <b>4.19</b>  |
| 4      | <b>7b</b>  | <b>6.94</b> | <b>13.37</b> | <b>14.25</b> | <b>10.54</b> |
| 5      | <b>8a</b>  | >13         | >13          | >13          | <b>11.15</b> |
| 6      | <b>9a</b>  | 1.28        | 2.71         | 63.12        | 1.99         |
| 7      | <b>10b</b> | 1.42        | >13          | >13          | 2.83         |
| 8      | <b>11a</b> | 1.11        | 1.66         | >13          | 1.60         |

## Methods:

**In vitro anti-mycobacterial activity assay:** Anti-mycobacterial activity of the synthesized compounds was performed with *Mycobacterium. smegmatis* strain using growth inhibition assay by turbidometry. Briefly, isolated single colonies of *M. smegmatis* MC<sup>2</sup> 155 (ATCC 14468) from 7H10 agar plate were grown overnight in Middlebrook 7H9 medium (0.47% Middlebrook 7H9 broth base, 10% ADS, 0.2% glycerol, and 0.1% Tween-80) to mid exponential phase at 37 °C. Subsequently, 5 ml of Middlebrook 7H9 broth were inoculated with the overnight grown culture and allowed to grow at 37 °C to early log phase ( $OD_{600} \approx 0.3$ ). For anti-microbial assay, 98  $\mu$ l of 1:1000-folds dilution of secondary culture was dispensed into 96-well microtiter plate. To each well 2  $\mu$ l of test compound was added to attain a final concentration of 6.25, 12.5, 25 and 50  $\mu$ M, and allowed to grow at 37 °C for 32 hours. 240  $\mu$ l of sterile water were added to each well of the peripheral rows of 96-well plate to minimize media evaporation during assay incubation. Bacterial growth was assessed after 32 hours of incubation by measuring turbidity at 600nm  $OD_{600}$  values using TECAN Infinite 200 PRO™ (Tecan Instruments, Switzerland). Positive controls were included in every assay plates using stock solutions of INH (10 mg/mL, HiMedia) and Rifampicin (10 mg/mL, HiMedia) to achieve the final concentration of 0.5, 1, 2, 4, 8 and 16  $\mu$ g/mL for INH and 0.25, 0.5, 1, 2, 4 and 8  $\mu$ g/mL for Rifampicin. Additional controls DMSO (solvent without compound) and medium without inoculums were included in all the assay plates avoiding intra assay variability. The results were analyzed as the

percentage of growth inhibition. All experiments were carried out in triplicates and results were reported as  $\pm$  SD. From the percentage of the growth inhibition, the  $GI_{50}$  values are calculated.

**Anti cell proliferative Assays:** The synthesized compounds have been valuated for their *in vitro* cytotoxicity in four different human cancer cell lines. All cell lines used in this study were purchased from the American Type Culture Collection (ATCC, USA). A549 (human lung carcinoma epithelial), HeLa (human epithelial cervical cancer), DU145 (prostate cancer) and MCF-7 (breast cancer) were grown in standard Dulbecco's modified Eagles medium containing 10% FBS in a humidified atmosphere of 5%  $CO_2$  at 37 °C. Cells were trypsinized when sub-confluent from T75 flasks/ 90mm dishes and seeded in 96 well plates at a density of 5000-10000 cells/well depending on the doubling time of individual cell lines further continued to grow in complete medium under standard conditions. After 18 hrs to treat cells with test molecules, aliquots of 2  $\mu$ L of the compound dilutions were added to the appropriate microtiter wells already containing 198  $\mu$ L of fresh medium with cells, resulting in the required final drug concentrations. As a standard reference drug we have used Doxorubicin in all assay plates served as internal control. For each, compound four concentrations (0.1, 1, 10 and 100  $\mu$ M) were evaluated as per NCI cell line screening protocol and each was done in triplicate wells. Plates were incubated further for 48h and assay was terminated by the addition of 10  $\mu$ L of 3-(4, 5-Dimethylthiazol-2-yl)-2, 5-diphenyltetrazolium bromide (MTT, 5mg/ml) and incubated for 60 min at 37 °C. The plates were air-dried and the dye bound to the cells was subsequently solubilized in 100  $\mu$ L of DMSO, and the absorbance was read on a multimode reader (Tecan) at a wavelength of 560 nm is directly proportional to cell growth. Percent growth was calculated for test wells relative to control wells. The above determinations were repeated three times. The growth inhibitory effects of the compounds were analyzed by generating dose response curves as a plot of the percentage surviving cells versus drug concentration. Sensitivity of the cancer cells to the drug treatment was expressed in terms of the concentration of drug required for 50% inhibition of cell growth ( $IC_{50}$ ) results were presented in table 03 supplementary materials.

**Table 03:** Selected compounds  $IC_{50}$  values for different cancer cell lines

| S. No. | Compound  | DU-145           |          | HeLa             |          | MCF-7            |          | A549             |          |
|--------|-----------|------------------|----------|------------------|----------|------------------|----------|------------------|----------|
|        |           | IC-50 ( $\mu$ M) | Std Dev. |
| 1      | <b>1a</b> | 14.27            | 1.71     | >200             |          | 113.27           | 5.69     | 138.08           | 12.74    |
| 2      | <b>1b</b> | 79.58            | 6.86     | 120.57           | 2.32     | 165.11           | 12.32    | 143.47           | 10.70    |
| 3      | <b>1c</b> | 27.95            | 3.65     | 127.66           | 24.93    | 126.62           | 6.26     | 125.68           | 1.20     |
| 4      | <b>2a</b> | 85.59            | 3.24     | >200             |          | >200             |          | 146.87           | 7.17     |

|    |             |        |       |        |       |        |       |        |       |
|----|-------------|--------|-------|--------|-------|--------|-------|--------|-------|
| 5  | <b>3a</b>   | 131.71 | 14.05 | >200   |       | 173.90 | 22.52 | 175.99 | 7.95  |
| 6  | <b>3c</b>   | 93.74  | 7.45  | >200   |       | 165.09 | 0.05  | 133.63 | 9.82  |
| 7  | <b>4a</b>   | 84.26  | 12.29 | >200   |       | >200   |       | 148.29 | 21.44 |
| 8  | <b>4b</b>   | 95.41  | 7.27  | >200   |       | >200   |       | 126.67 | 0.07  |
| 9  | <b>4c</b>   | 88.58  | 5.12  | 165.28 | 14.27 | 155.34 | 9.82  | 168.59 | 7.87  |
| 10 | <b>5a</b>   | 87.29  | 12.97 | >200   |       | 185.73 | 29.64 | 125.71 | 16.52 |
| 11 | <b>5c</b>   | 65.47  | 3.01  | 153.38 | 6.87  | 192.21 | 20.01 | 137.54 | 12.02 |
| 12 | <b>7a</b>   | 133.72 | 3.28  | 98.41  | 14.02 | 94.06  | 6.10  | 99.02  | 3.30  |
| 13 | <b>7b</b>   | 85.15  | 1.81  | 164.09 | 39.61 | 174.90 | 12.34 | 129.33 | 25.96 |
| 14 | <b>8a</b>   | >200   |       | >200   |       | >200   |       | 160.09 | 9.49  |
| 15 | <b>9a</b>   | 76.37  | 1.42  | 161.10 | 12.11 | 185.61 | 11.69 | 118.21 | 4.98  |
| 16 | <b>10a</b>  | 81.27  | 5.40  | >200   |       | >200   |       | >200   |       |
| 17 | <b>10b</b>  | 79.91  | 5.38  | >200   |       | >200   |       | 159.30 | 33.25 |
| 18 | <b>1d</b>   | 87.74  | 4.10  | 159.52 | 13.53 | >200   |       | 138.68 | 20.71 |
| 19 | <b>1f</b>   | 160.78 | 20.54 | >200   |       | >200   |       | >200   |       |
| 20 | <b>11a</b>  | 111.88 | 6.08  | 166.70 | 26.00 | >200   |       | 160.60 | 6.41  |
| 21 | Doxorubicin | 6.73   | 0.18  | 7.51   | 0.10  | 7.87   | 0.13  | 7.17   | 0.39  |

## 9. X-ray Crystallography Data:

X-ray data for the compounds were collected at room temperature using a Bruker Smart Apex CCD diffractometer with graphite monochromated MoK $\alpha$  radiation ( $\lambda=0.71073\text{\AA}$ ) with  $\omega$ -scan method [Bruker (2001). SAINT (Version 6.28a) & SMART (Version 5.625). Bruker AXS Inc., Madison, Wisconsin, USA.]. Preliminary lattice parameters and orientation matrices were obtained from four sets of frames.

Integration and scaling of intensity data were accomplished using SAINT program [Bruker (2001). SAINT (Version 6.28a) & SMART (Version 5.625). Bruker AXS Inc., Madison, Wisconsin, USA.]. The structure was solved by direct methods using SHELXS97 [Sheldrick GM. (2008) Acta Crystallogr A64: 112-122.] and refinement was carried out by full-matrix least-squares technique using SHELXL97 [Sheldrick GM. (2008) Acta Crystallogr A64: 112-122.]. Anisotropic displacement parameters were included for all non-hydrogen atoms. The hydrogen atoms attached to nitrogen atoms of **1e** were located in a difference density map and refined isotropically. All other H atoms were positioned geometrically and treated as riding on their parent C atoms with C-H = 0.93 - 0.96  $\text{\AA}$  and  $U_{\text{iso}}(\text{H}) = 1.2$  or  $1.5U_{\text{eq}}(\text{C})$ . In **1e**, the ethyl acetate solvent shows high thermal vibrations, hence attempts were made to refine the solvent with disorder model was unsuccessful. The ethyl acetate atoms C30/C31/C32/C33/O2/O3 were constrained with distance and ISOR restraints. In **5c**,

the atoms C22 and C23 were disordered over two sites (C22/C22' & C23/C23') and the site-occupancy factors of the disordered atoms were refined to 0.63(2) and 0.37(2). The major and minor components of the disordered atoms were restrained to be similar using SIMU and DELU instructions. The C-C distances of the disordered atoms were constrained with 1.45(1)Å.

ORTEP diagram of **1b** (CCDC 928899)

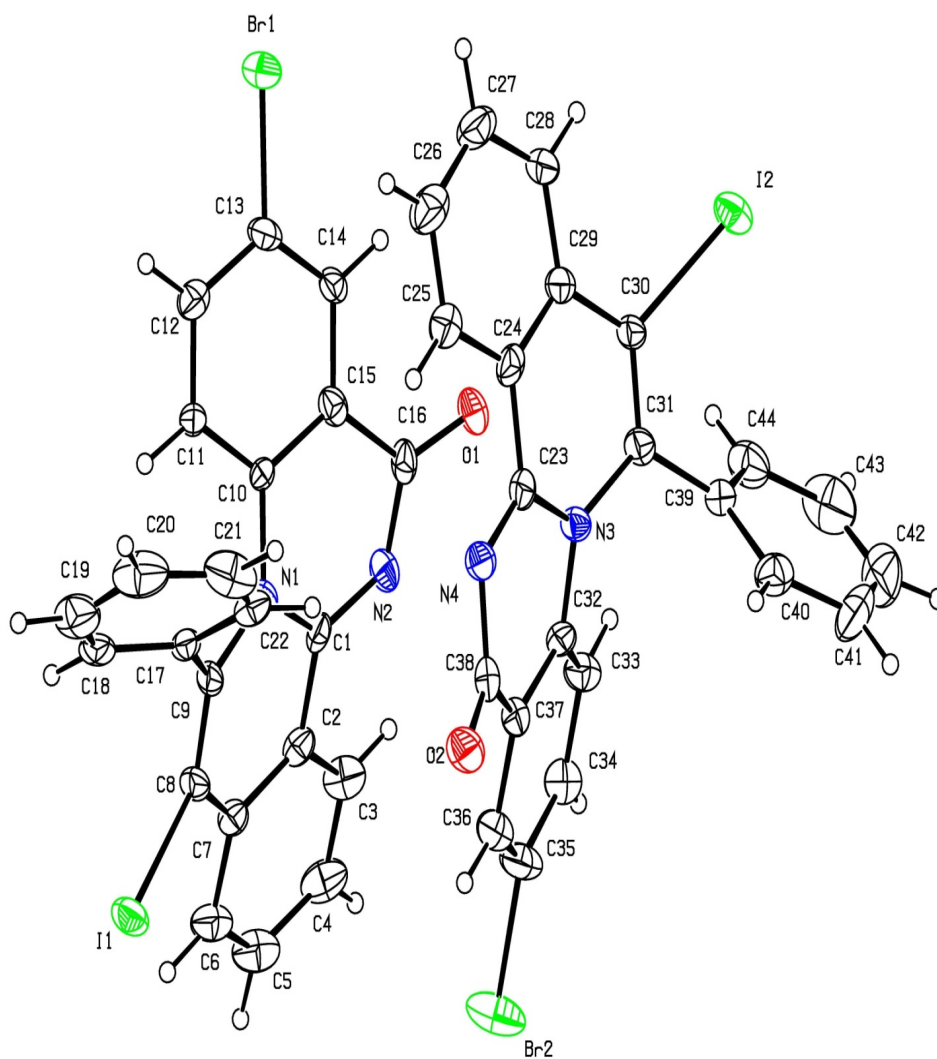

### ORTEP diagram of **1e** (CCDC 929085)

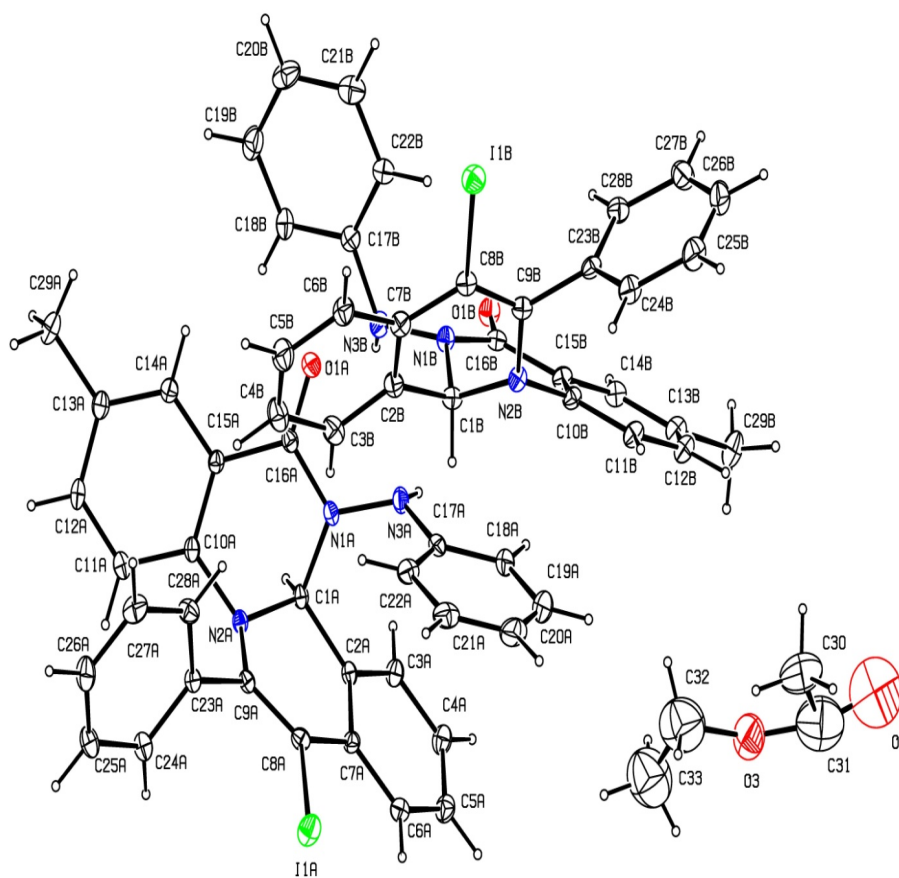

### ORTEP diagram of **5c** (CCDC928900)

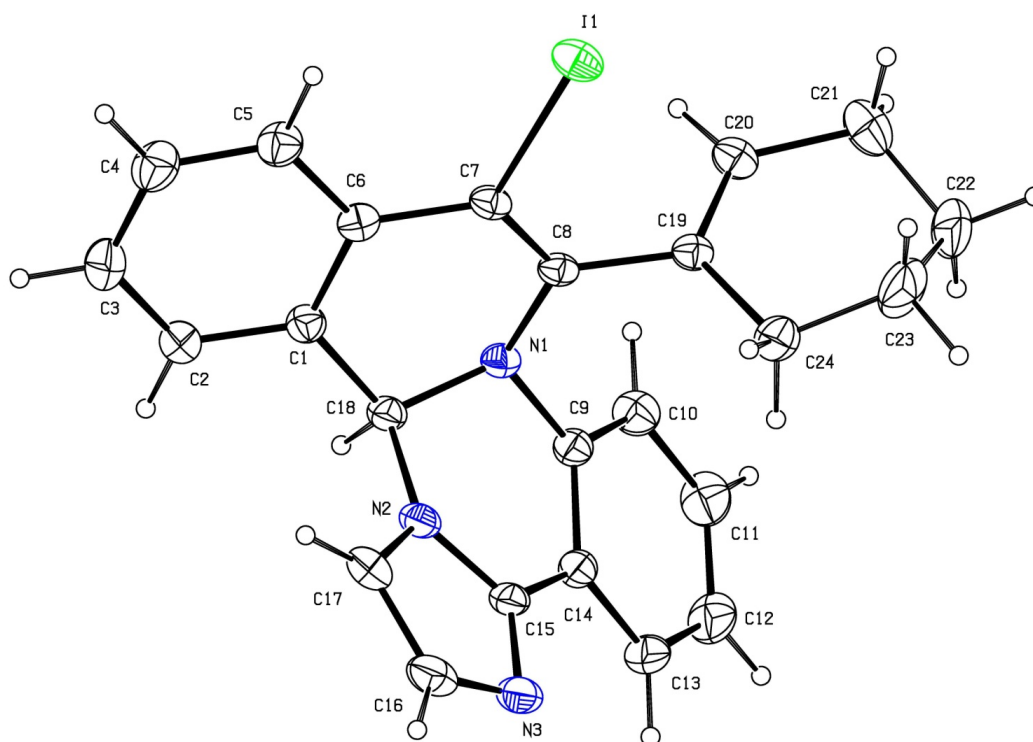

## 10. $^1\text{H}$ NMR and $^{13}\text{C}$ NMR Spectra of Compounds

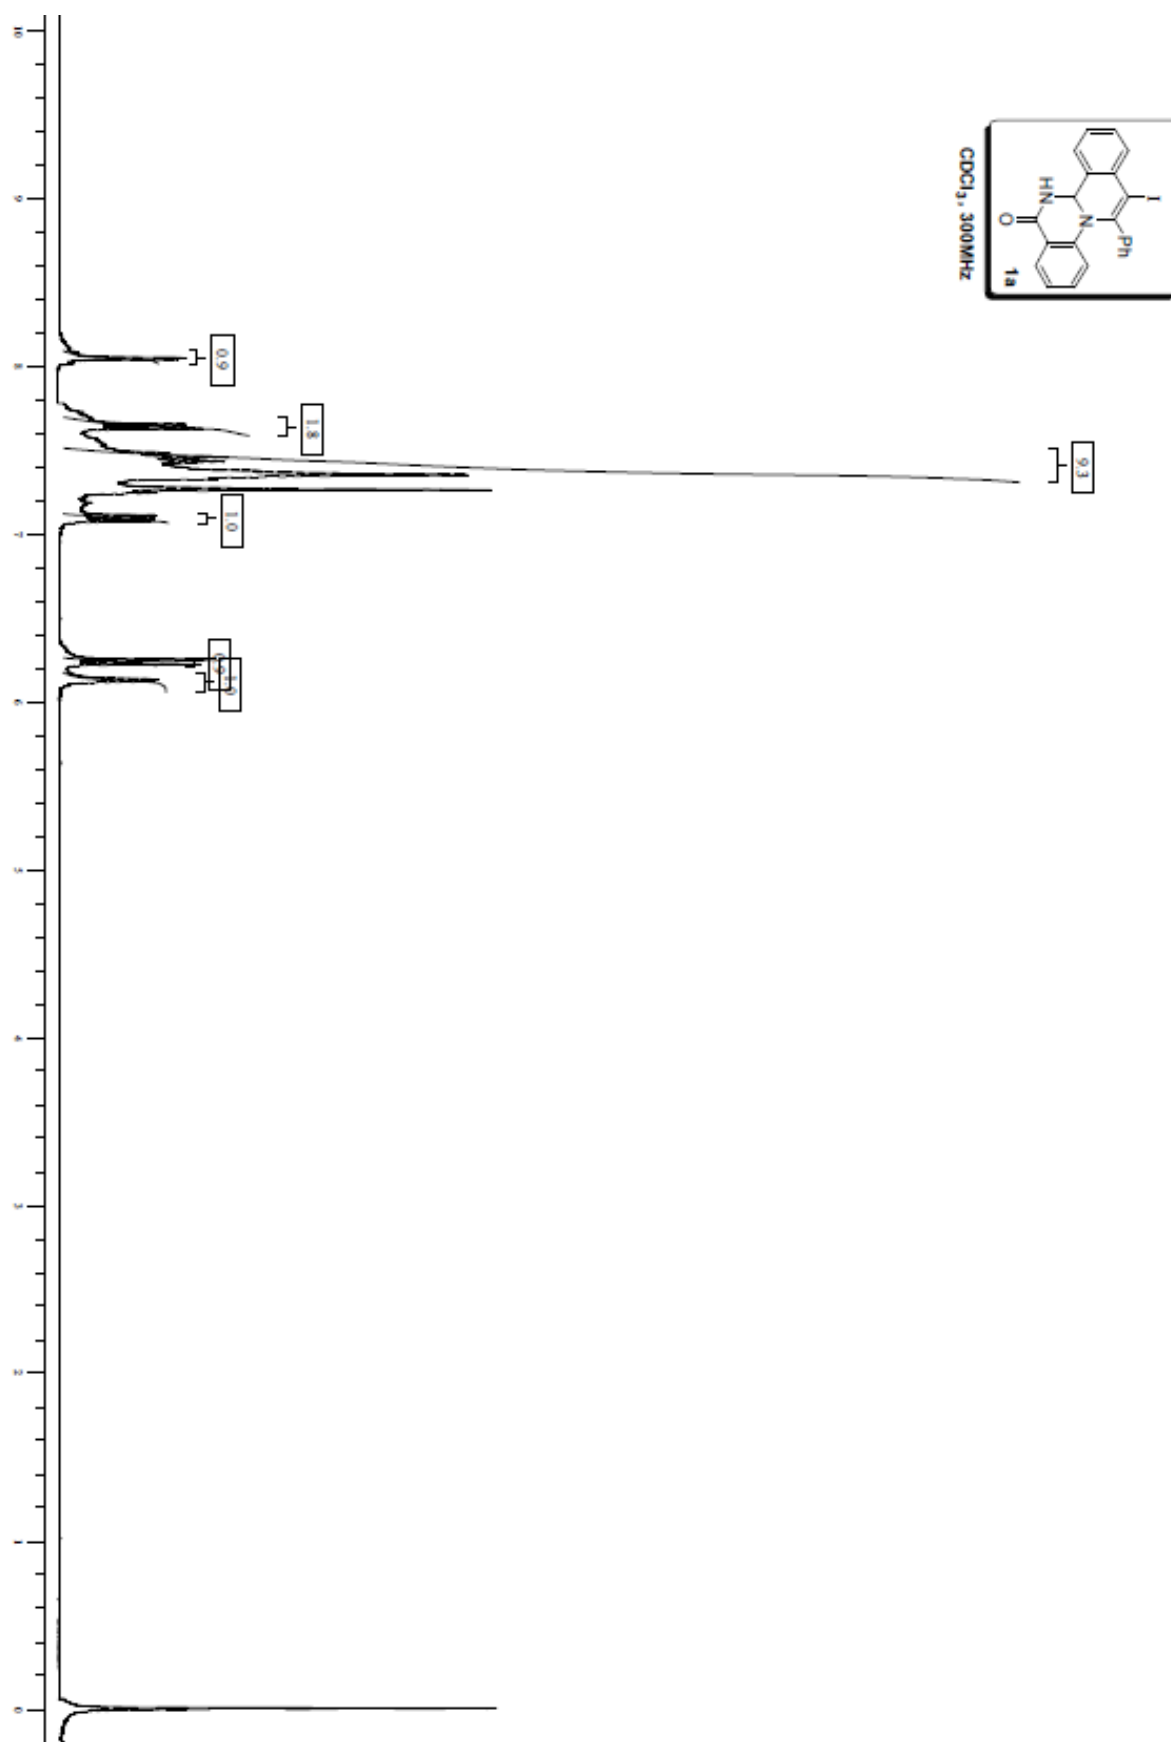

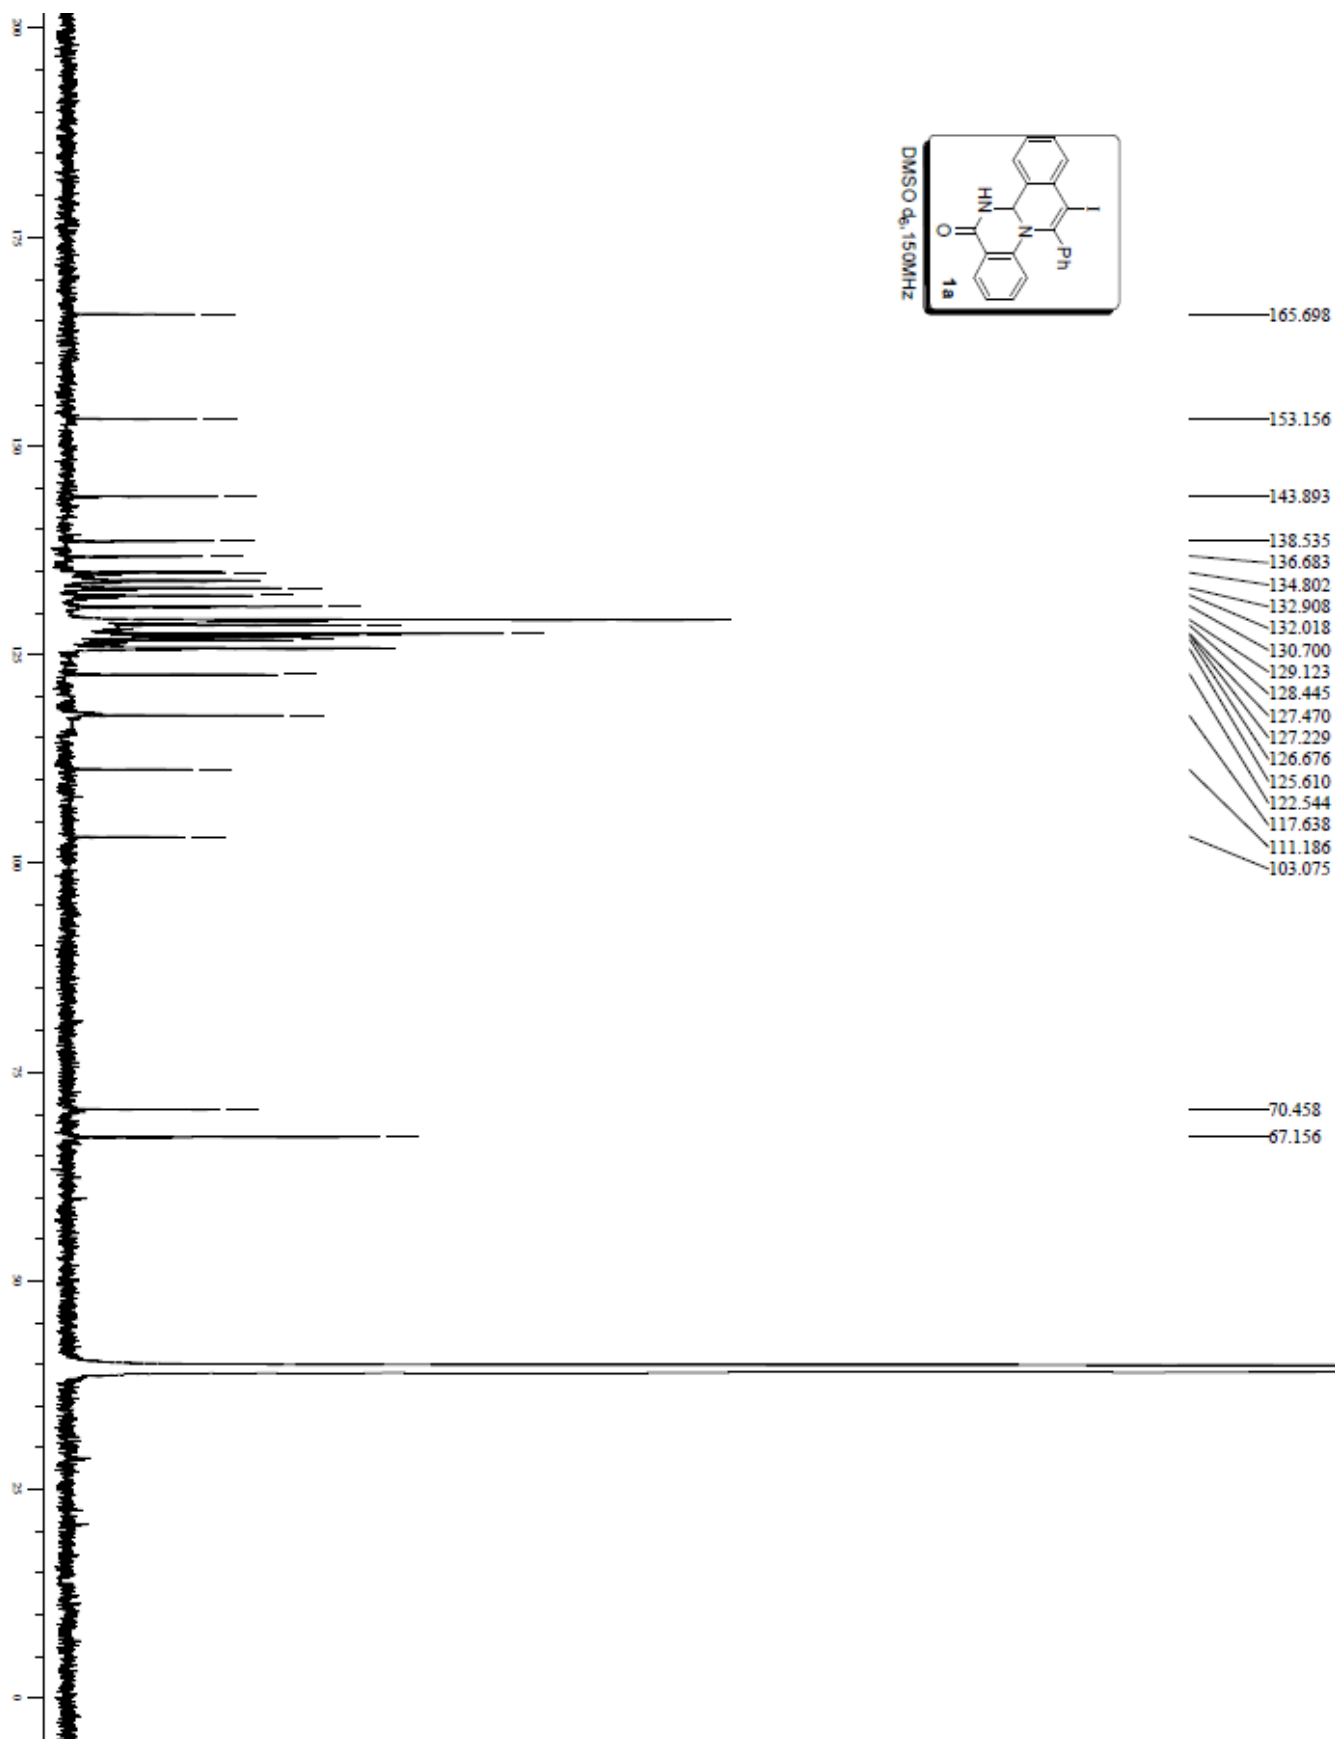



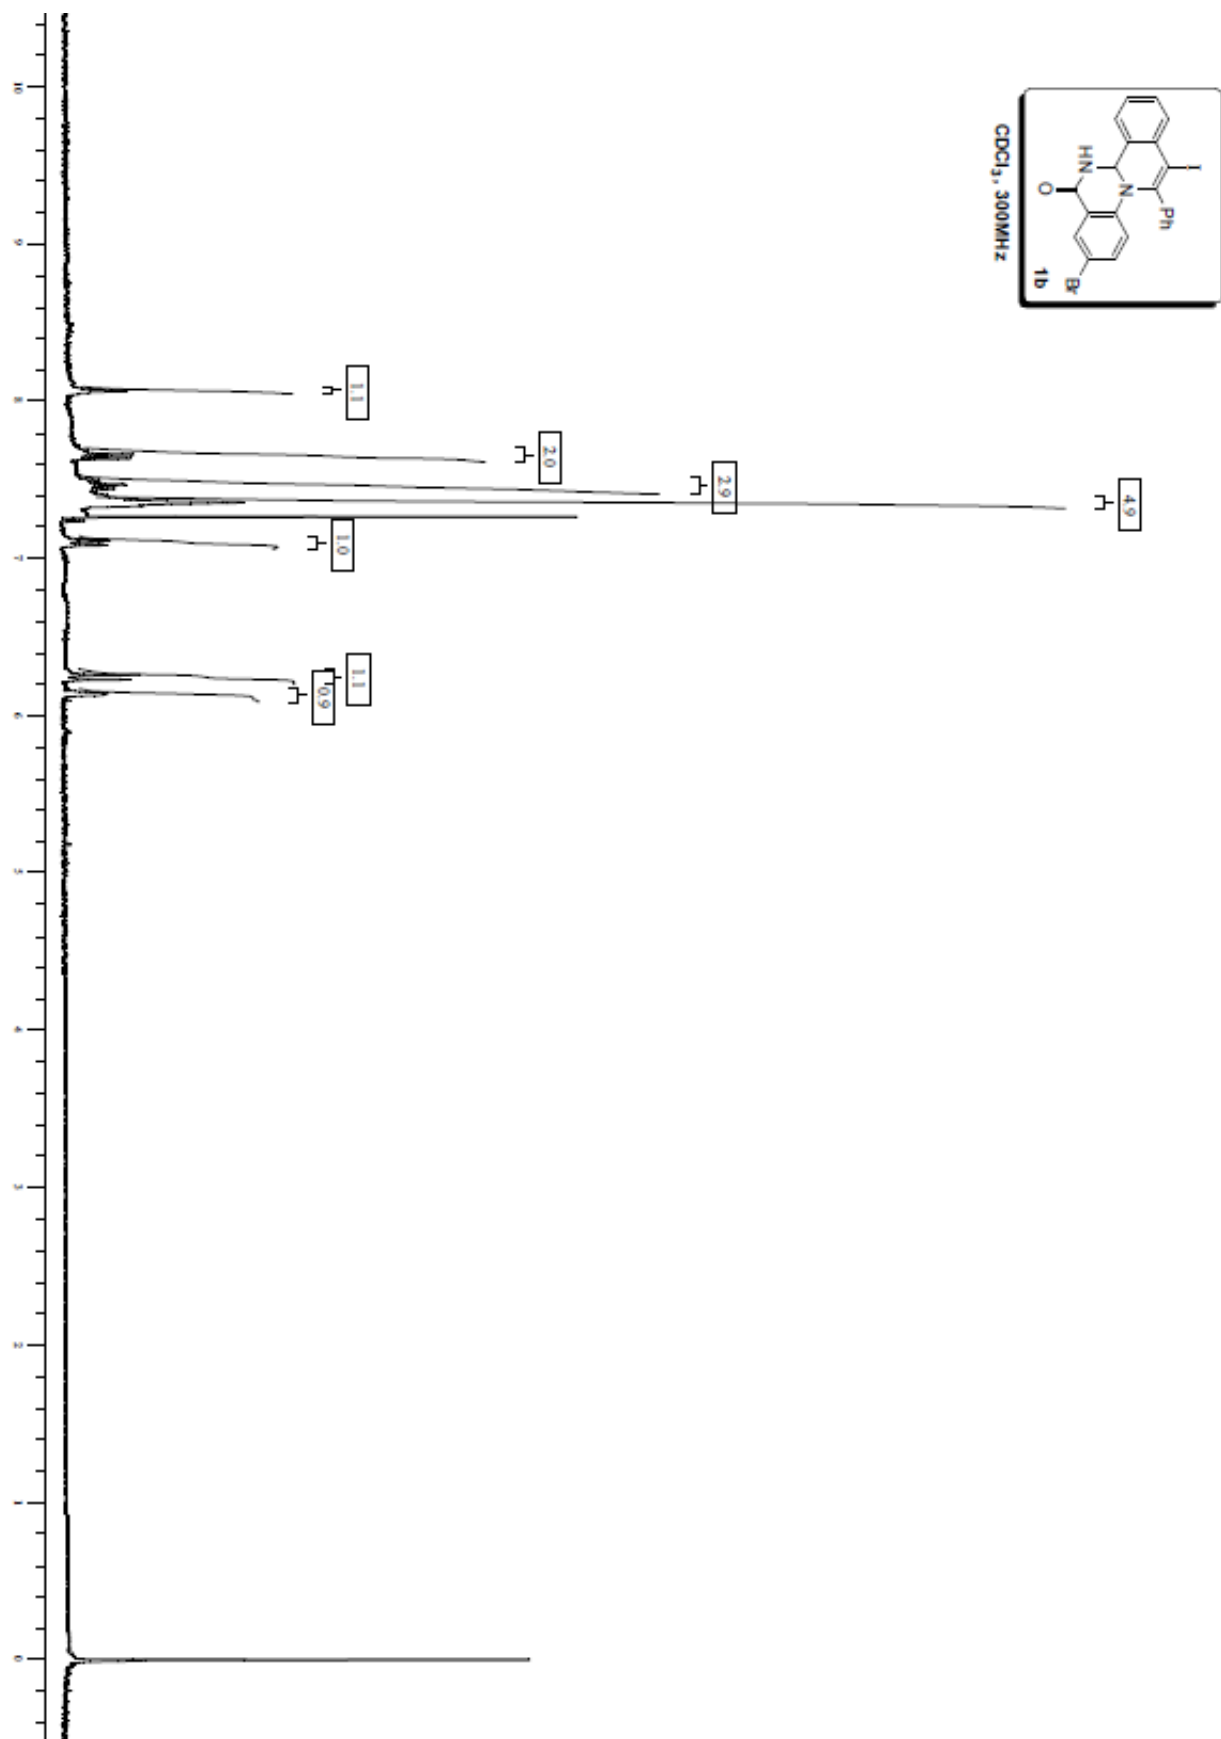

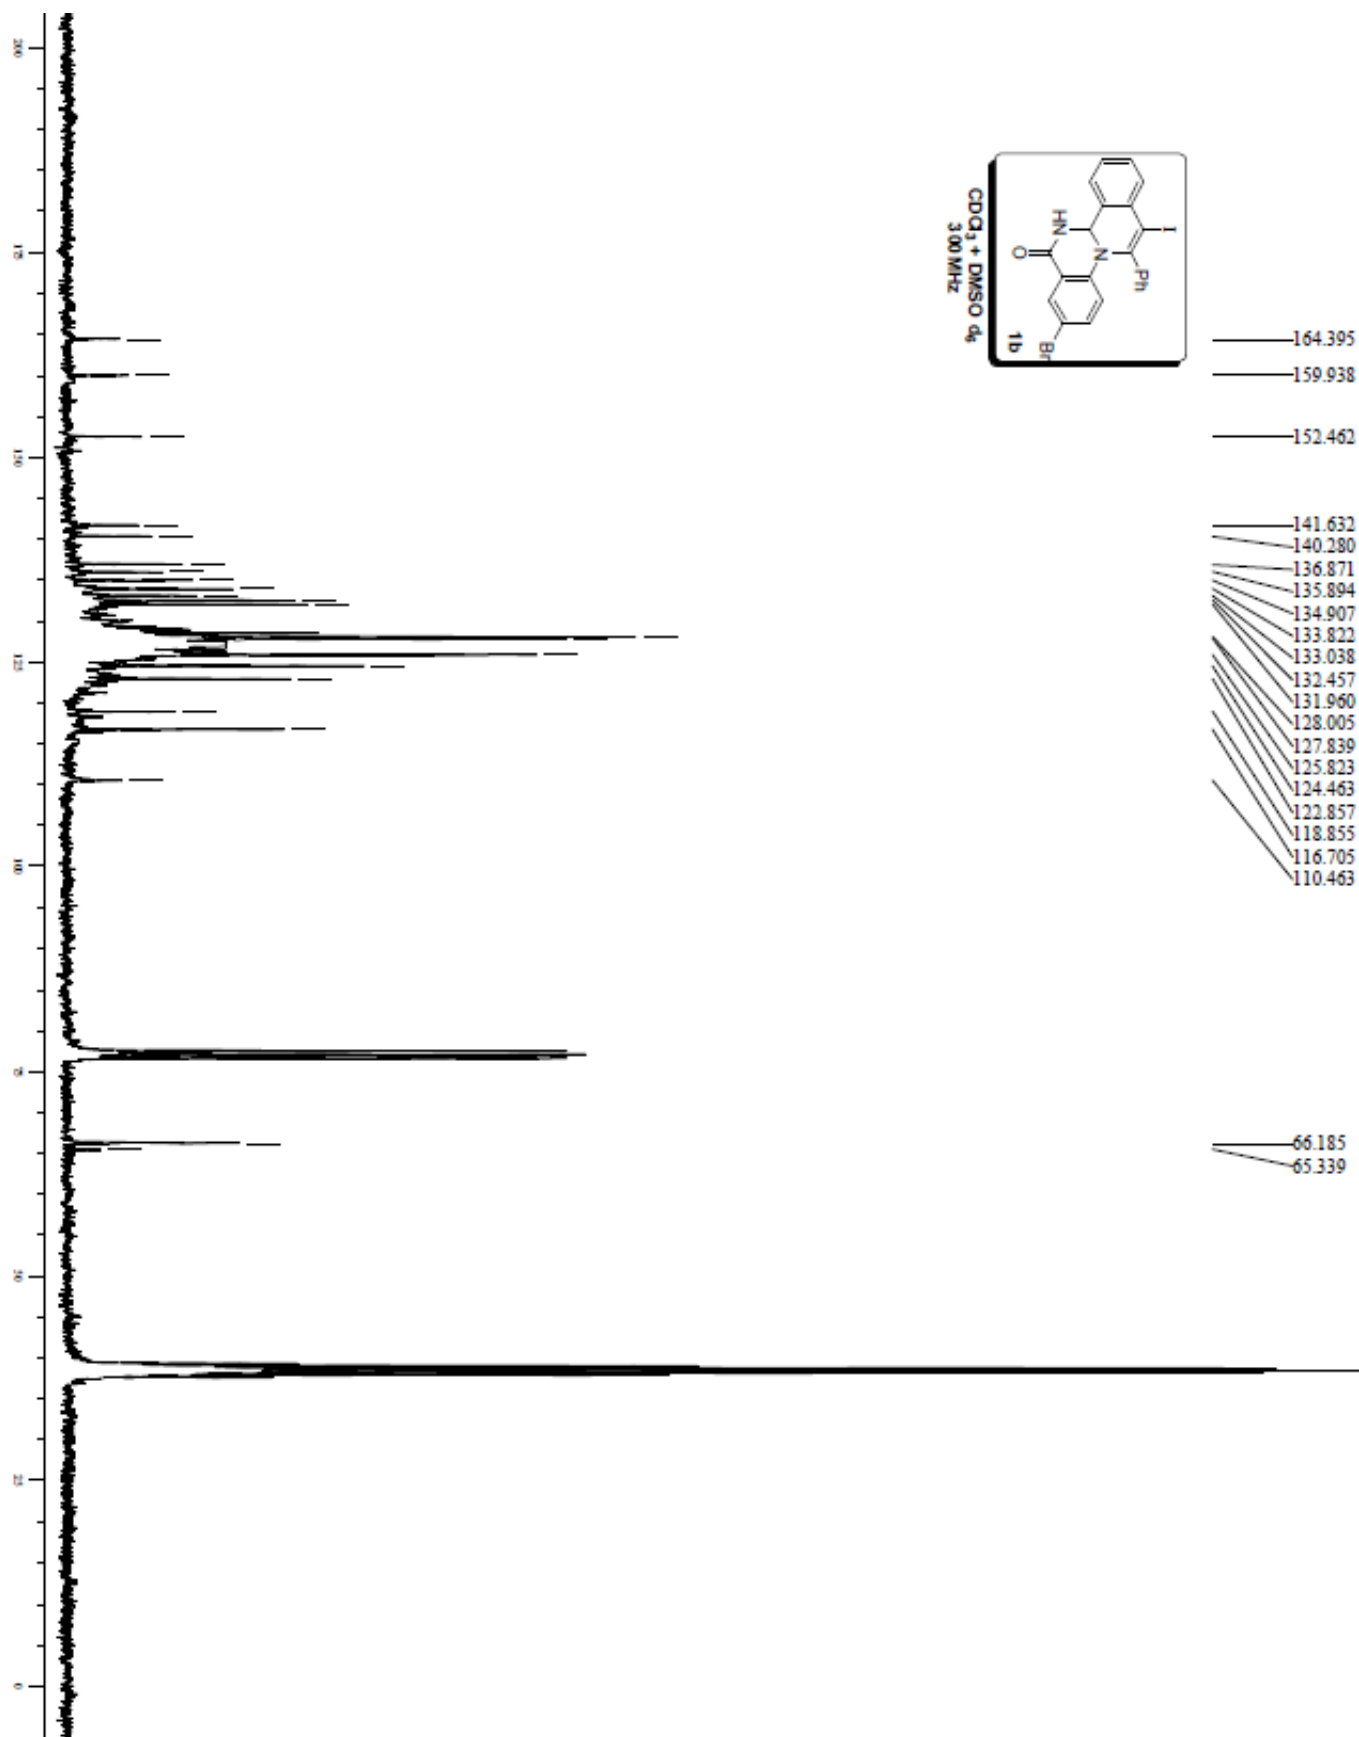

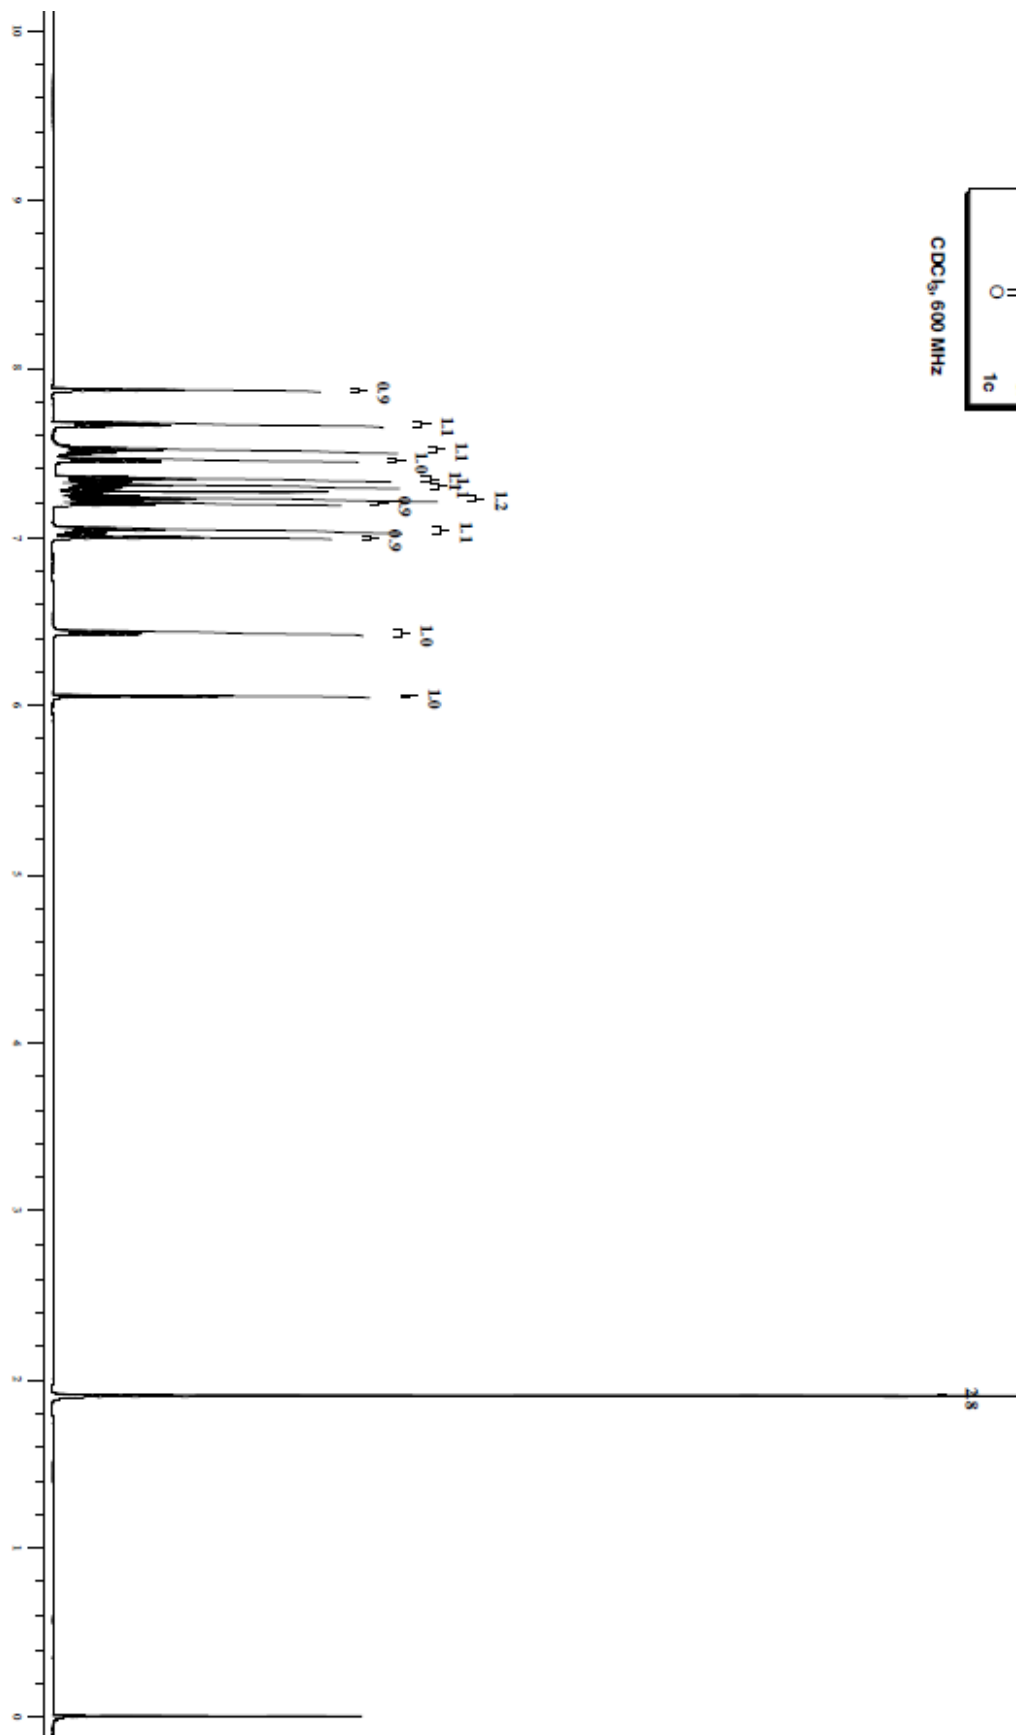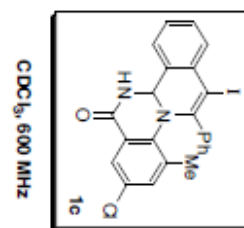

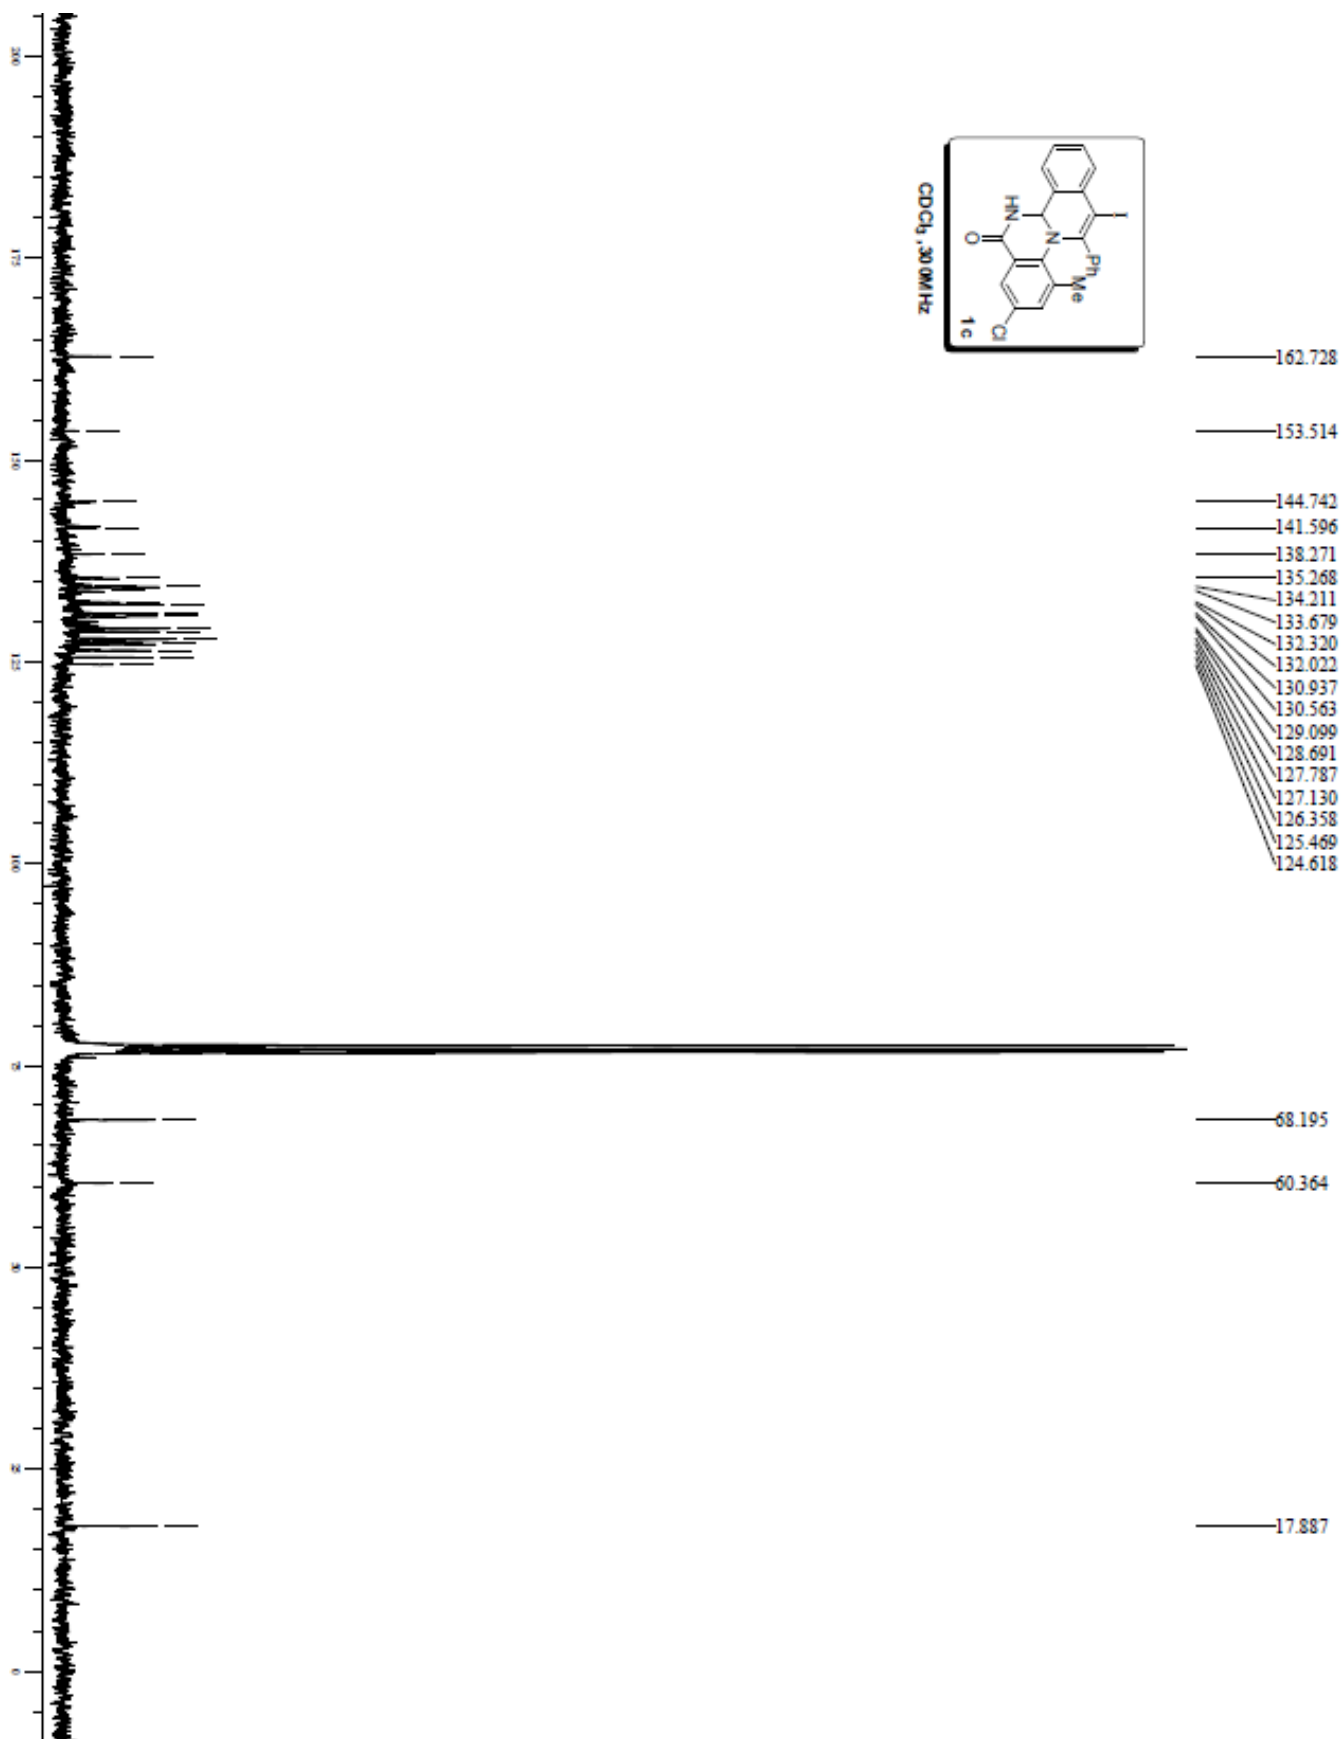

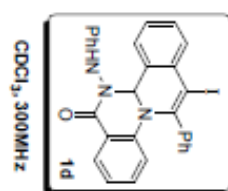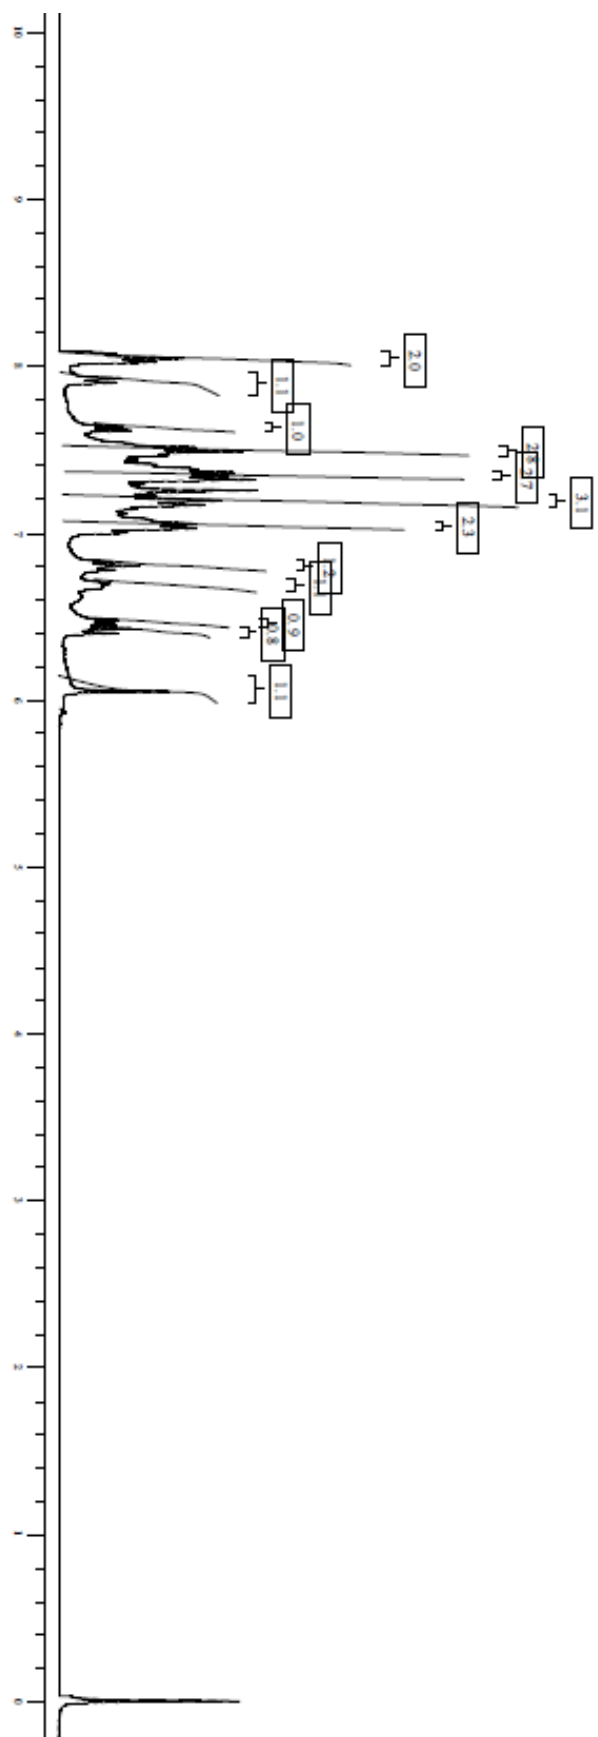

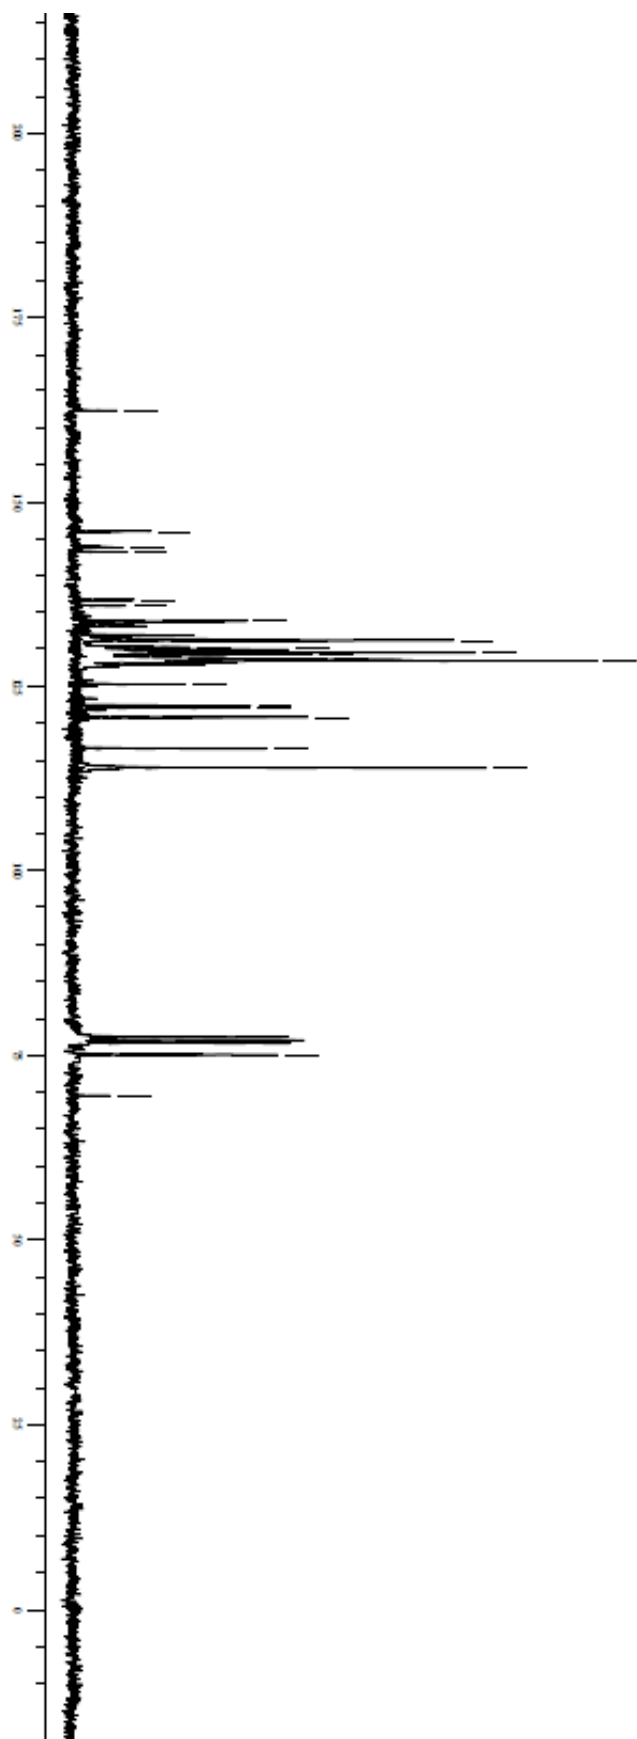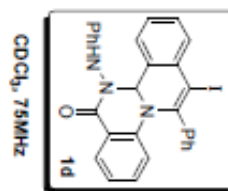

- 162.272
- 145.923
- 143.734
- 143.131
- 136.637
- 135.831
- 133.719
- 131.146
- 130.230
- 129.882
- 129.490
- 129.241
- 128.660
- 128.506
- 128.377
- 125.184
- 122.302
- 121.990
- 120.734
- 116.471
- 113.874
- 75.014
- 69.455

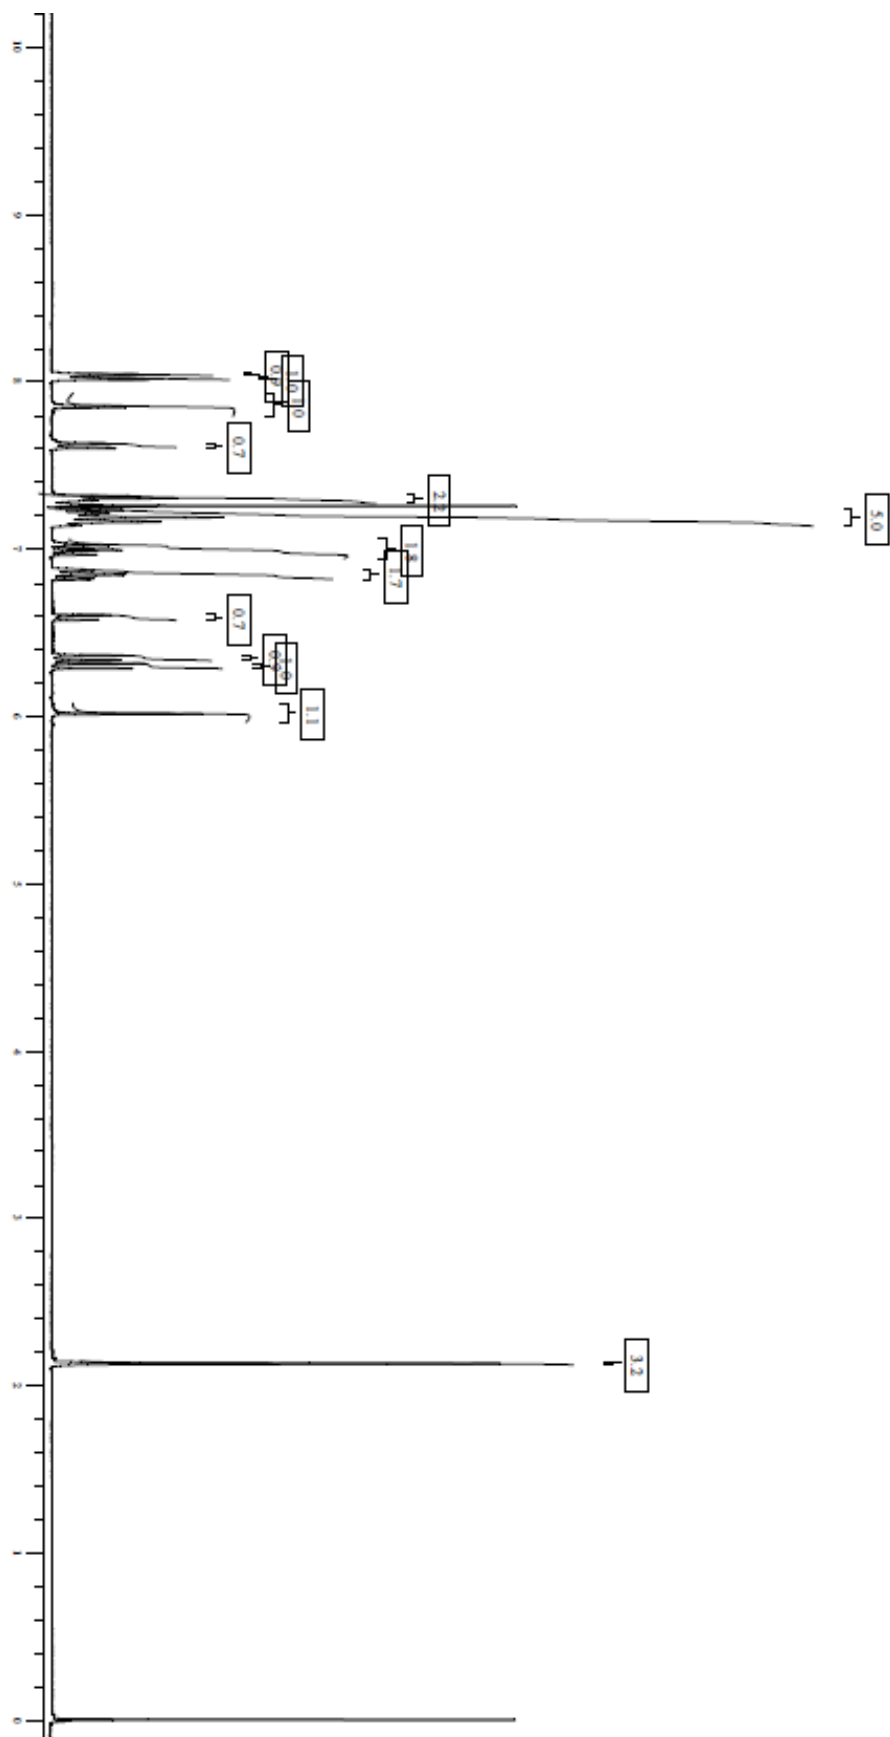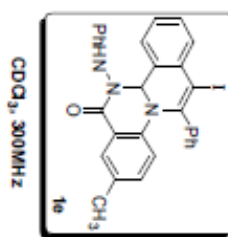

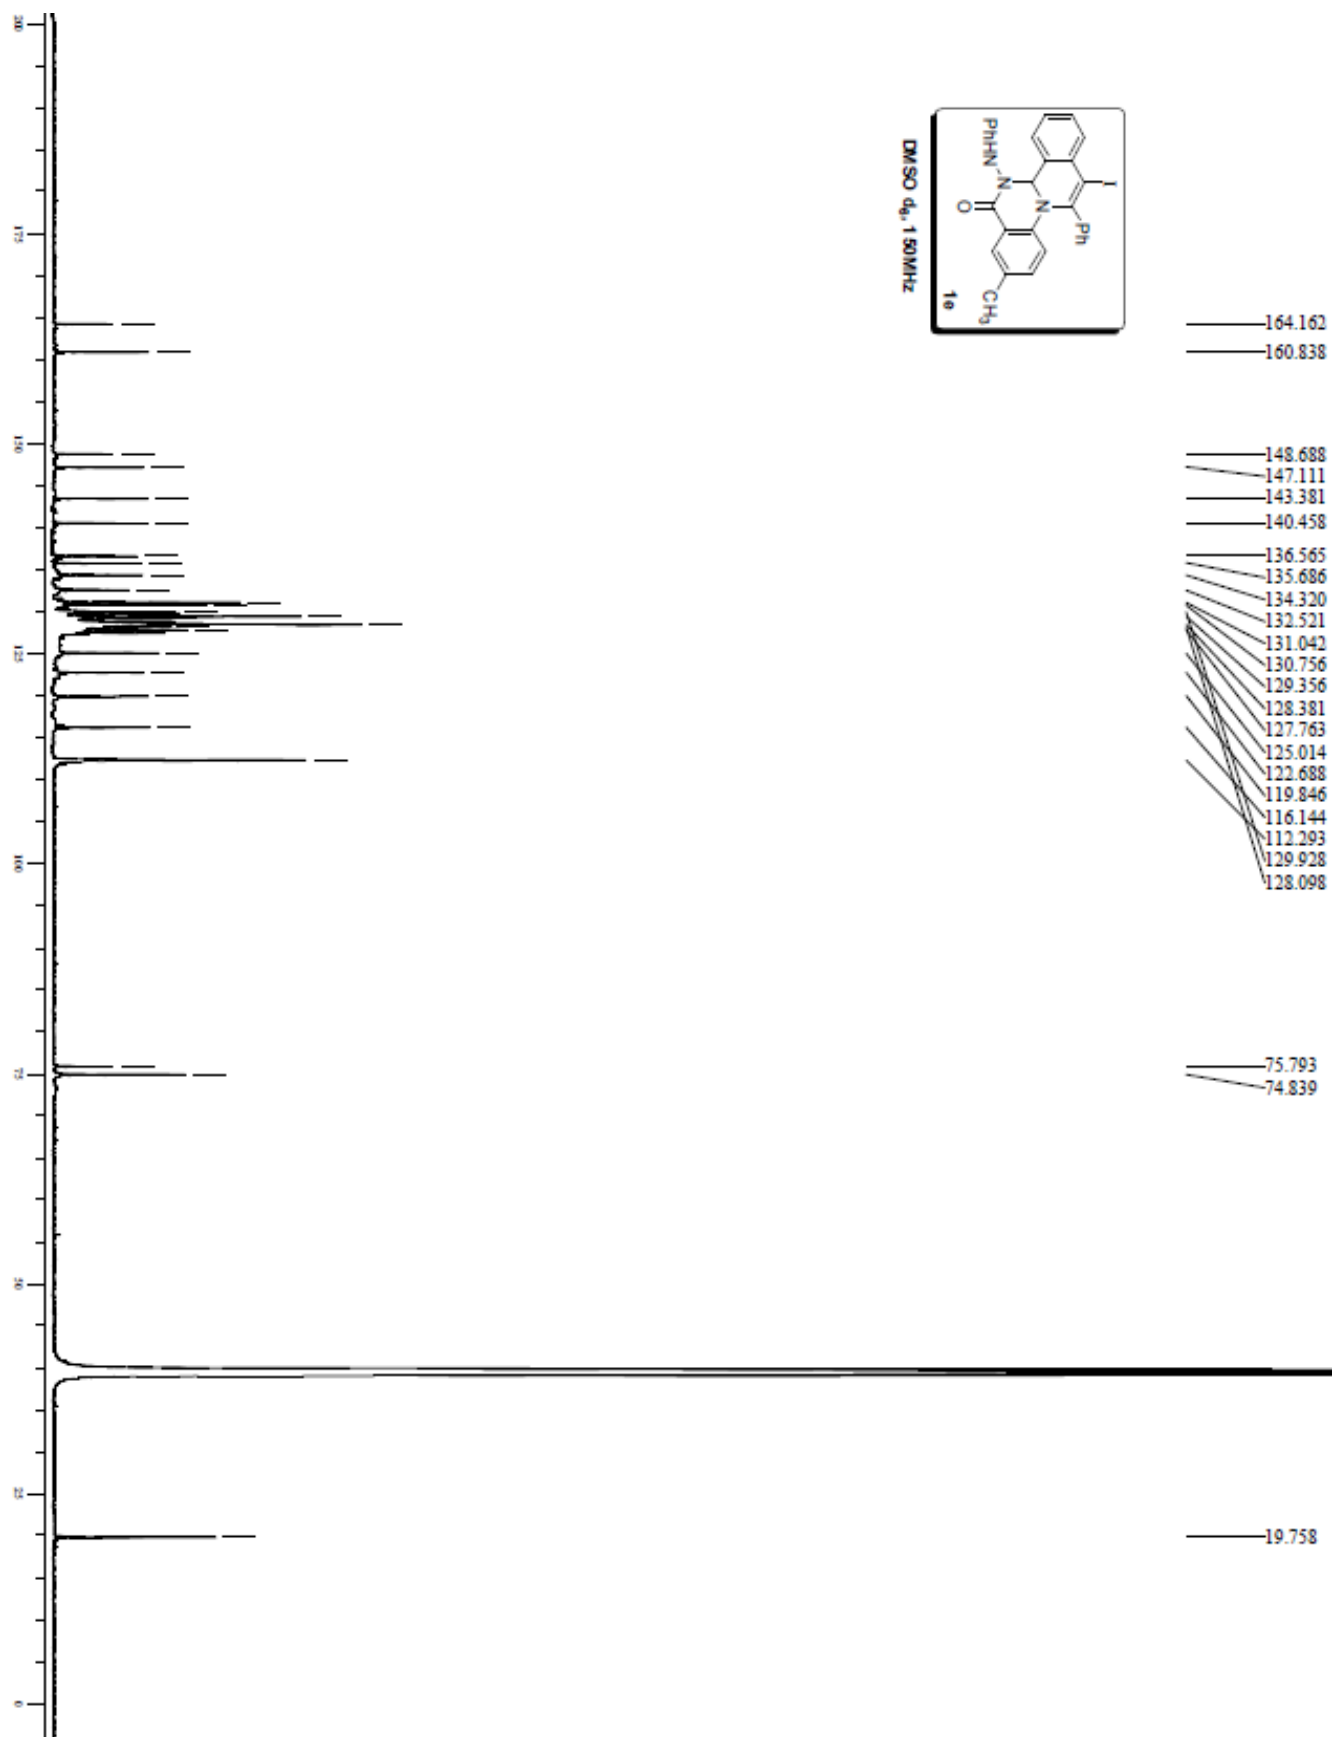



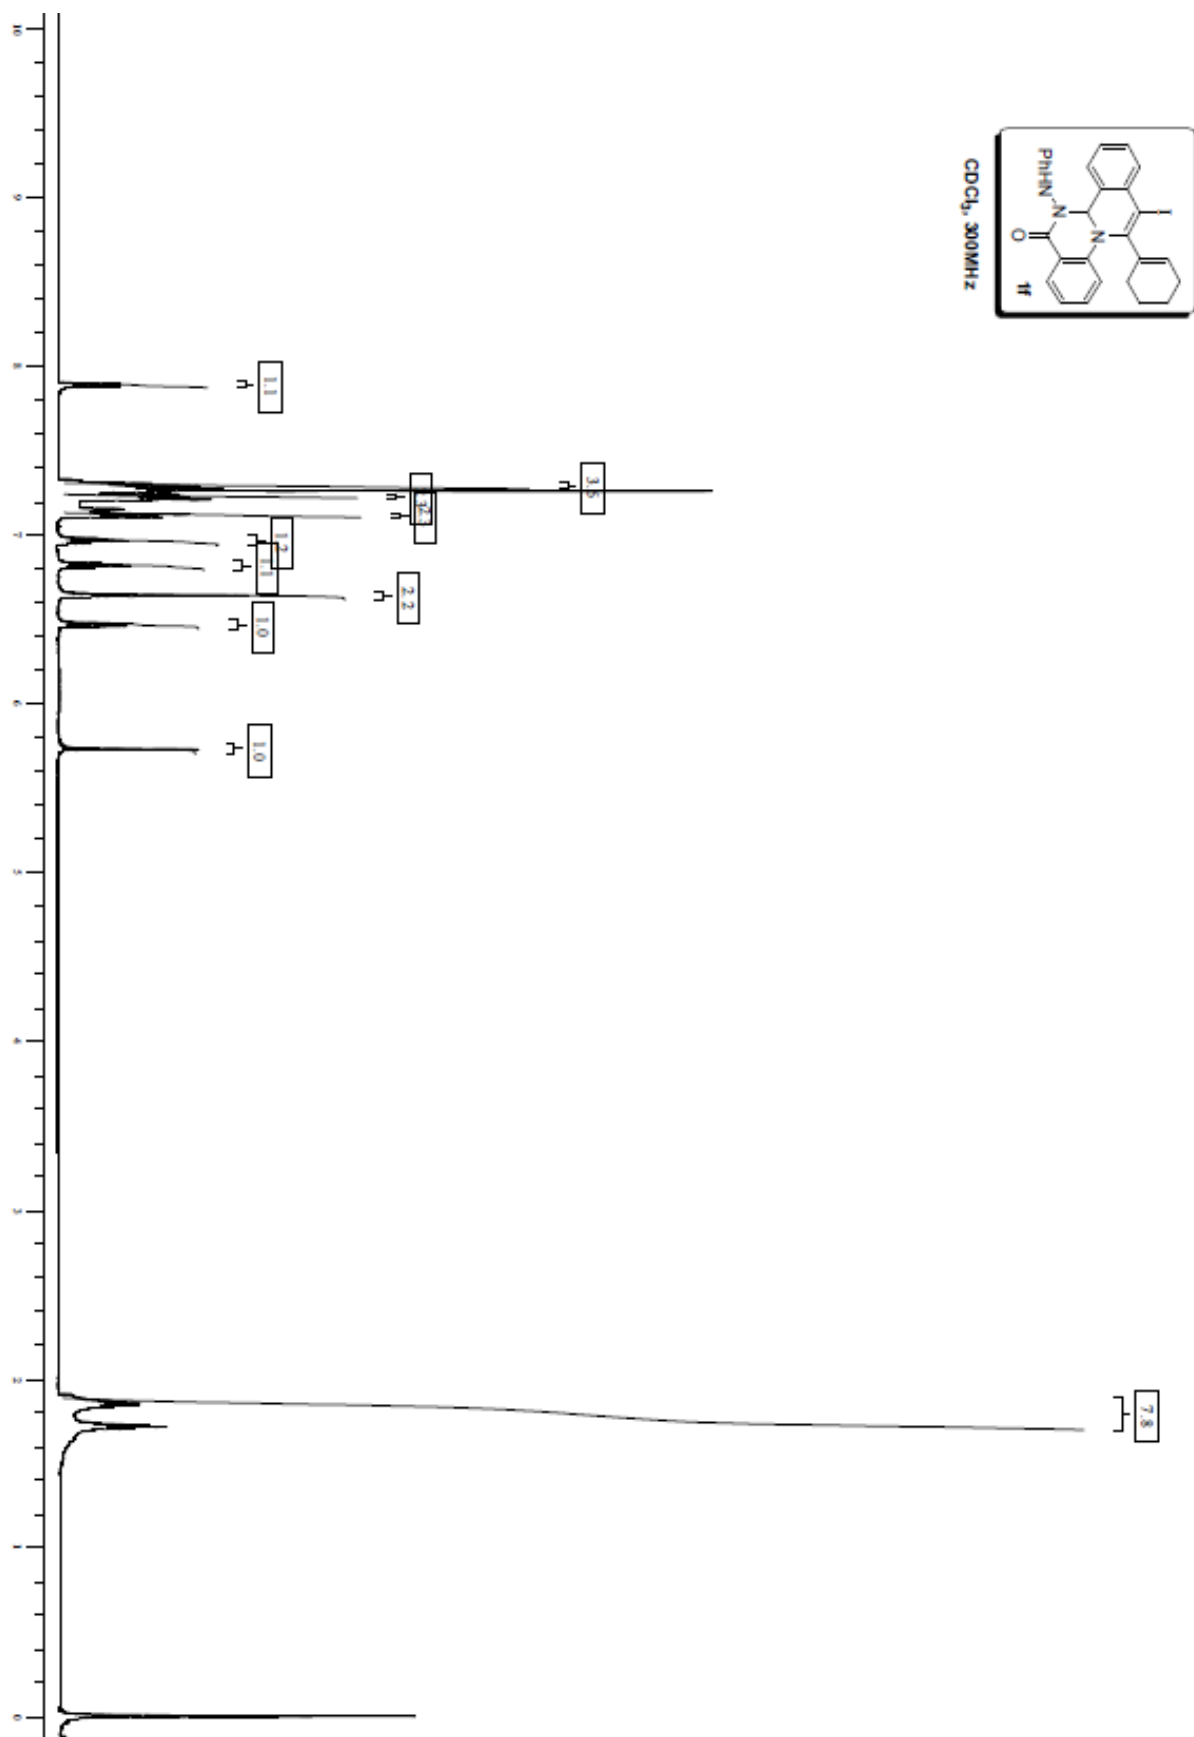

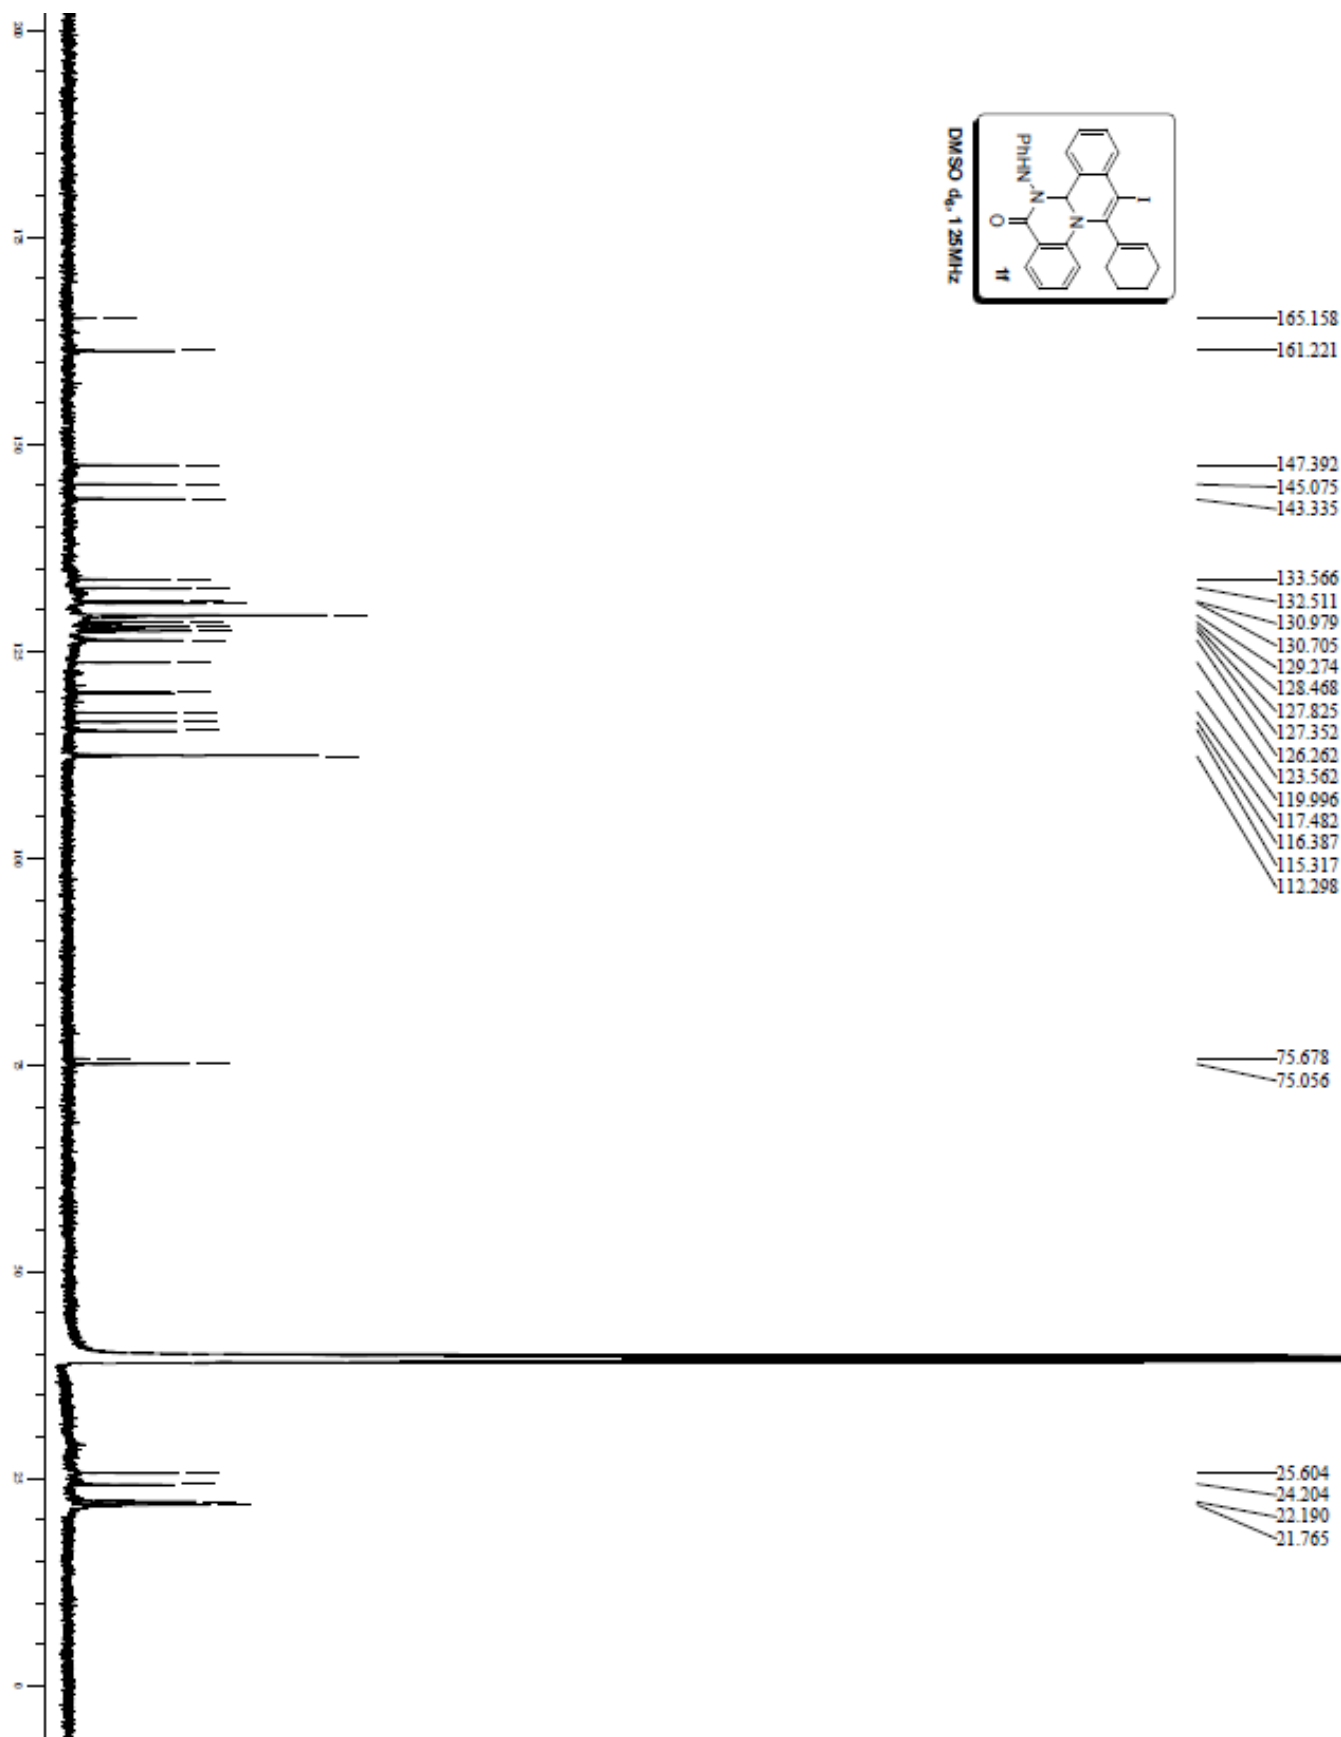

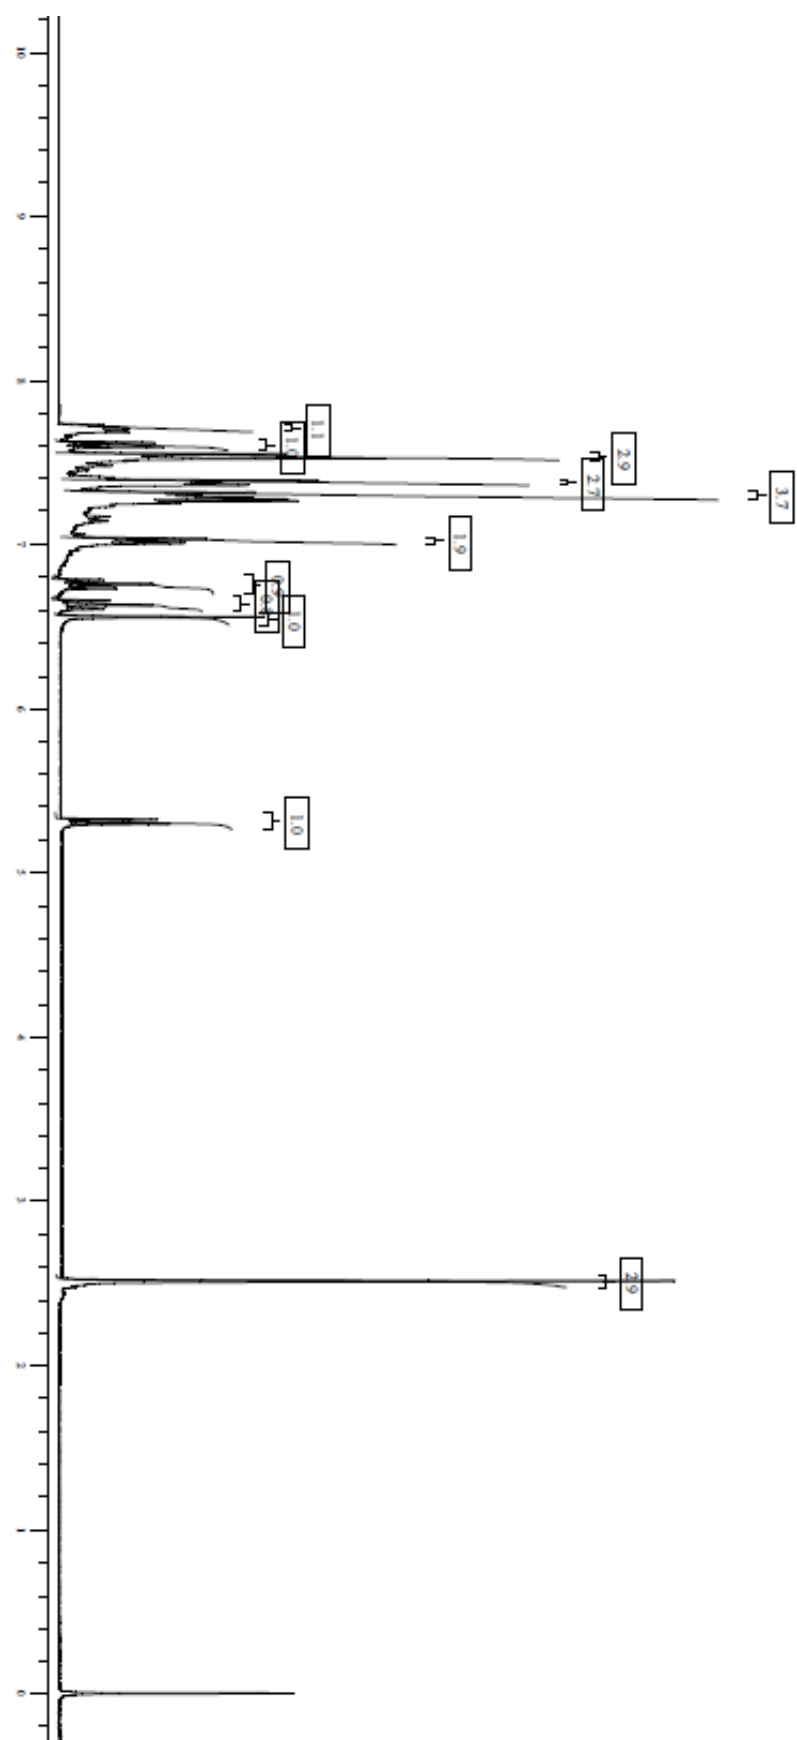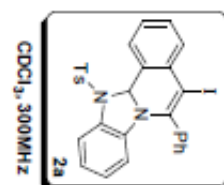

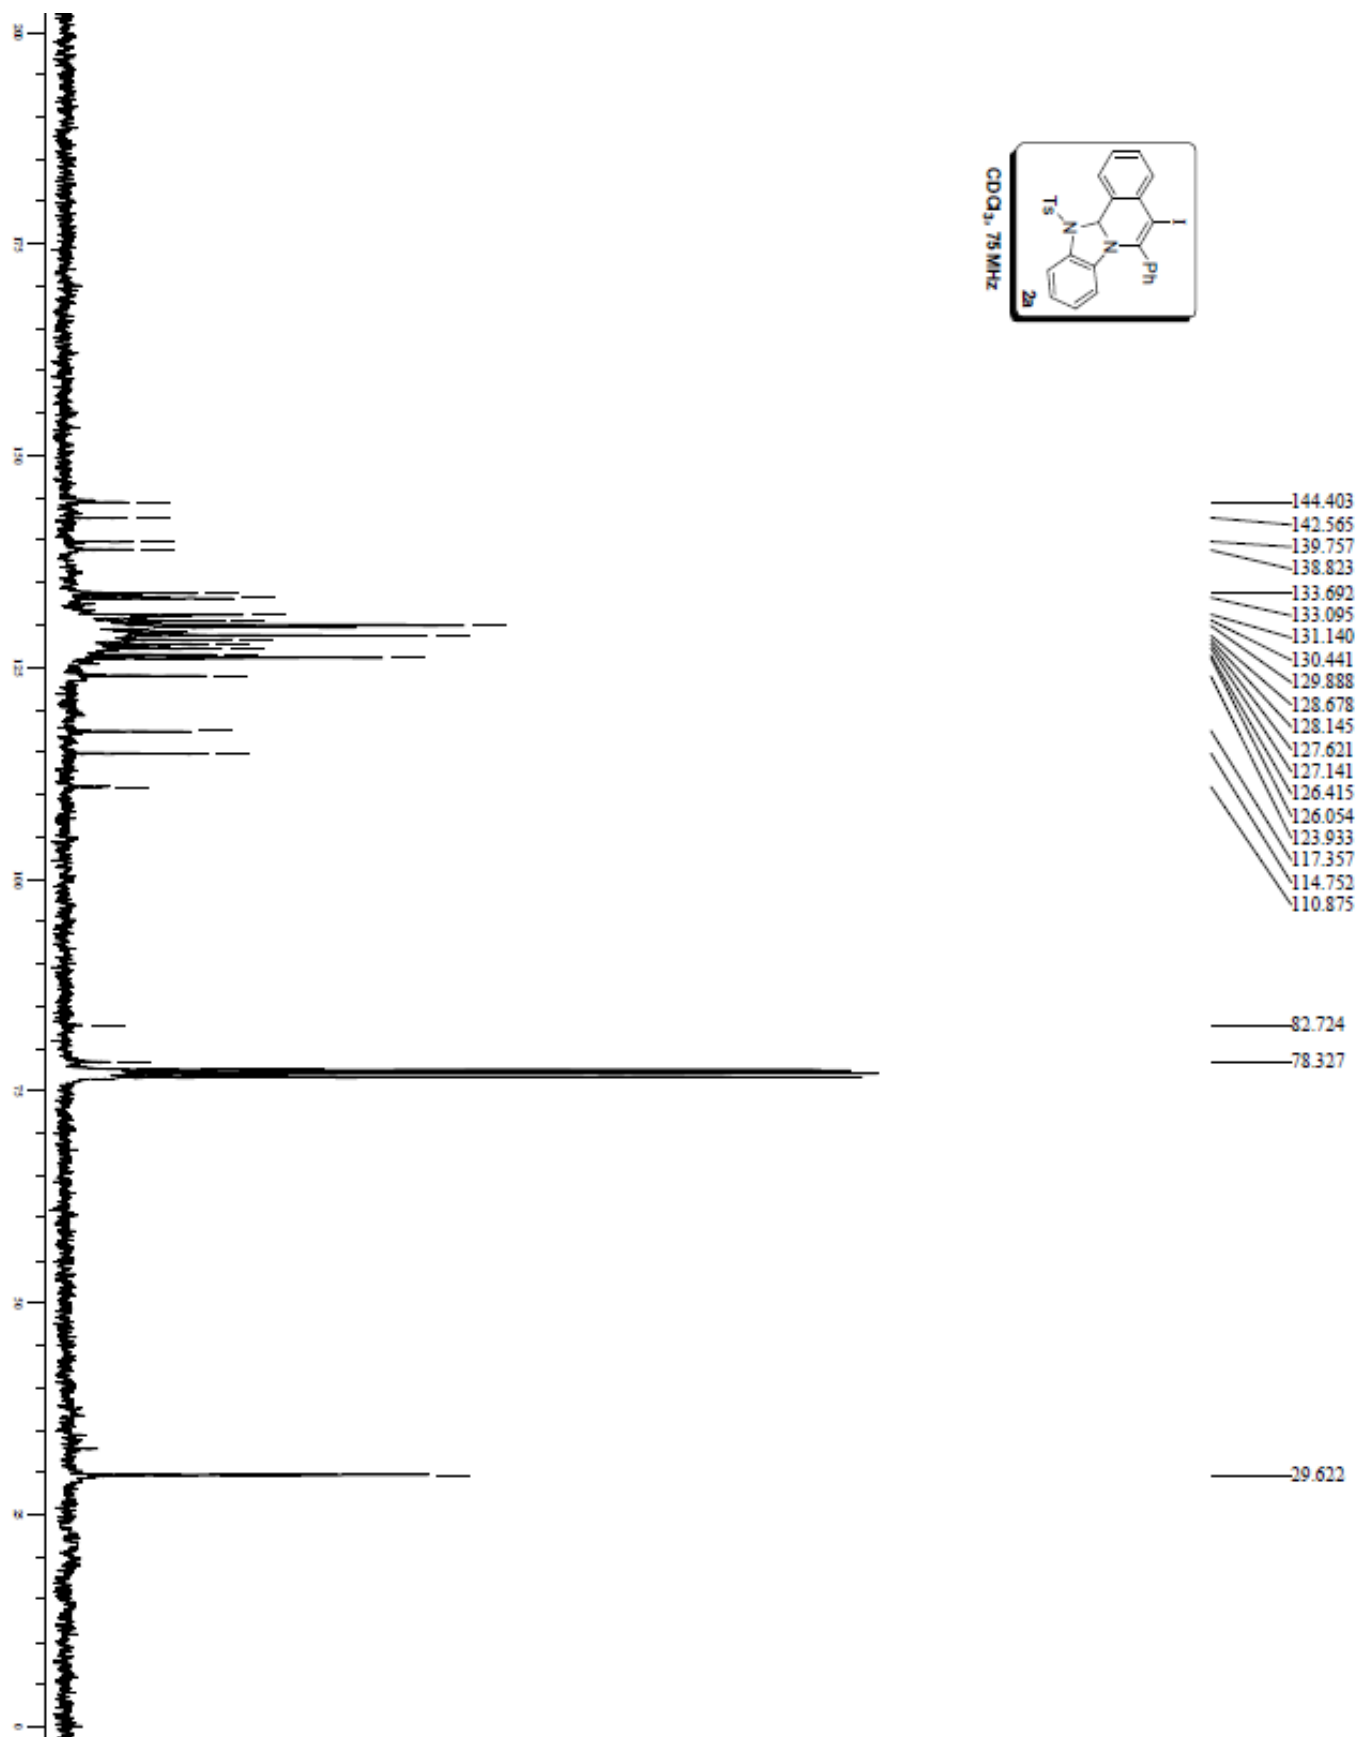

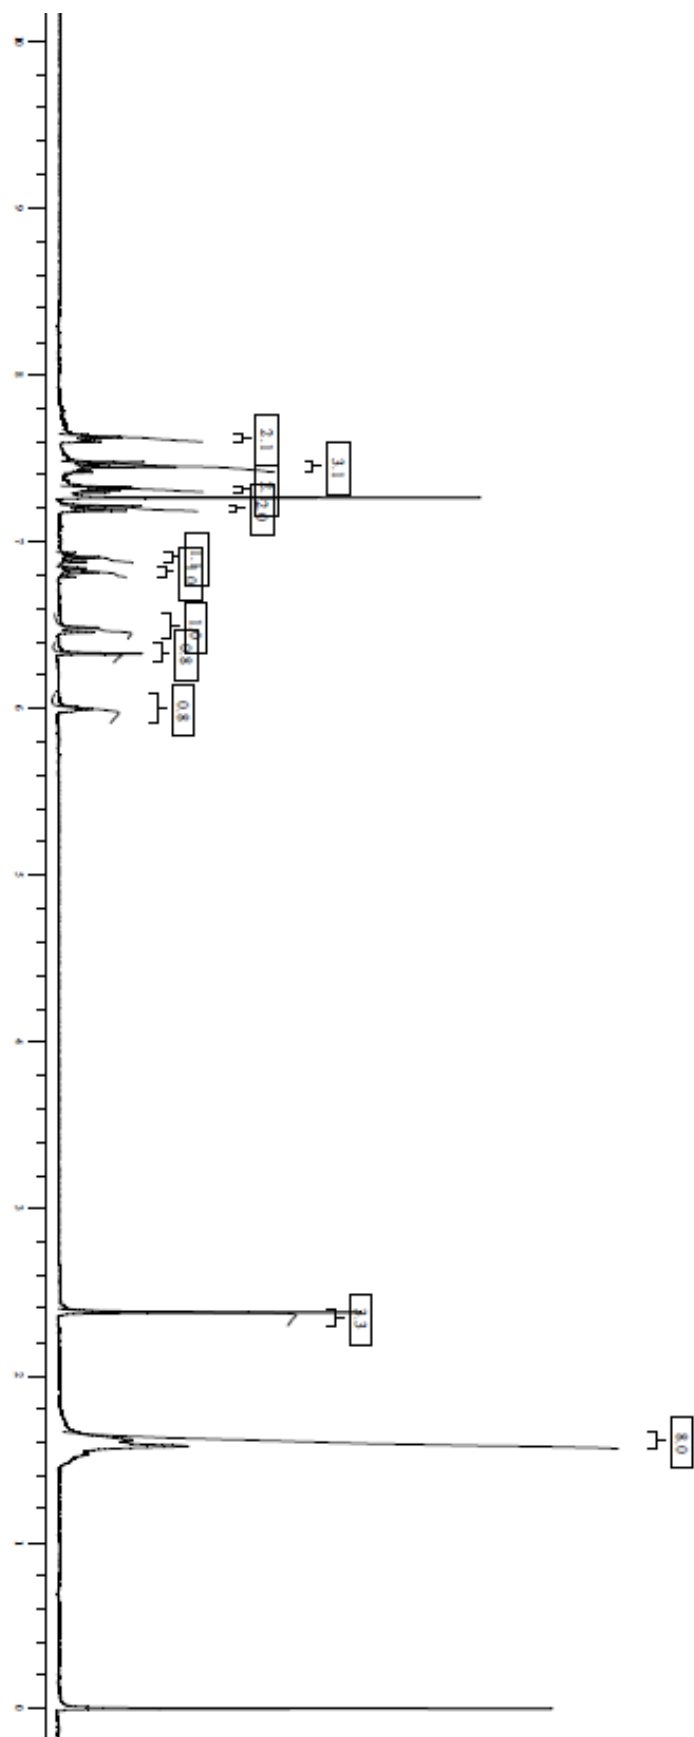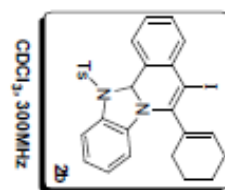

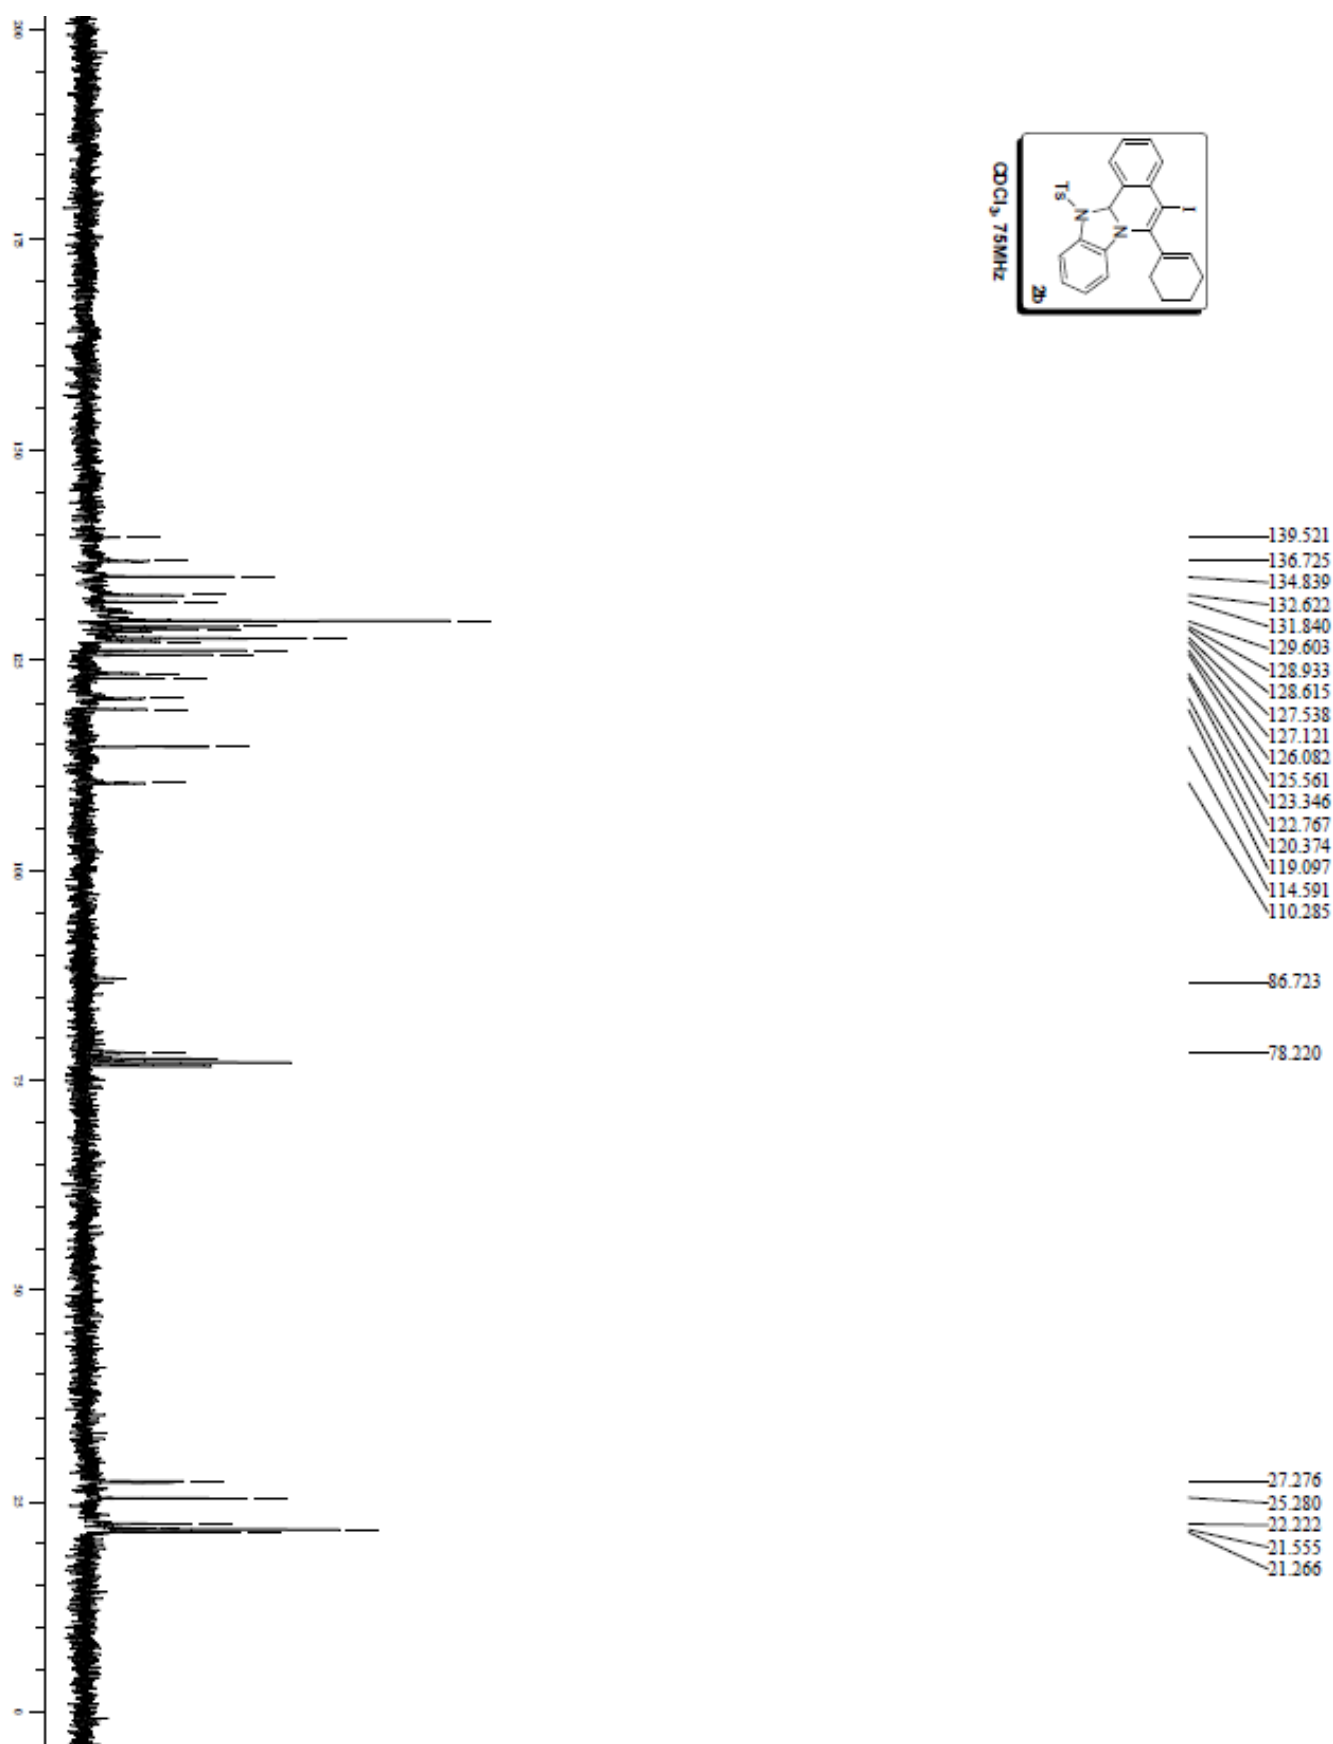

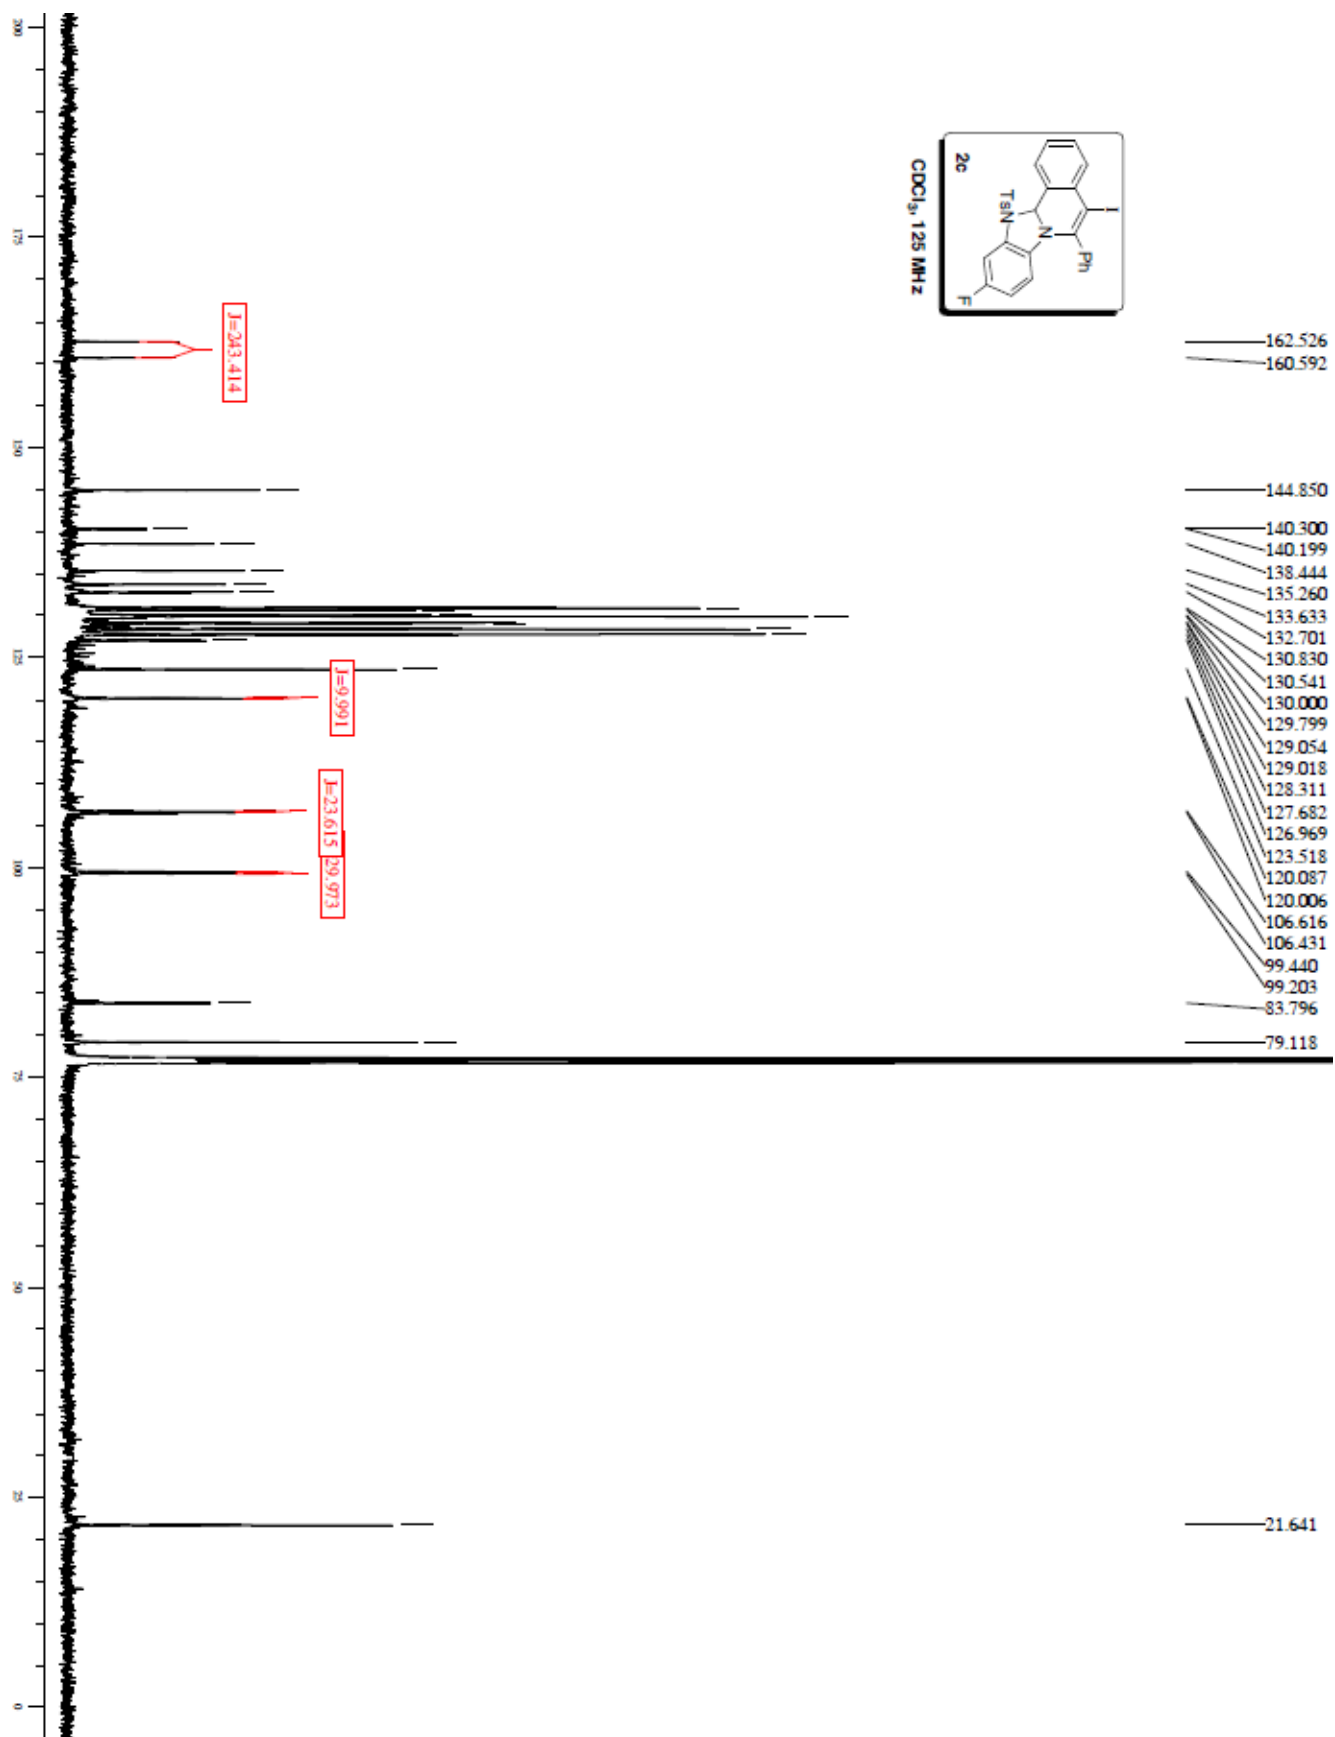

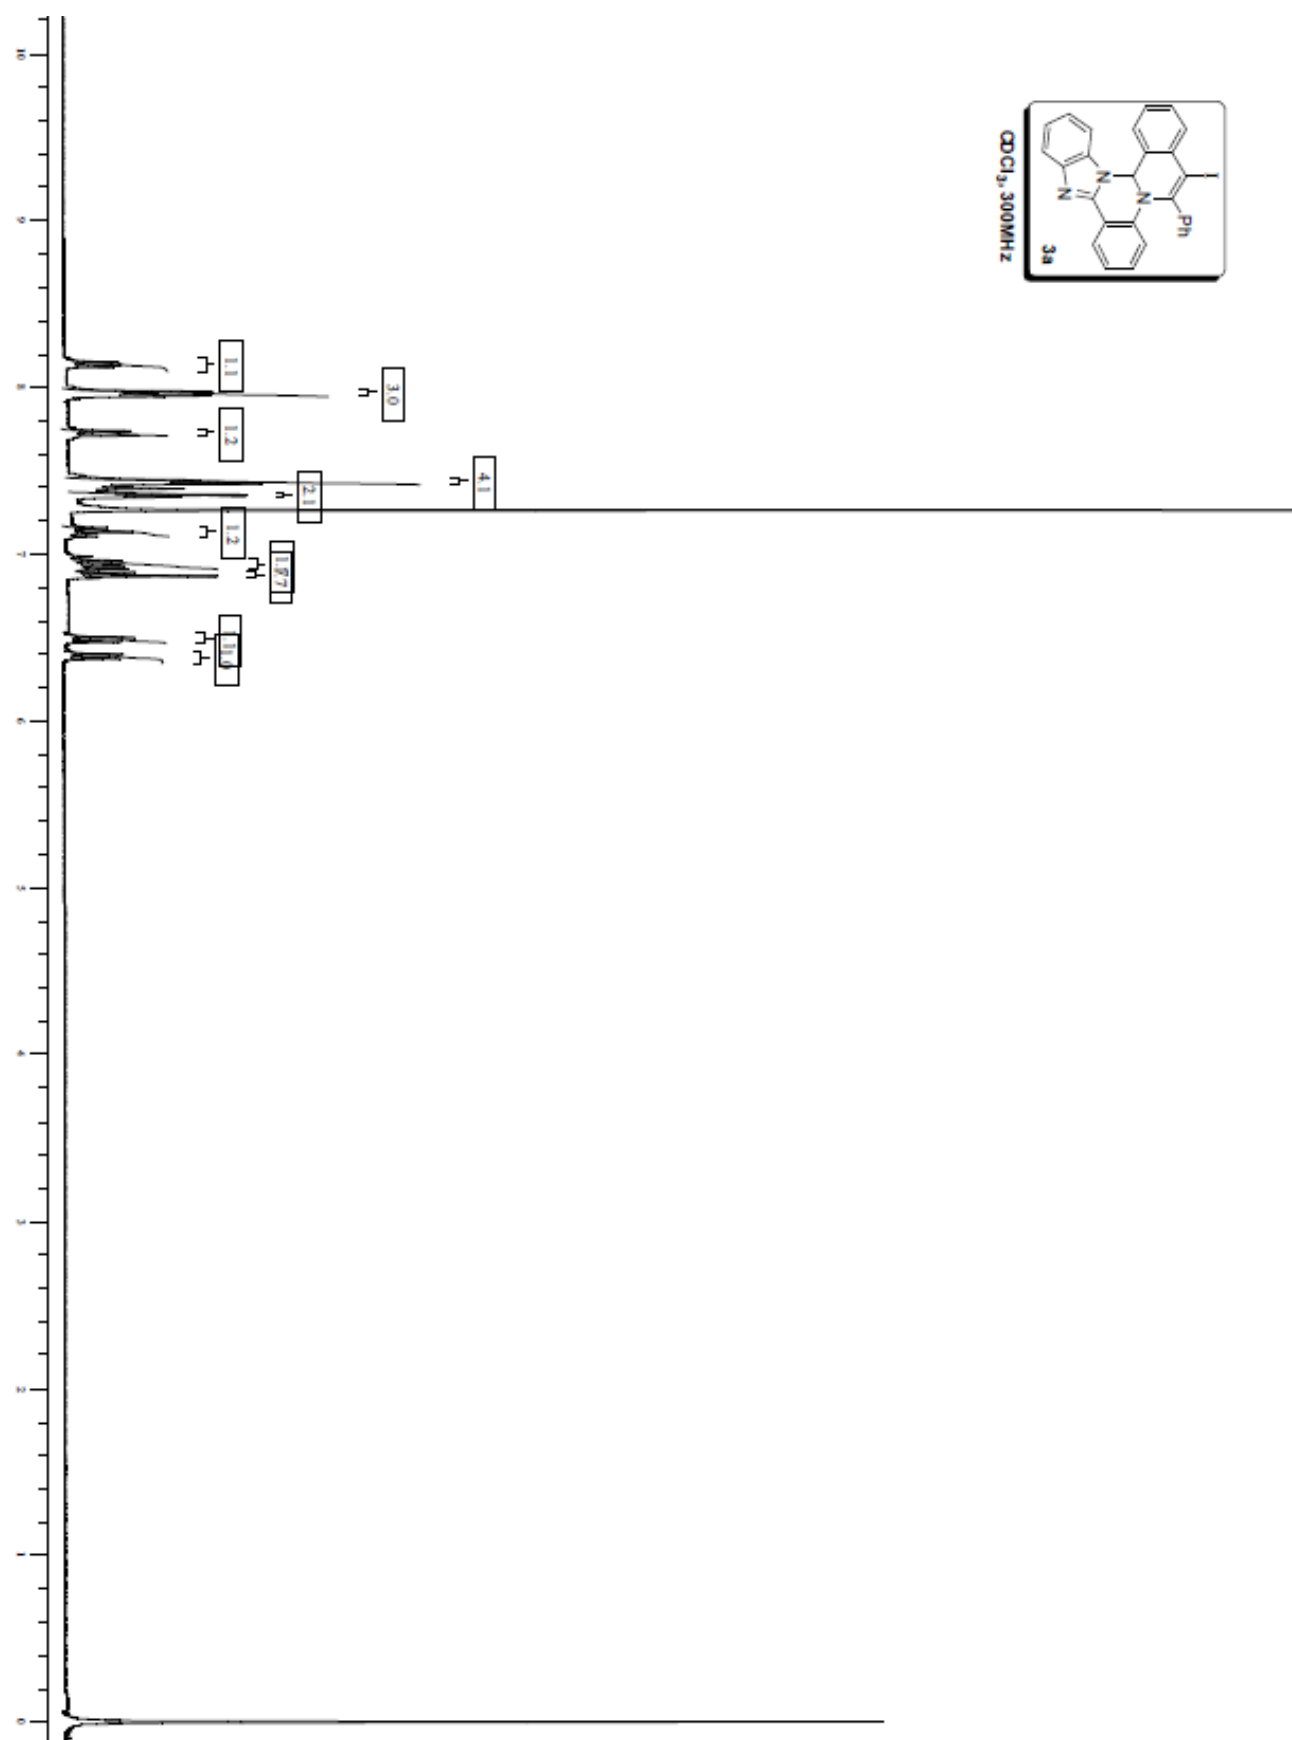



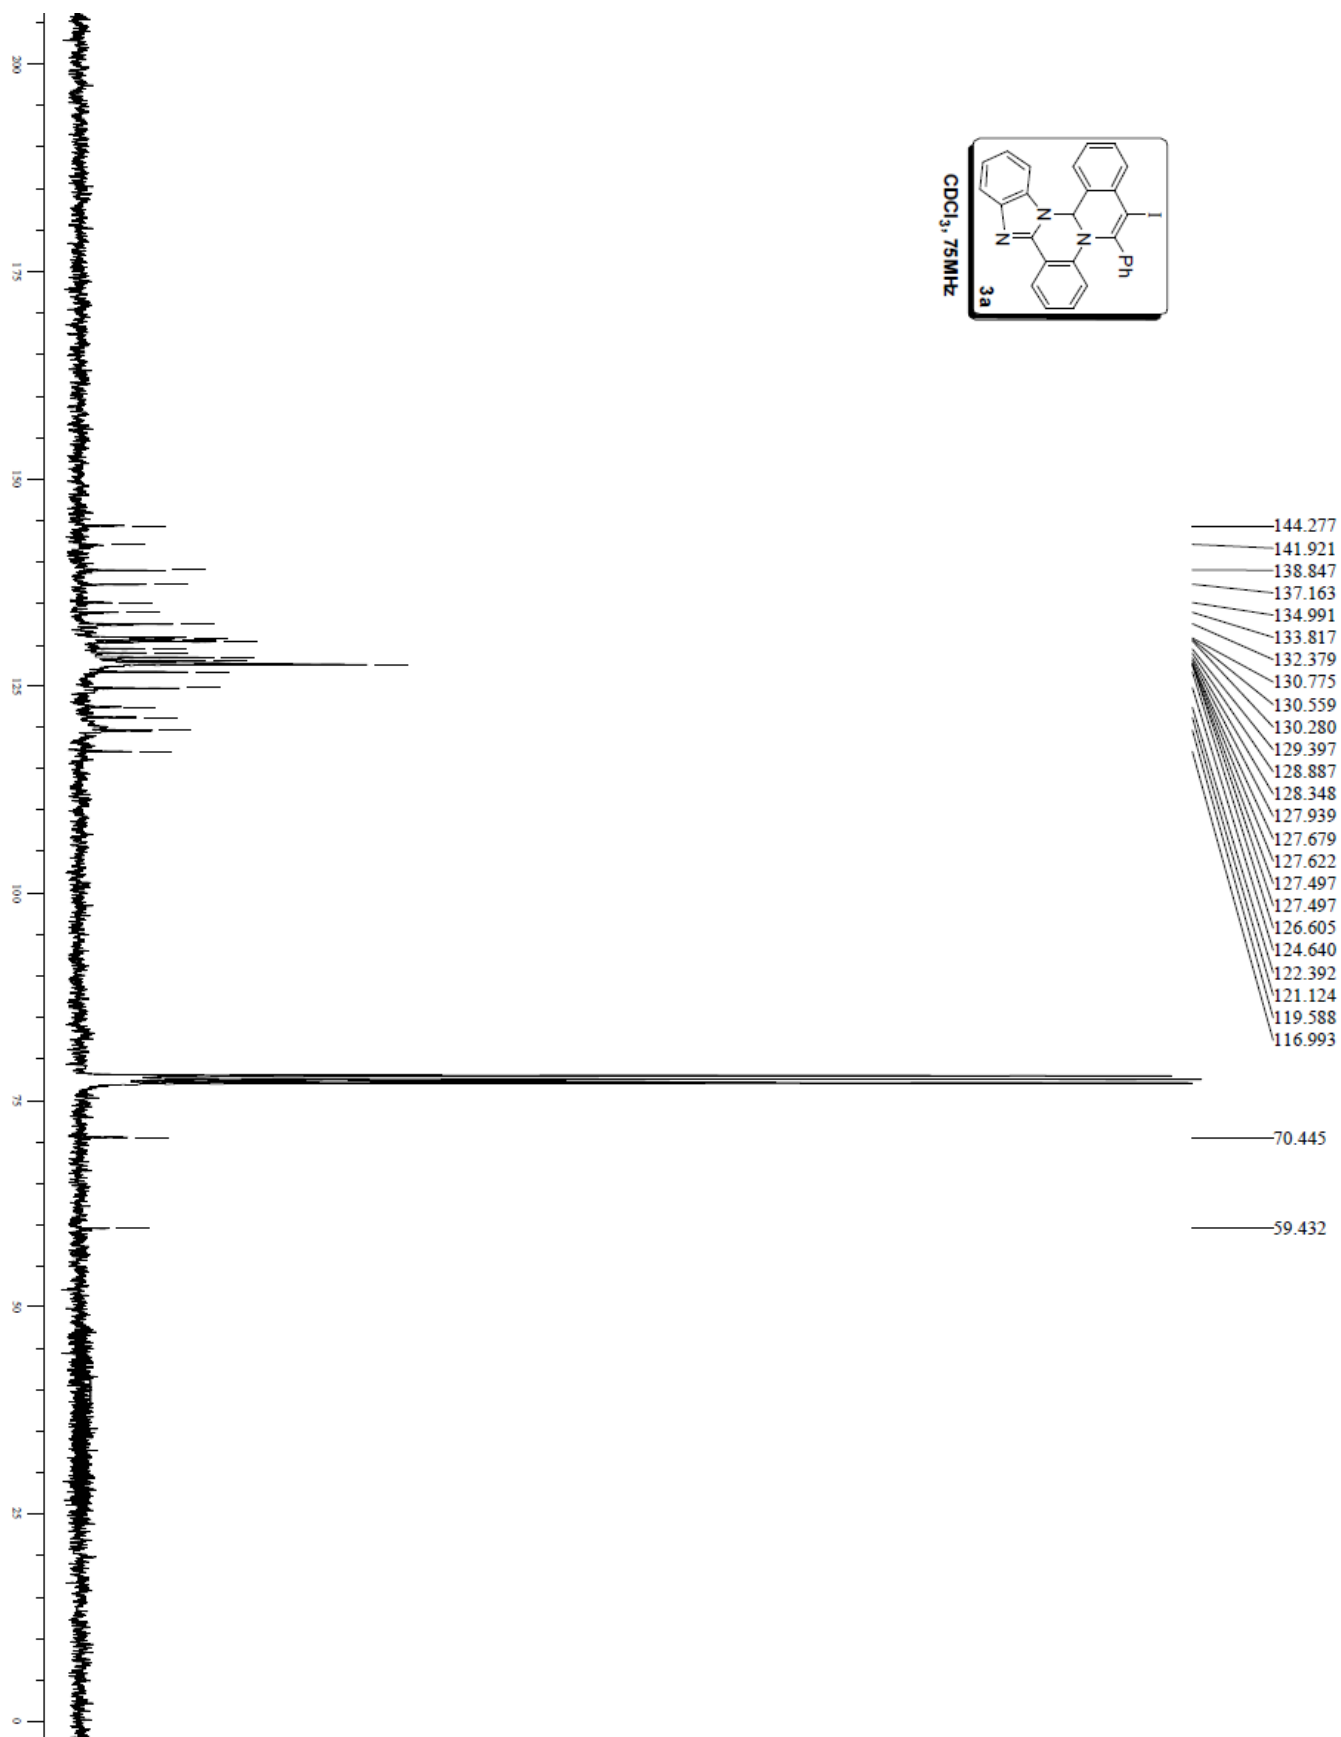

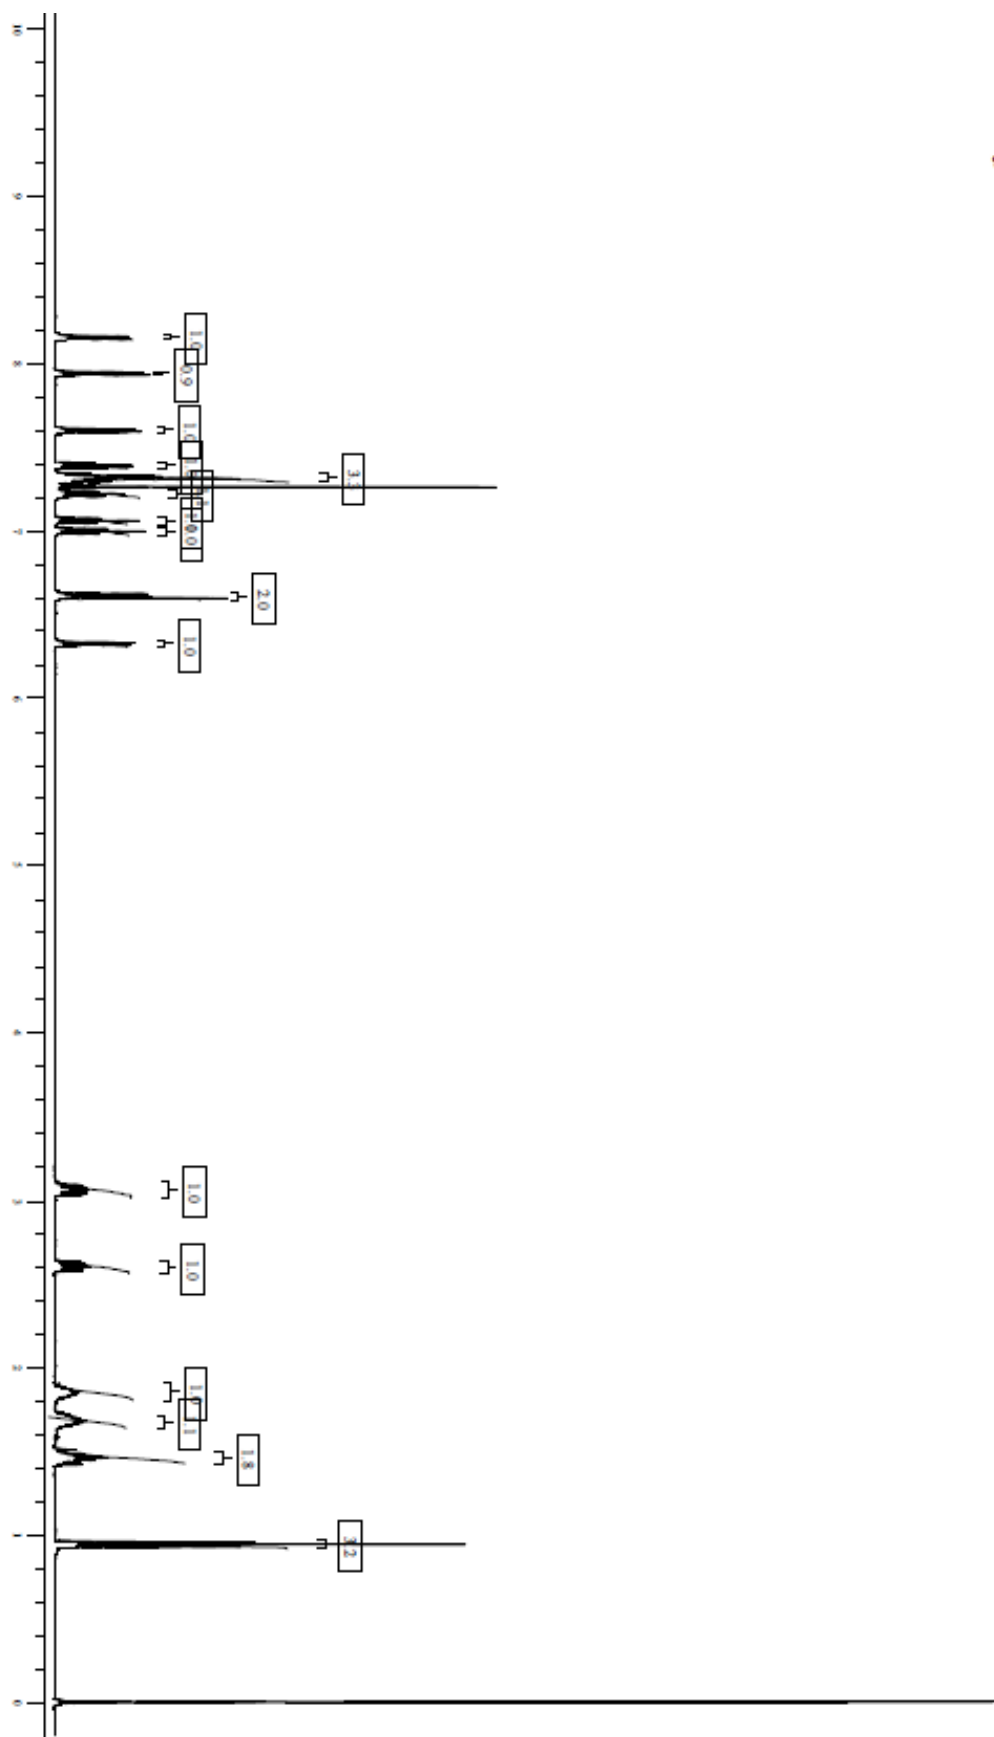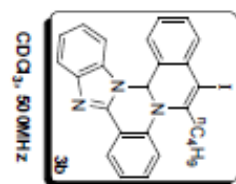

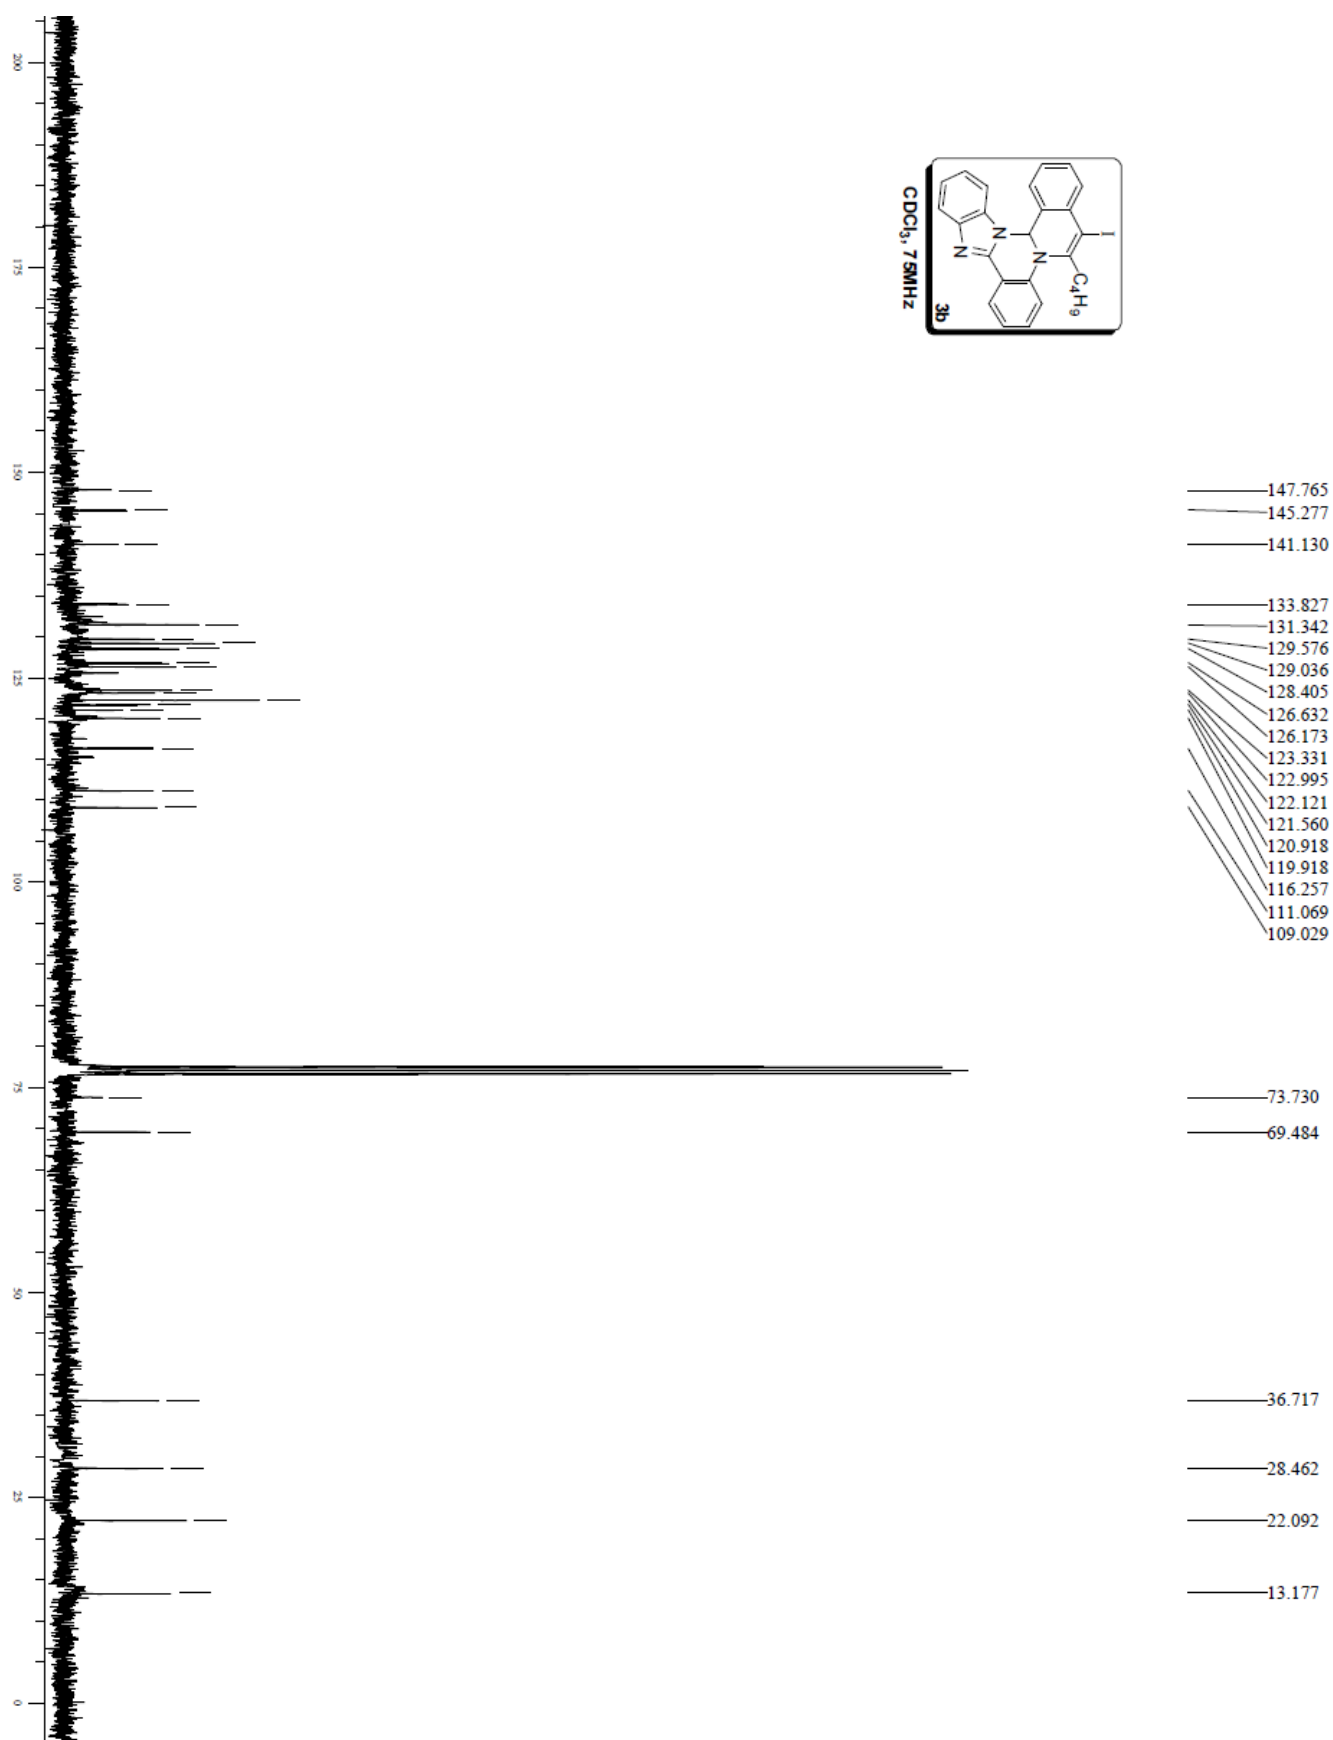

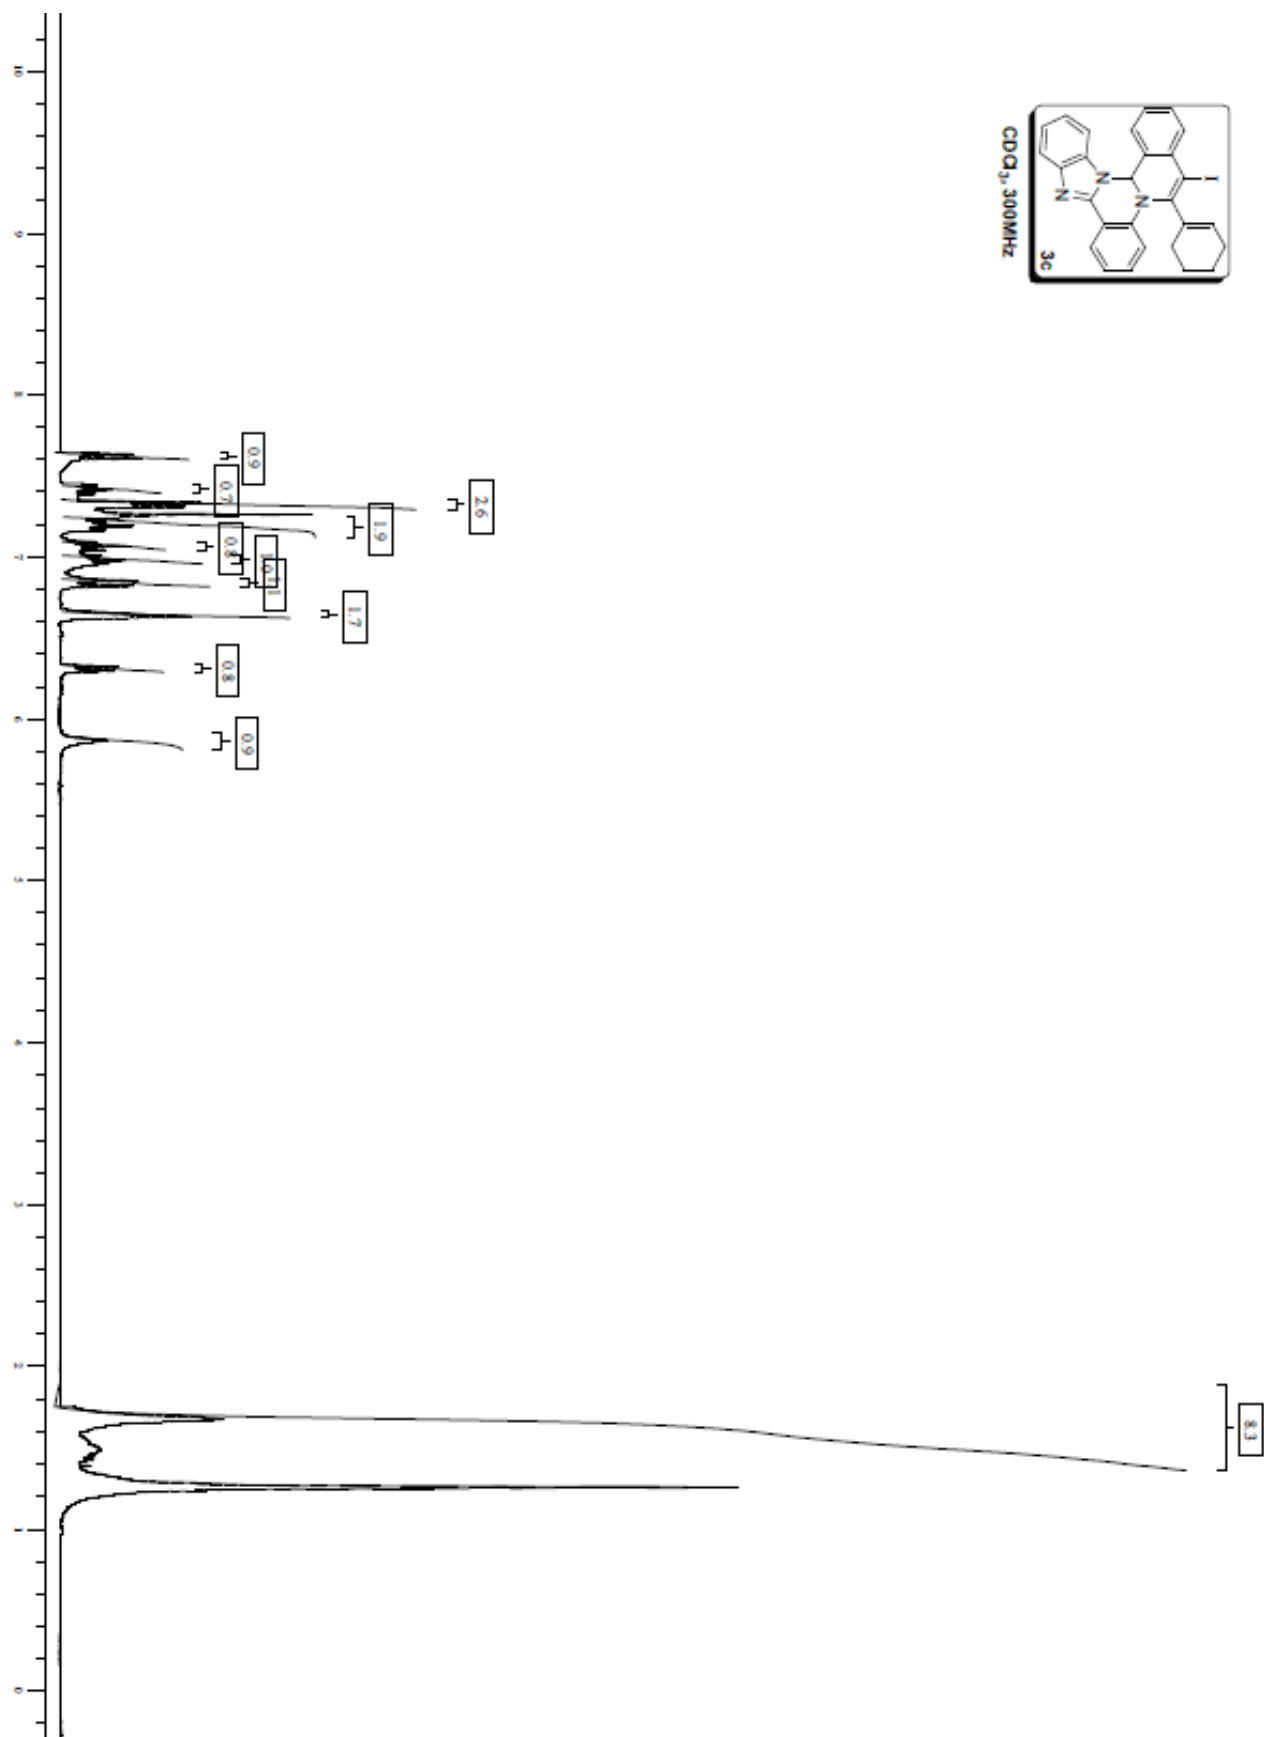

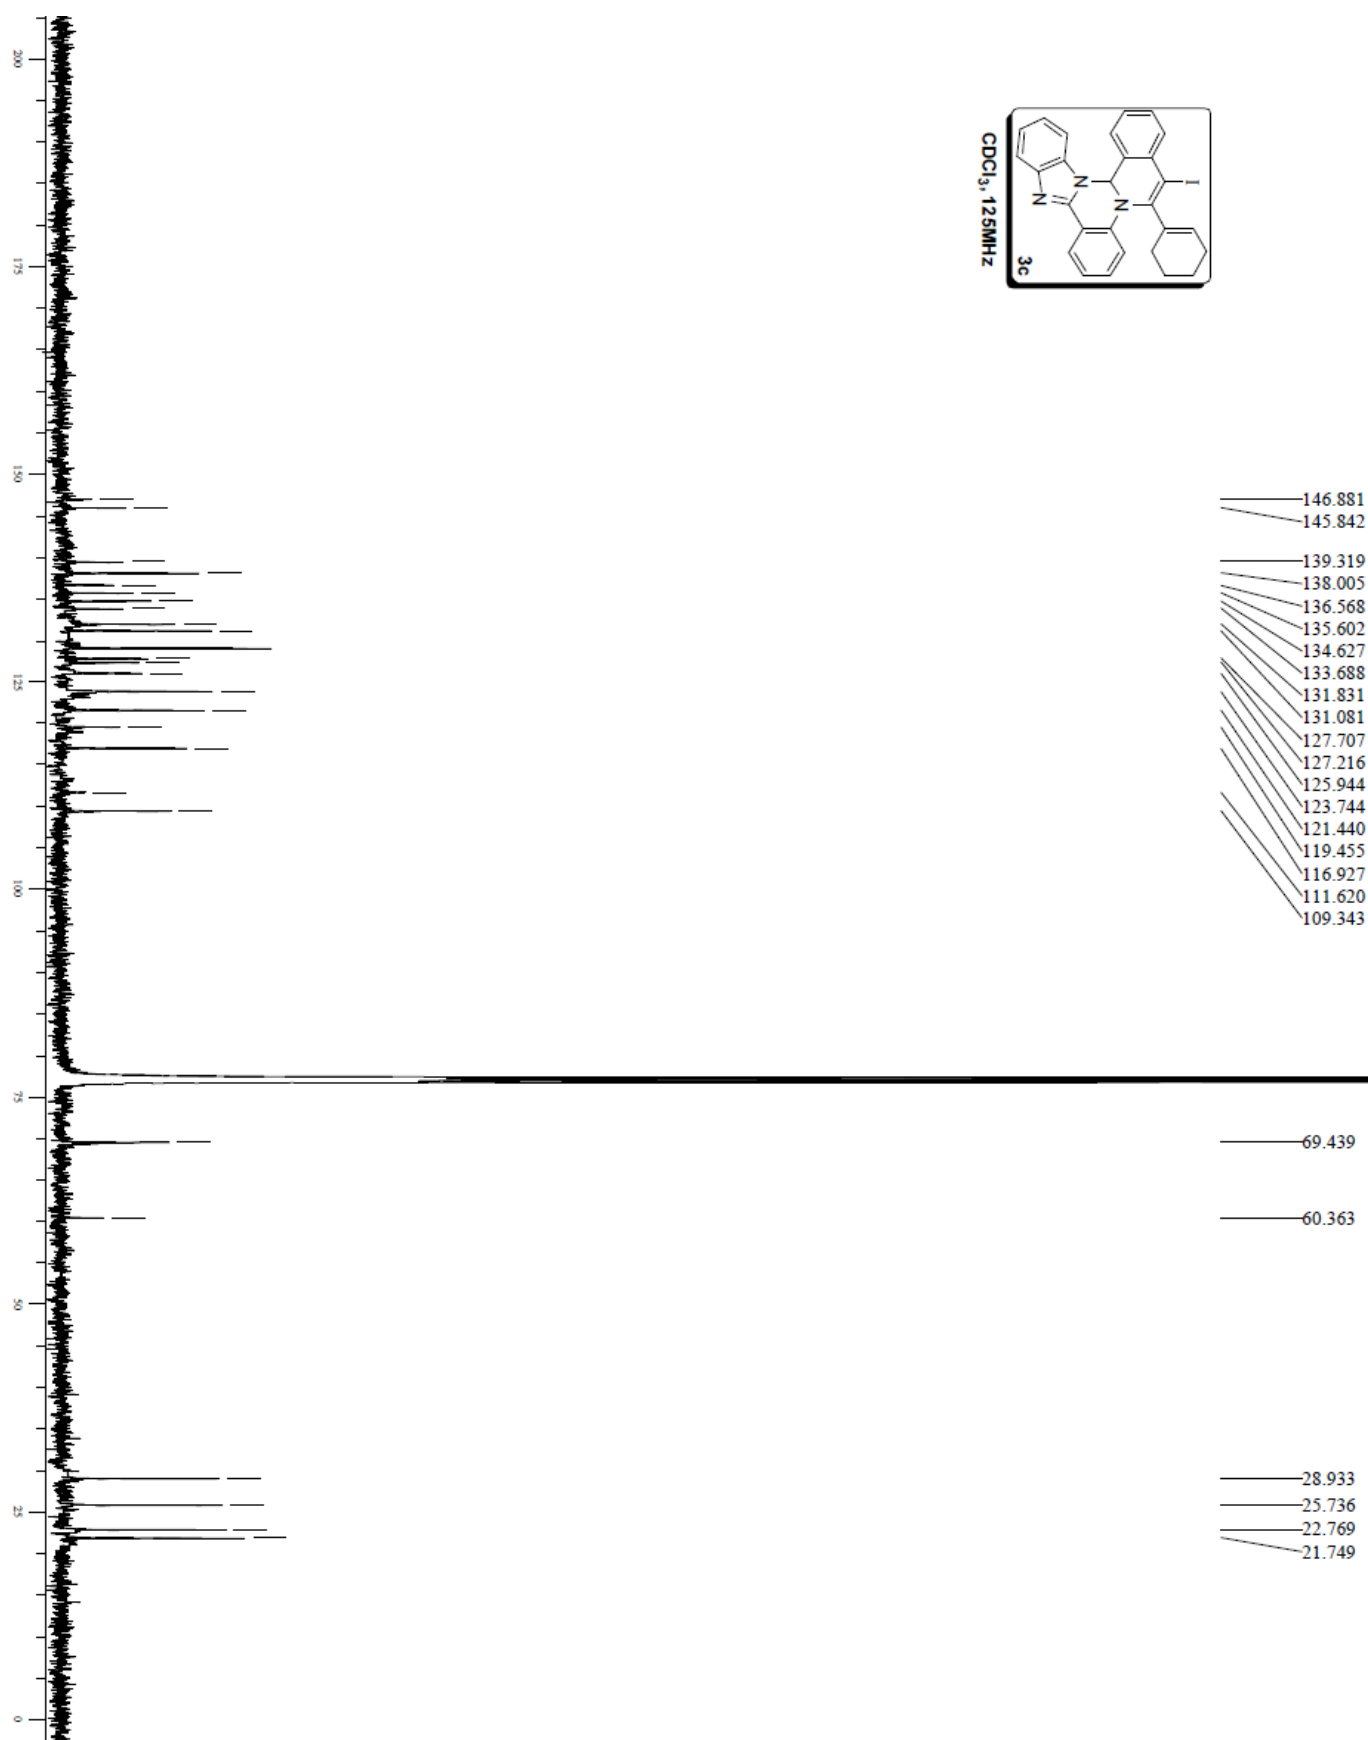

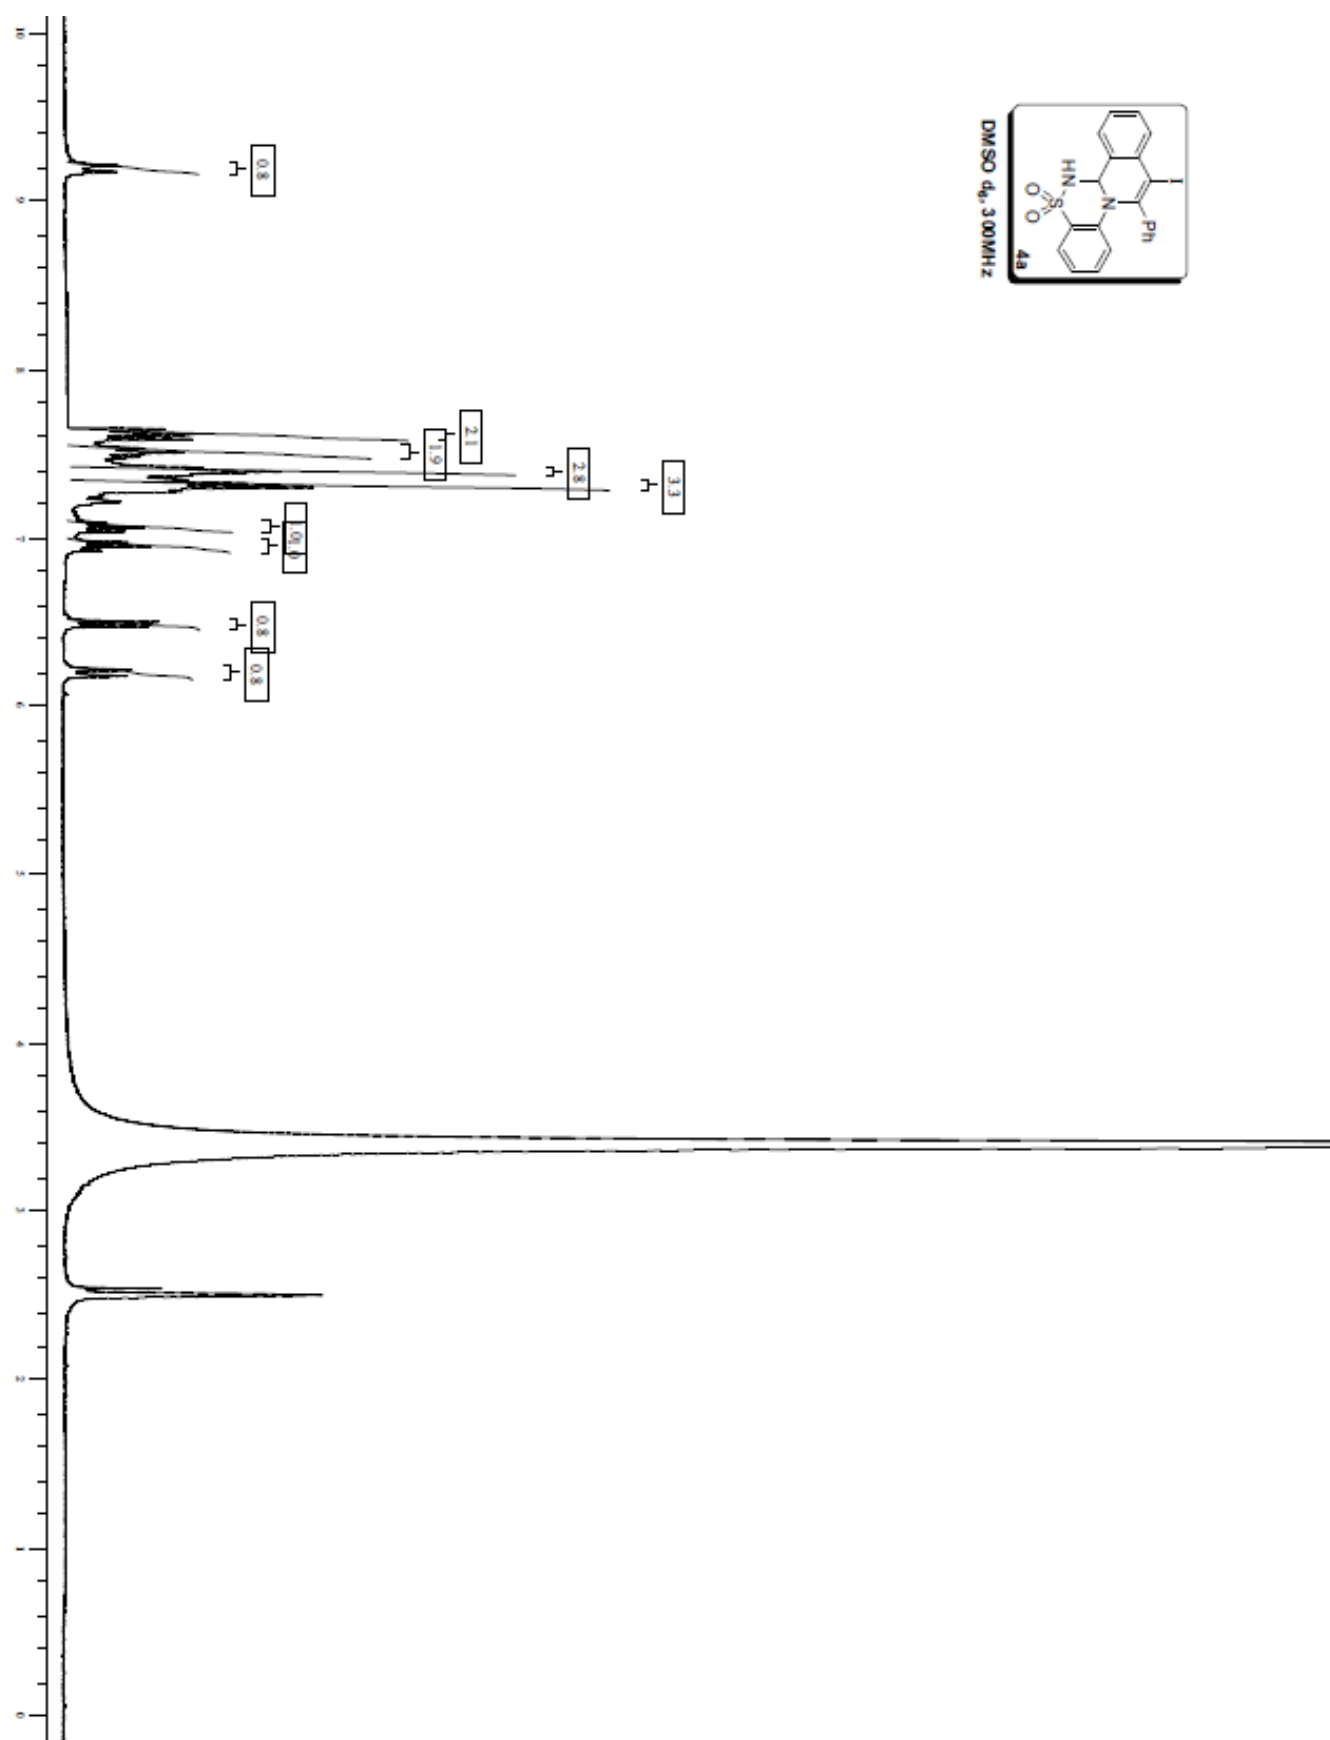

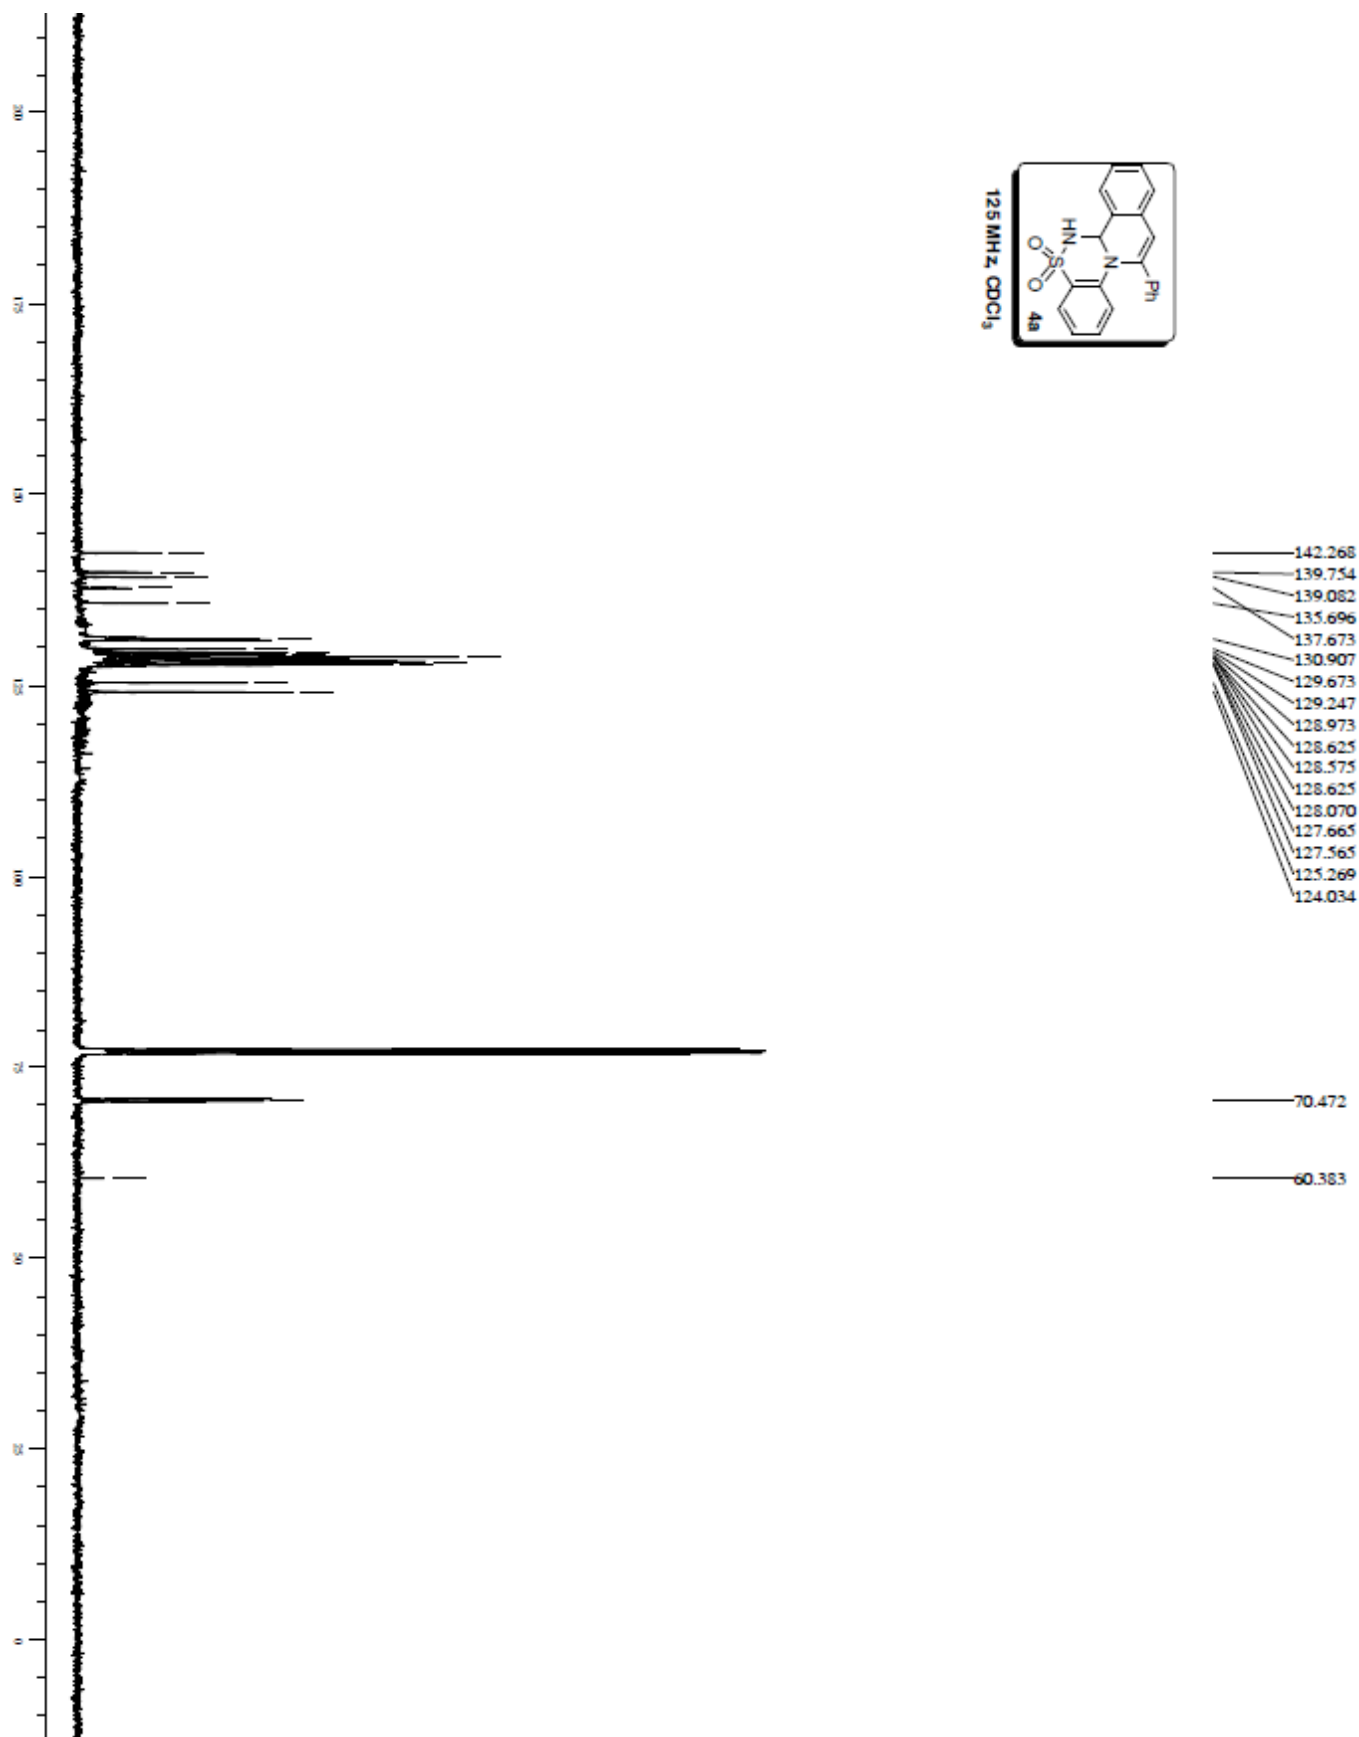

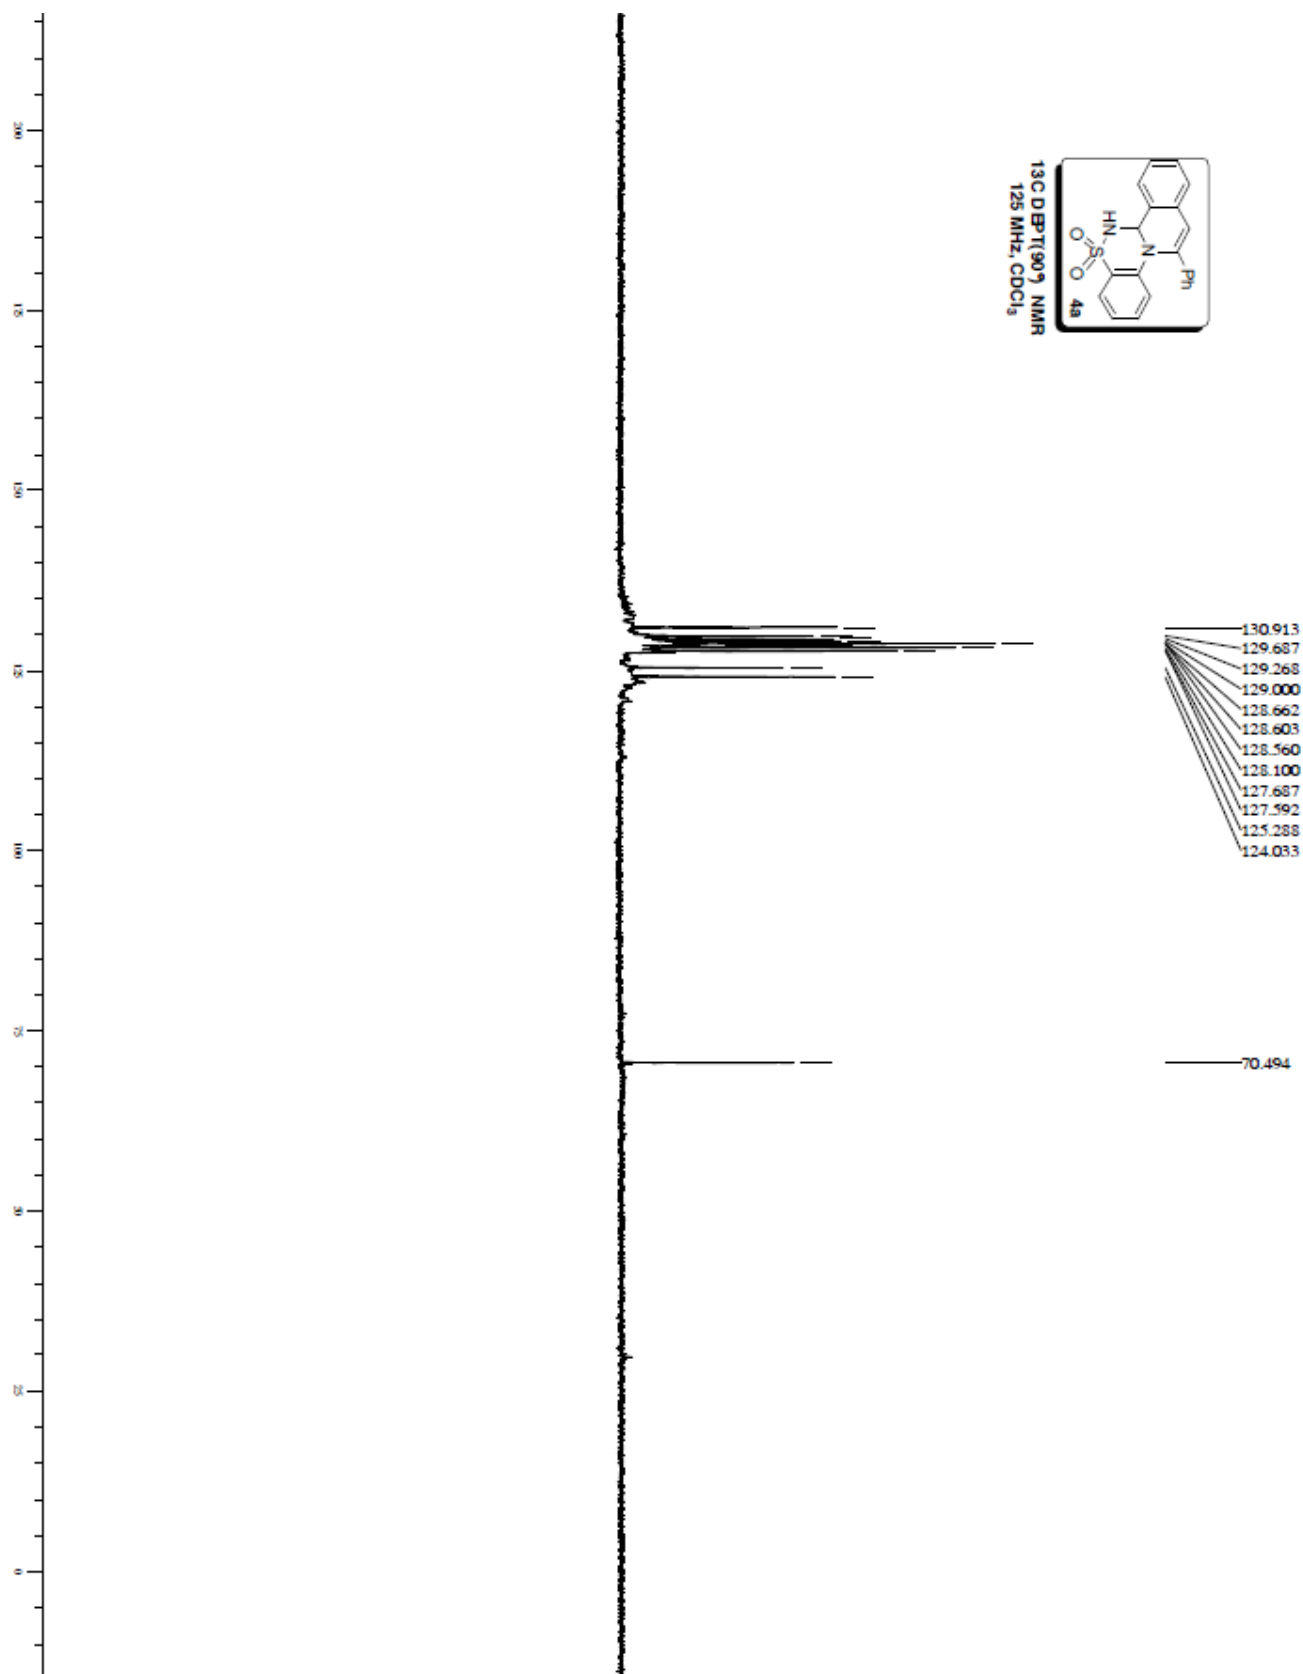



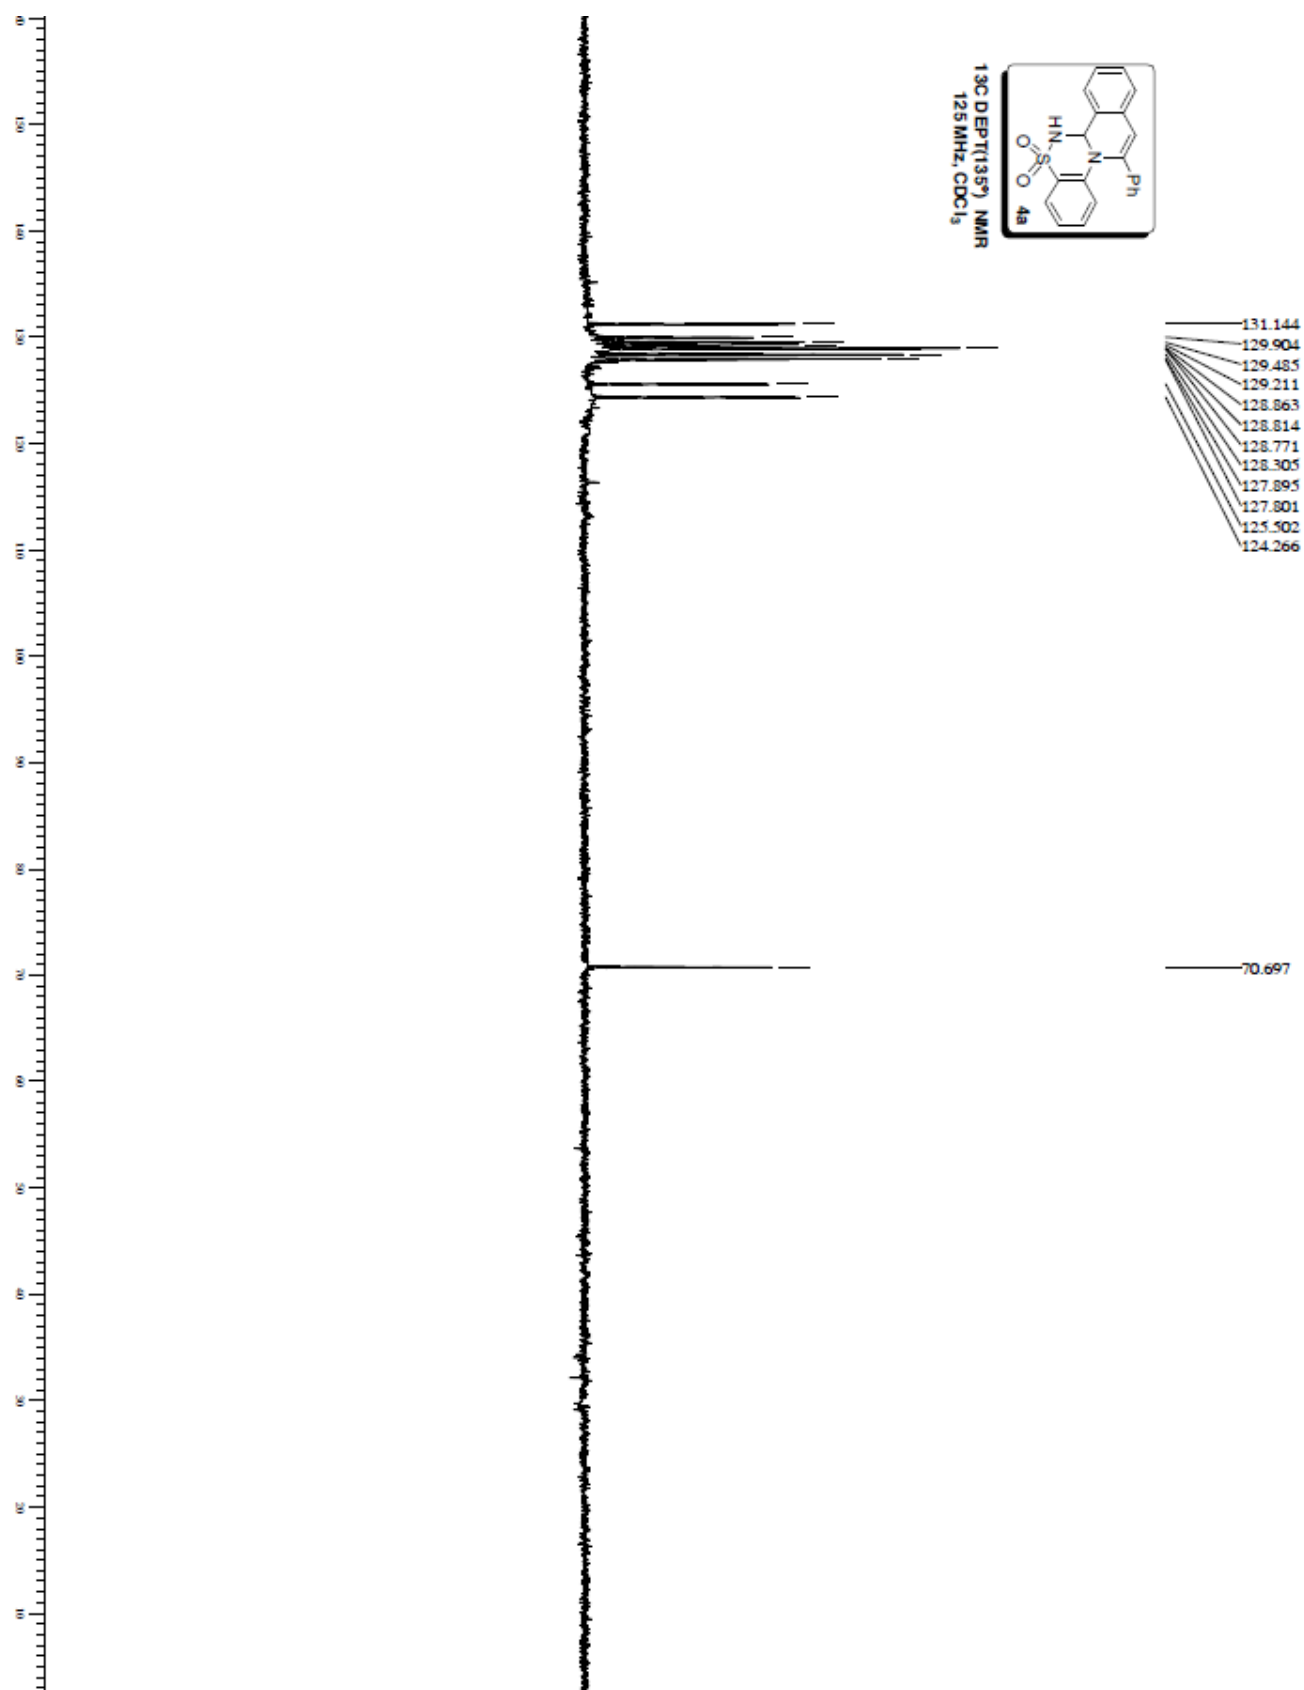

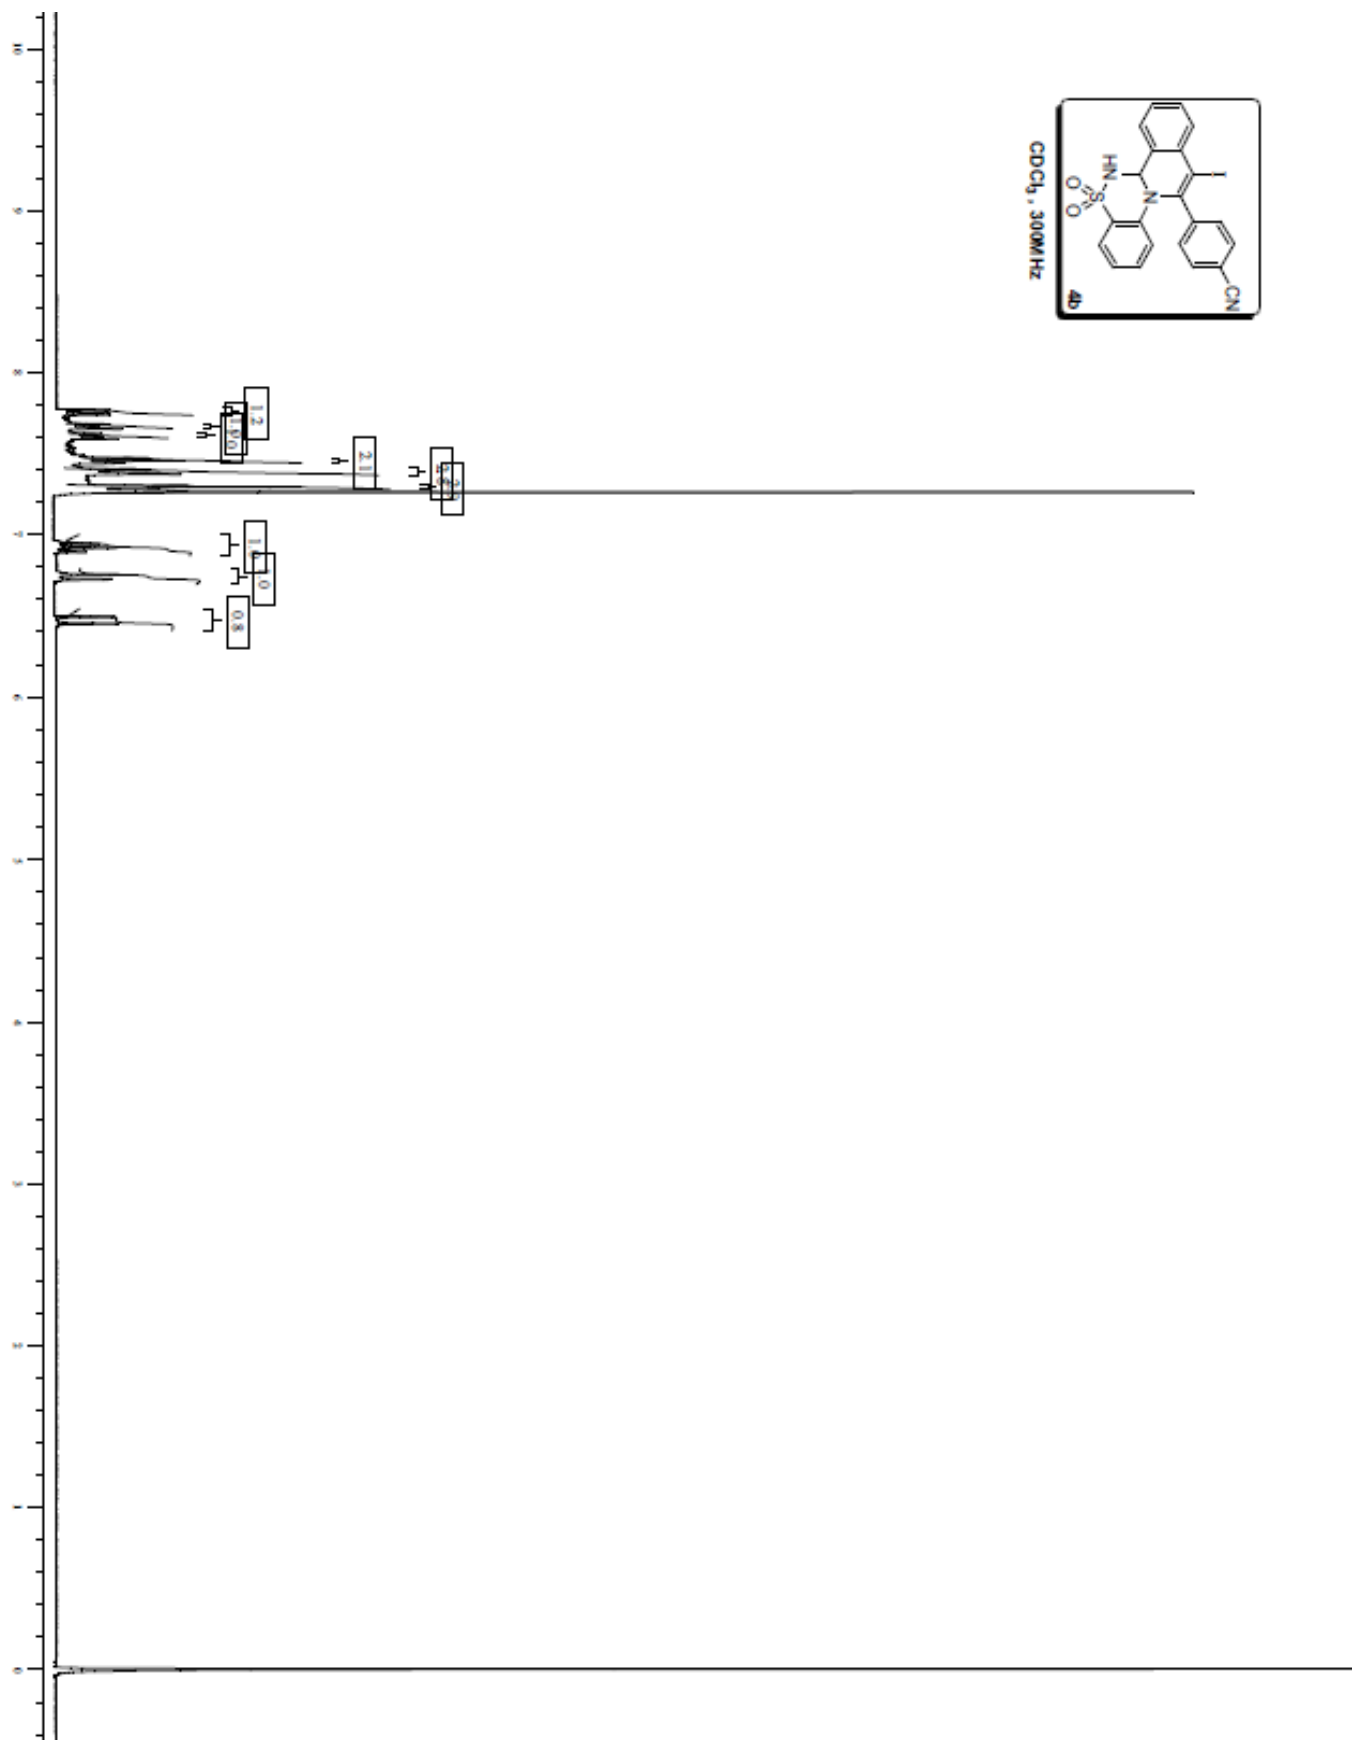

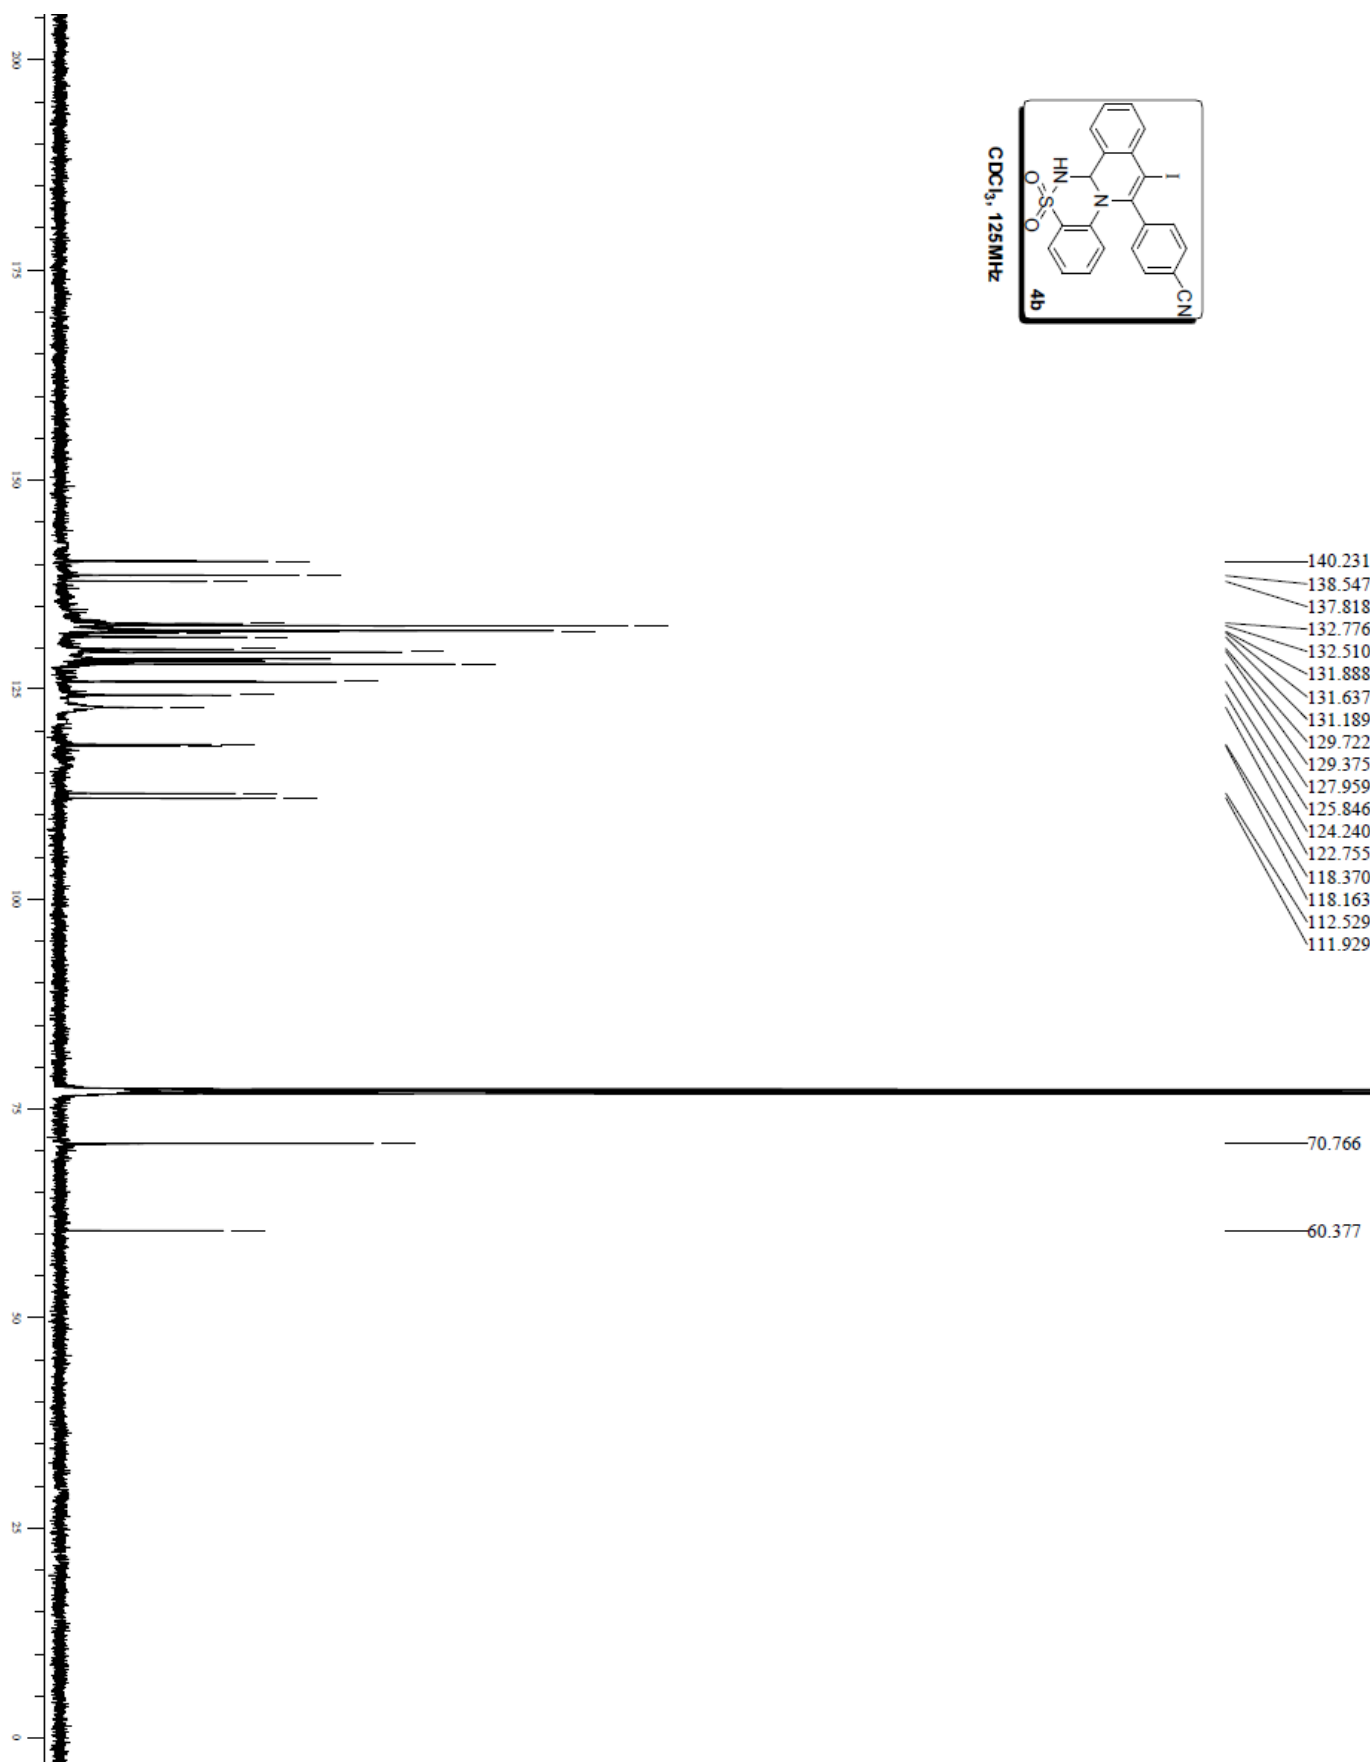

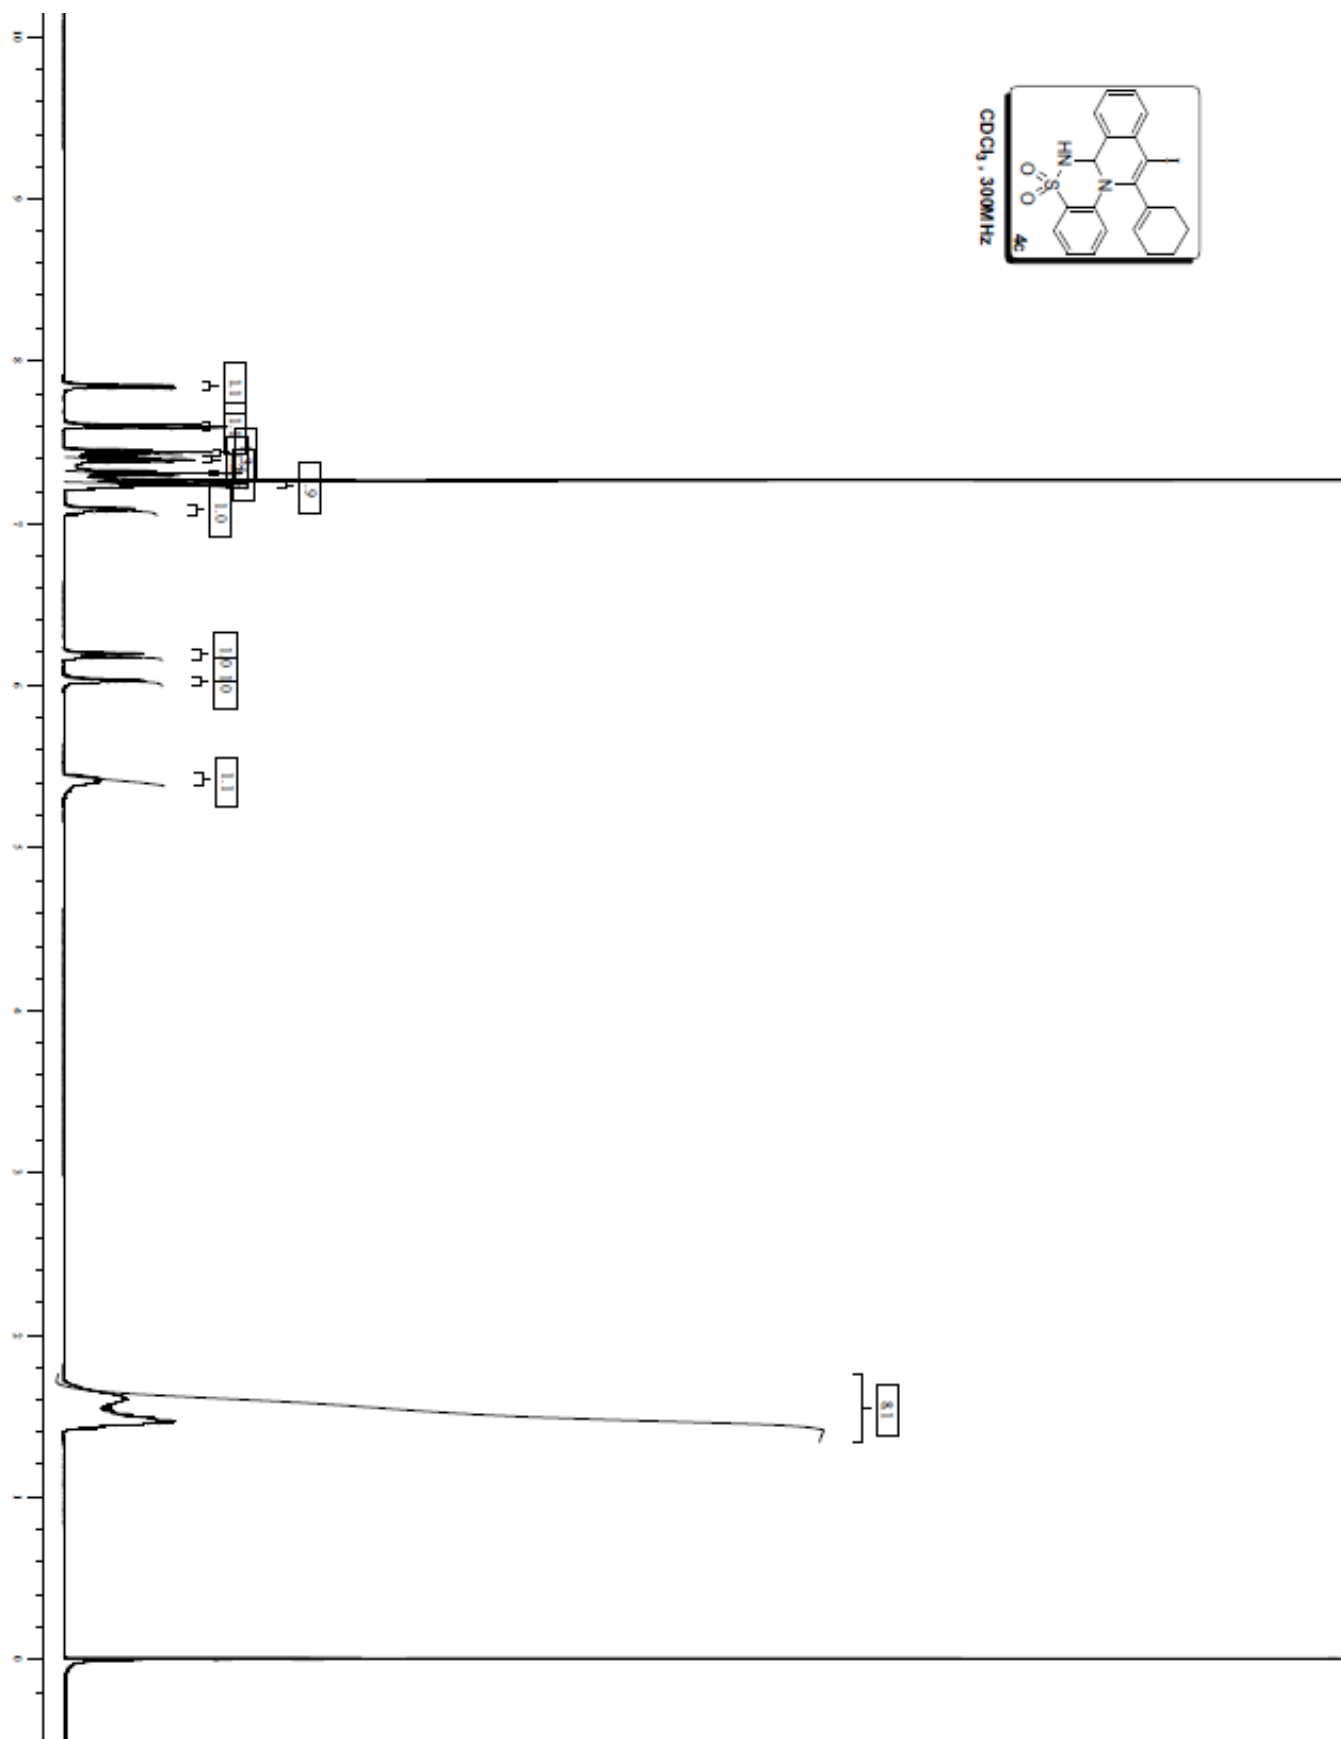

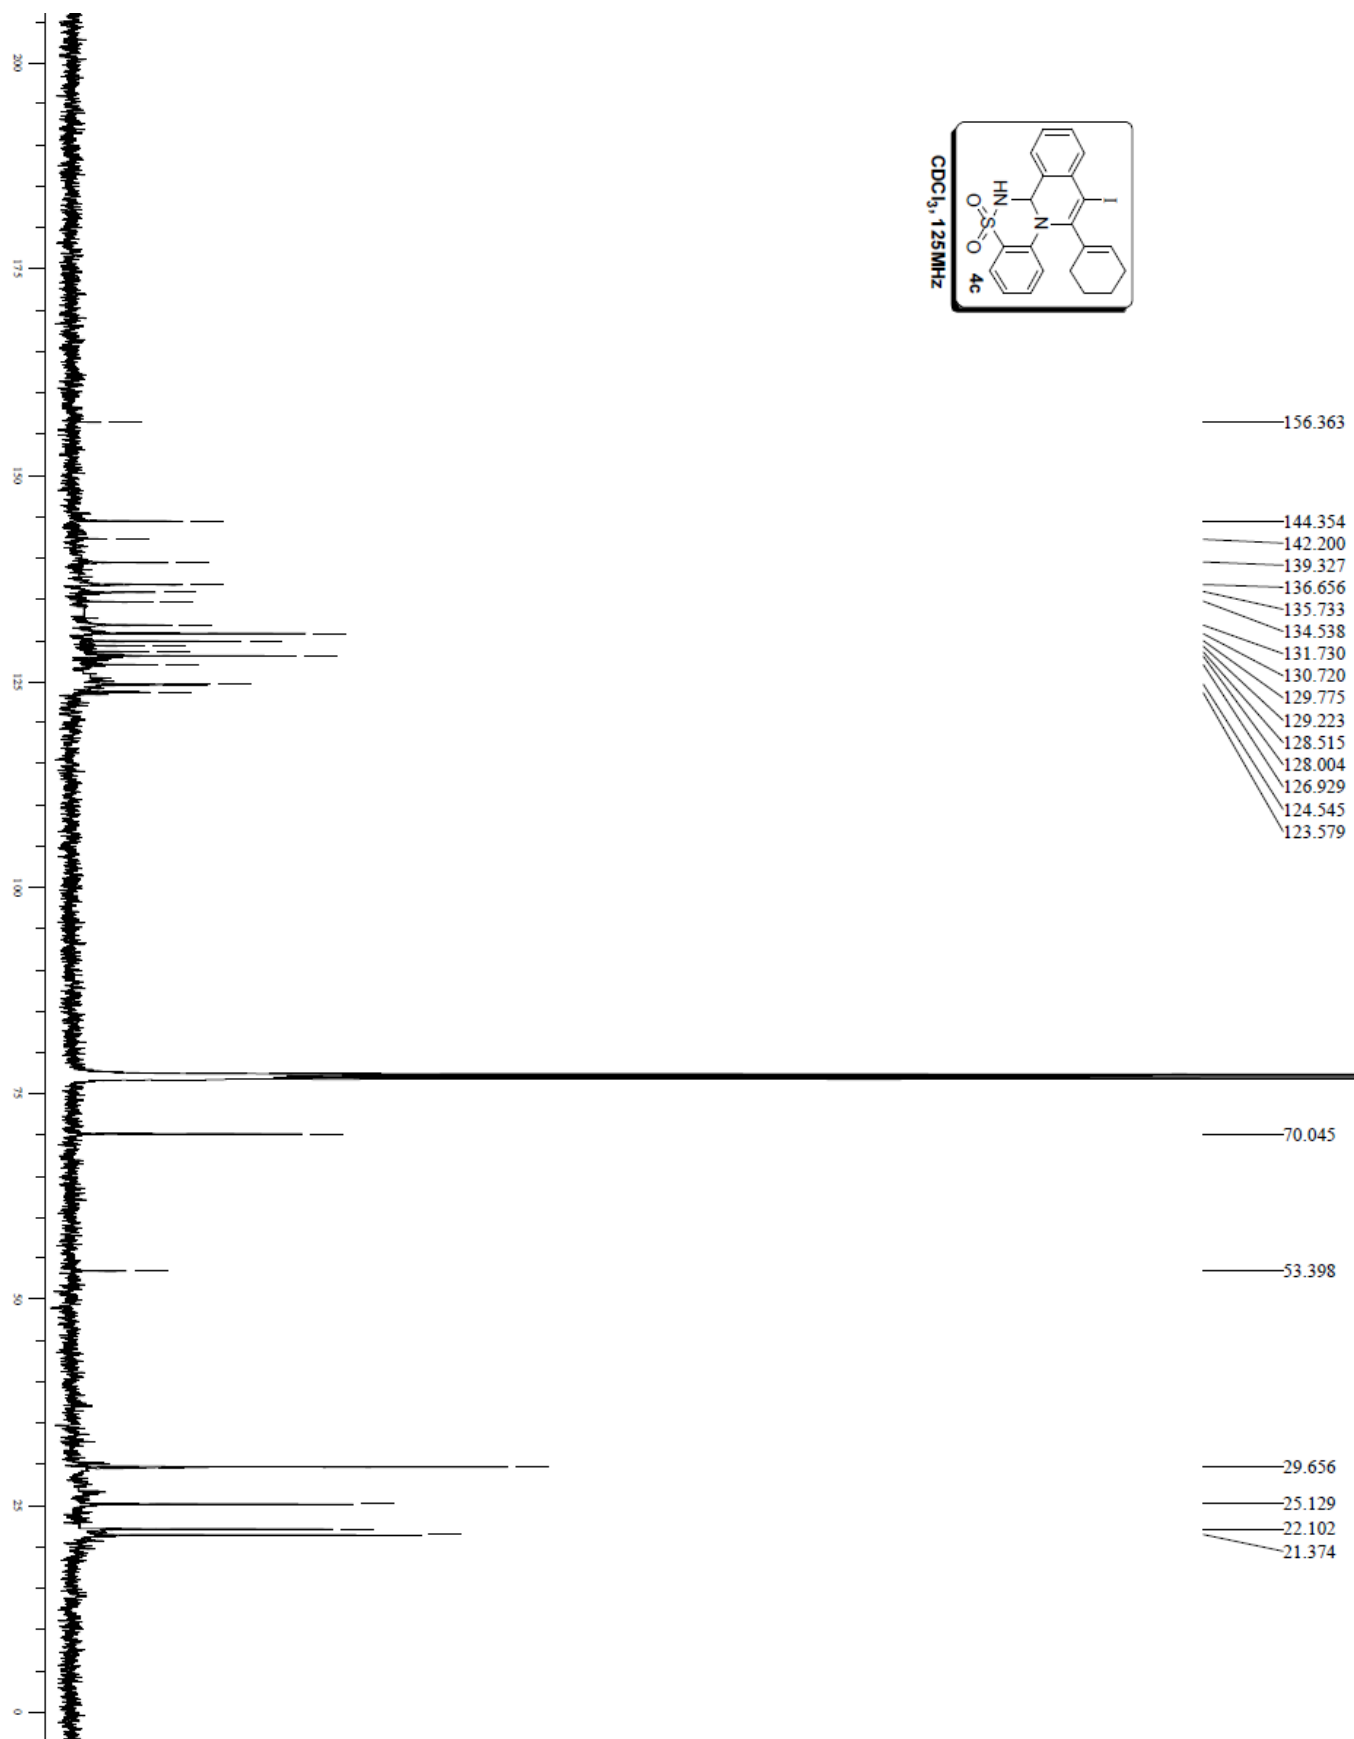

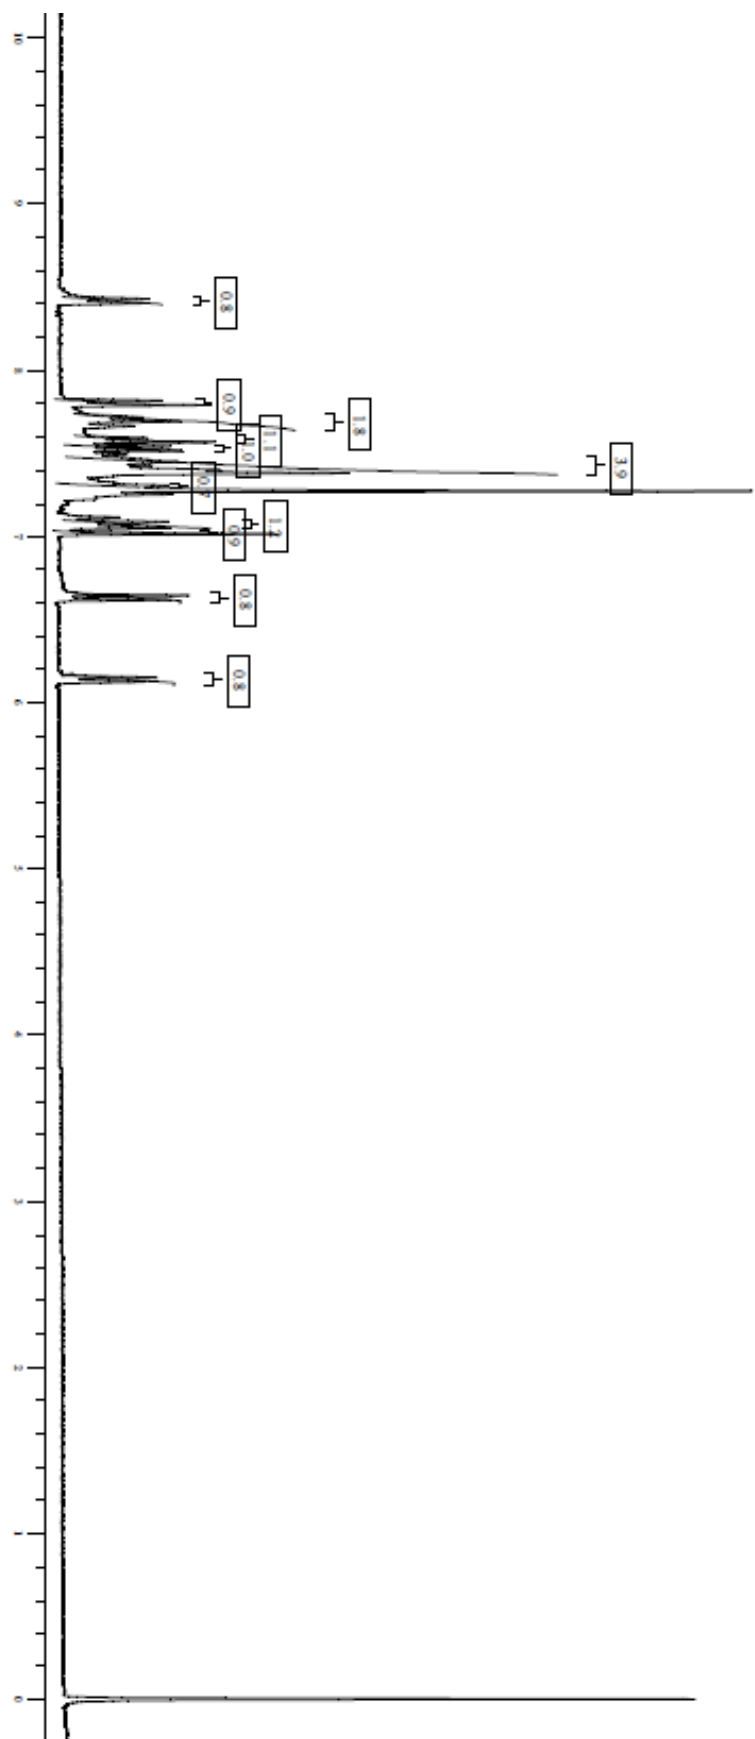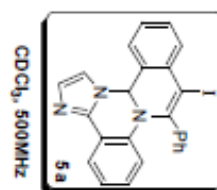

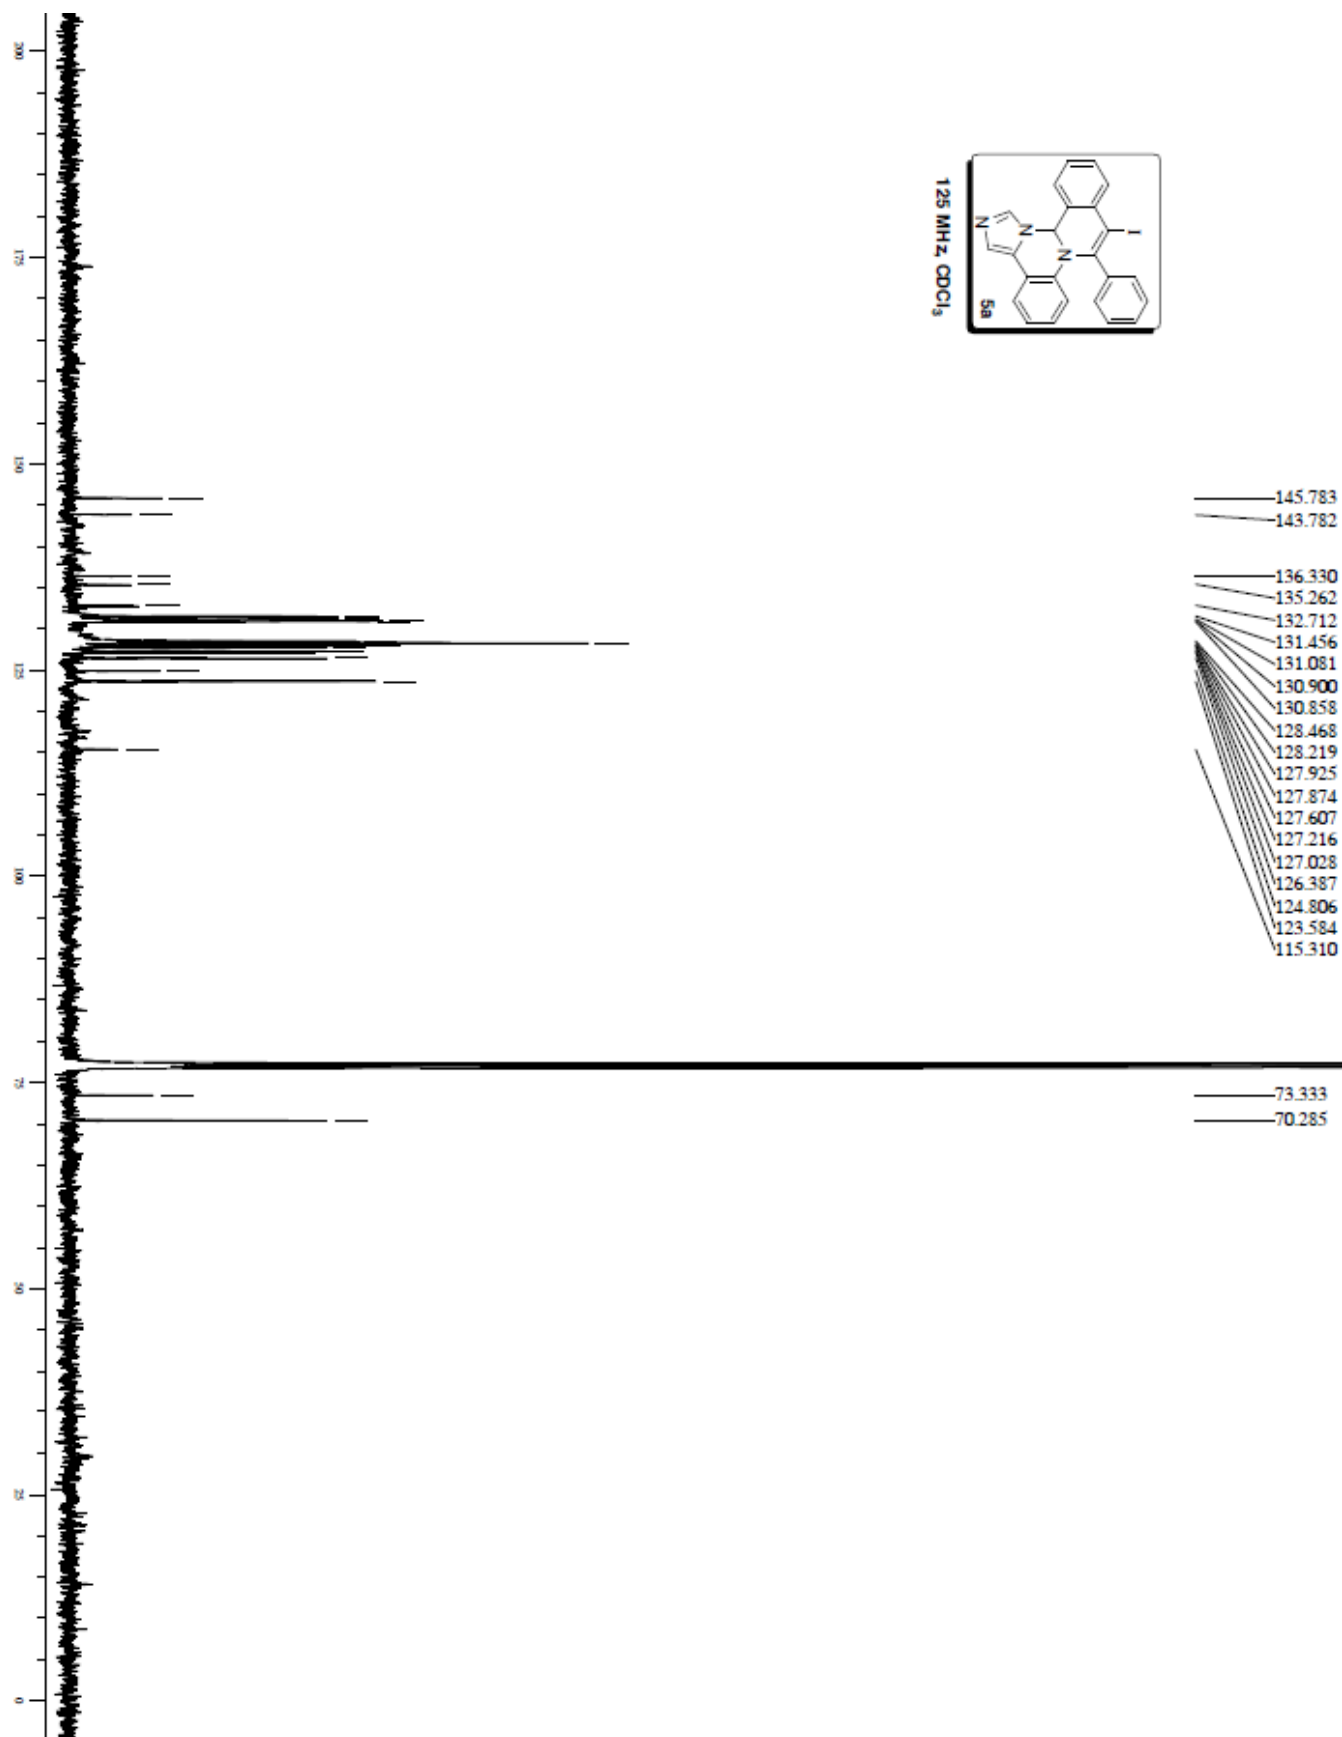

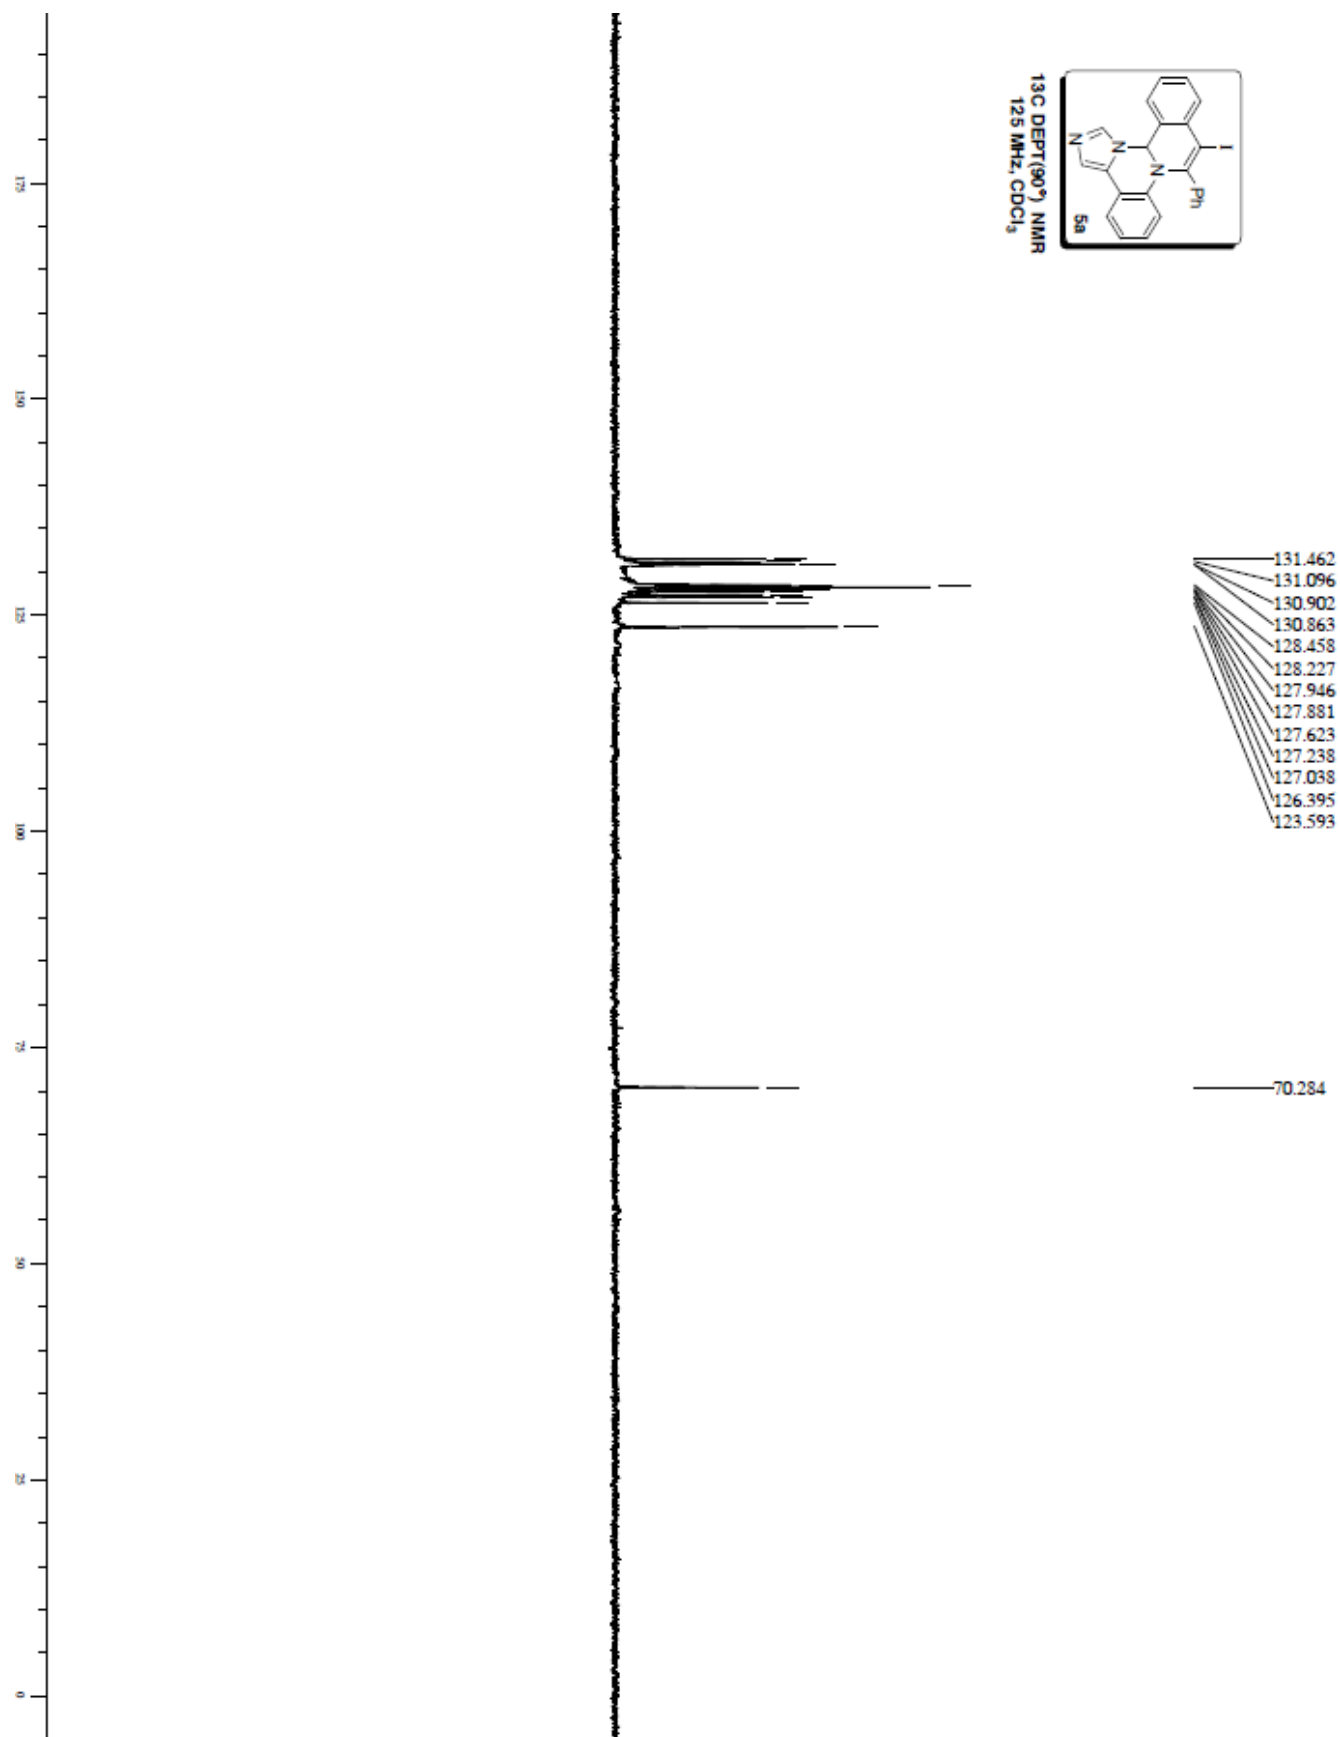



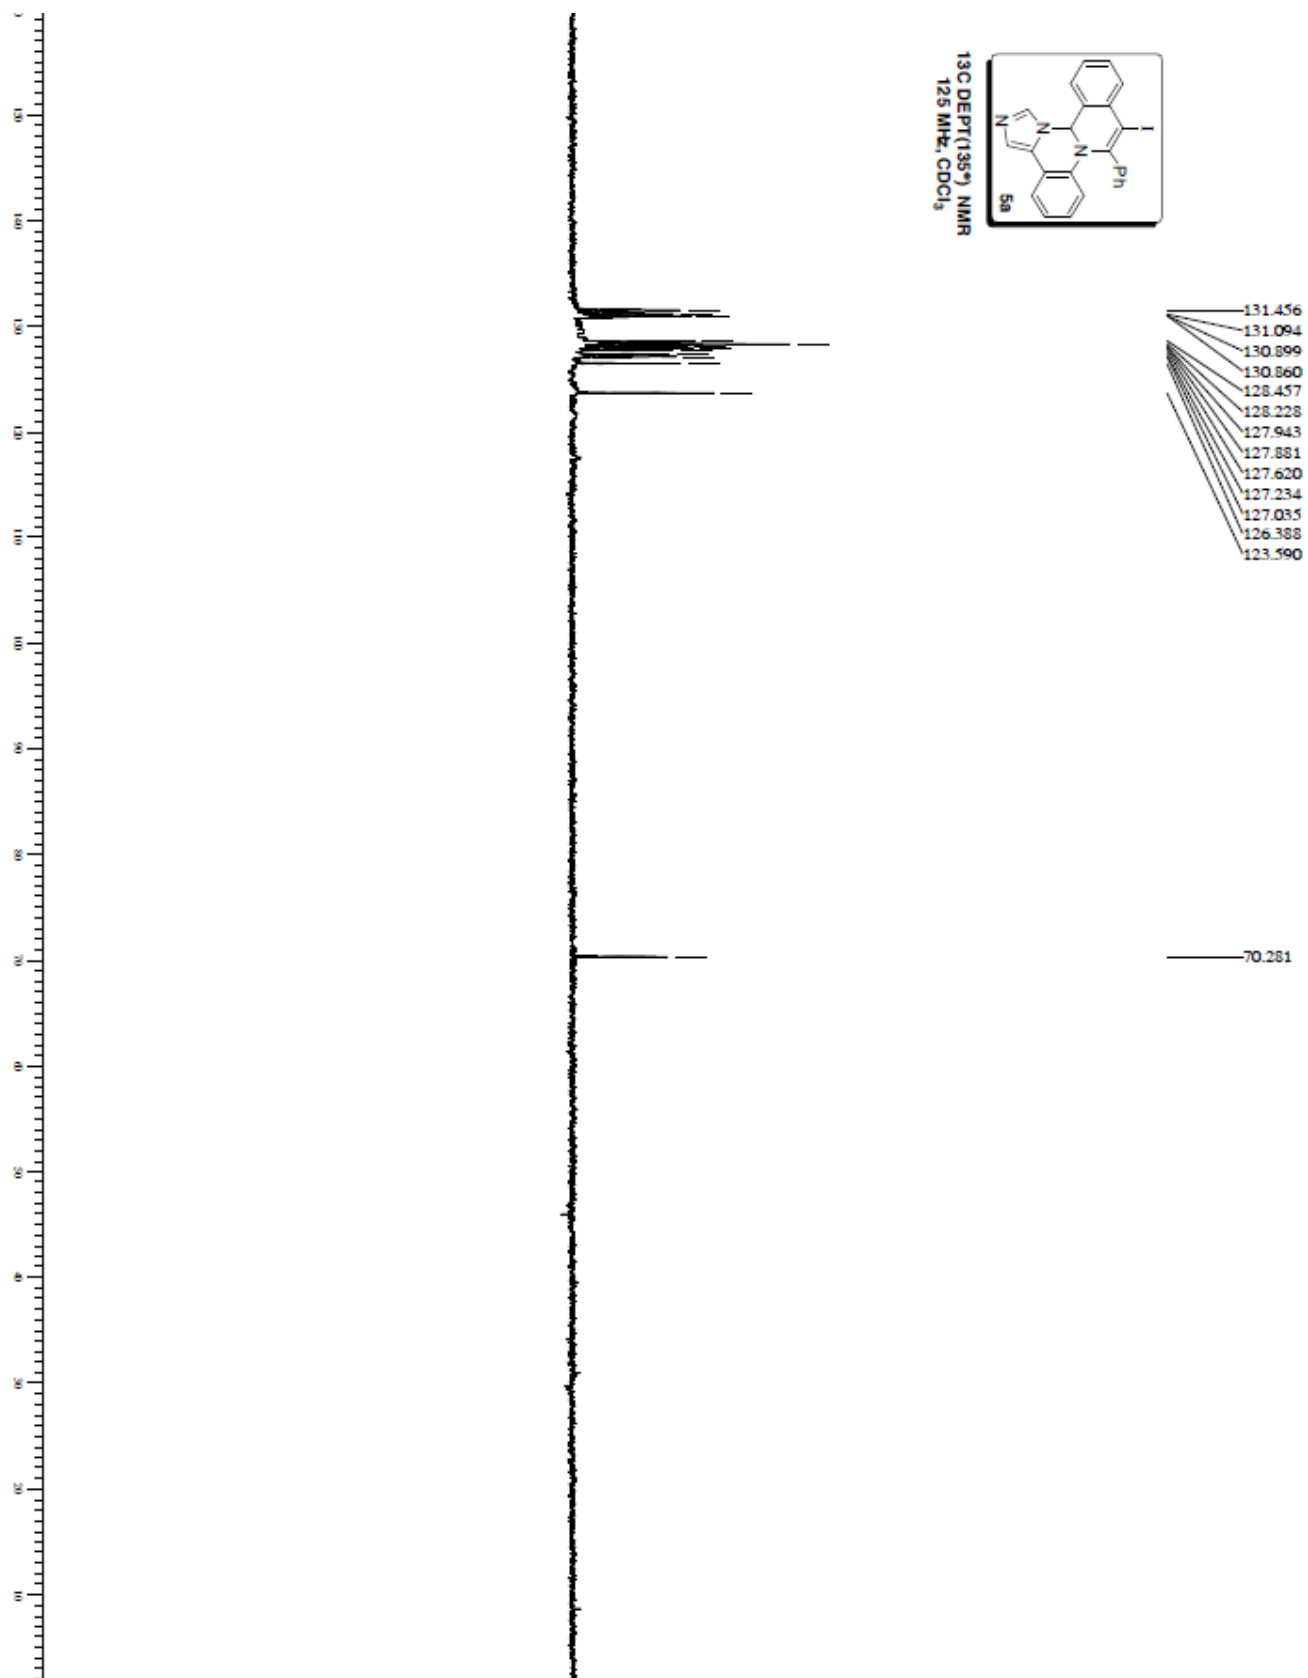

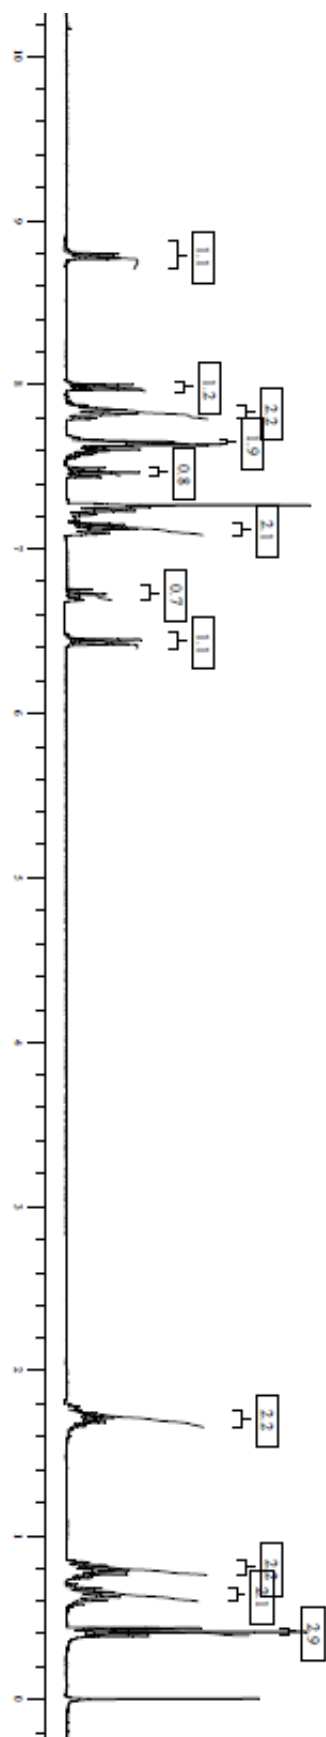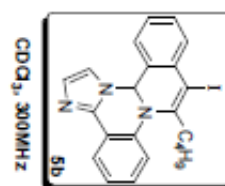

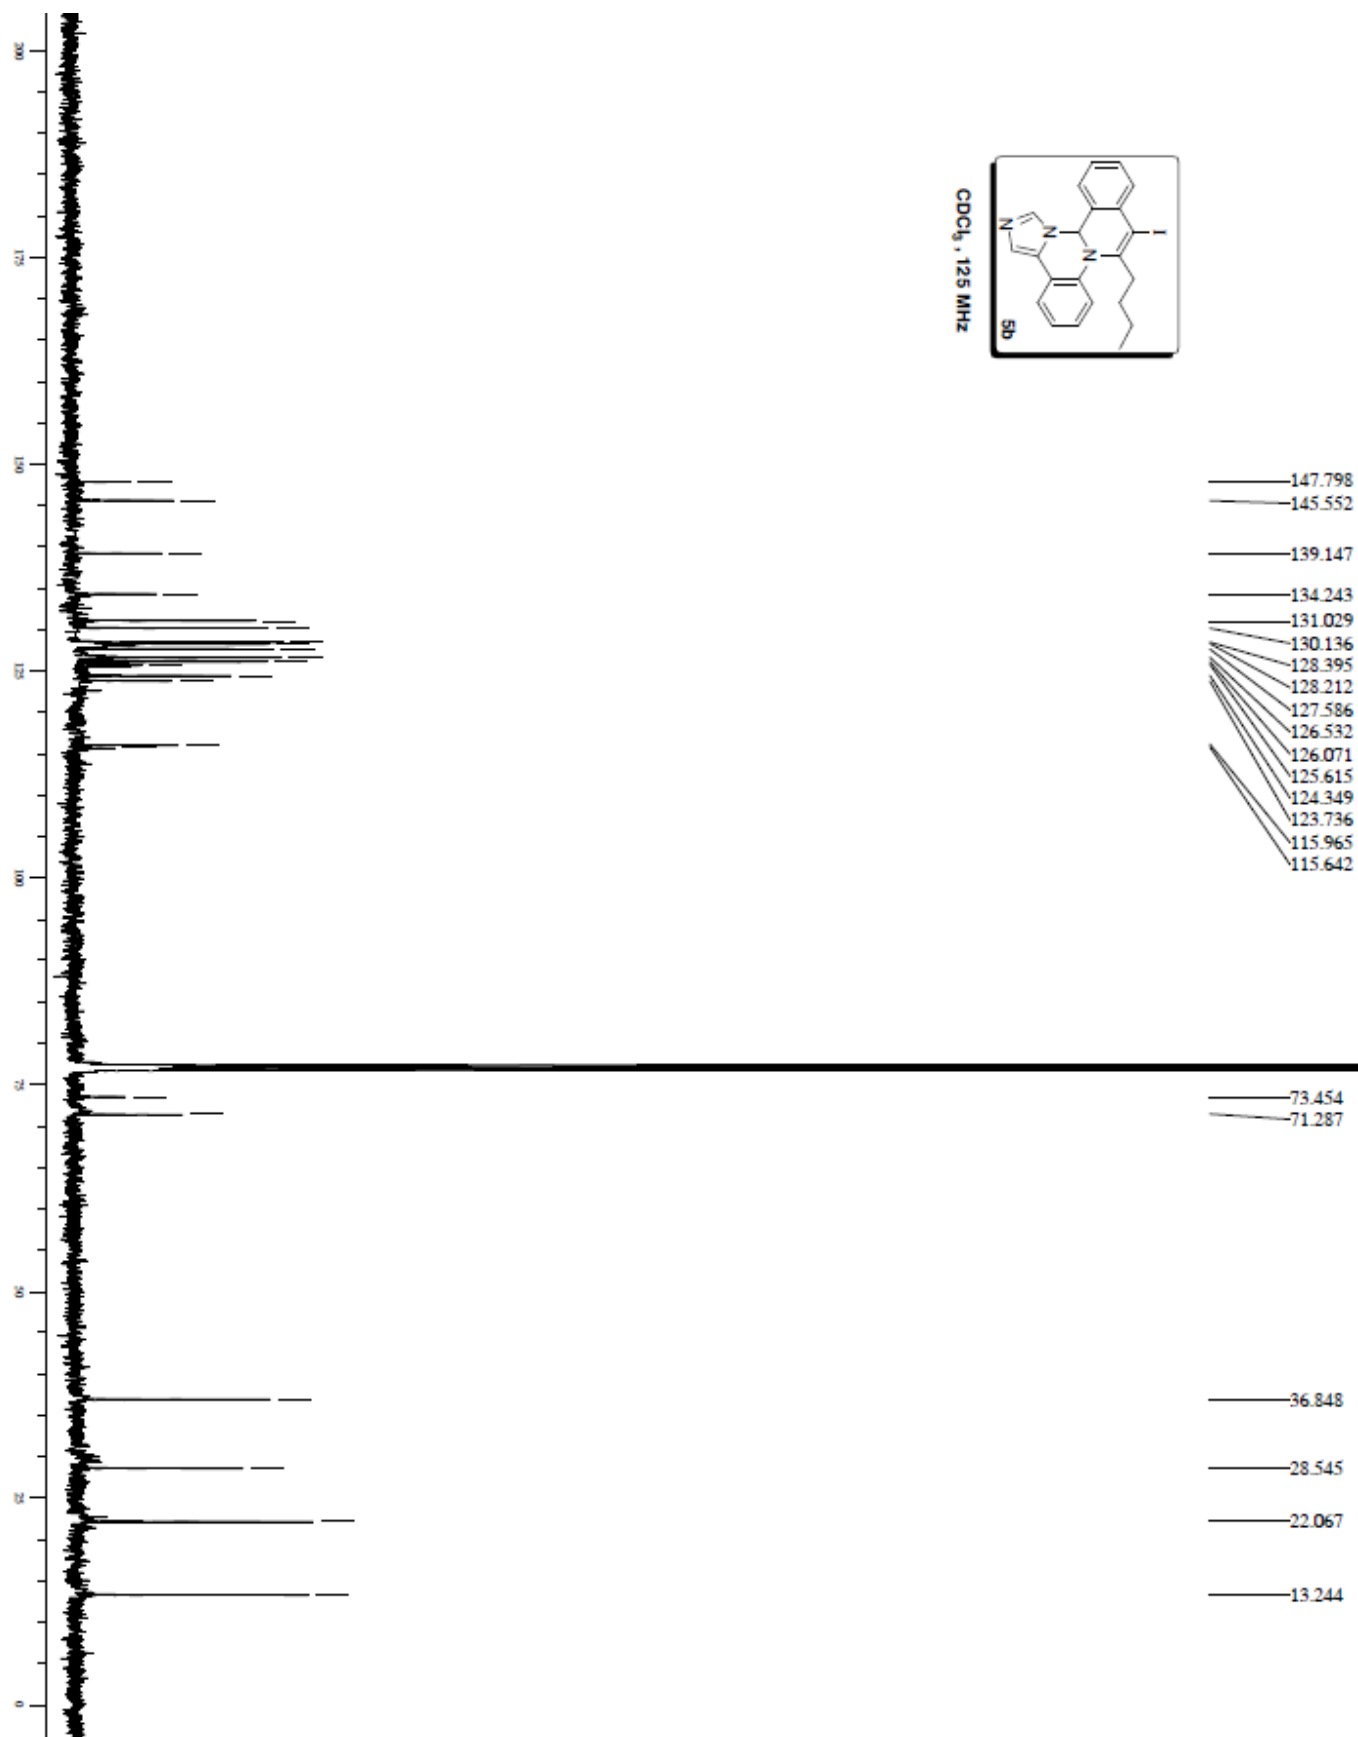

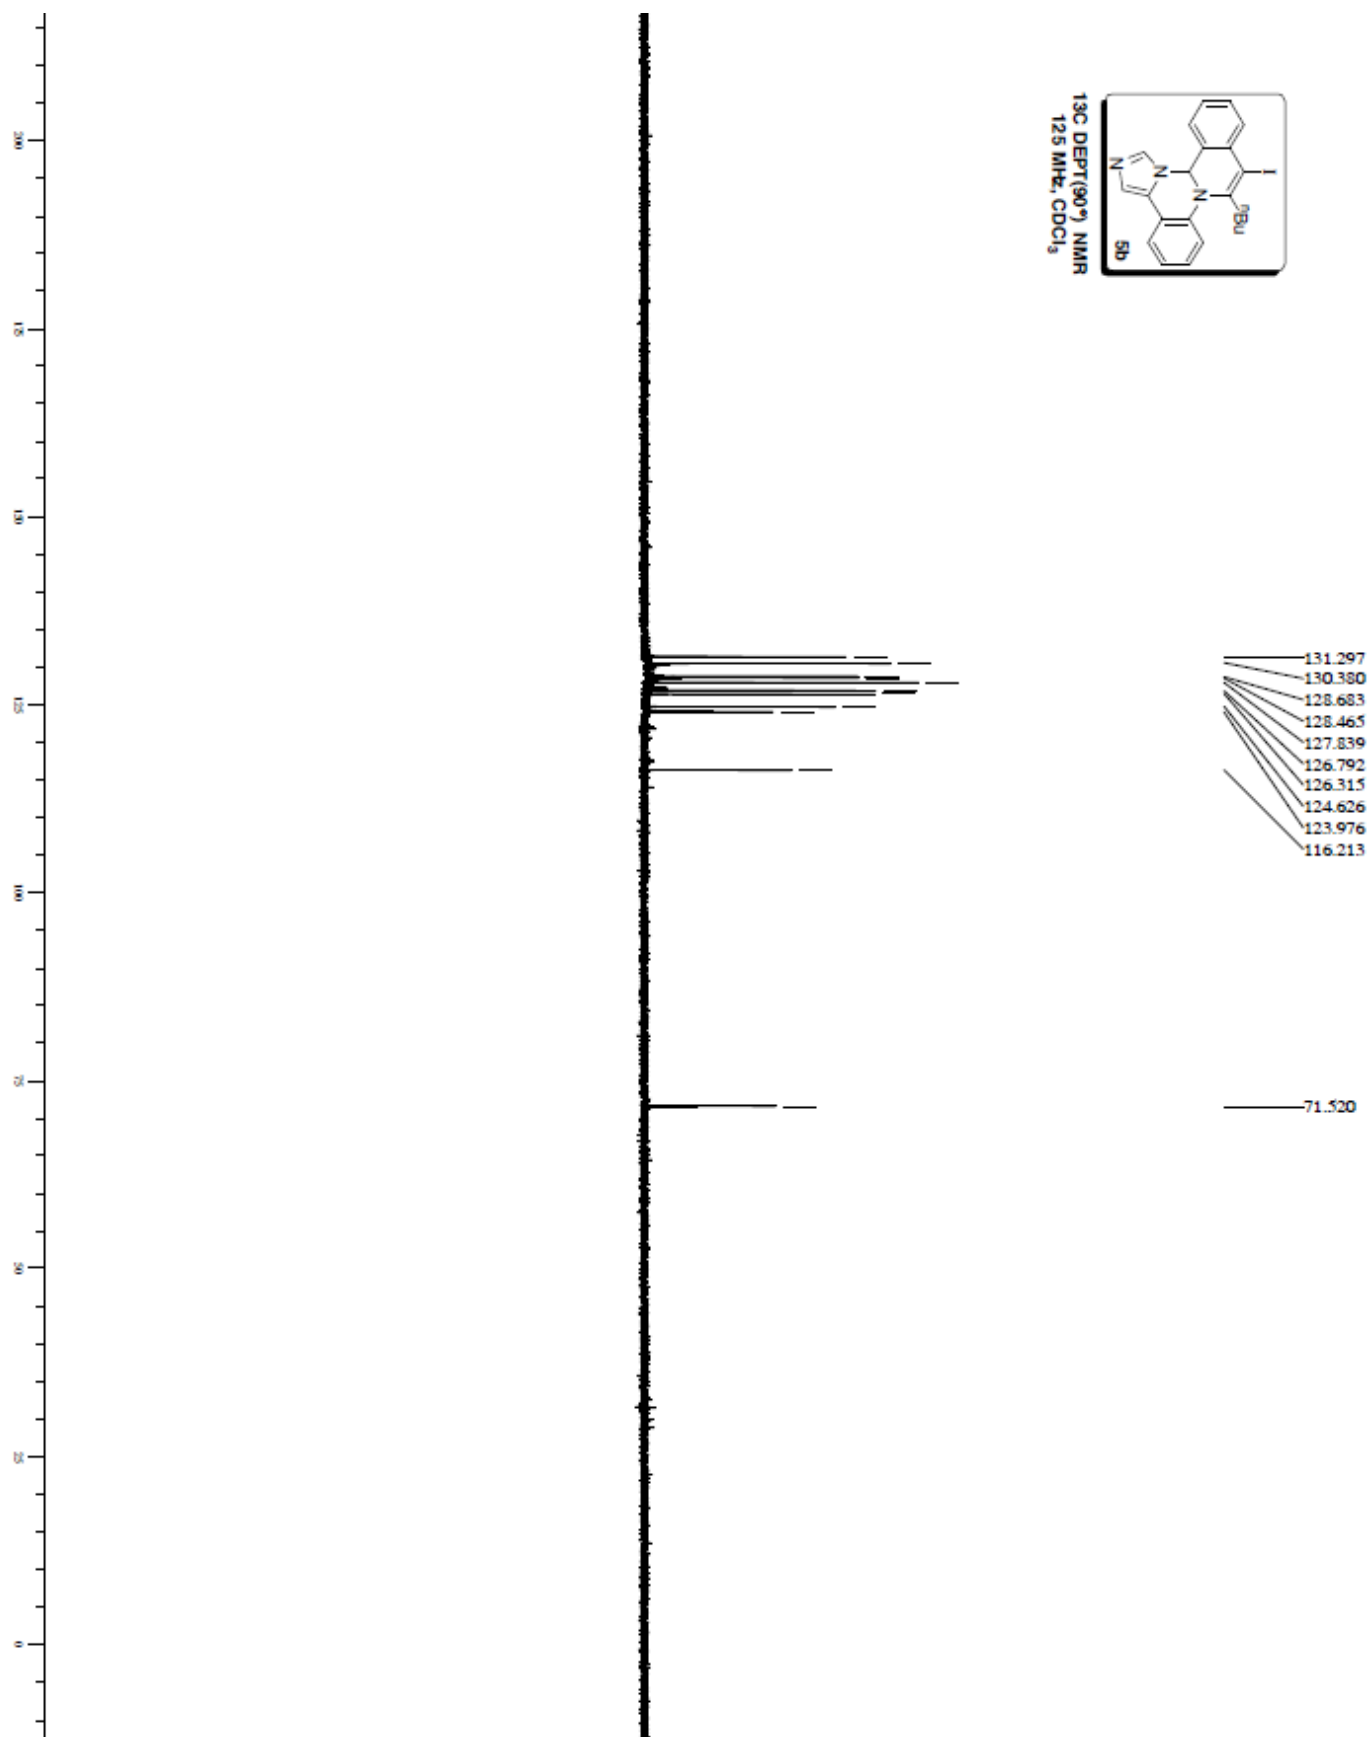

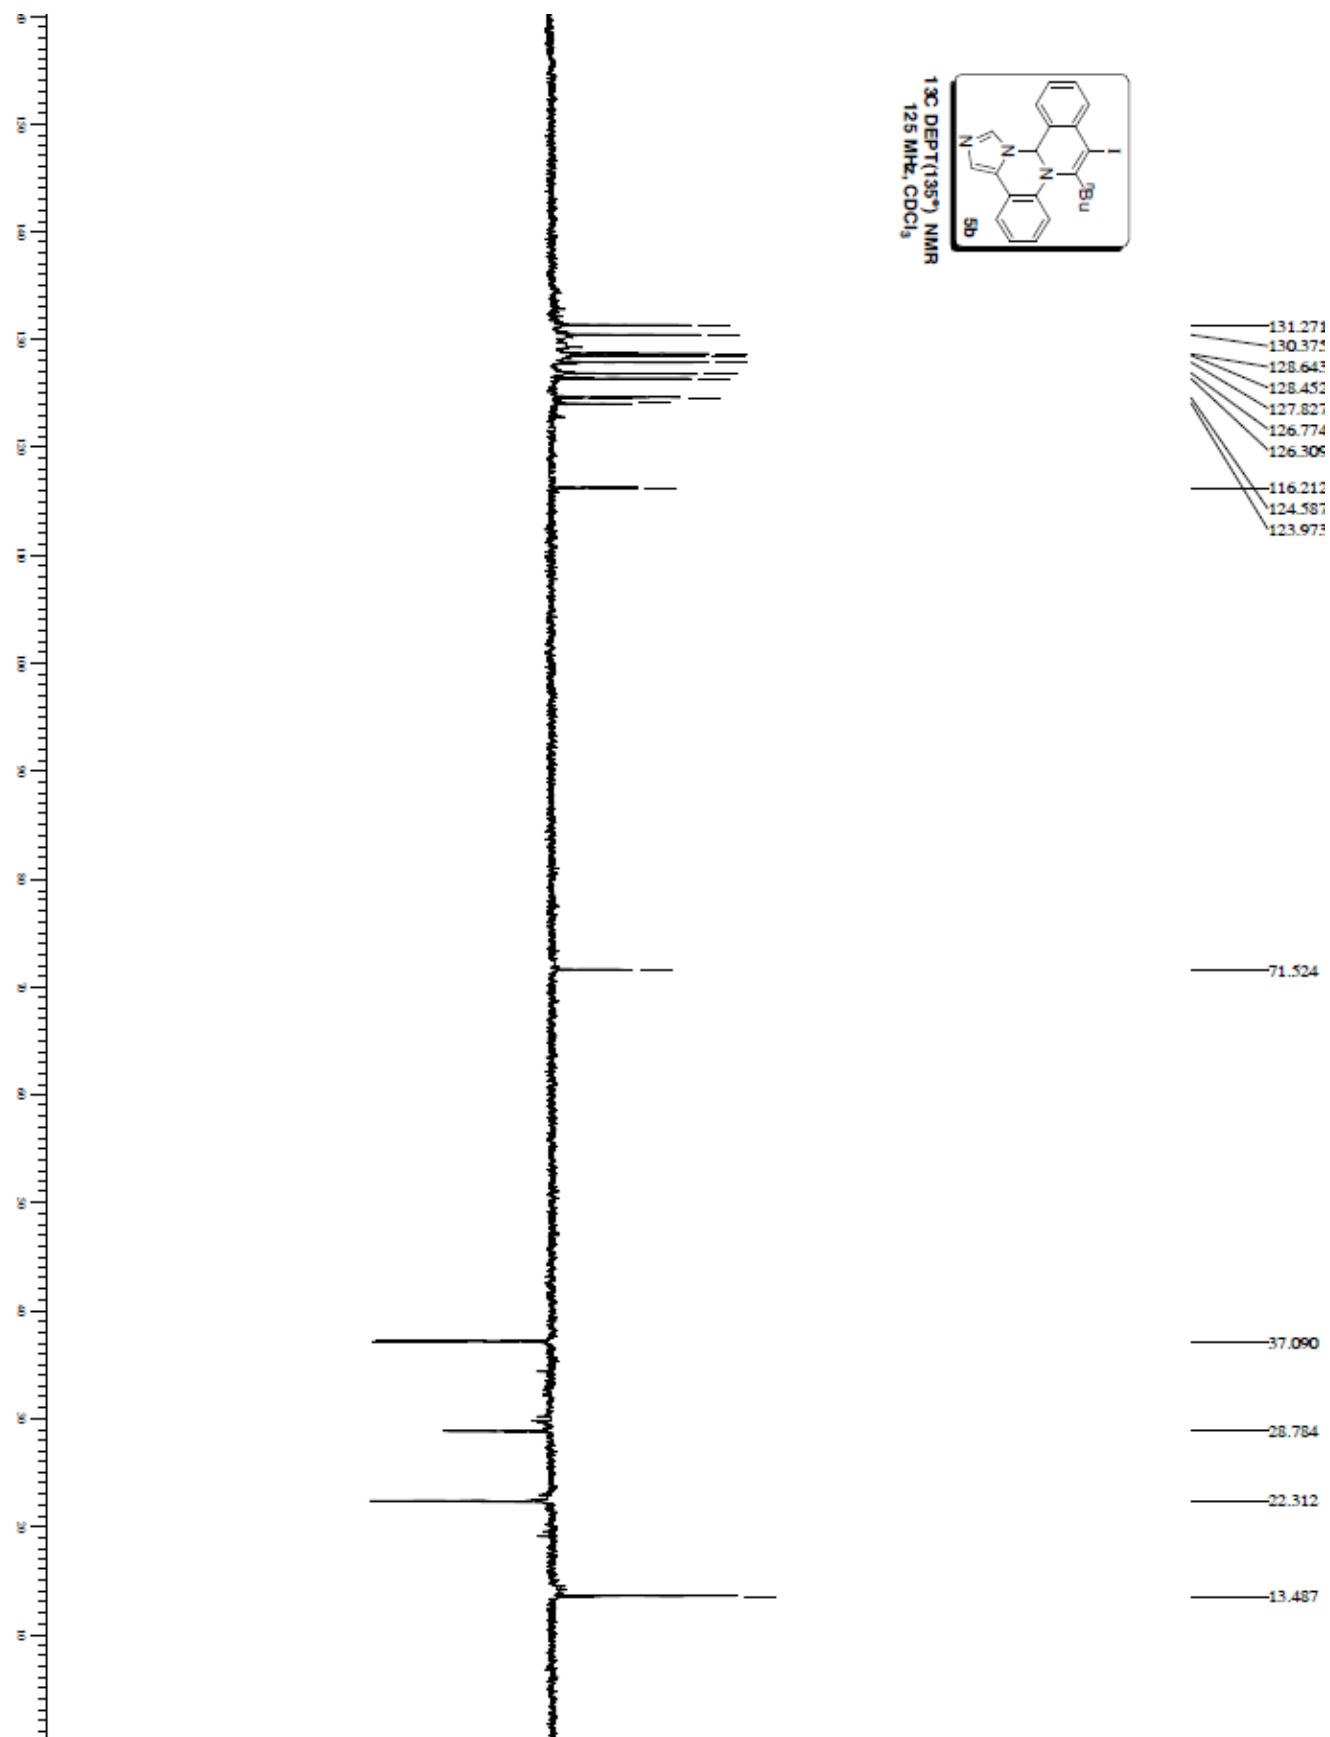

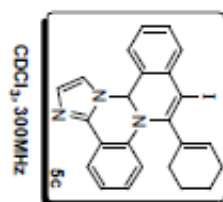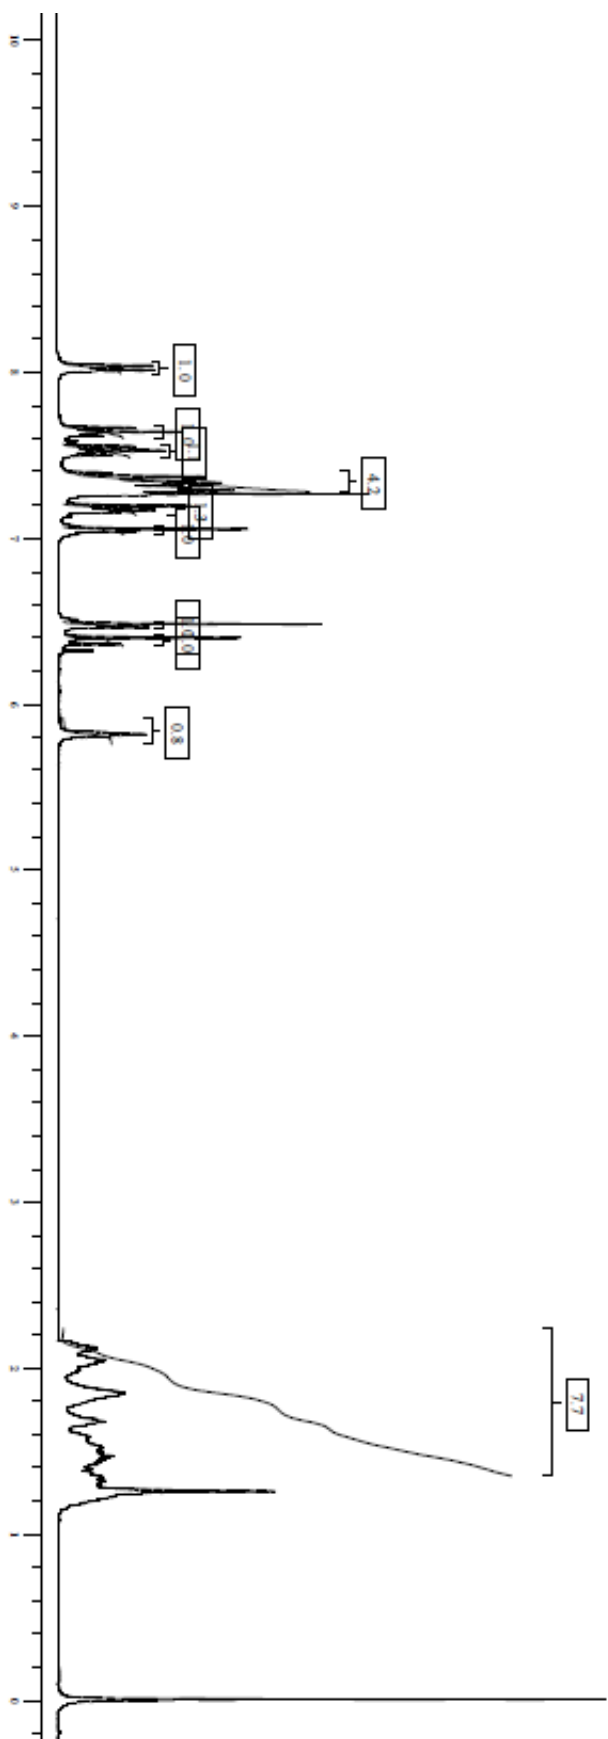

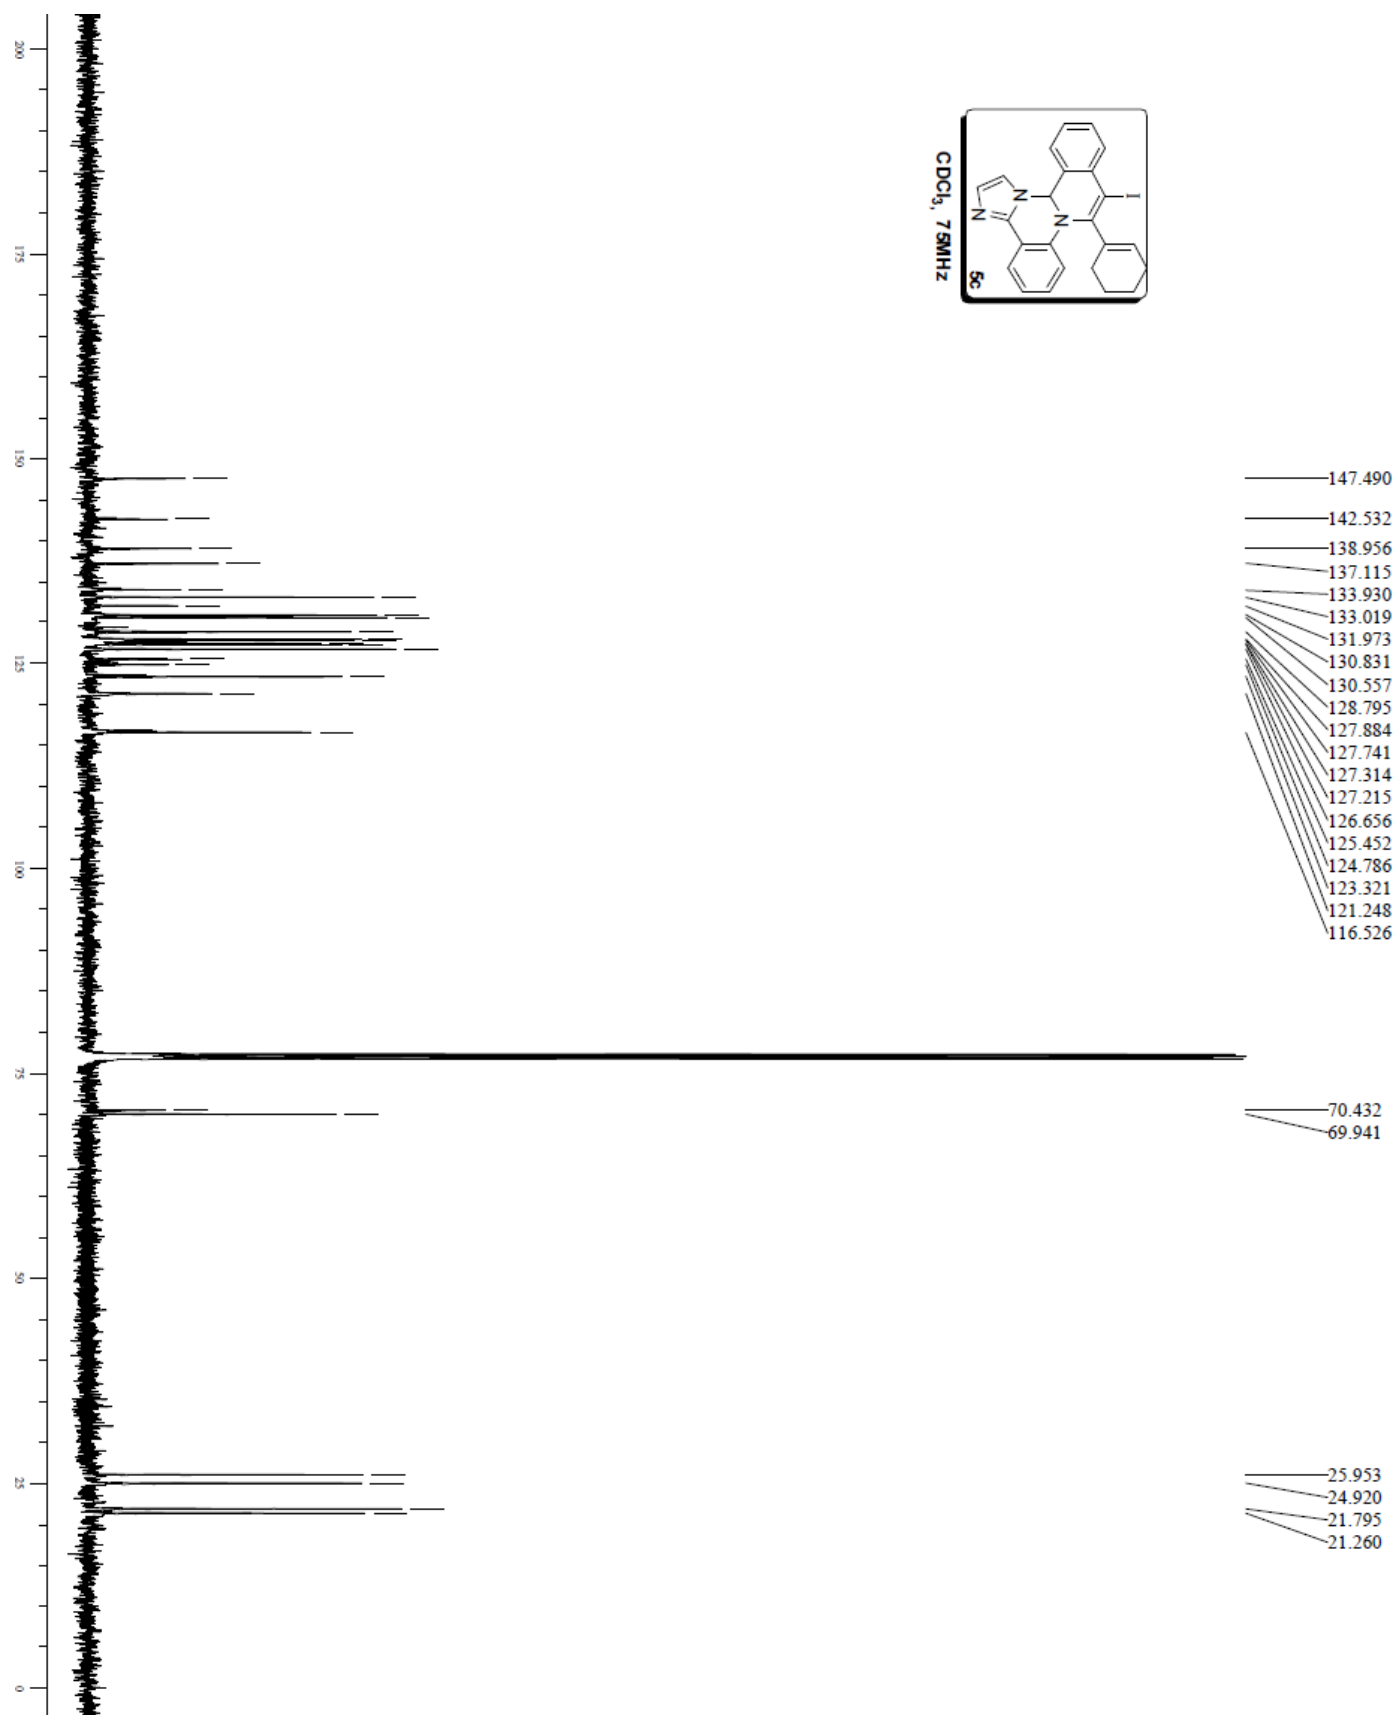

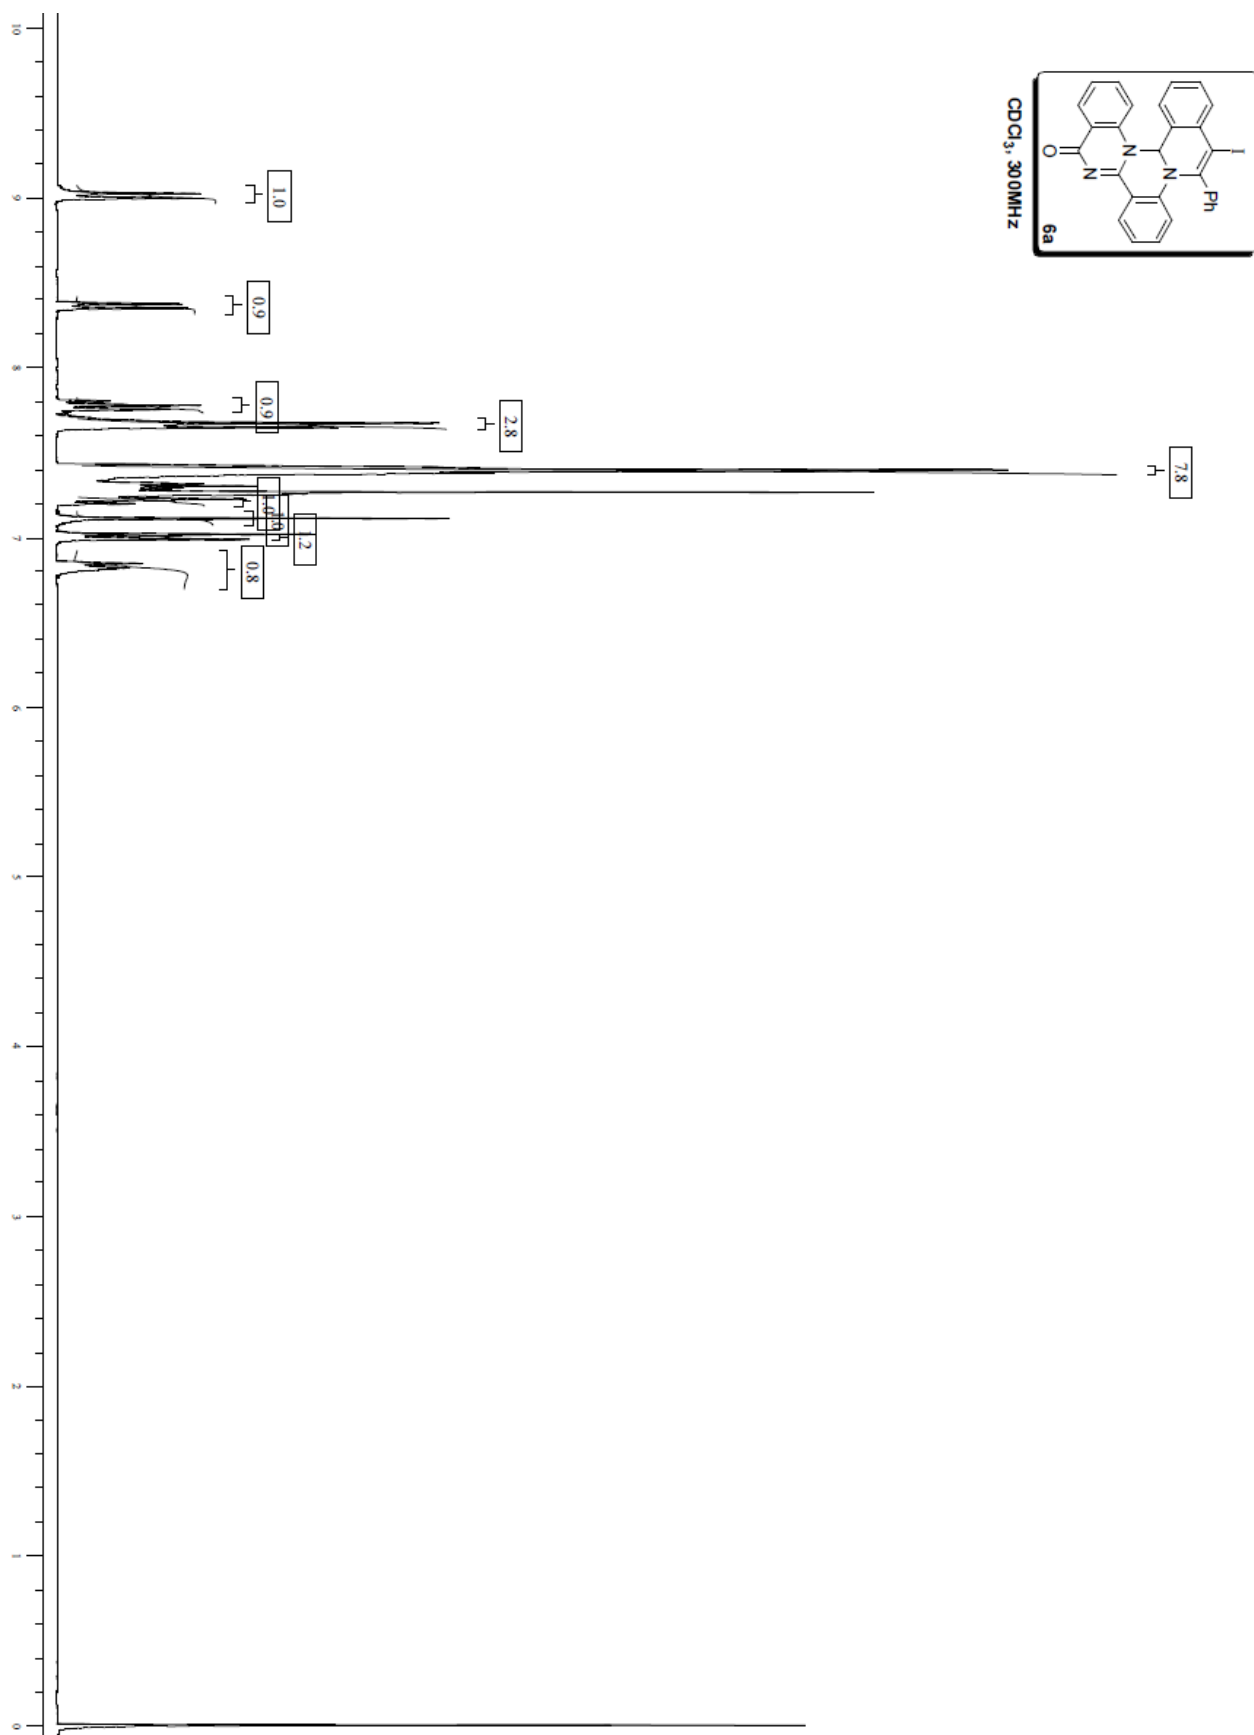



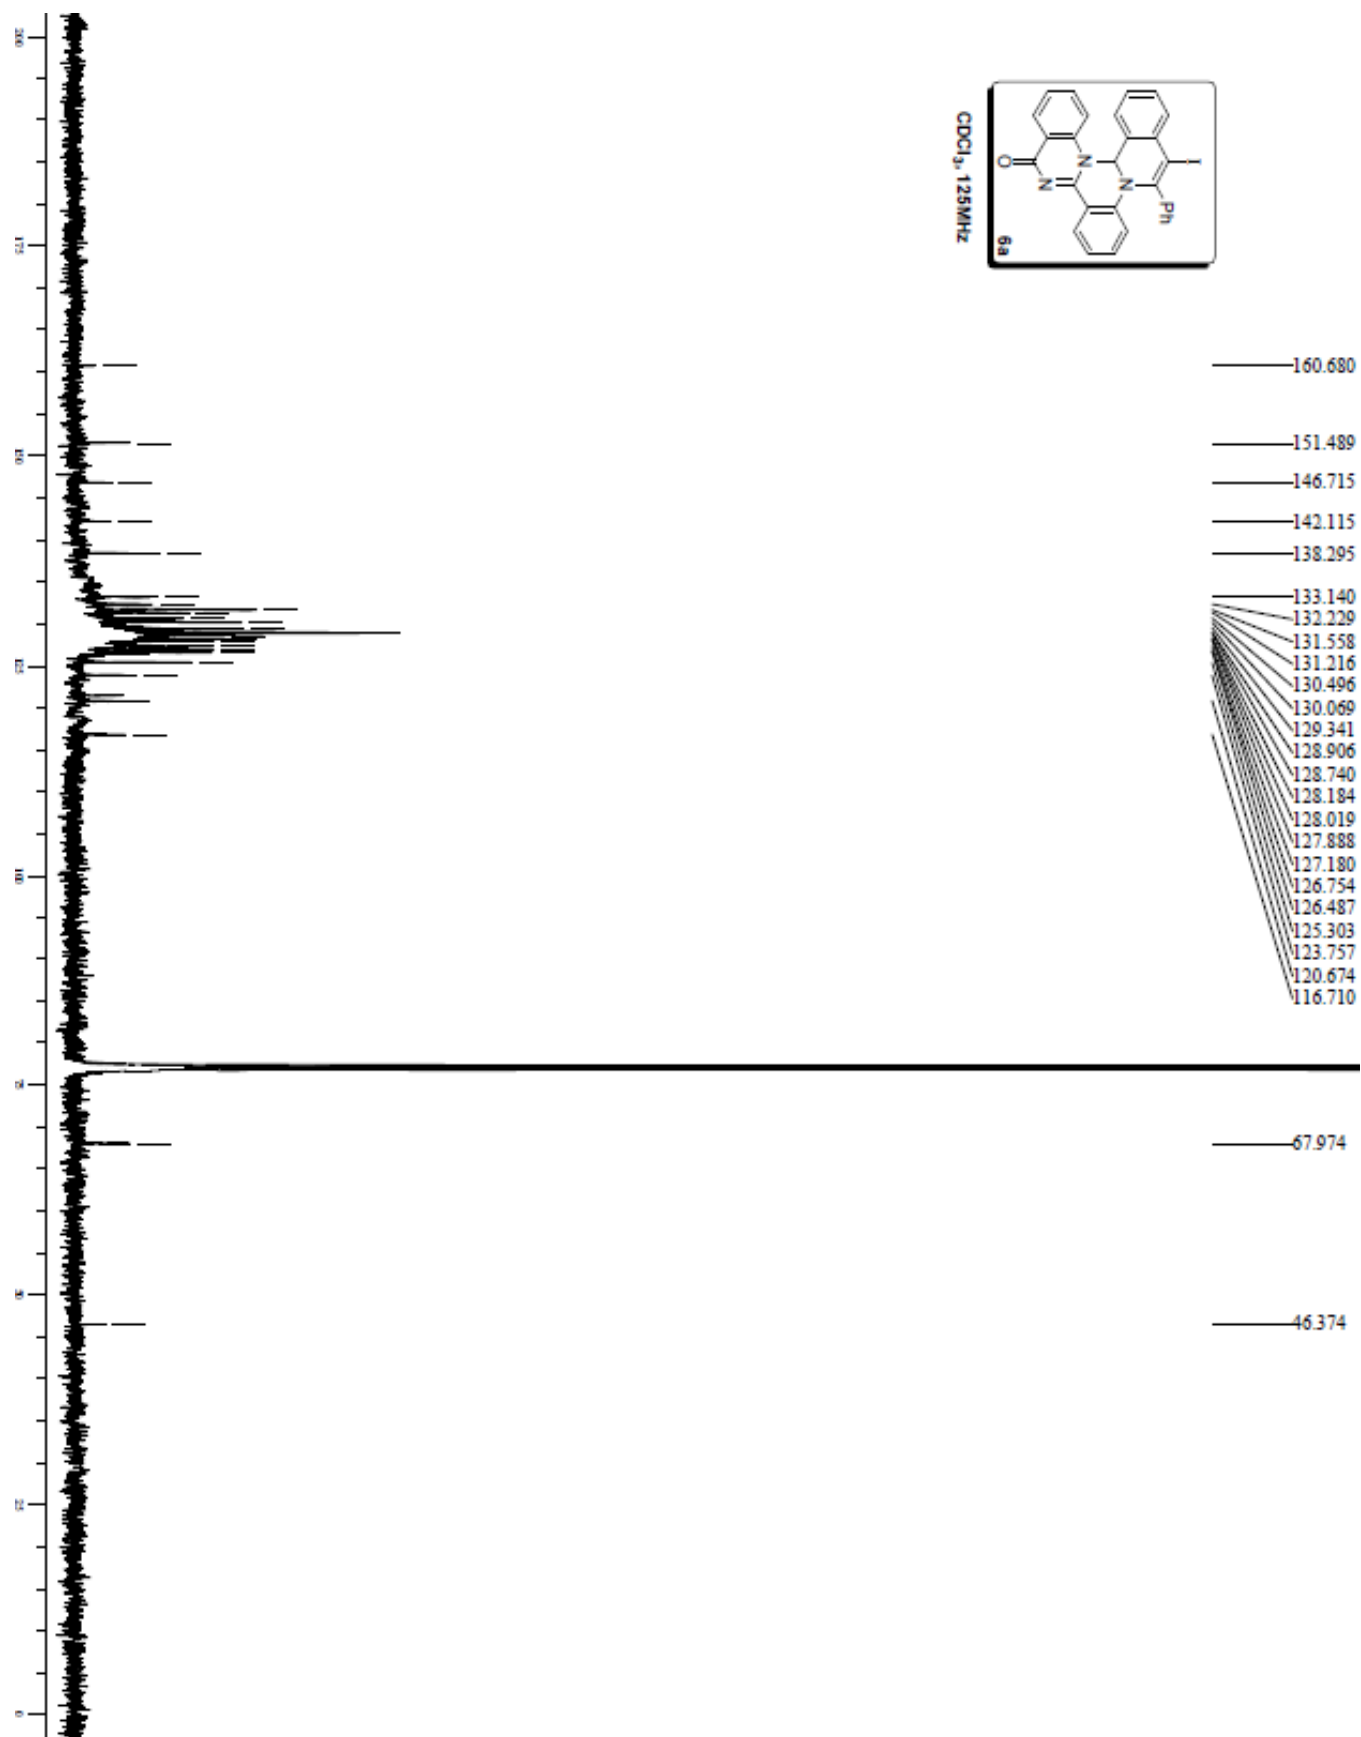

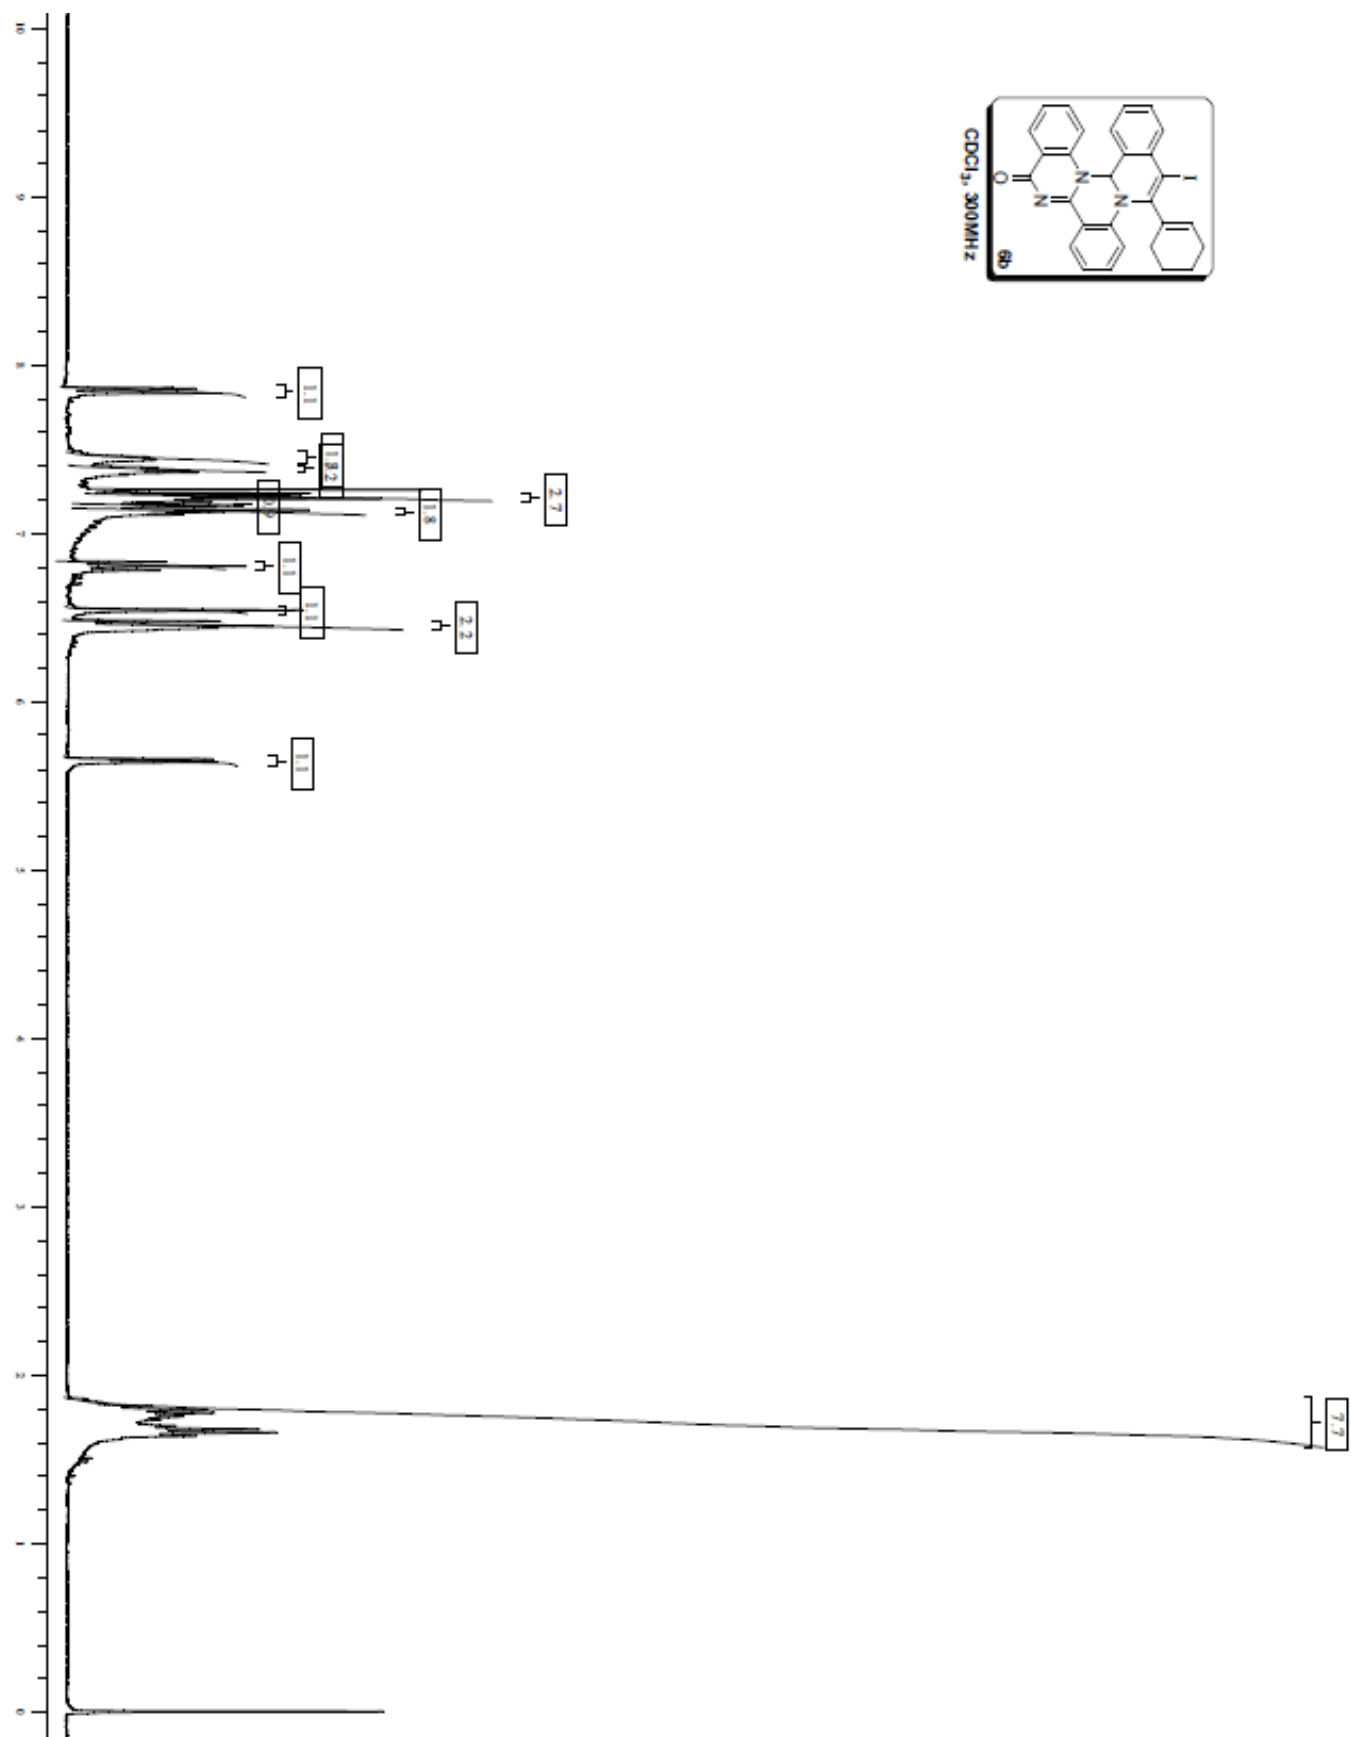

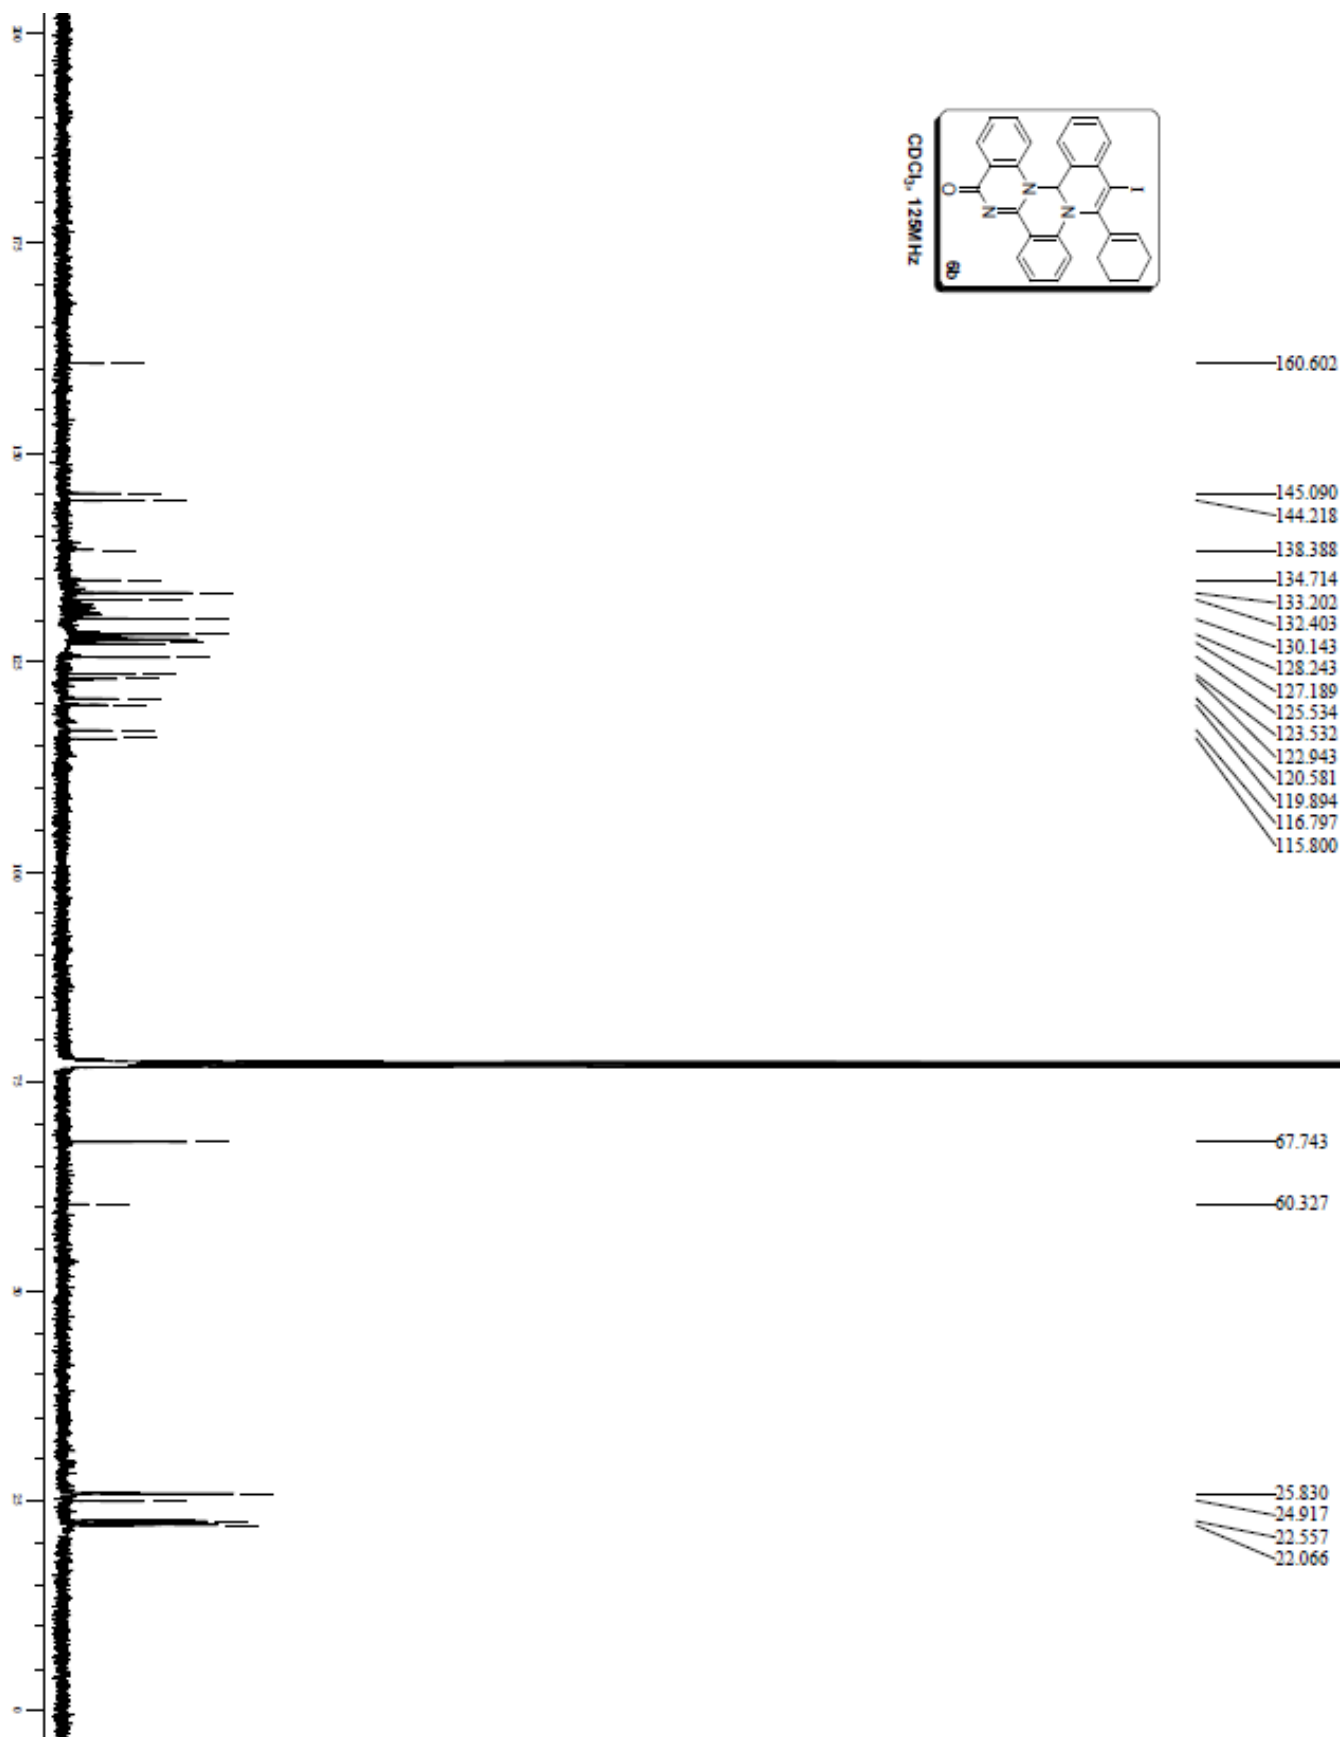

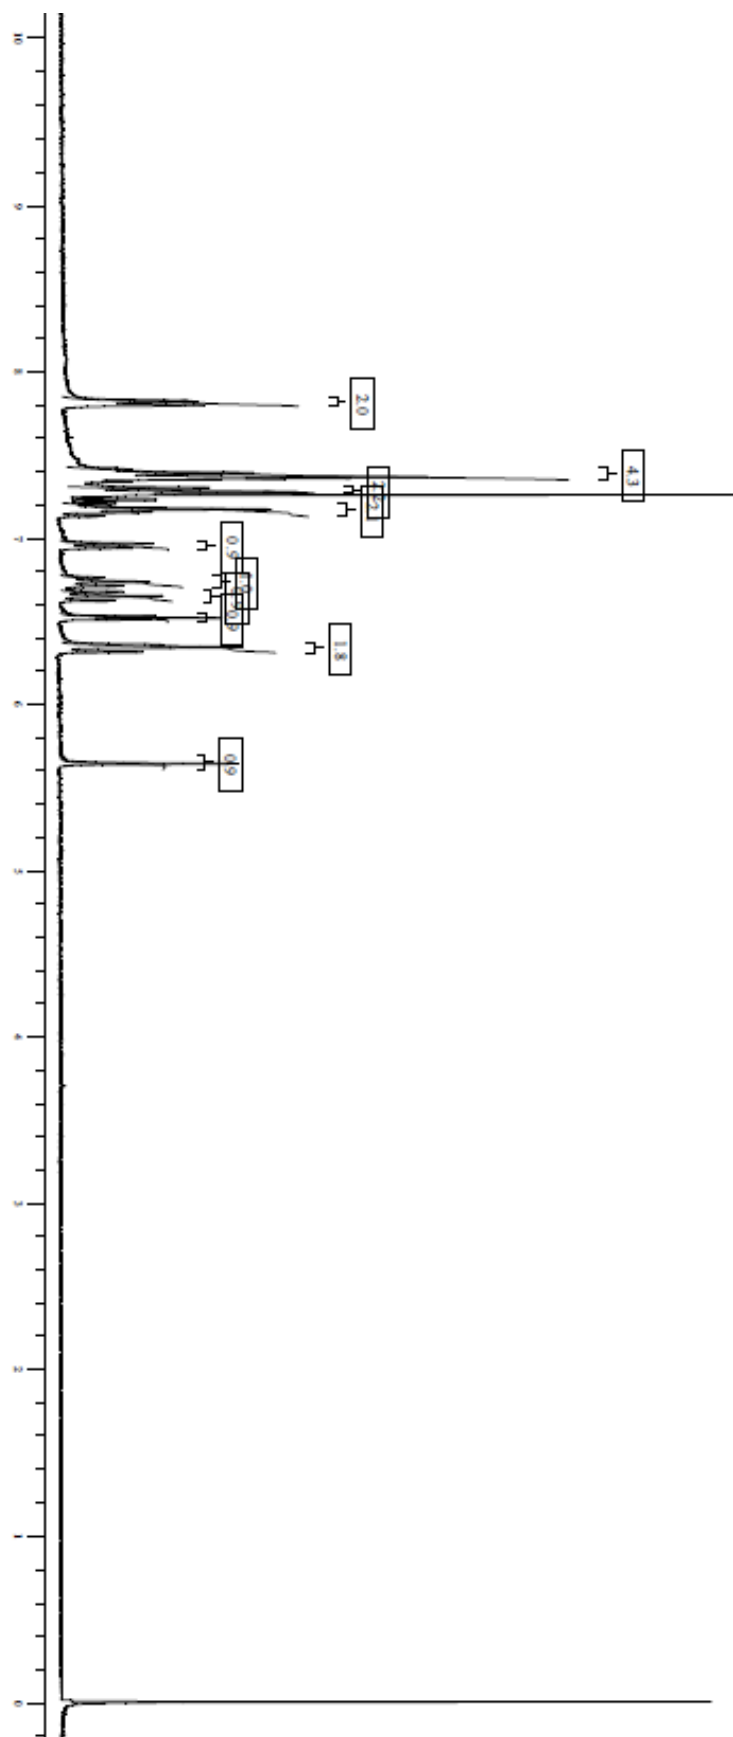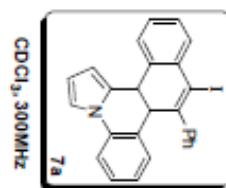

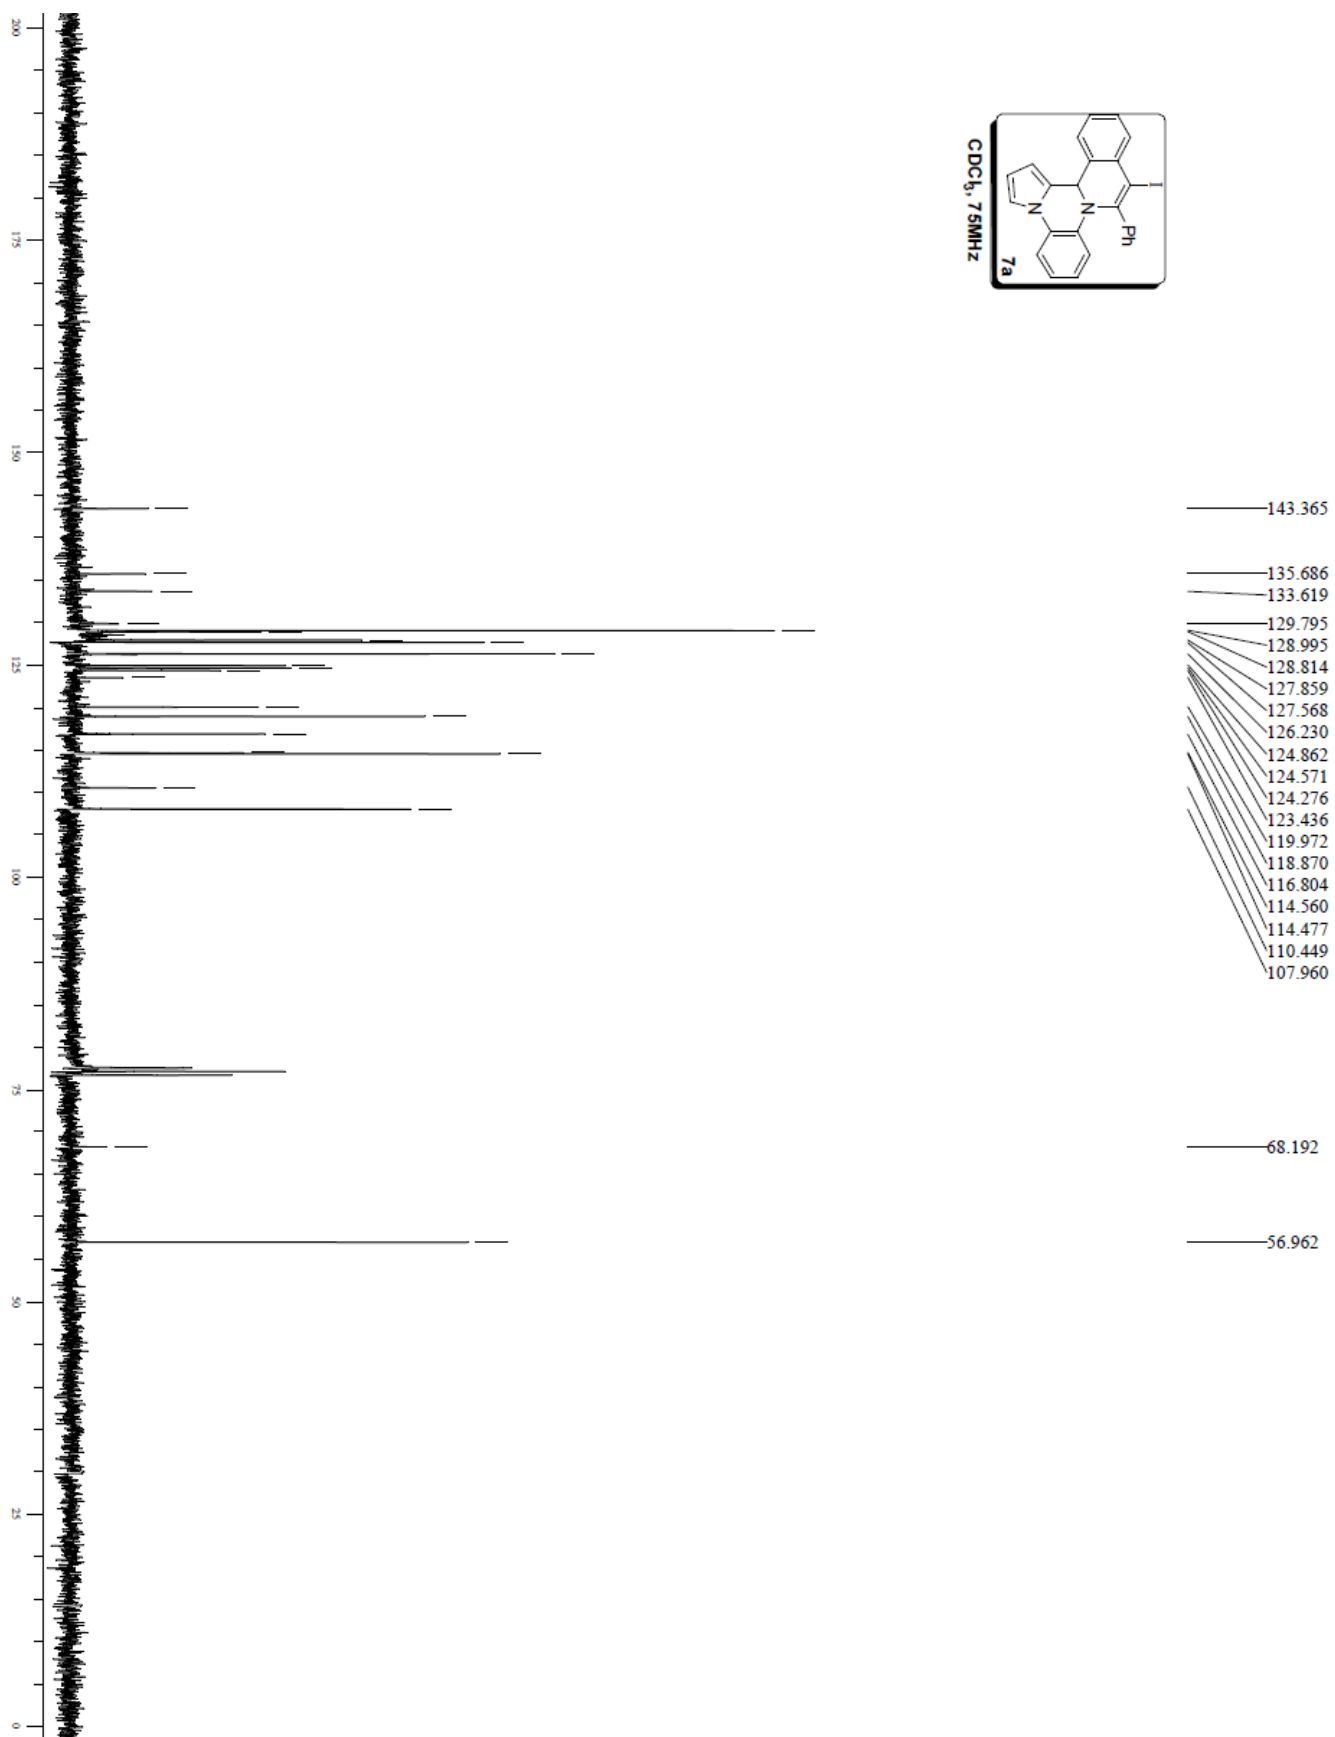

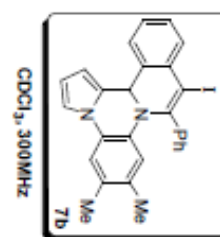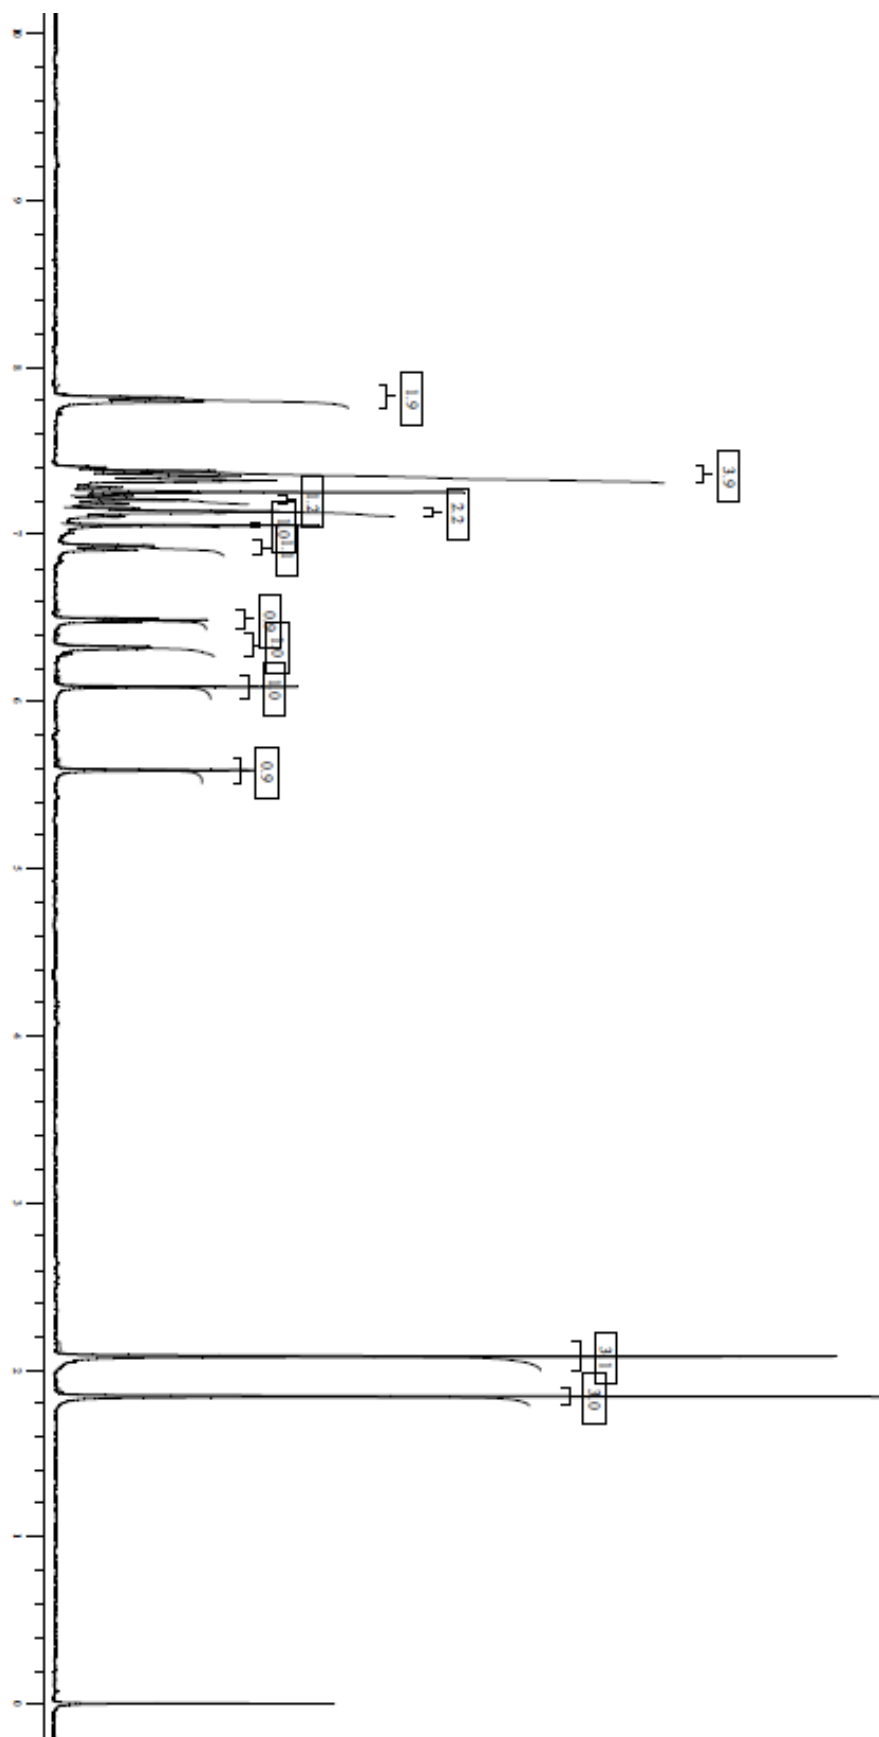

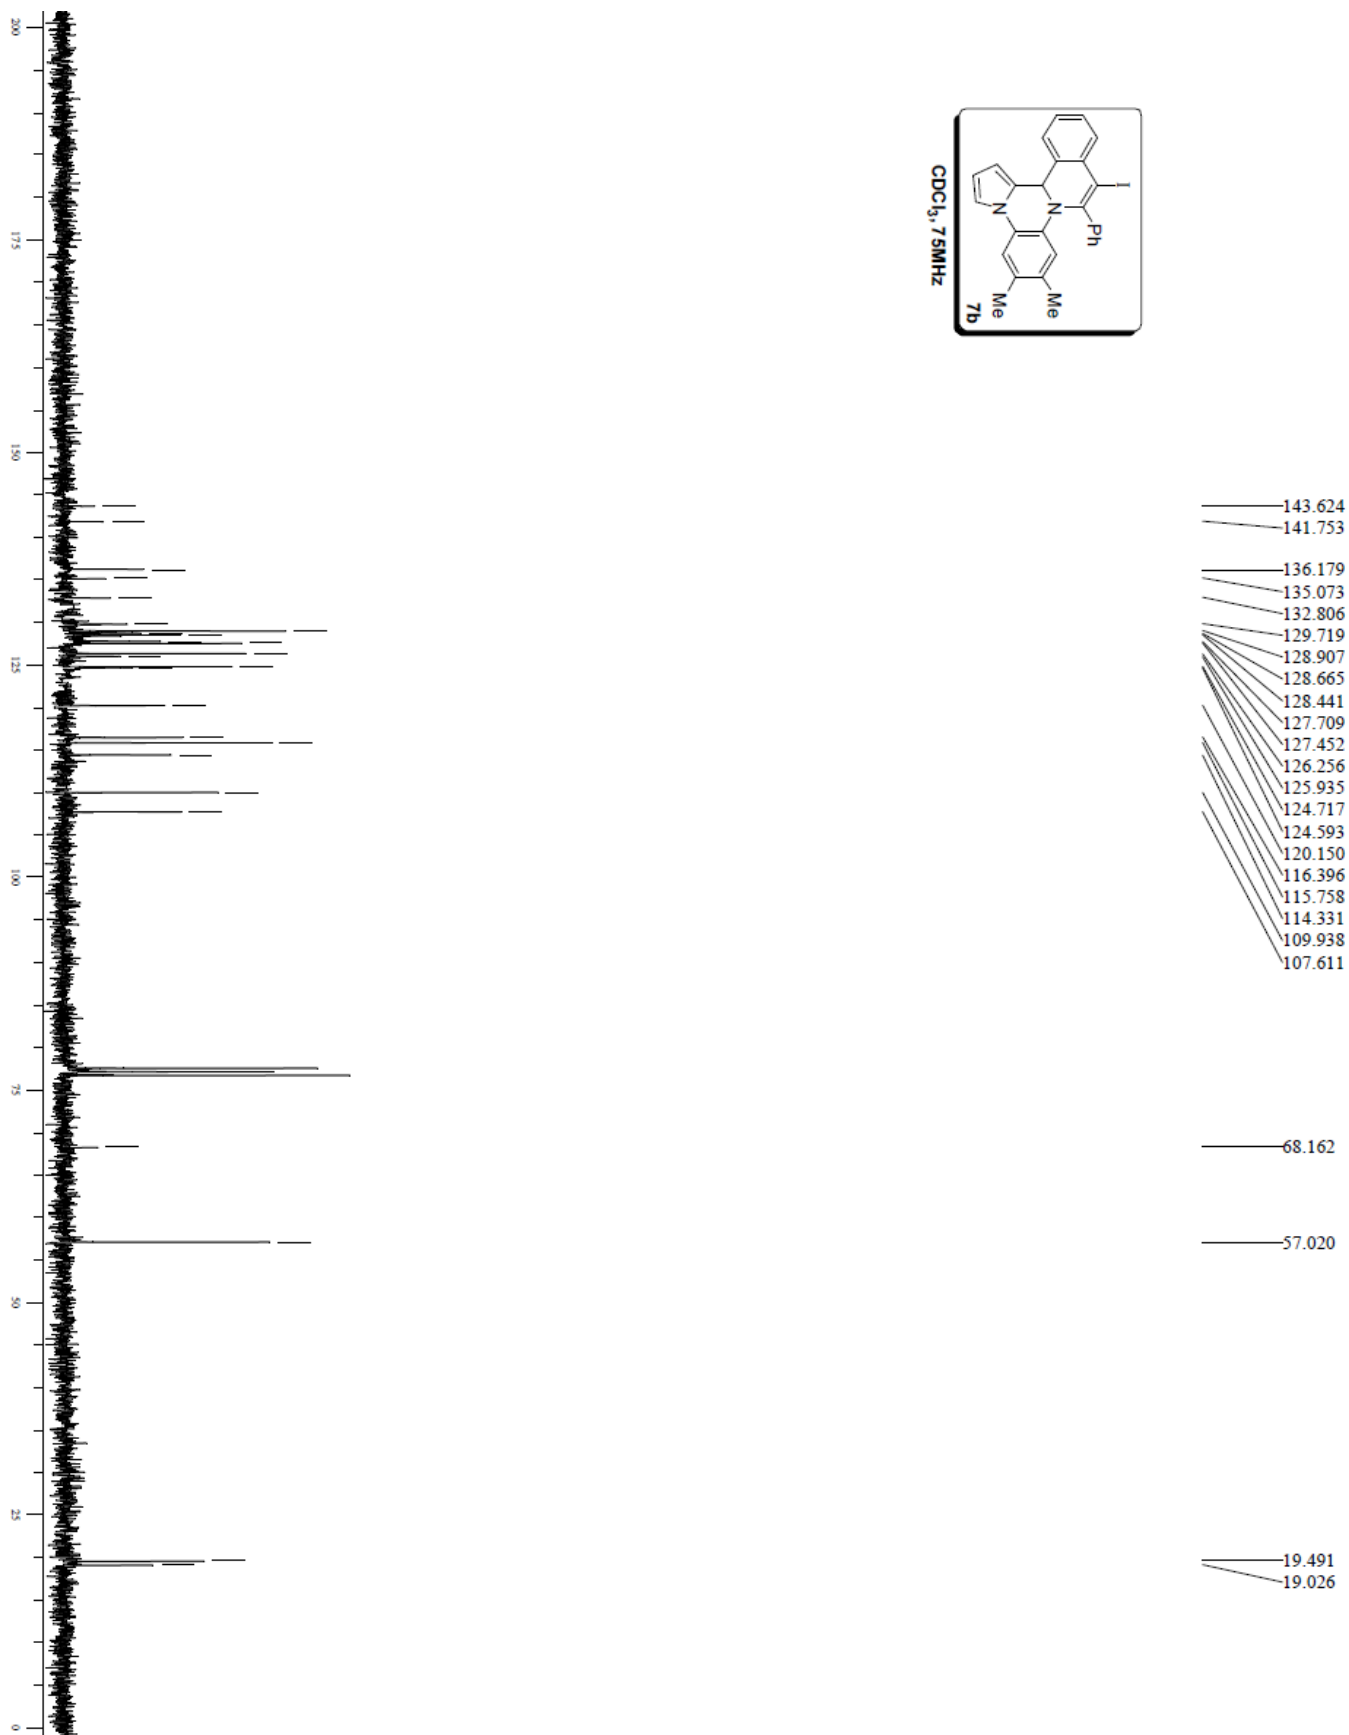

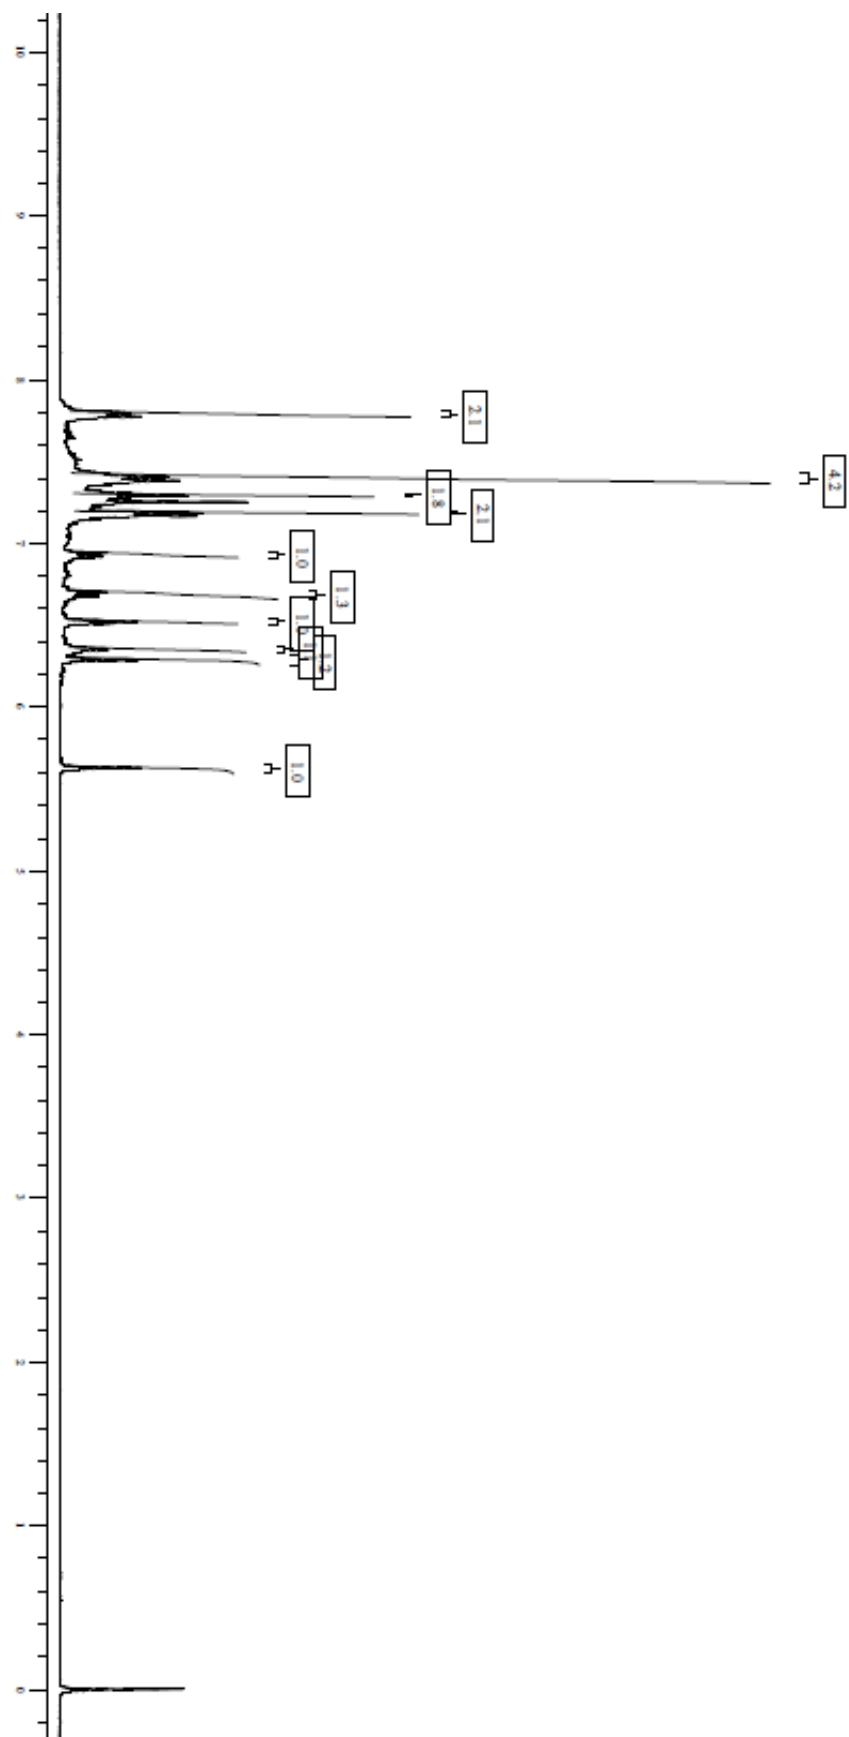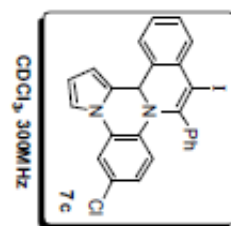



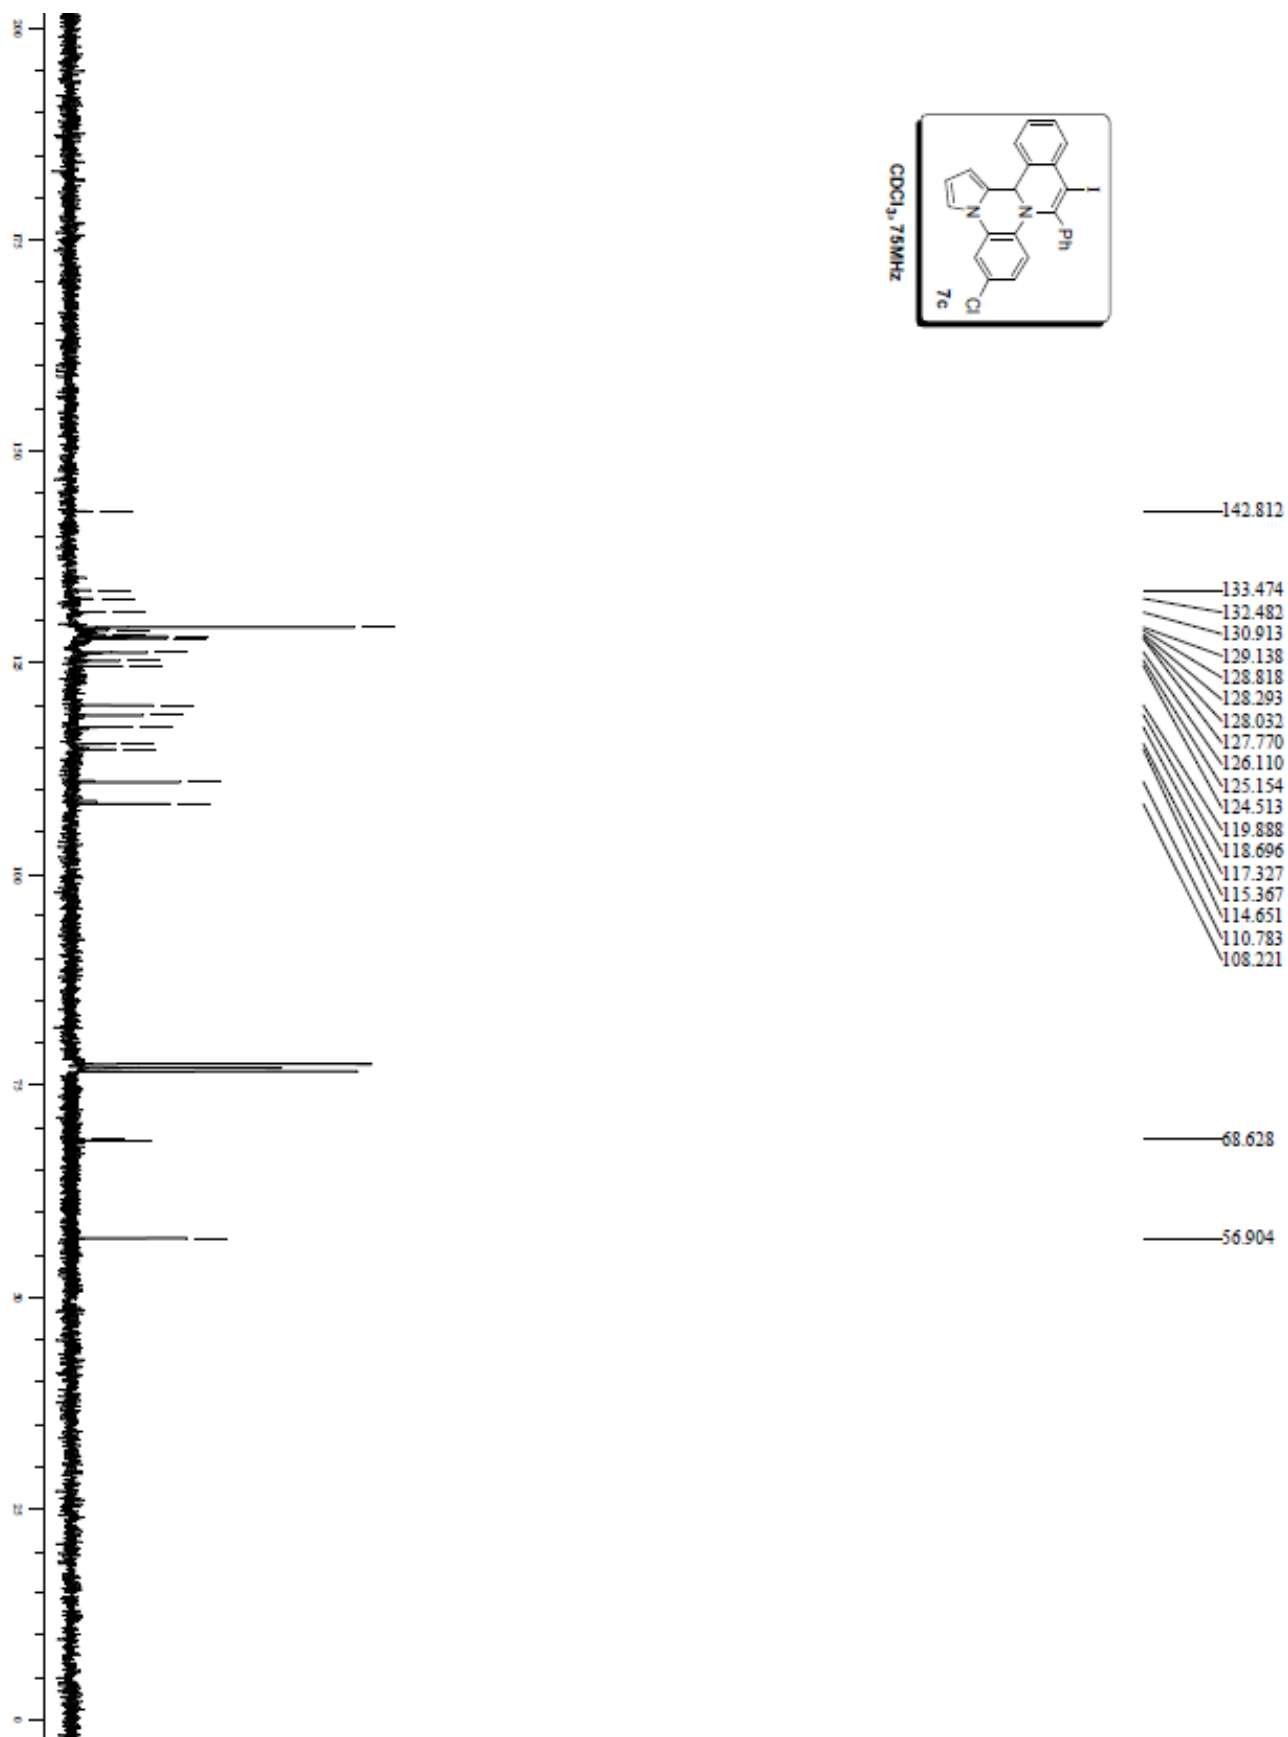

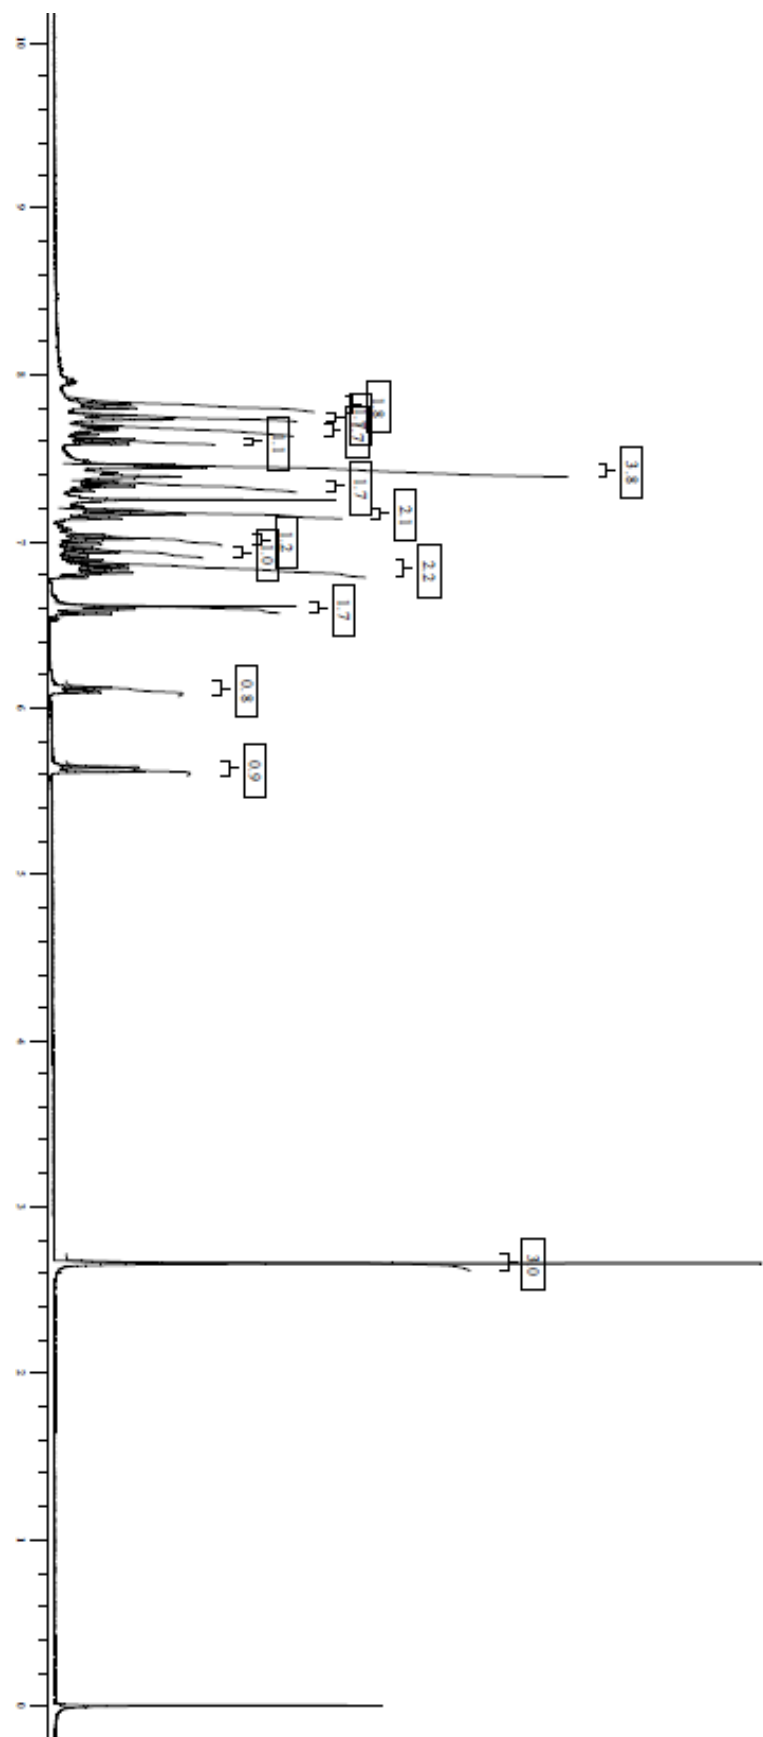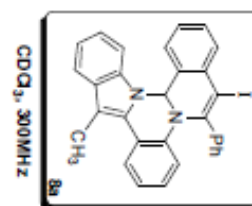

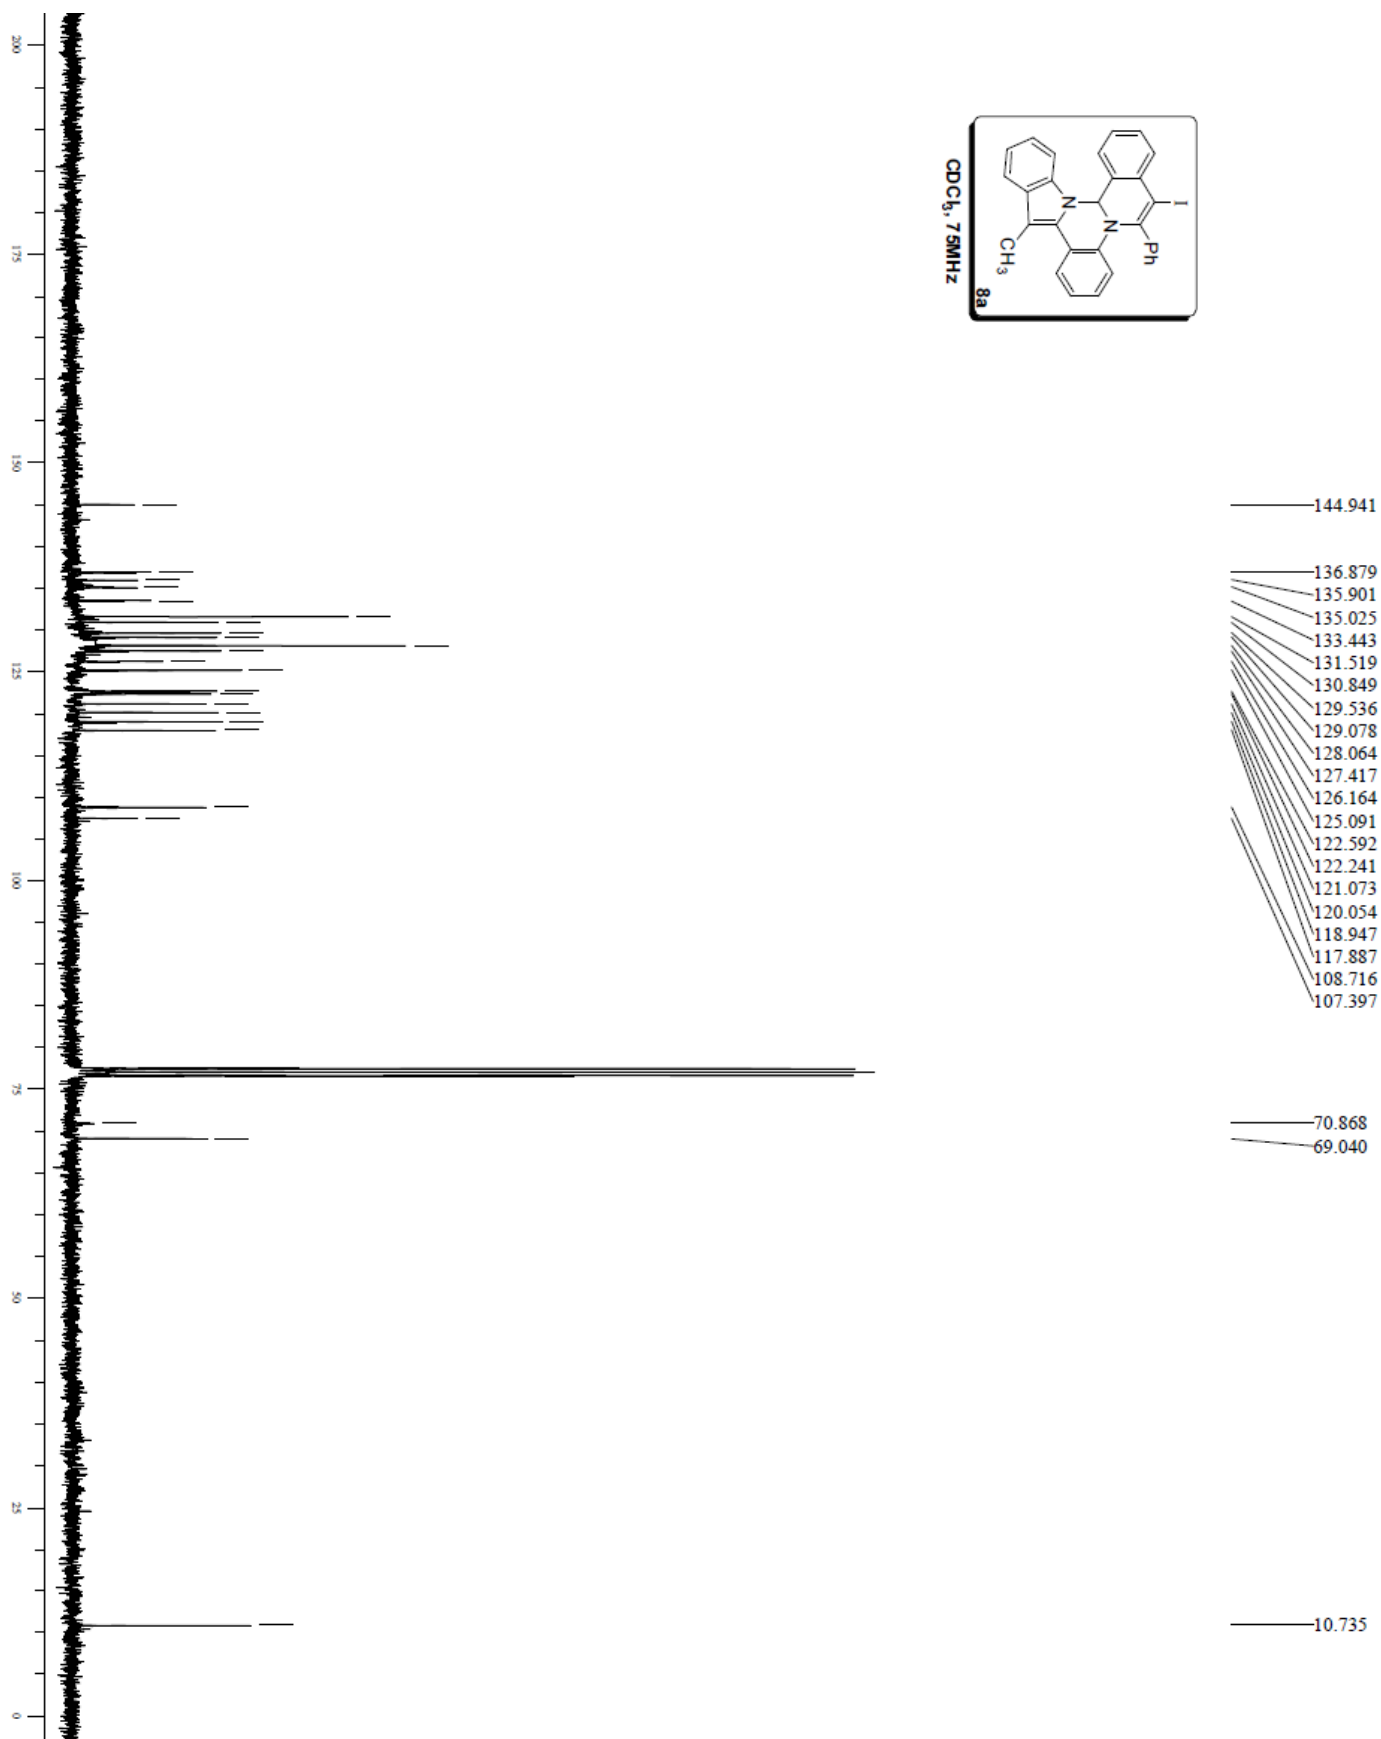

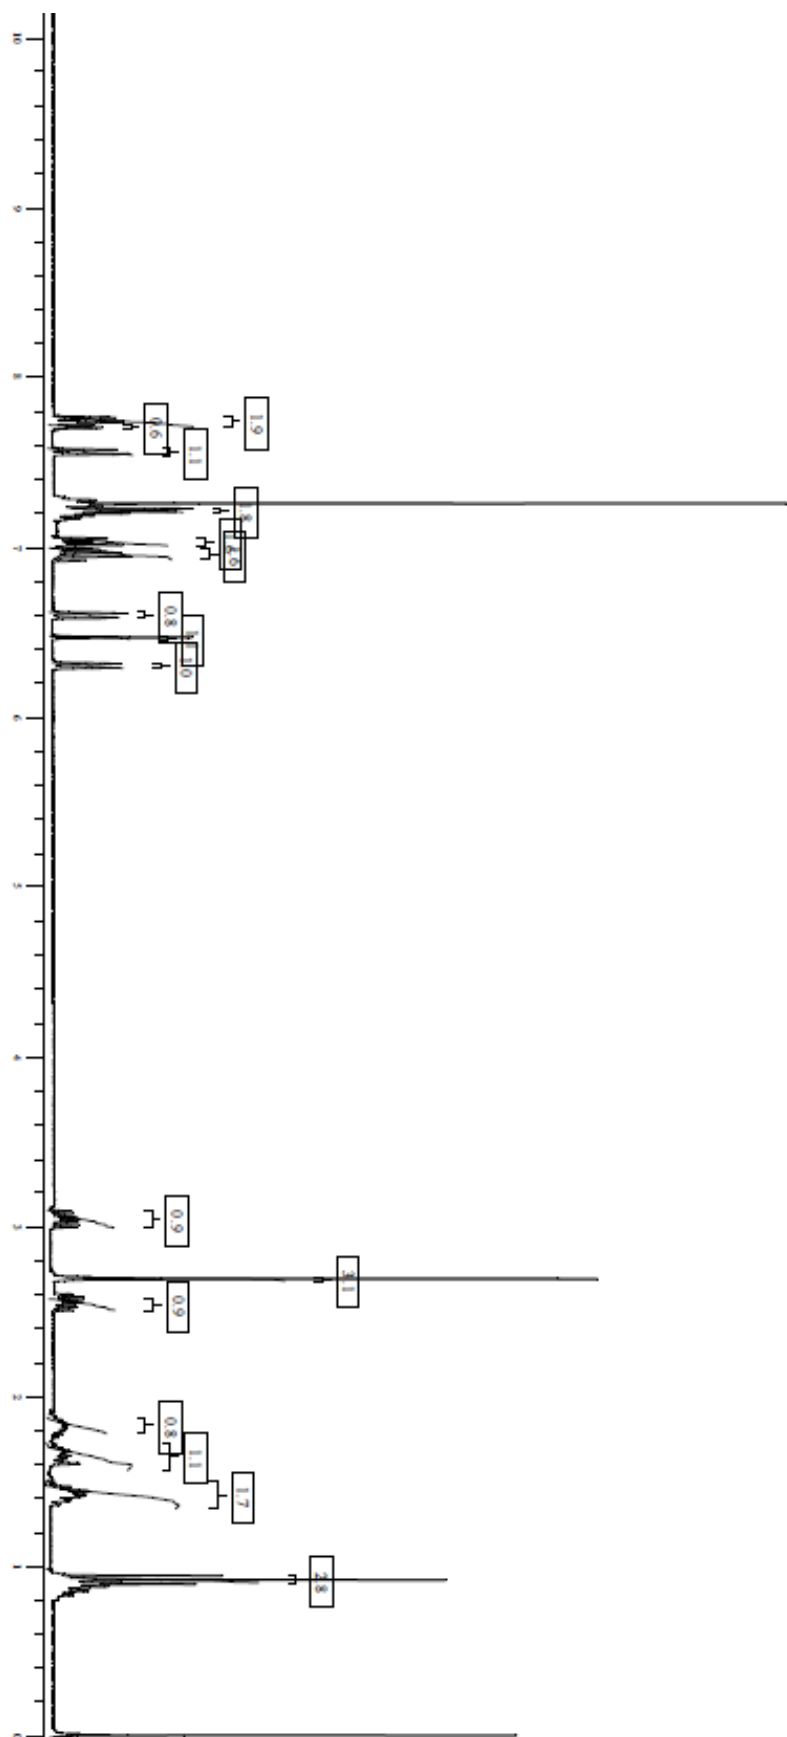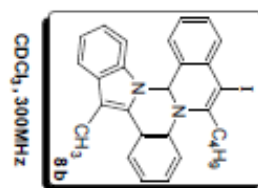

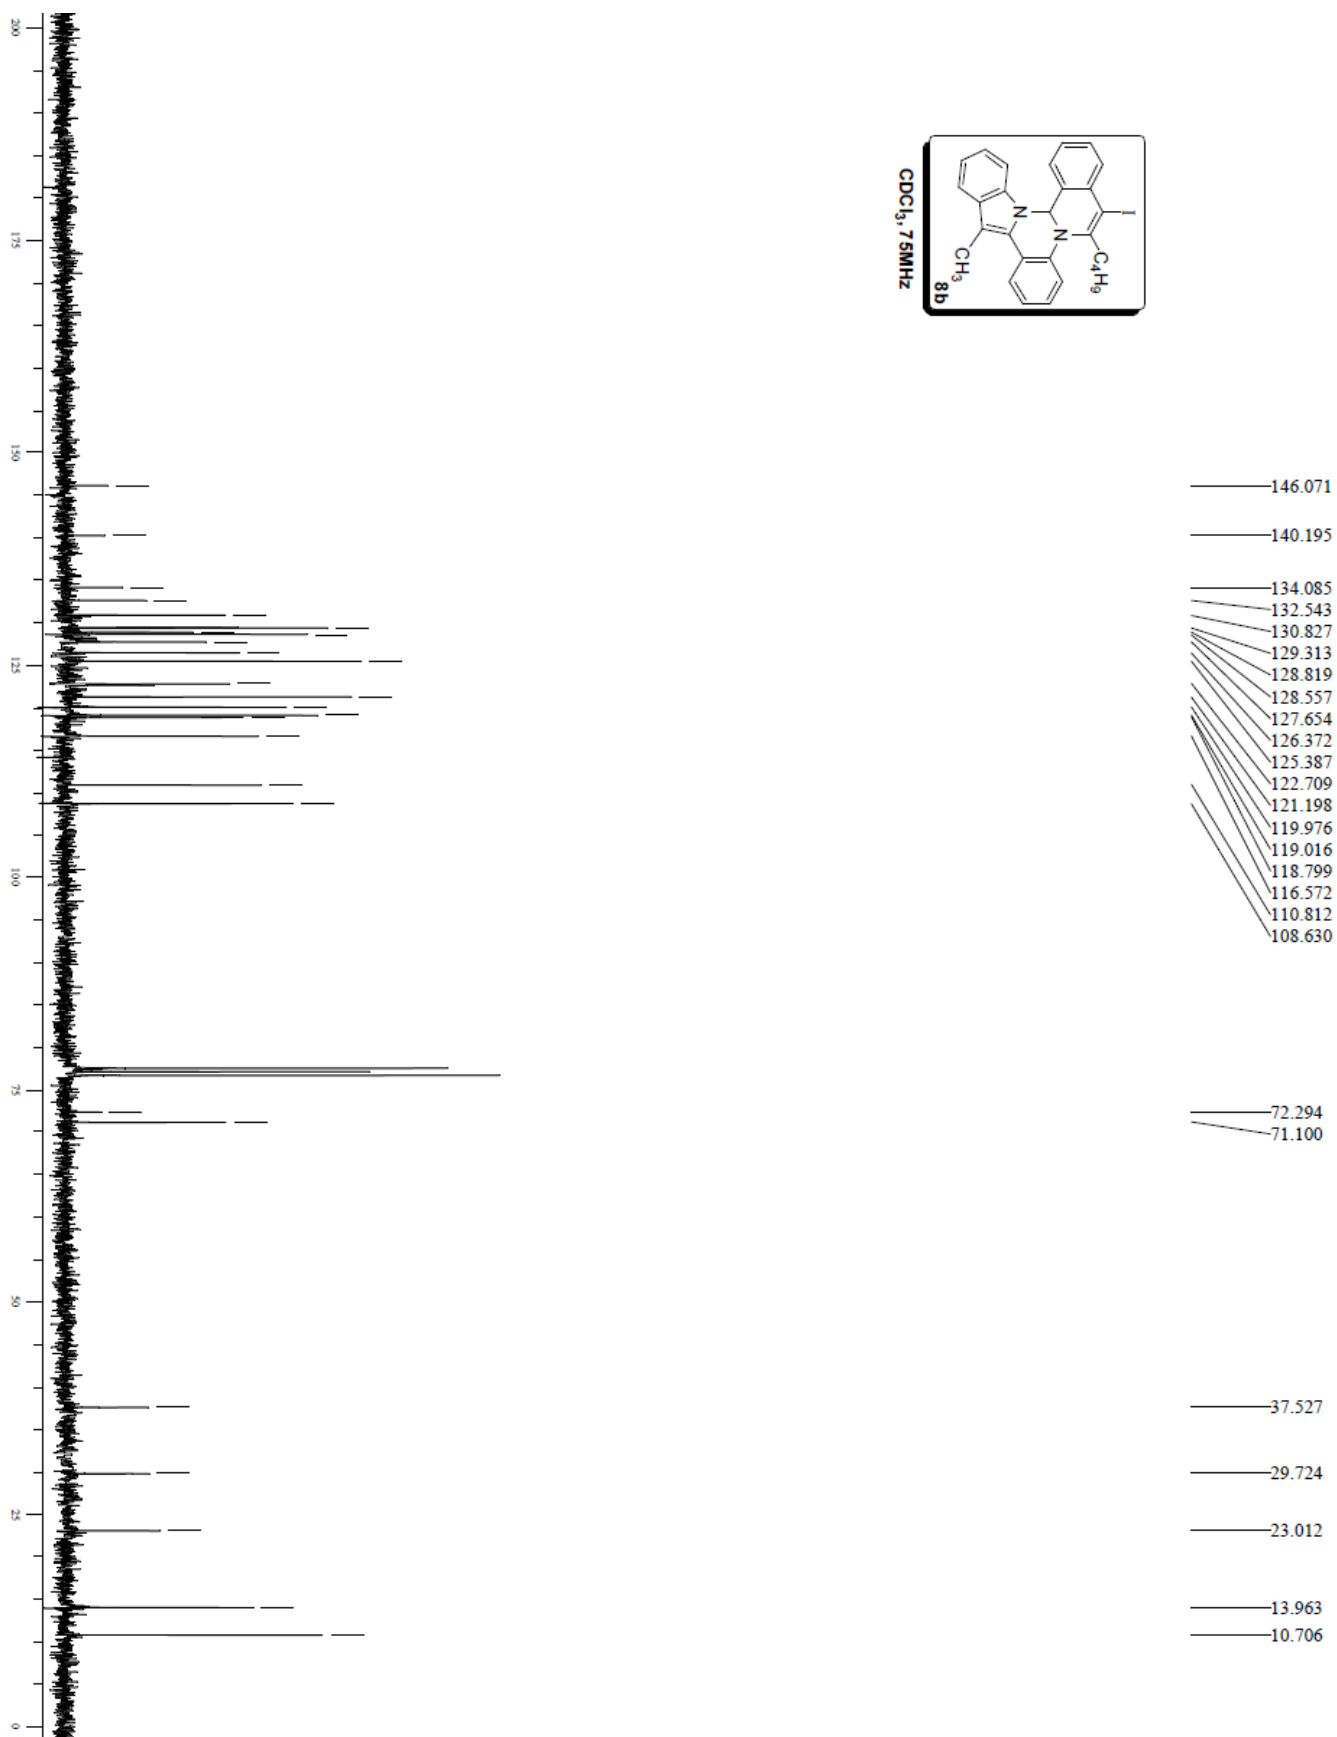

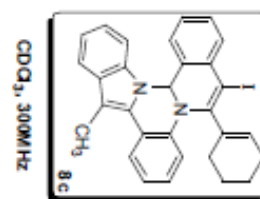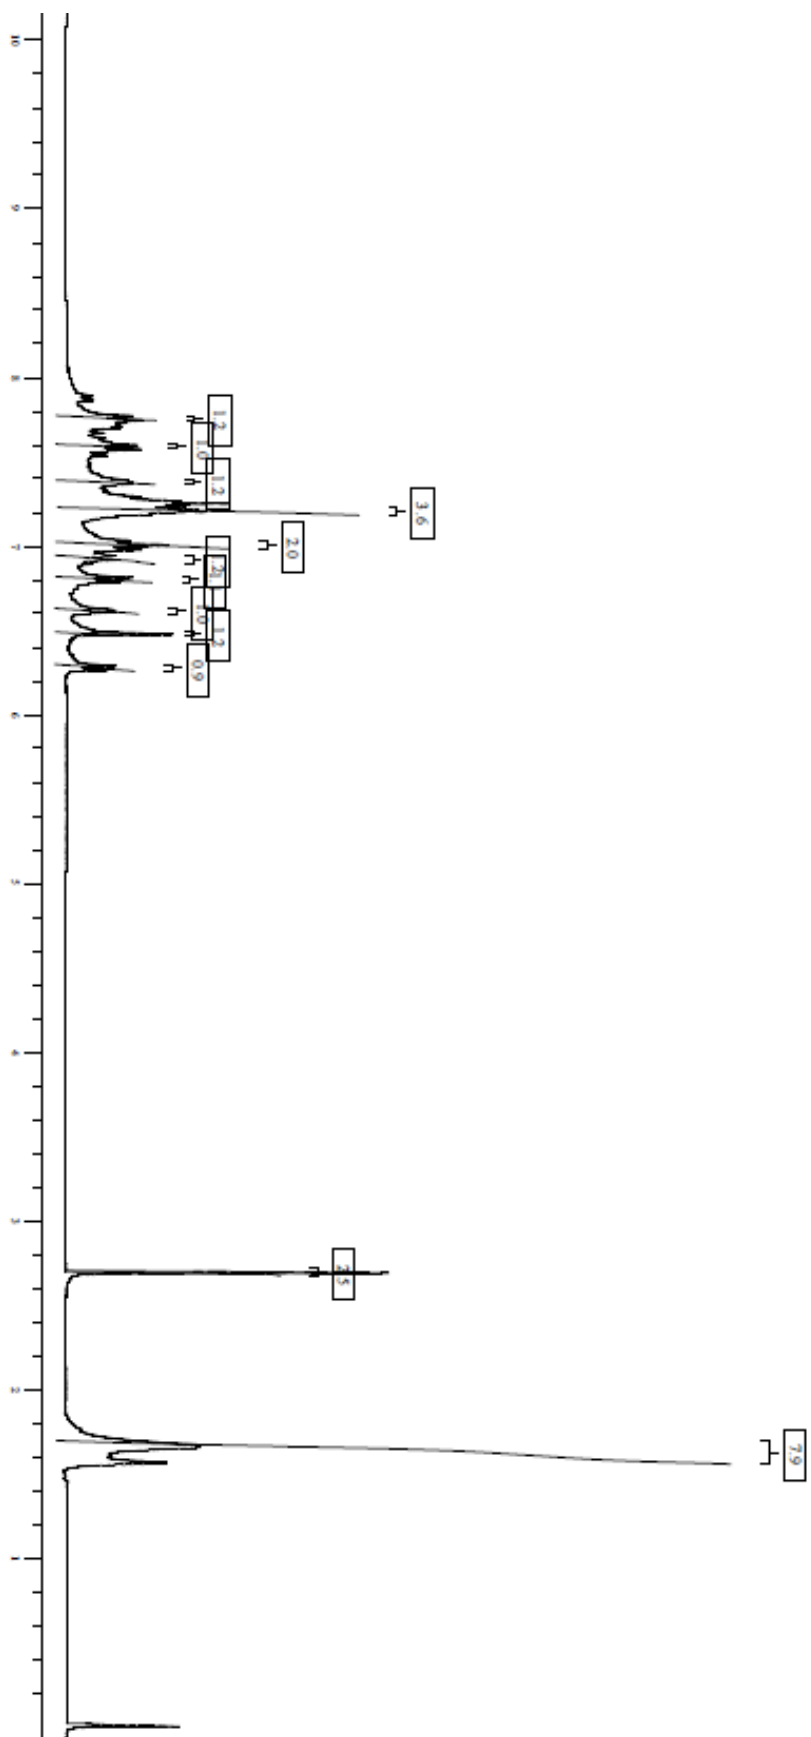

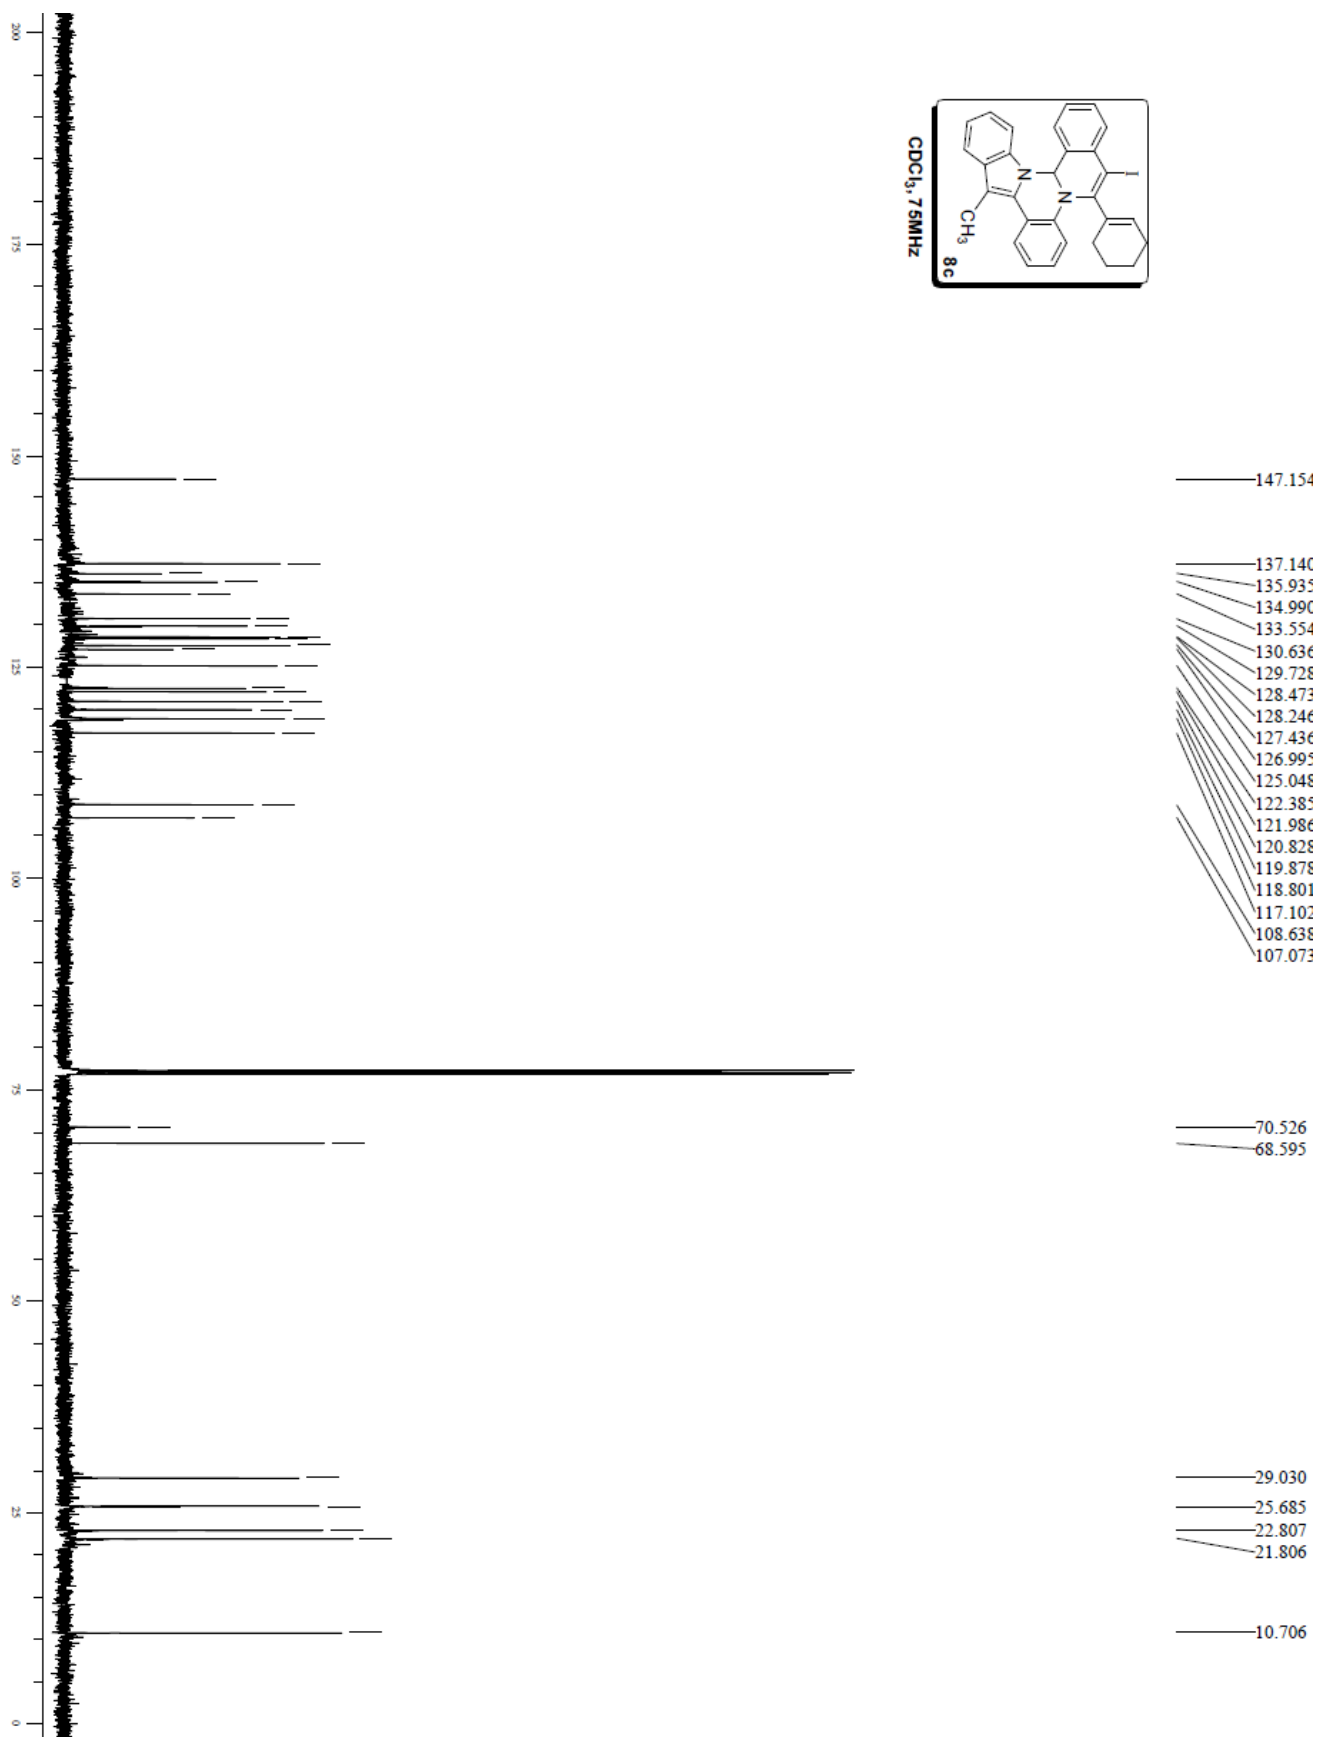

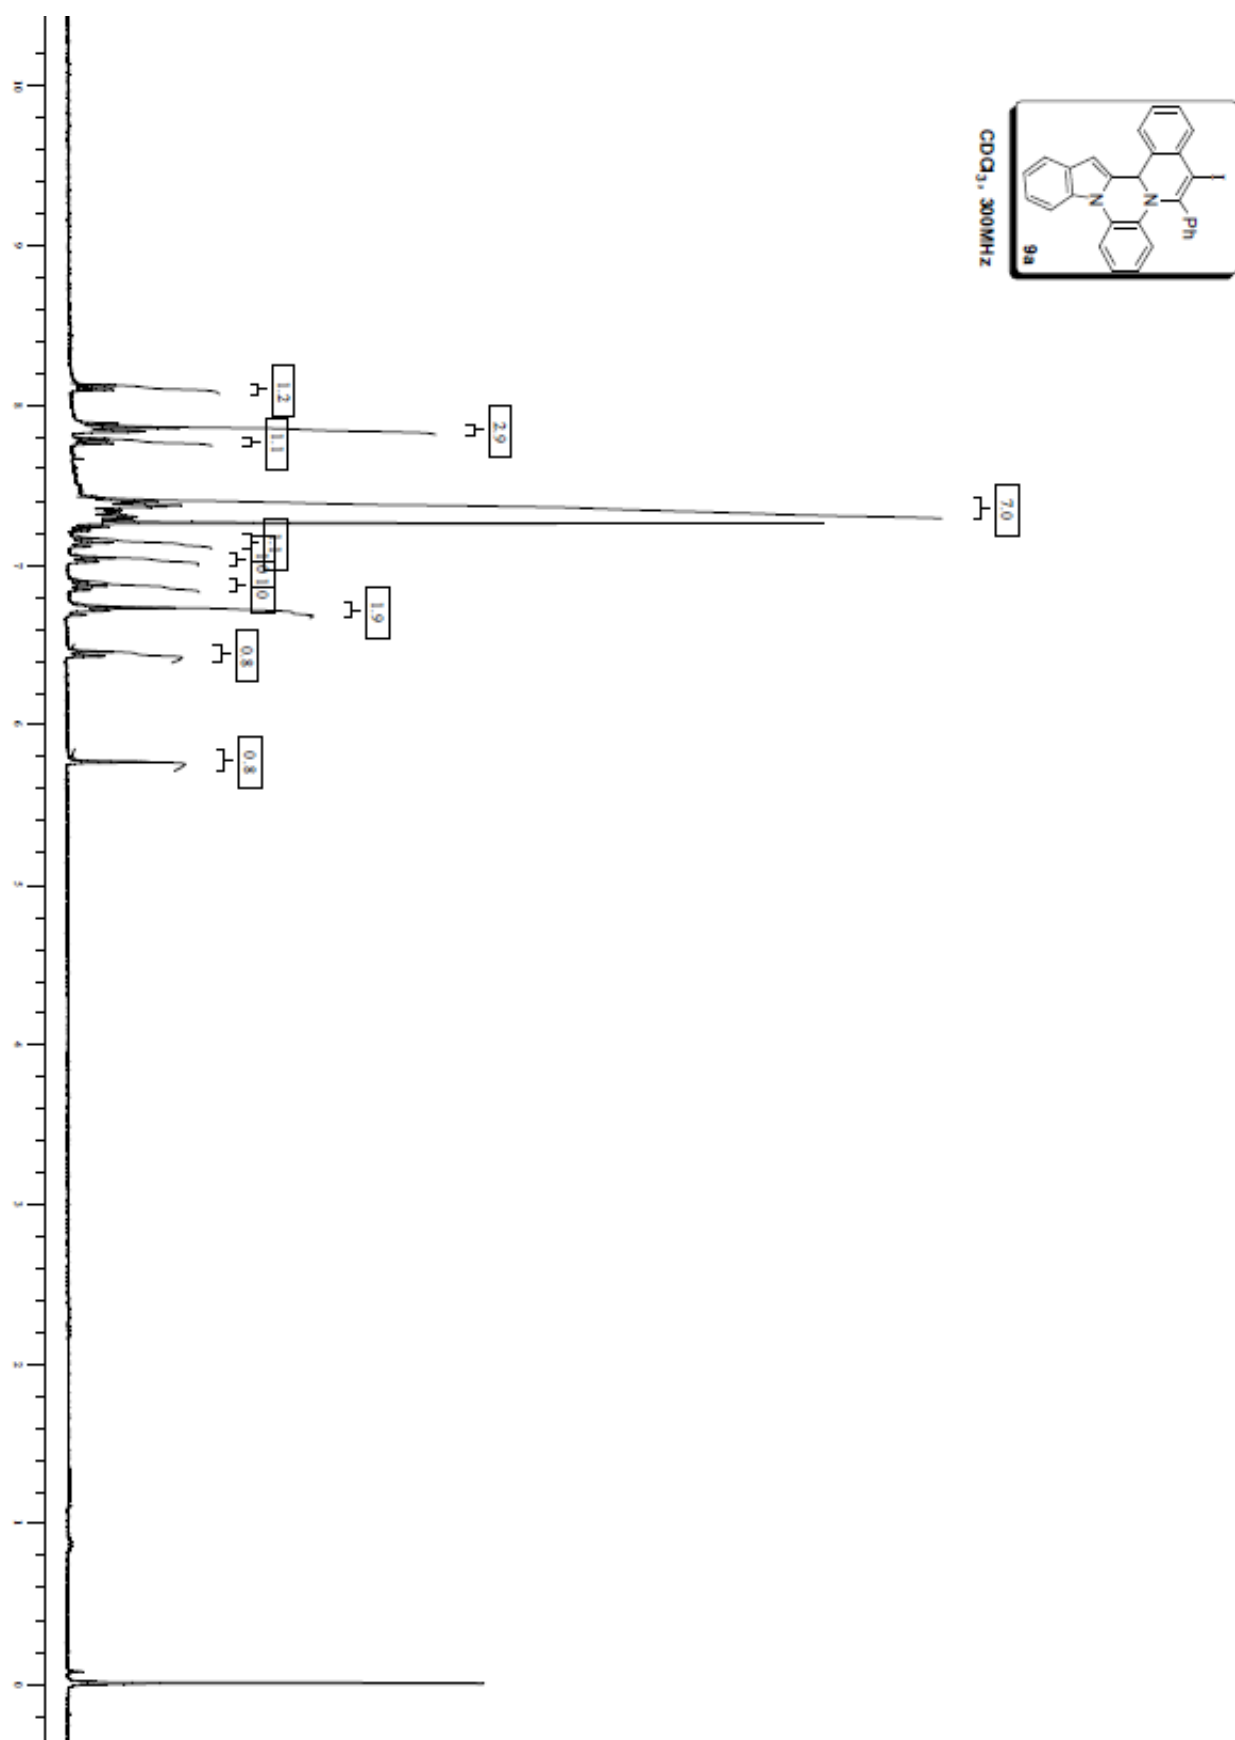



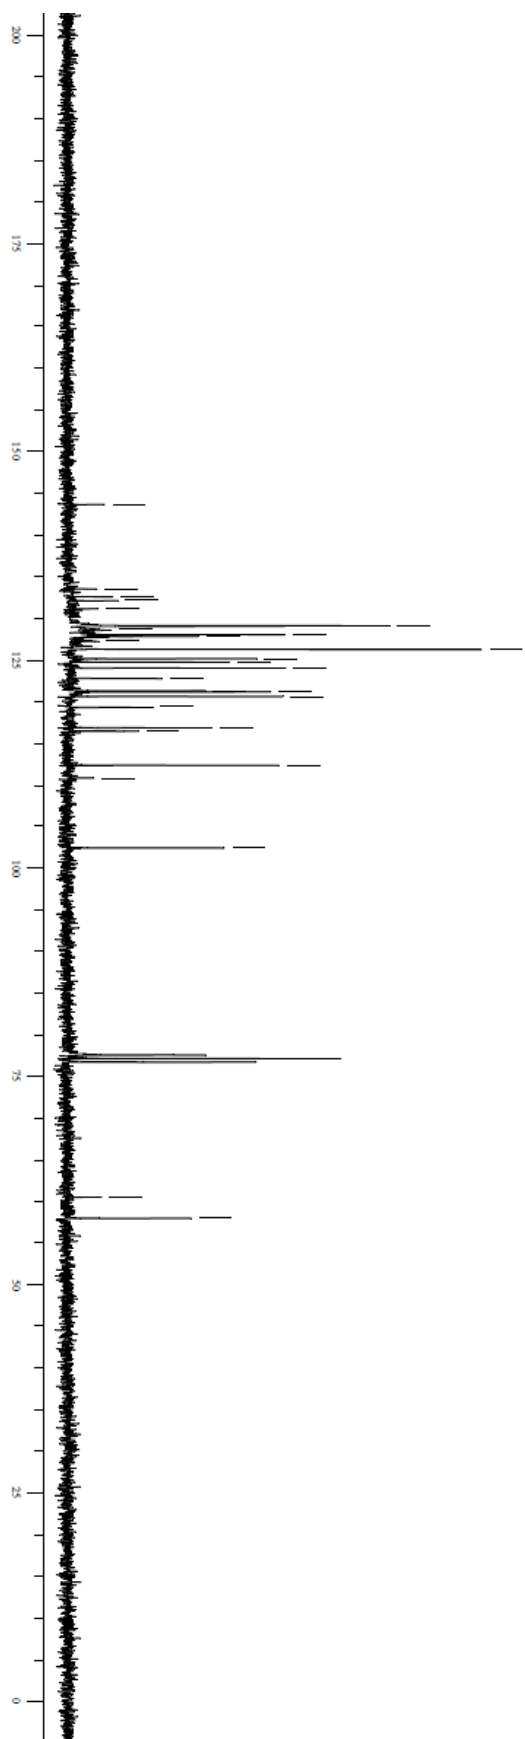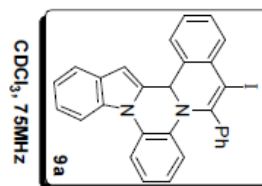

|         |
|---------|
| 143.599 |
| 133.474 |
| 132.513 |
| 132.049 |
| 131.088 |
| 129.052 |
| 128.495 |
| 127.976 |
| 127.772 |
| 127.151 |
| 126.172 |
| 125.096 |
| 124.688 |
| 123.962 |
| 122.708 |
| 121.226 |
| 121.111 |
| 120.557 |
| 119.242 |
| 116.805 |
| 116.389 |
| 112.295 |
| 110.783 |
| 102.375 |
| 60.453  |
| 57.892  |

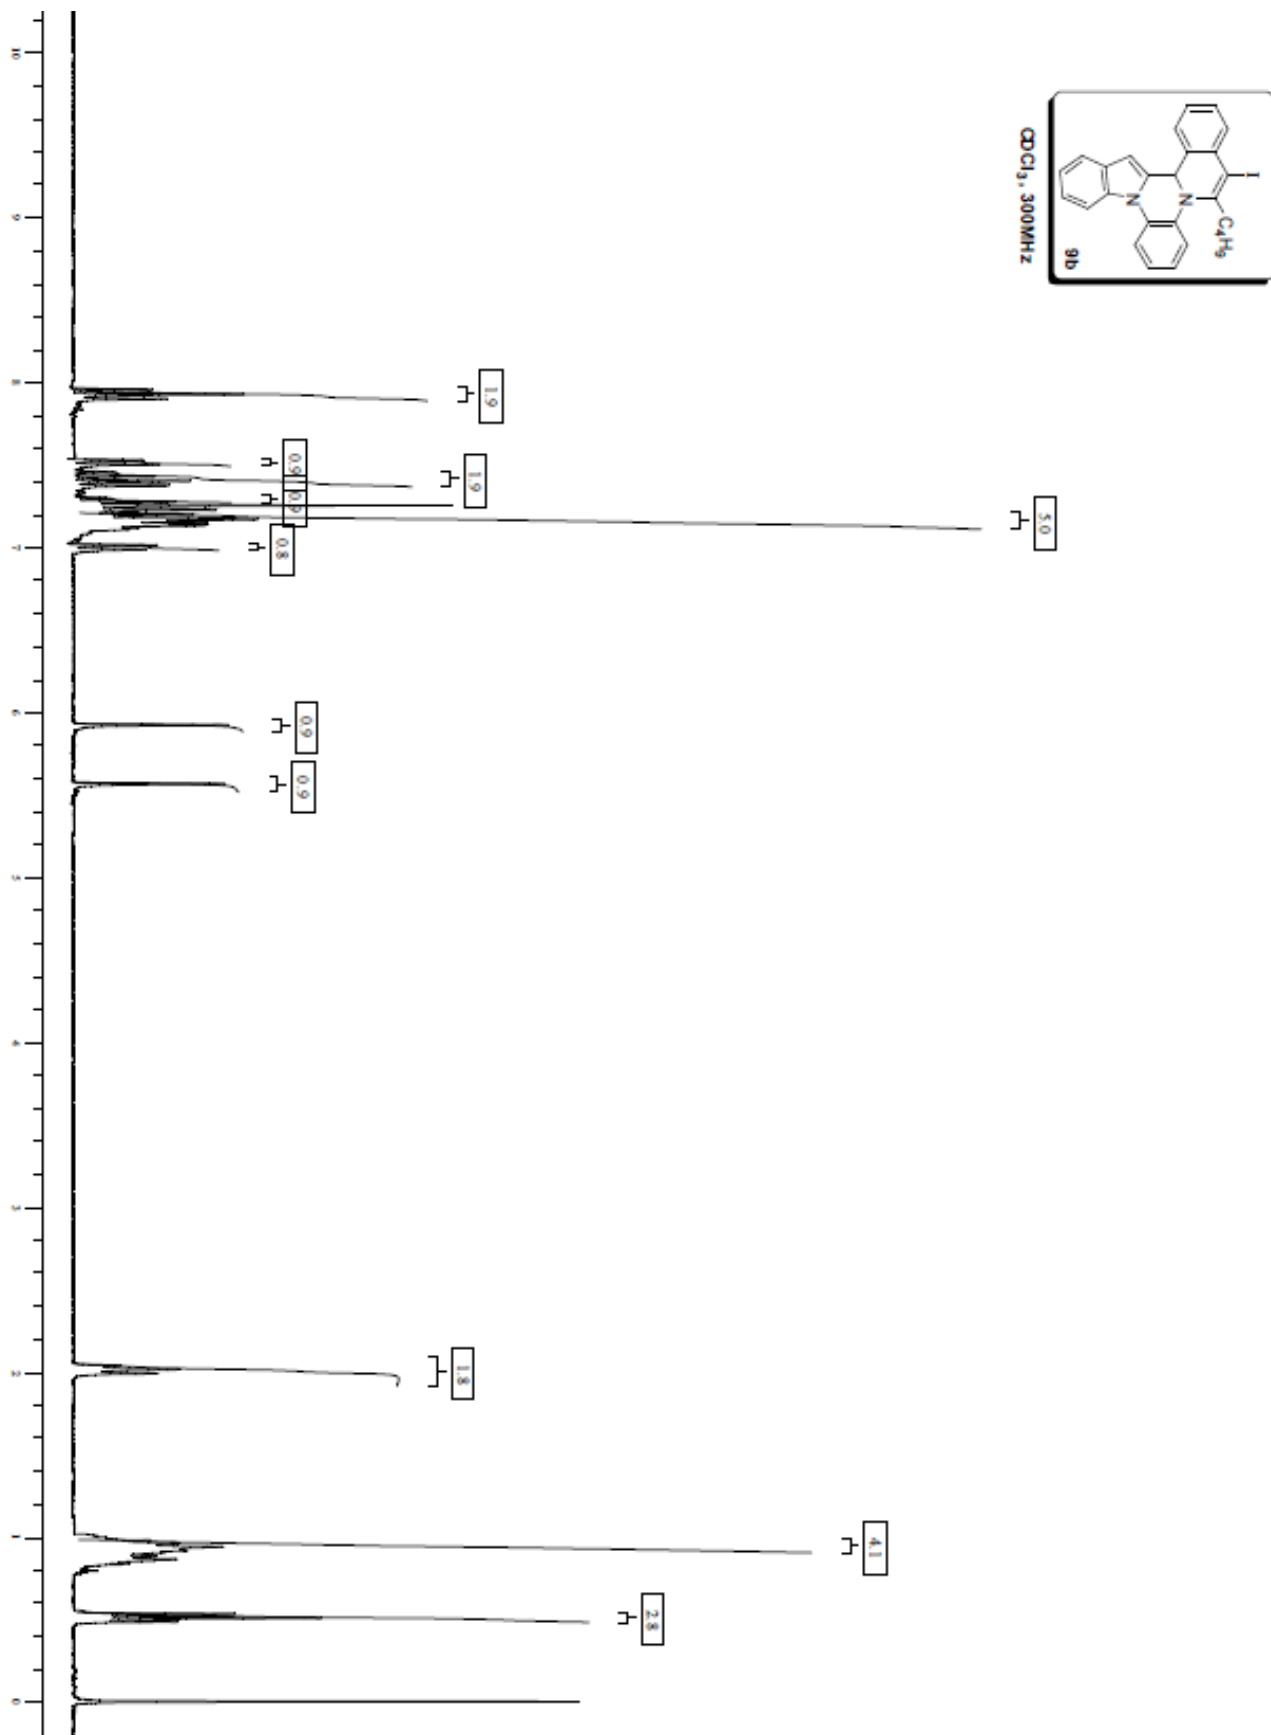

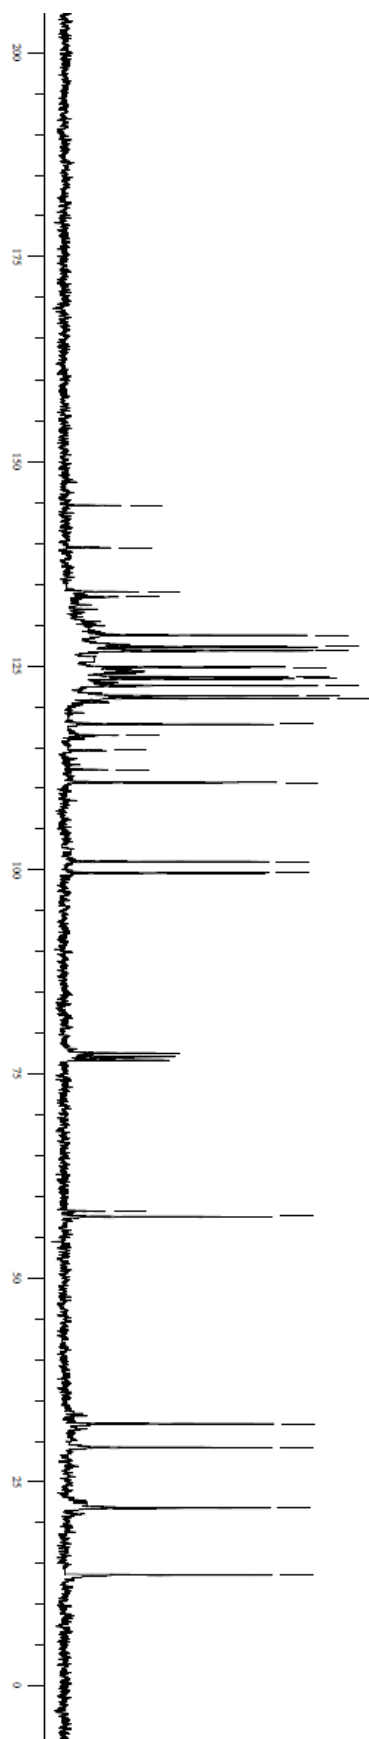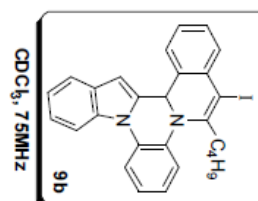

144.528  
139.373  
133.938  
133.307  
128.624  
127.196  
126.712  
124.718  
123.533  
123.301  
122.441  
121.198  
120.893  
117.708  
116.363  
114.499  
112.160  
110.610  
100.888  
99.511

58.060  
57.391

32.039  
29.123  
21.735  
13.517

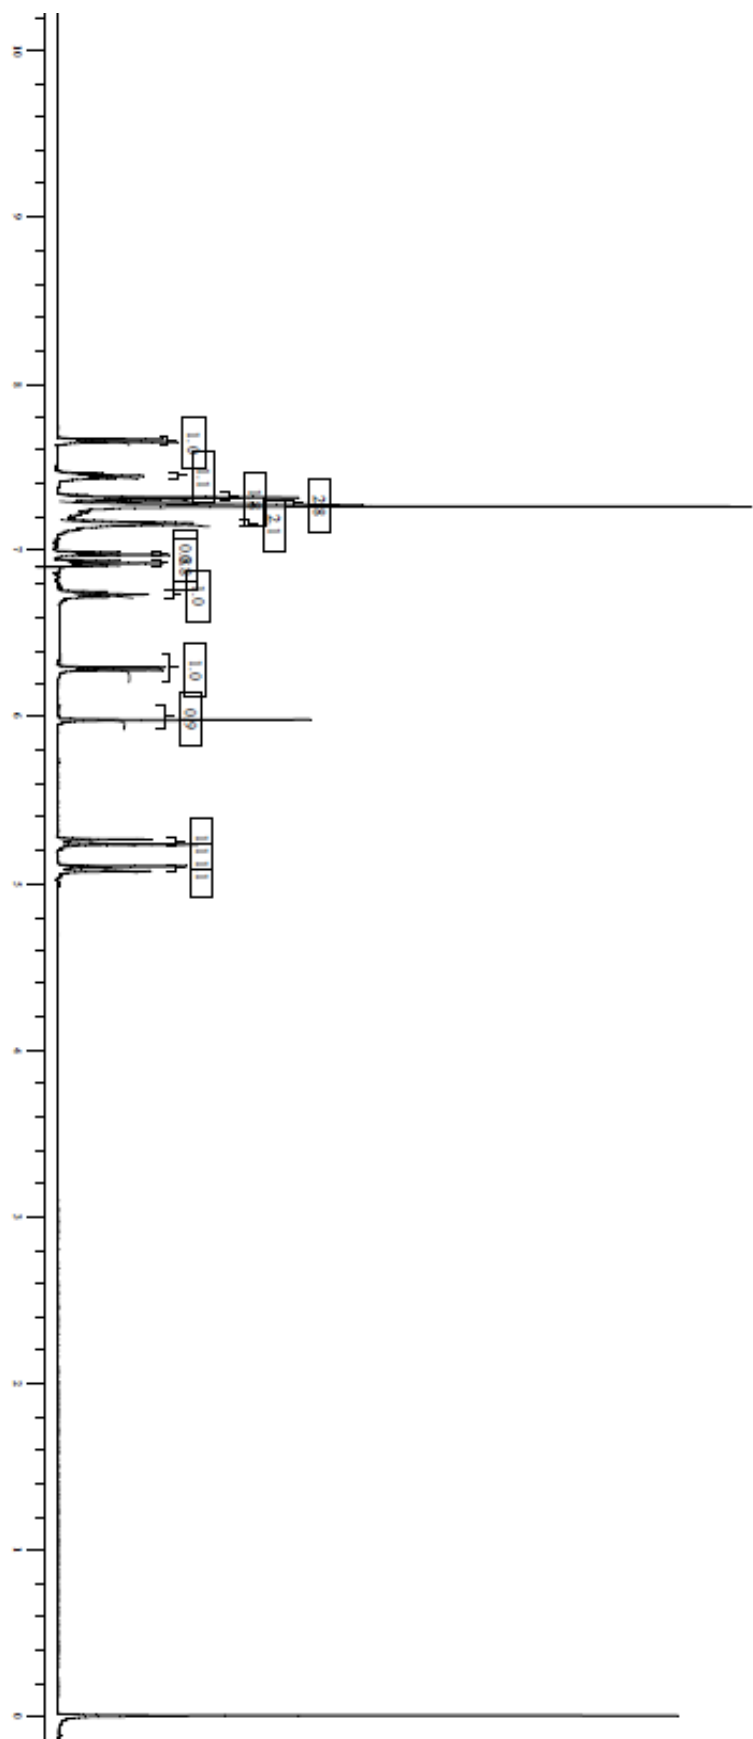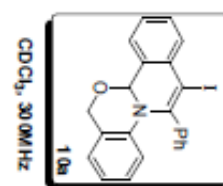

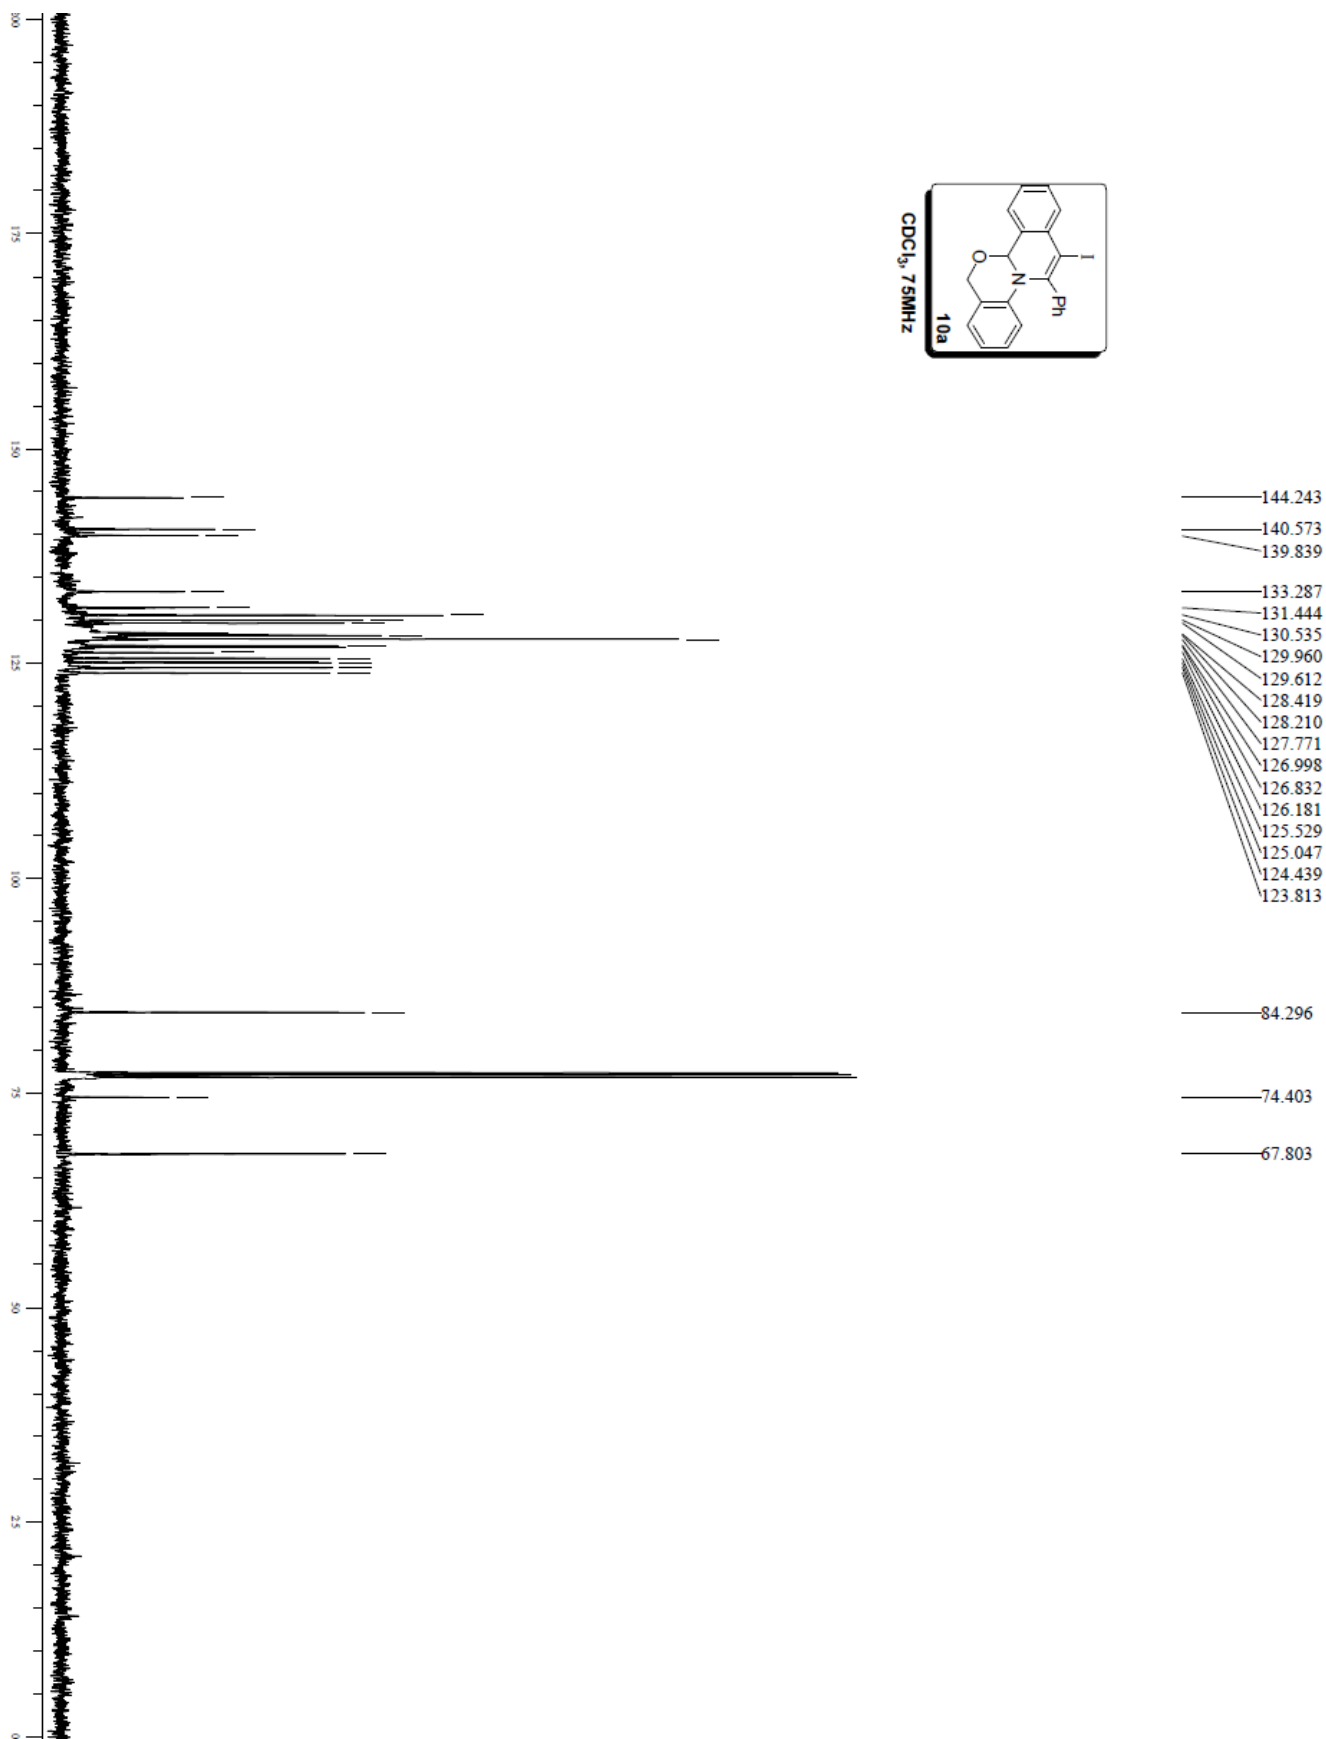

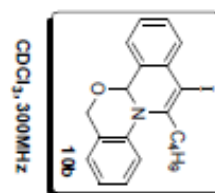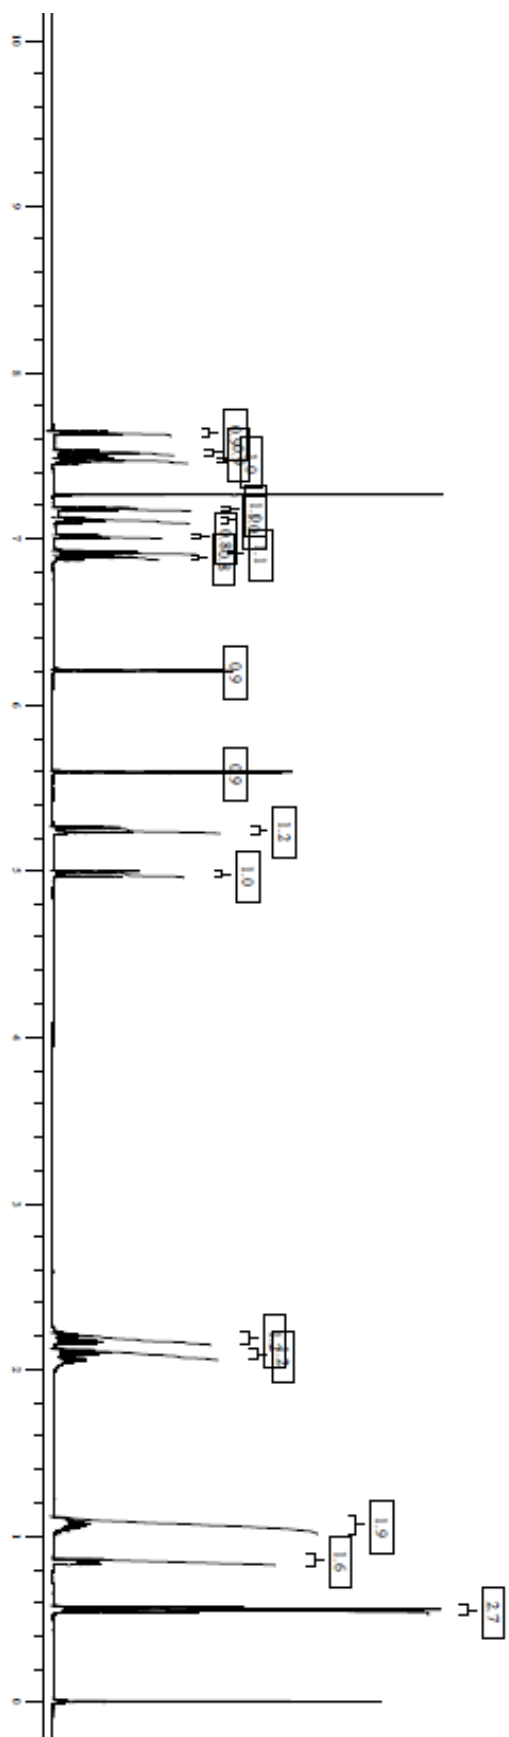

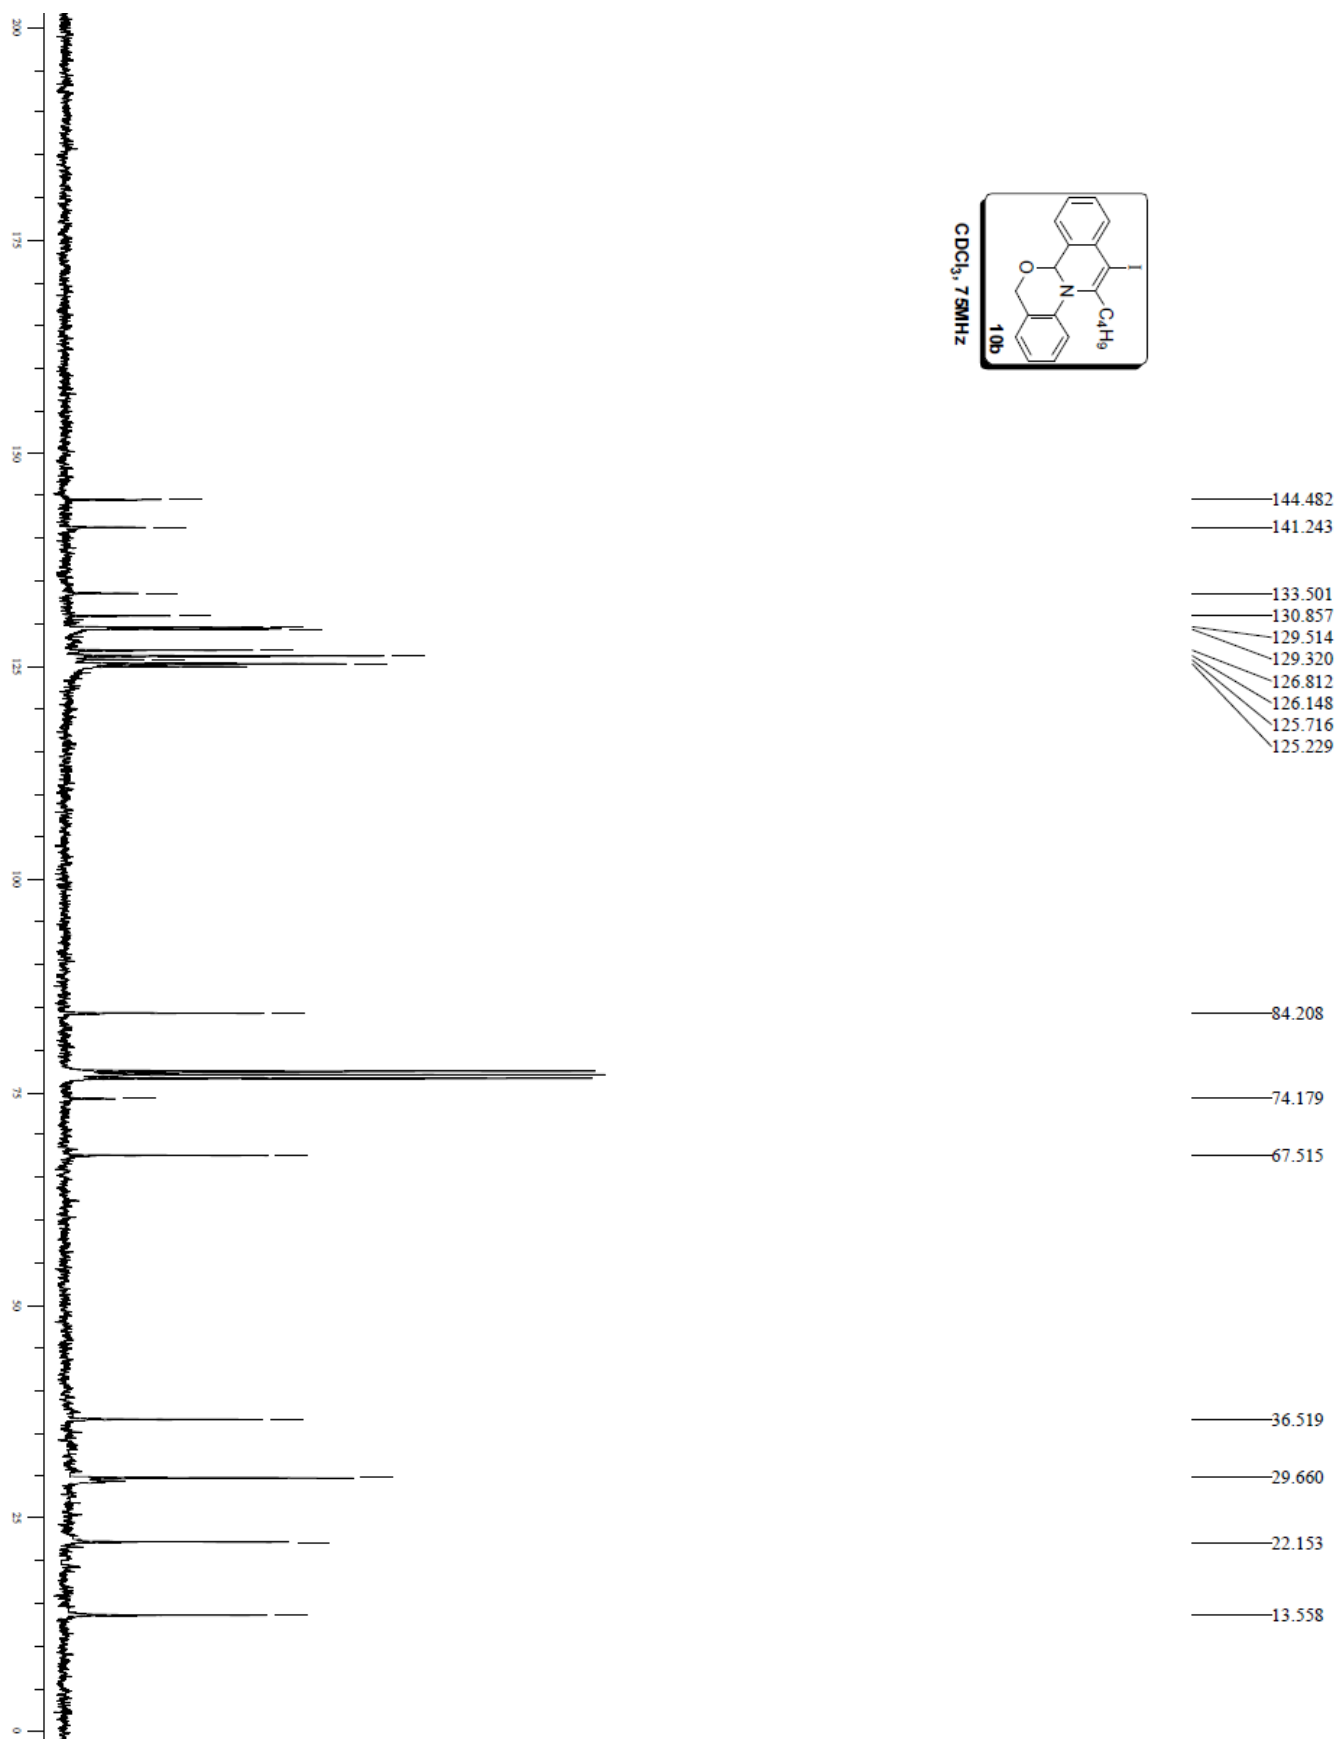

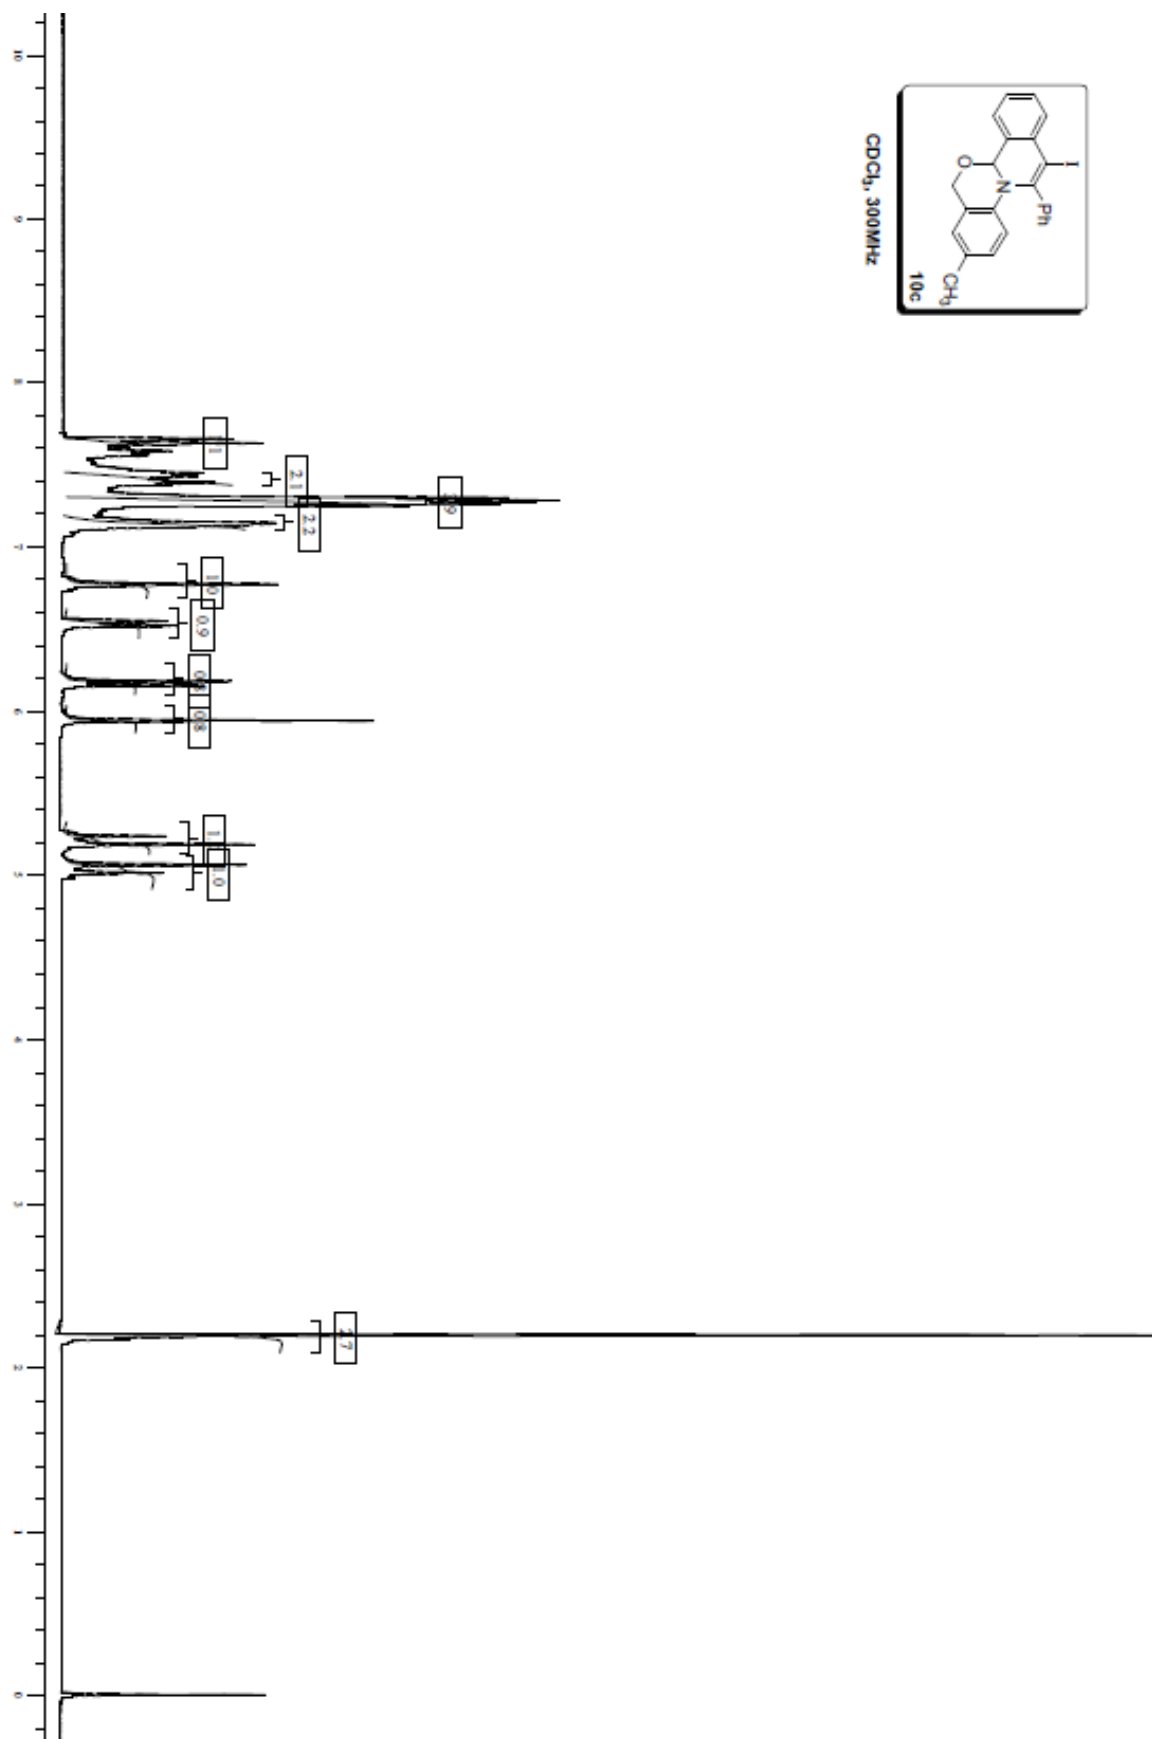



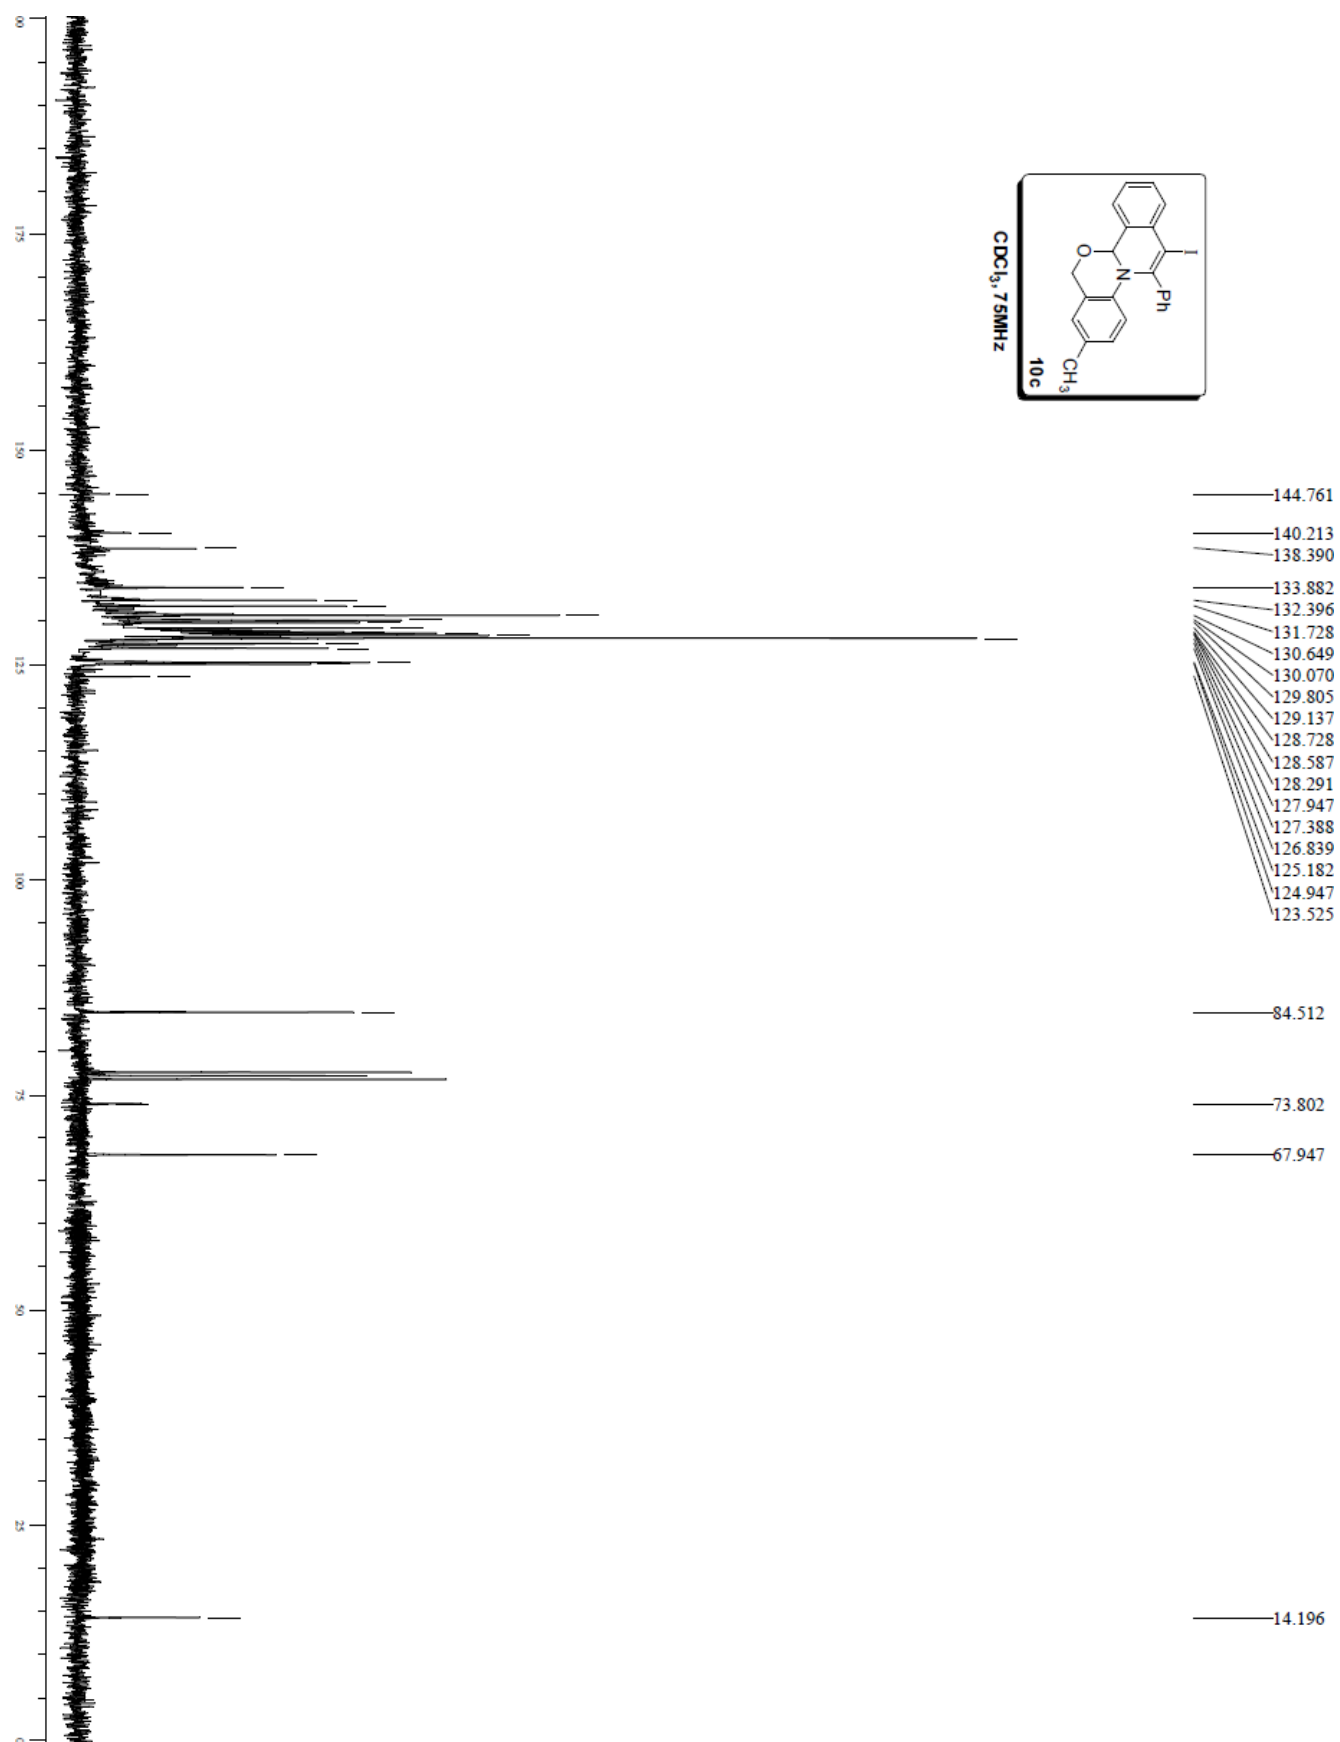

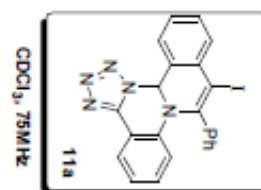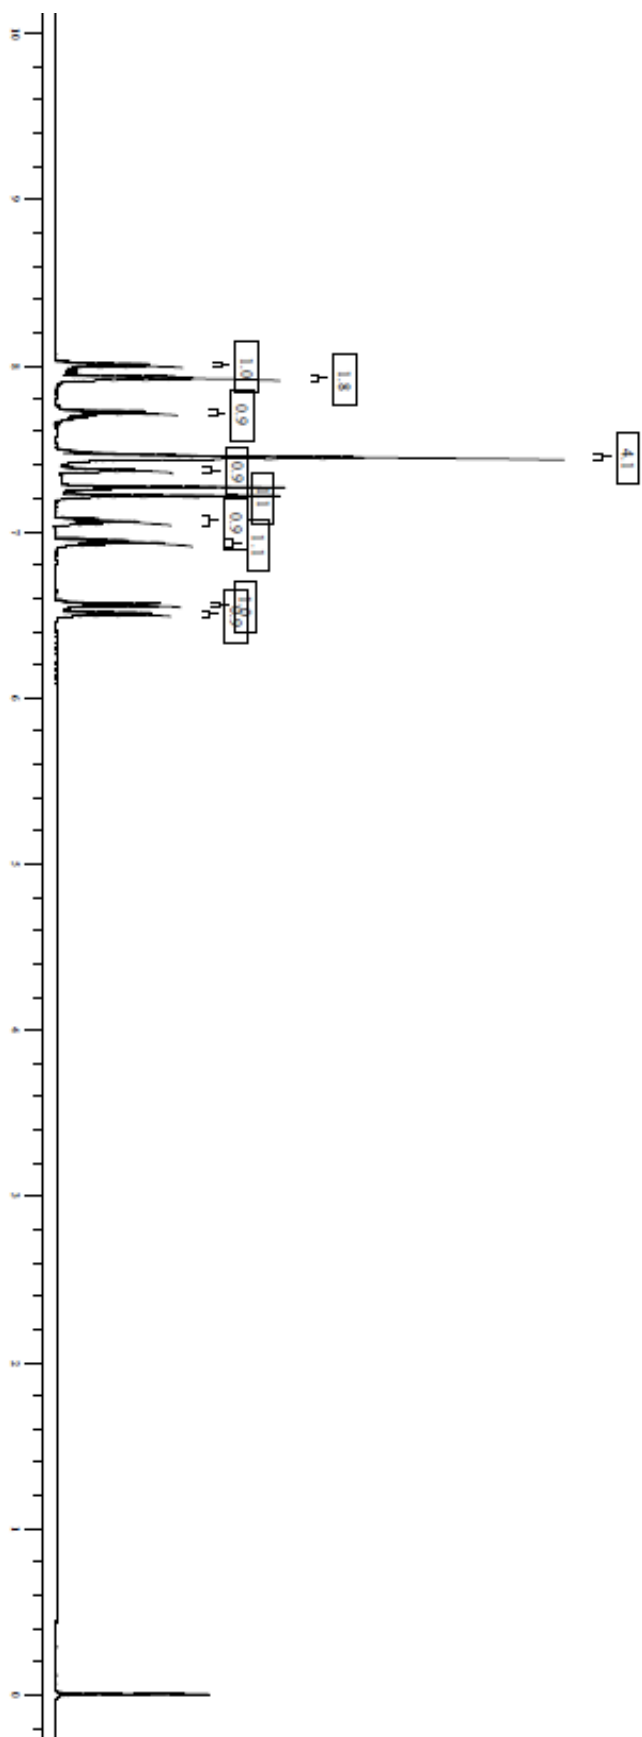

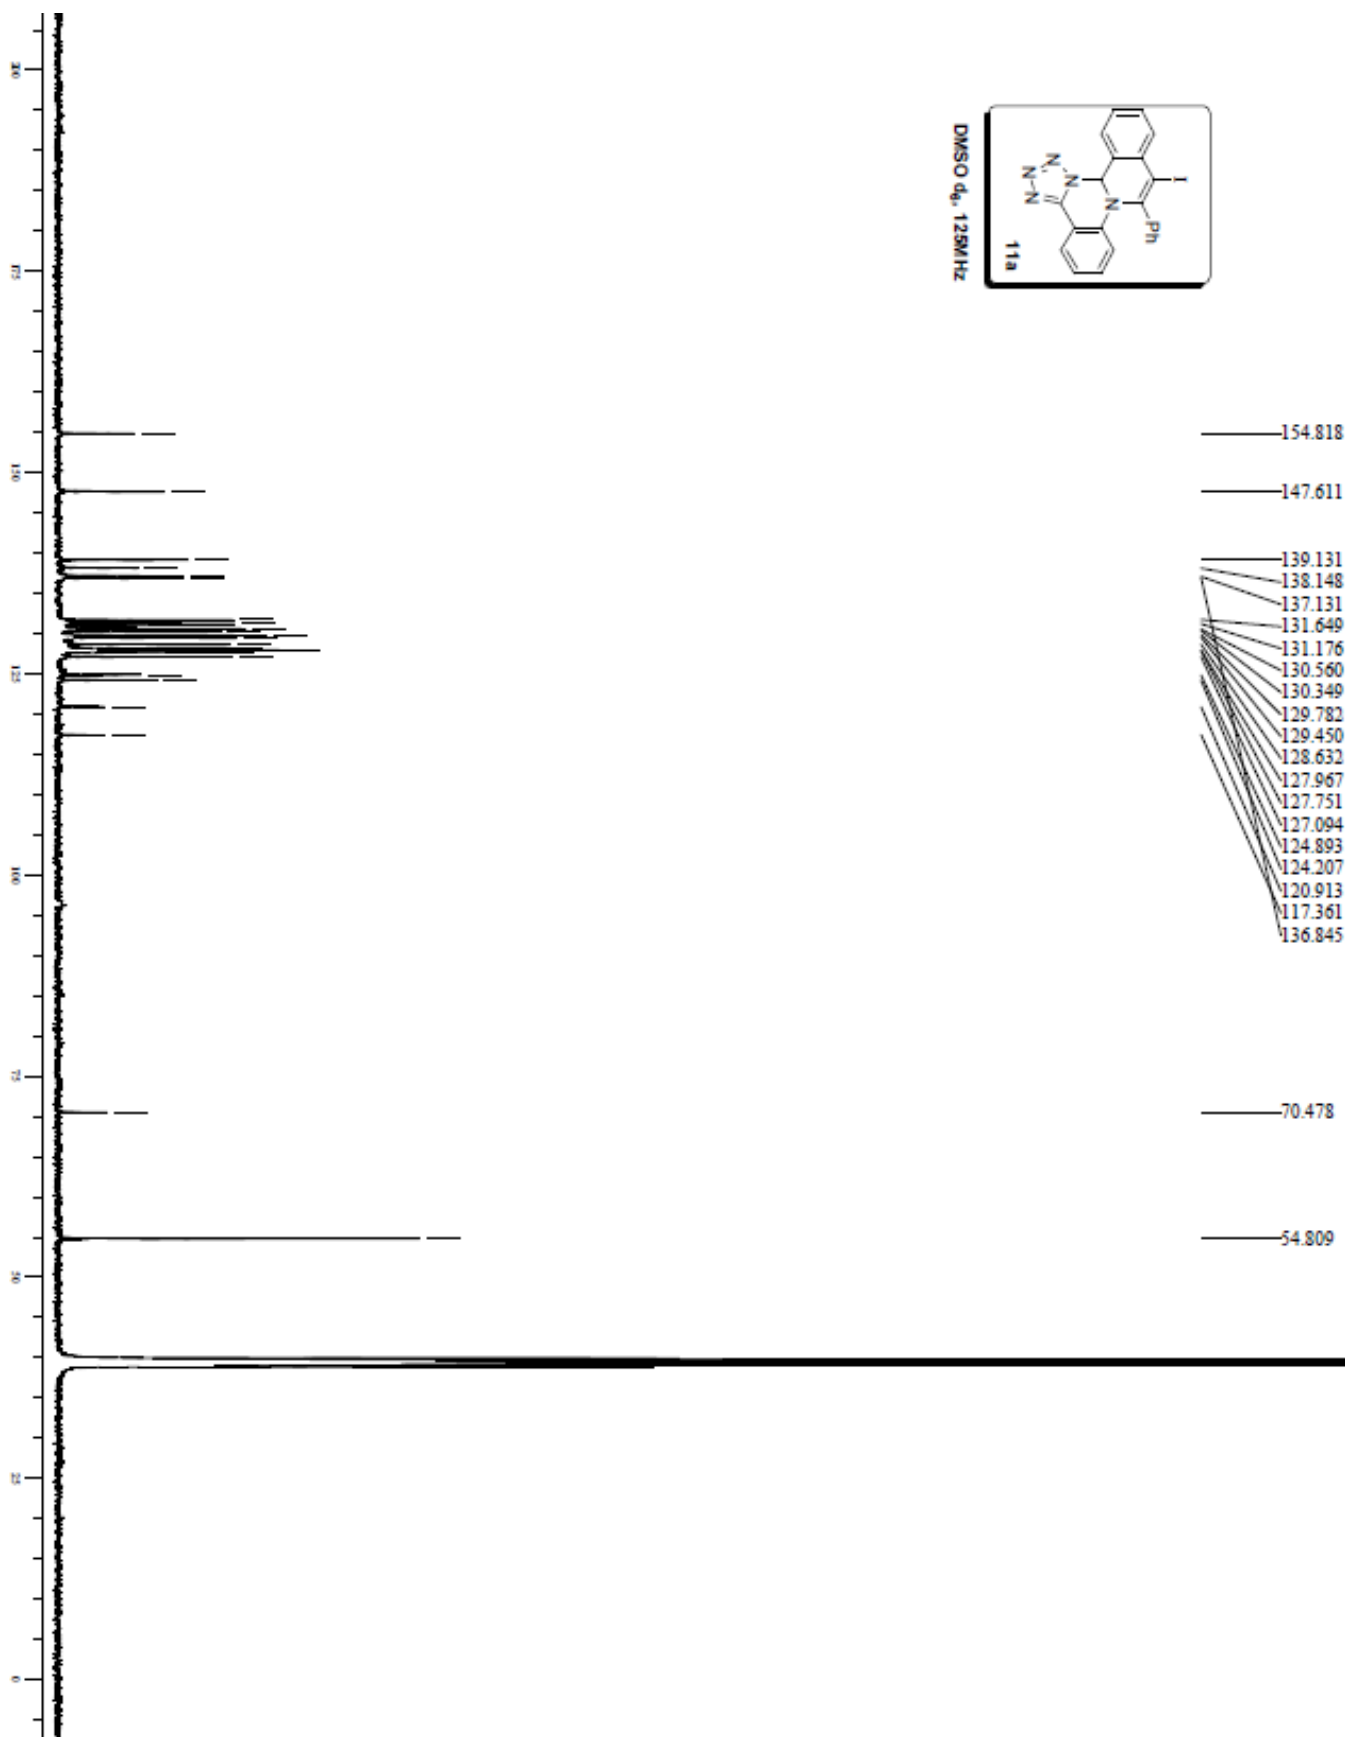

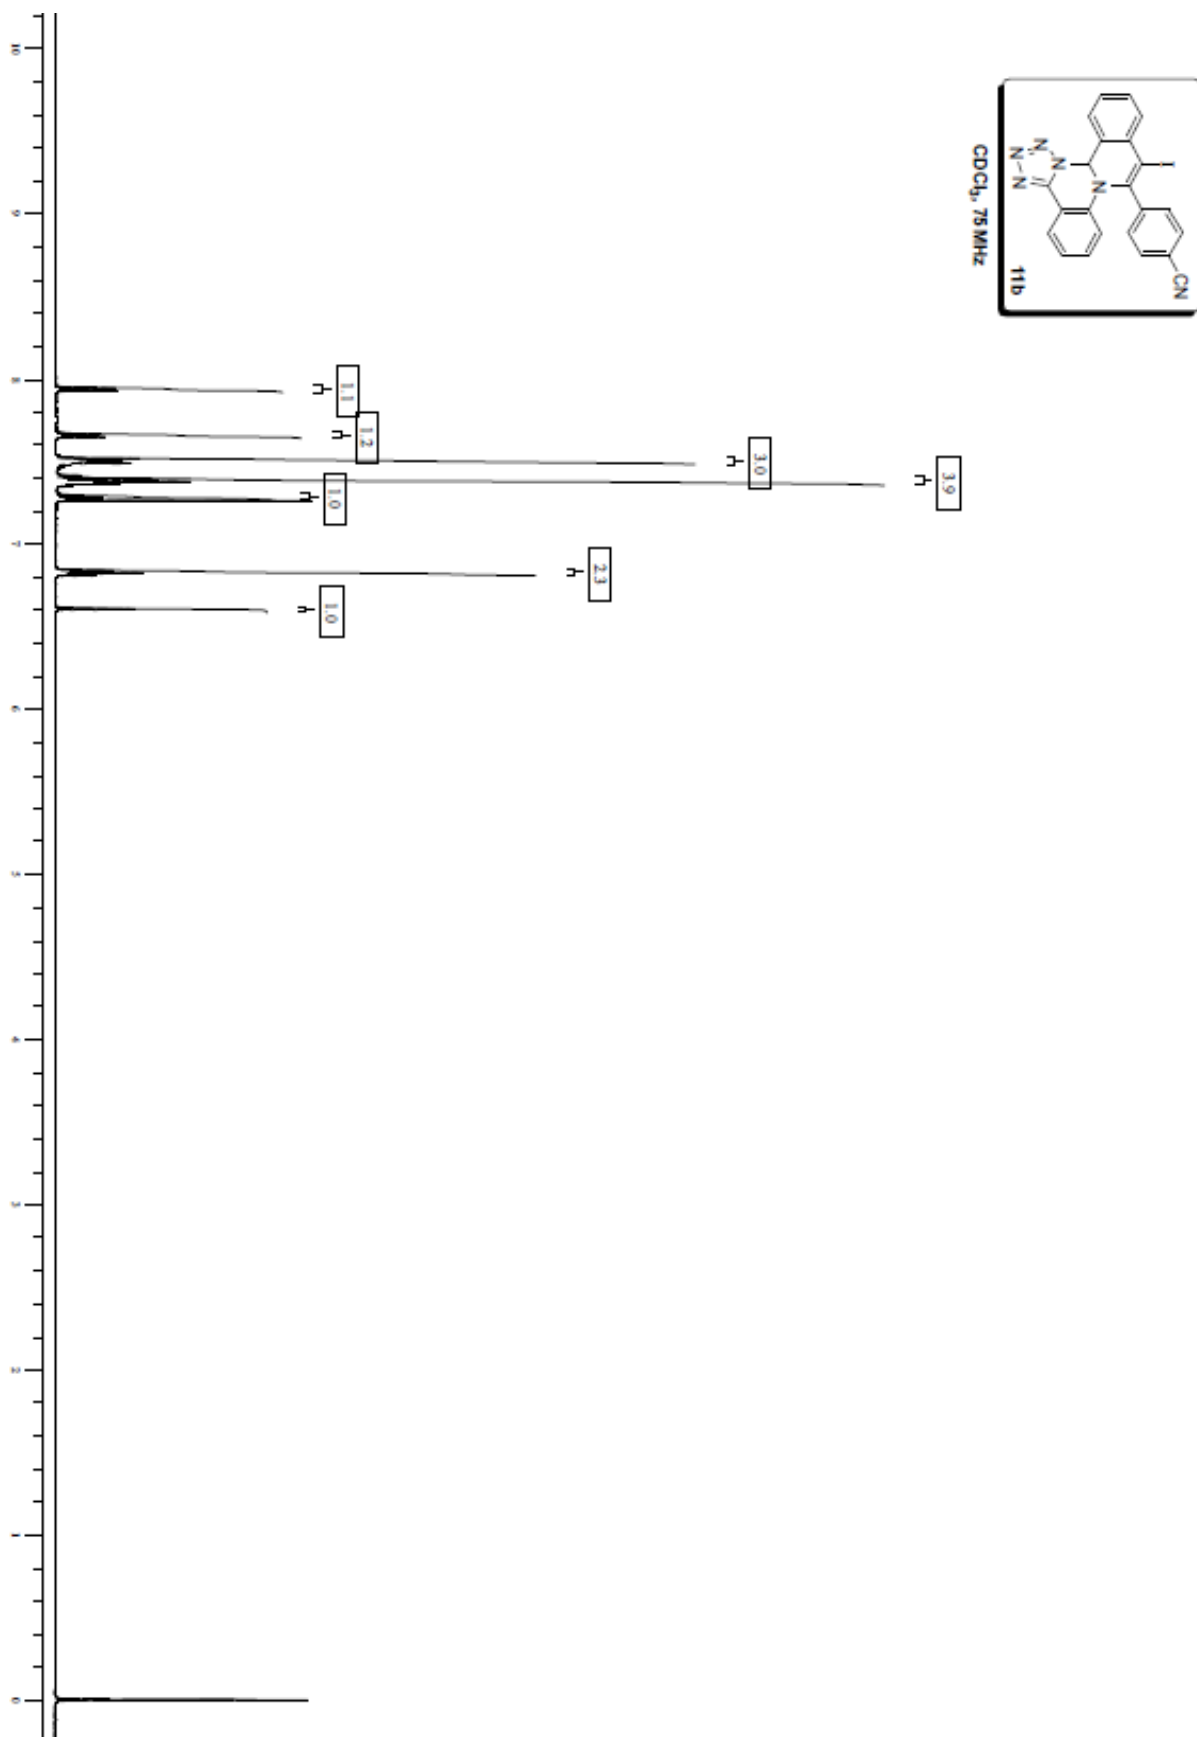

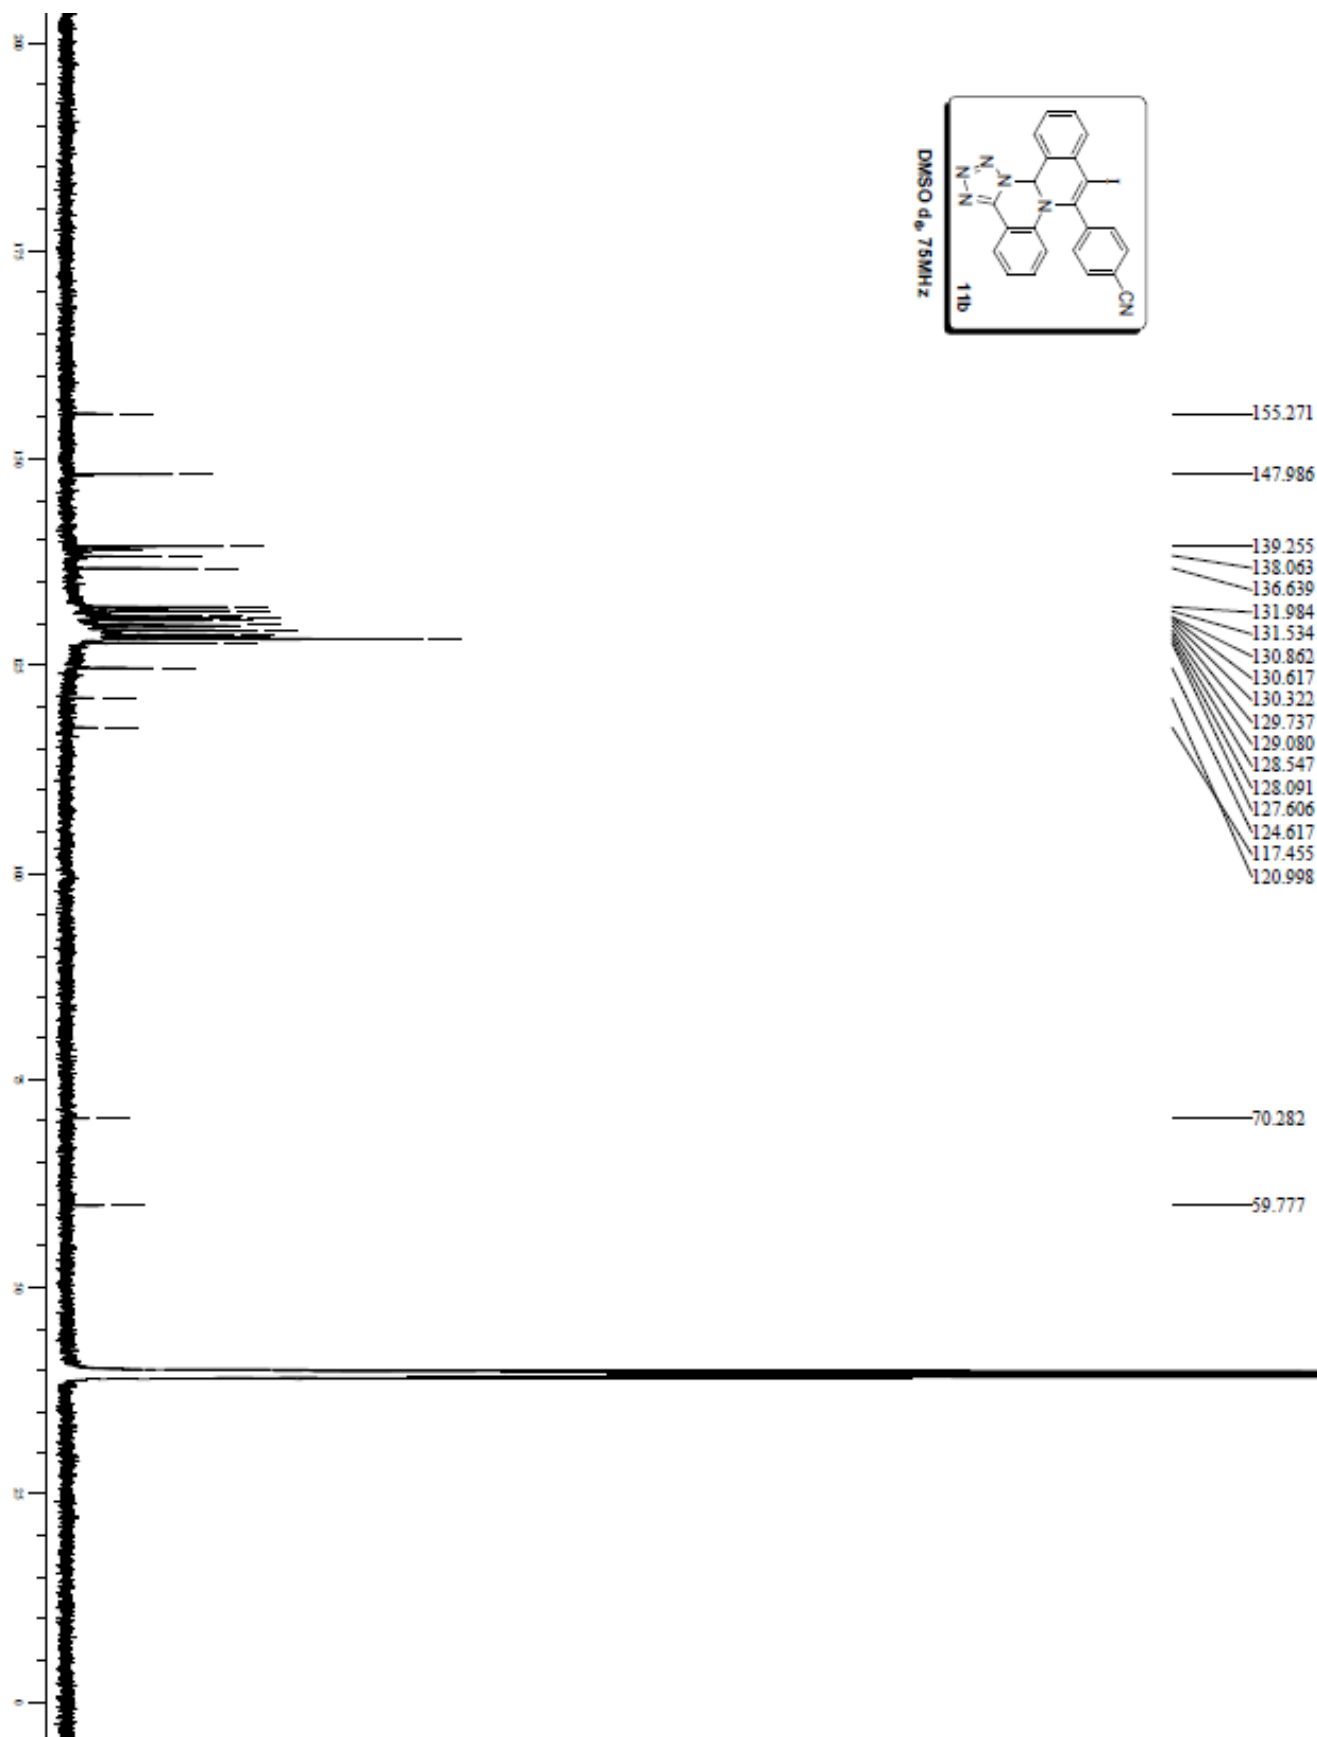

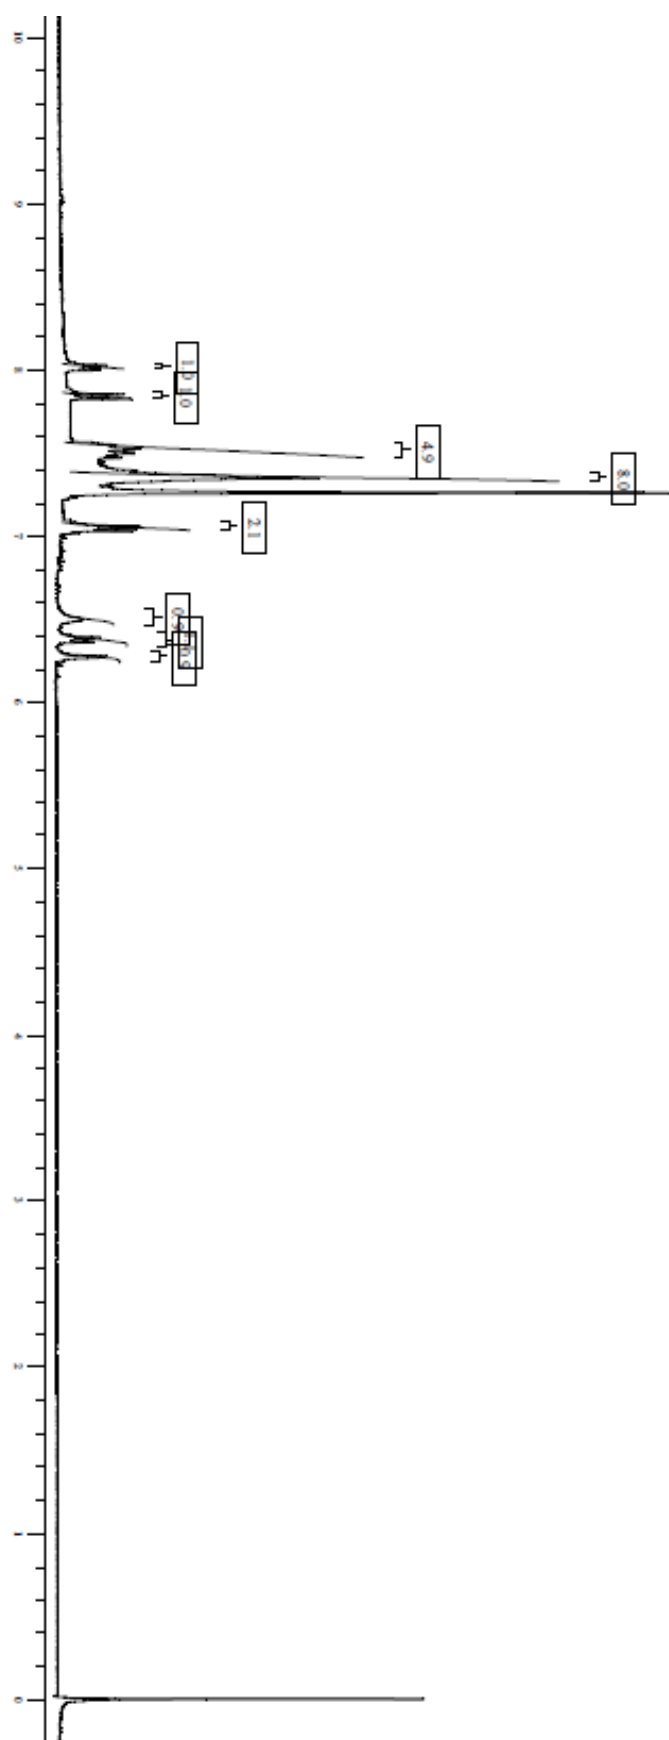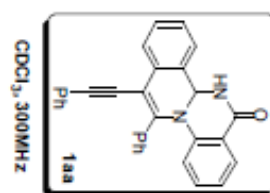

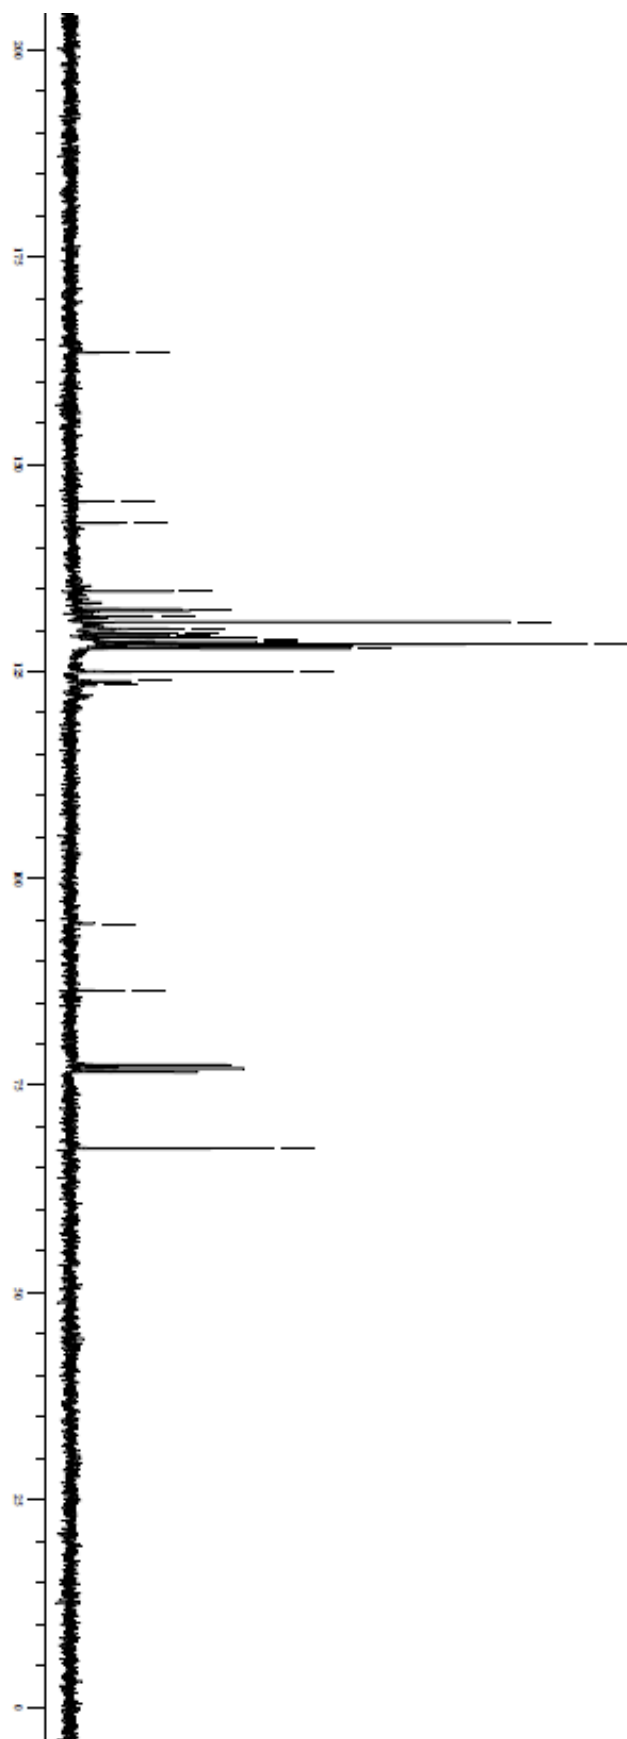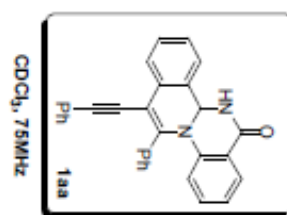

- 163.347
- 145.402
- 142.812
- 134.550
- 132.398
- 132.190
- 131.464
- 130.827
- 130.007
- 129.451
- 129.137
- 128.905
- 128.352
- 128.179
- 127.624
- 124.832
- 123.669
- 123.253
- 94.459
- 86.374
- 67.347

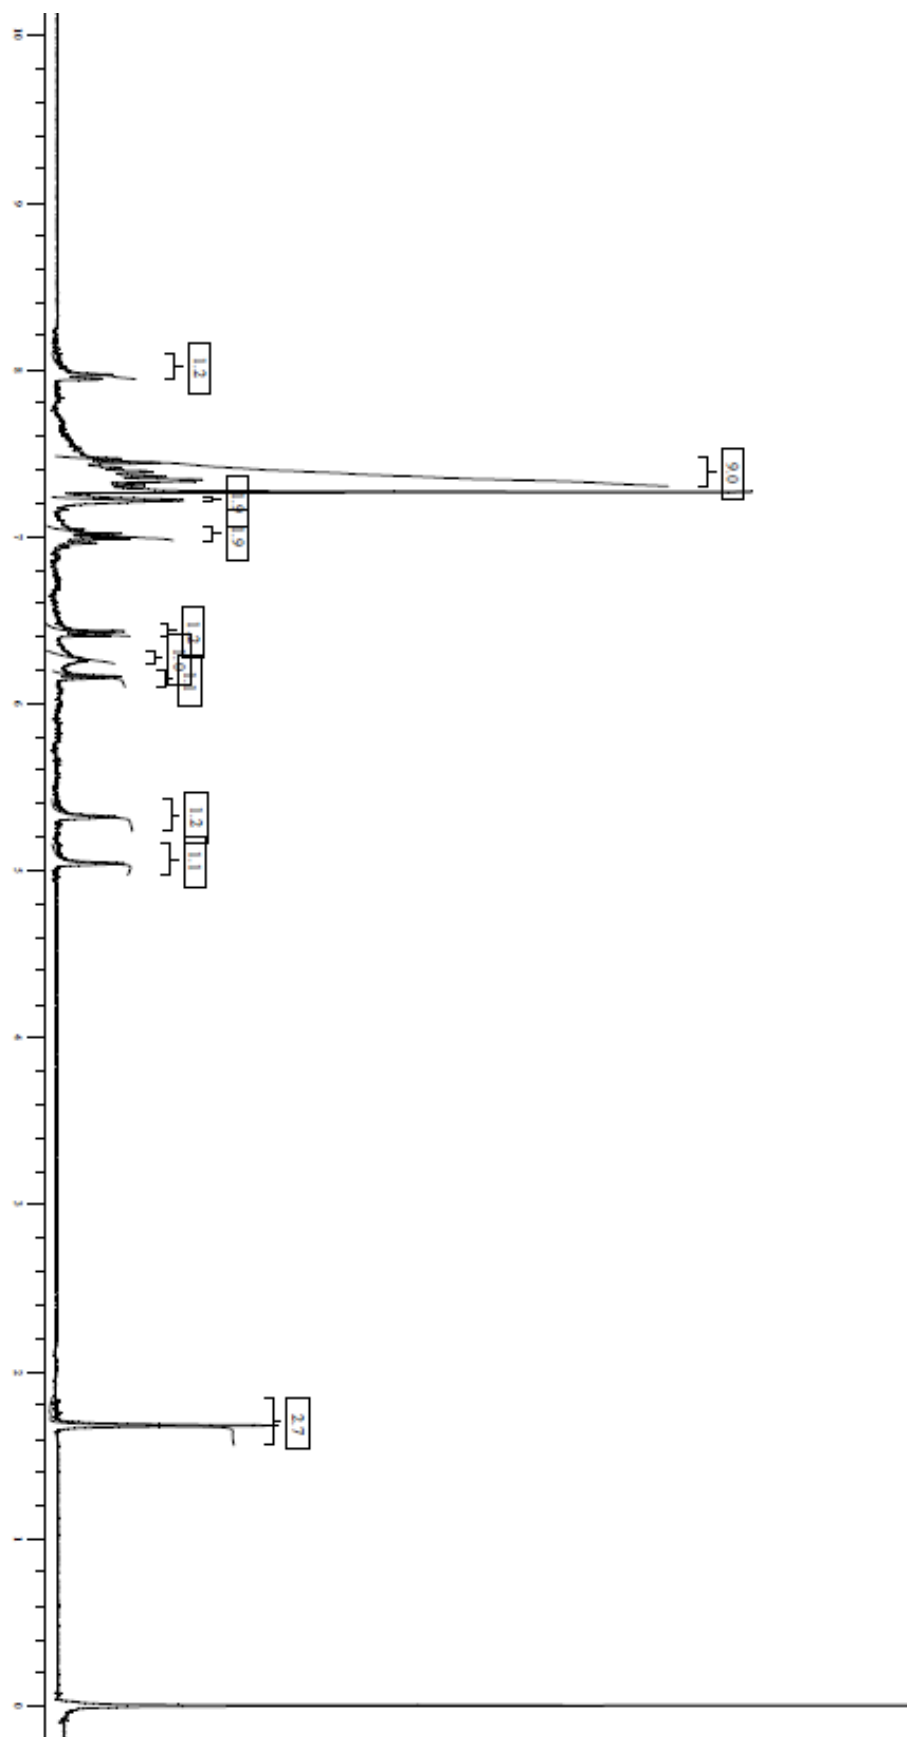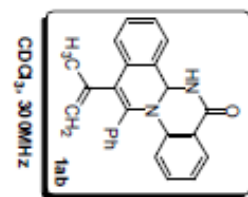



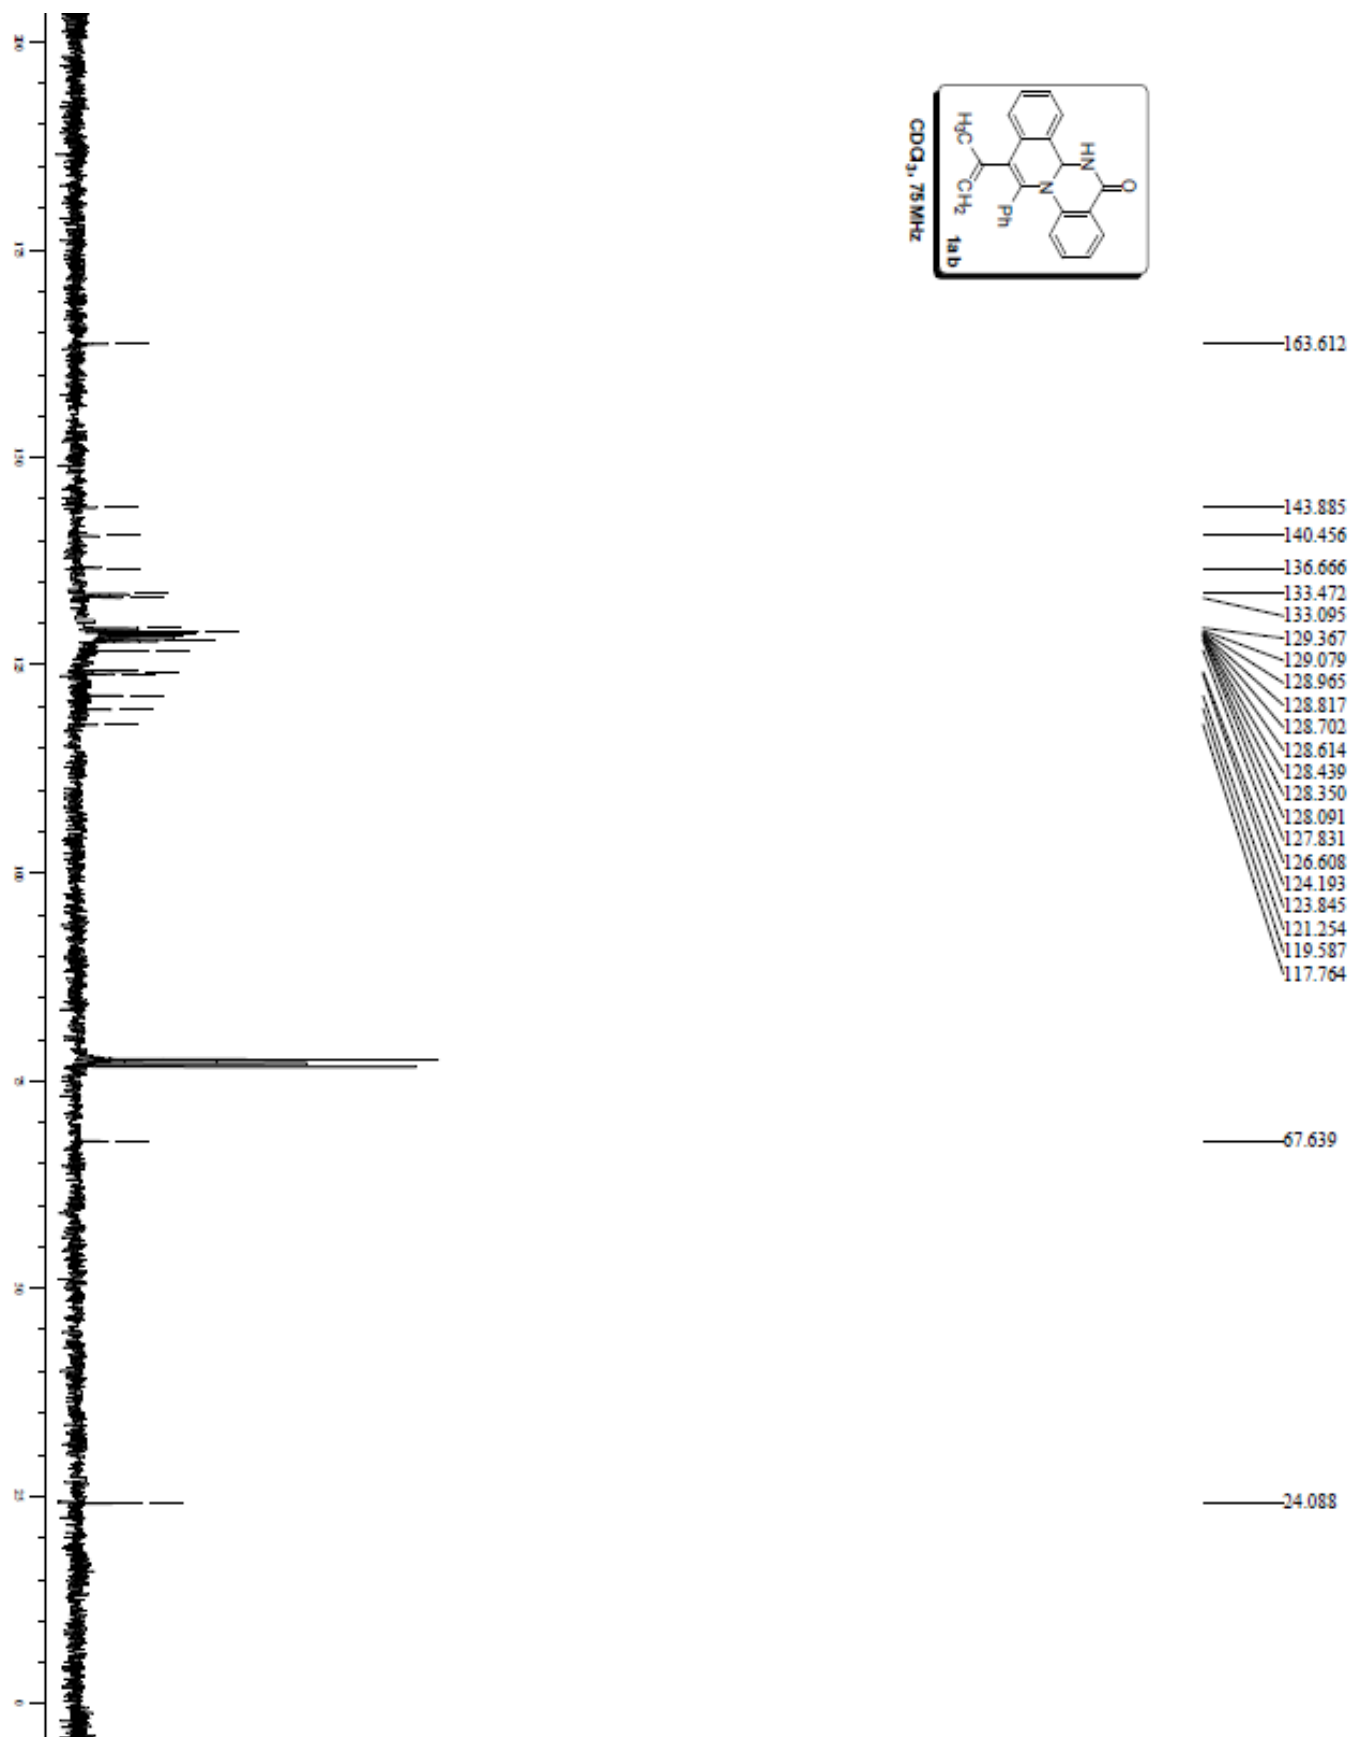

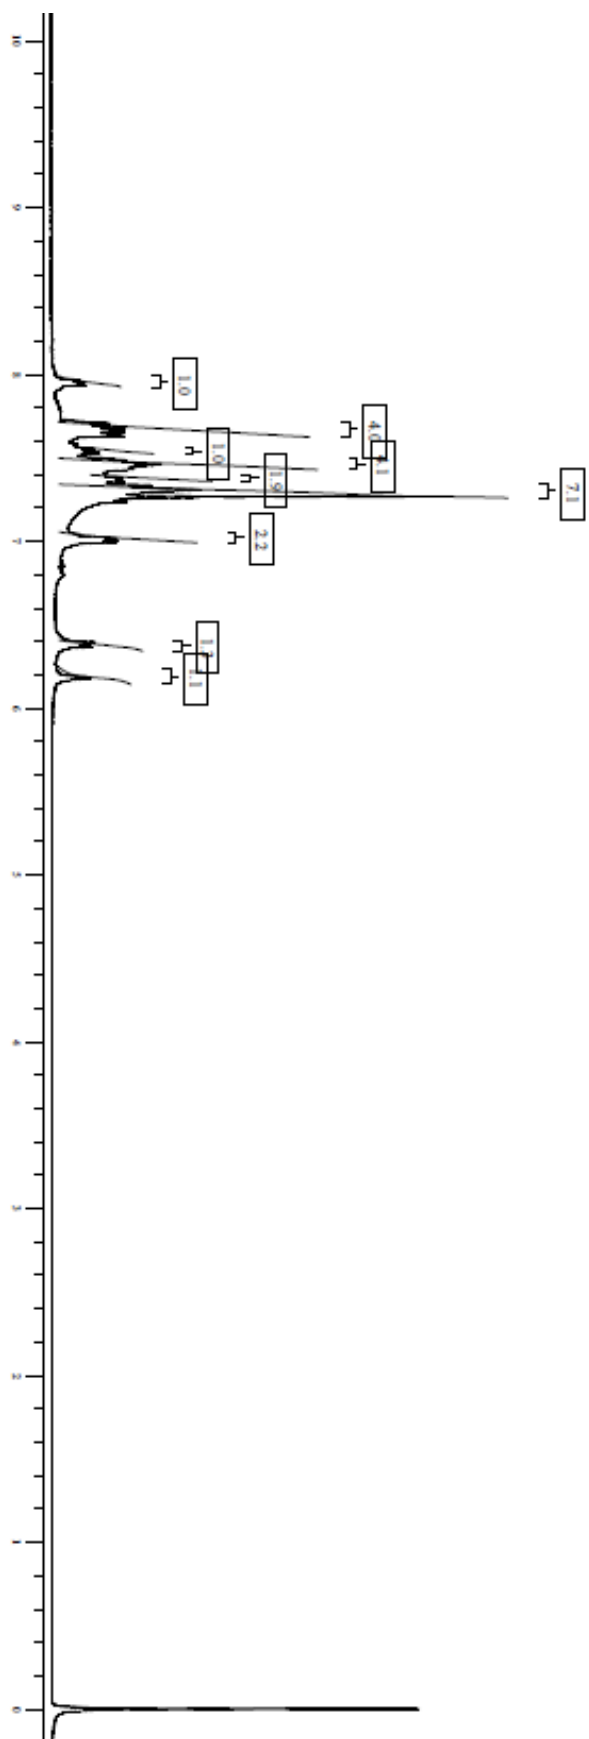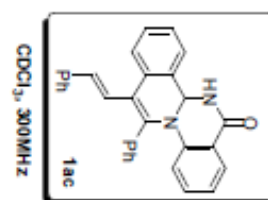

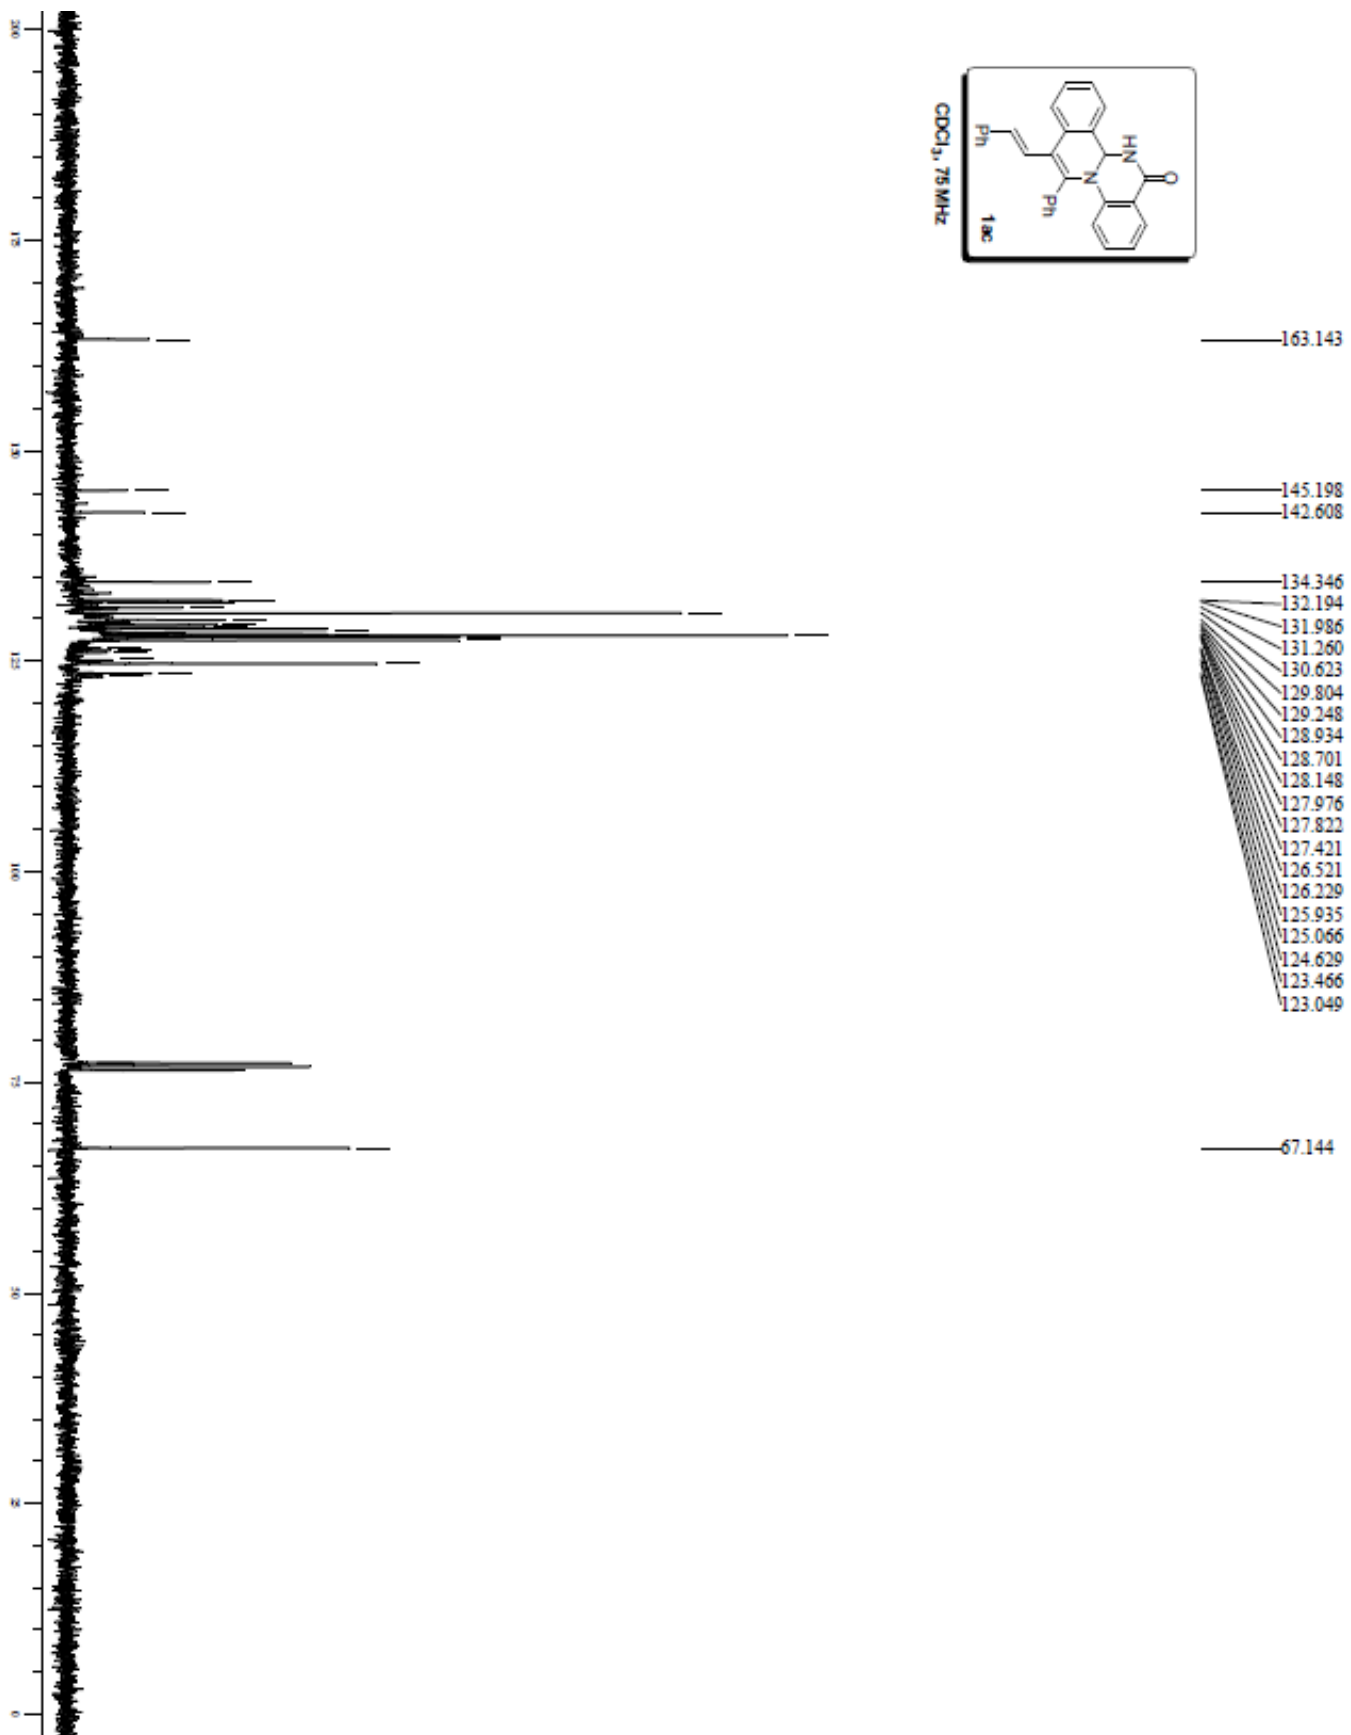

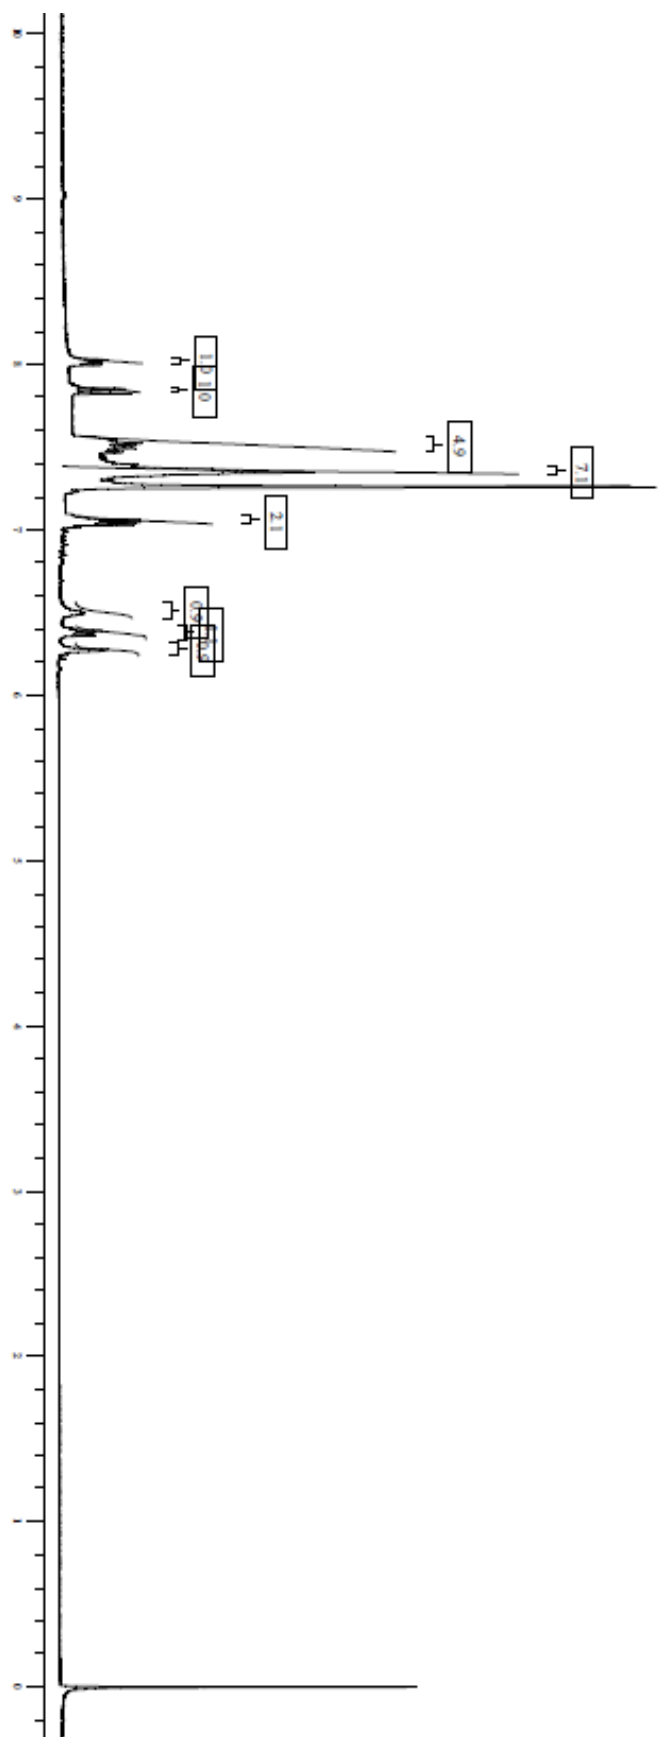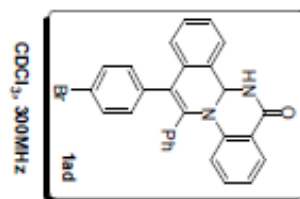

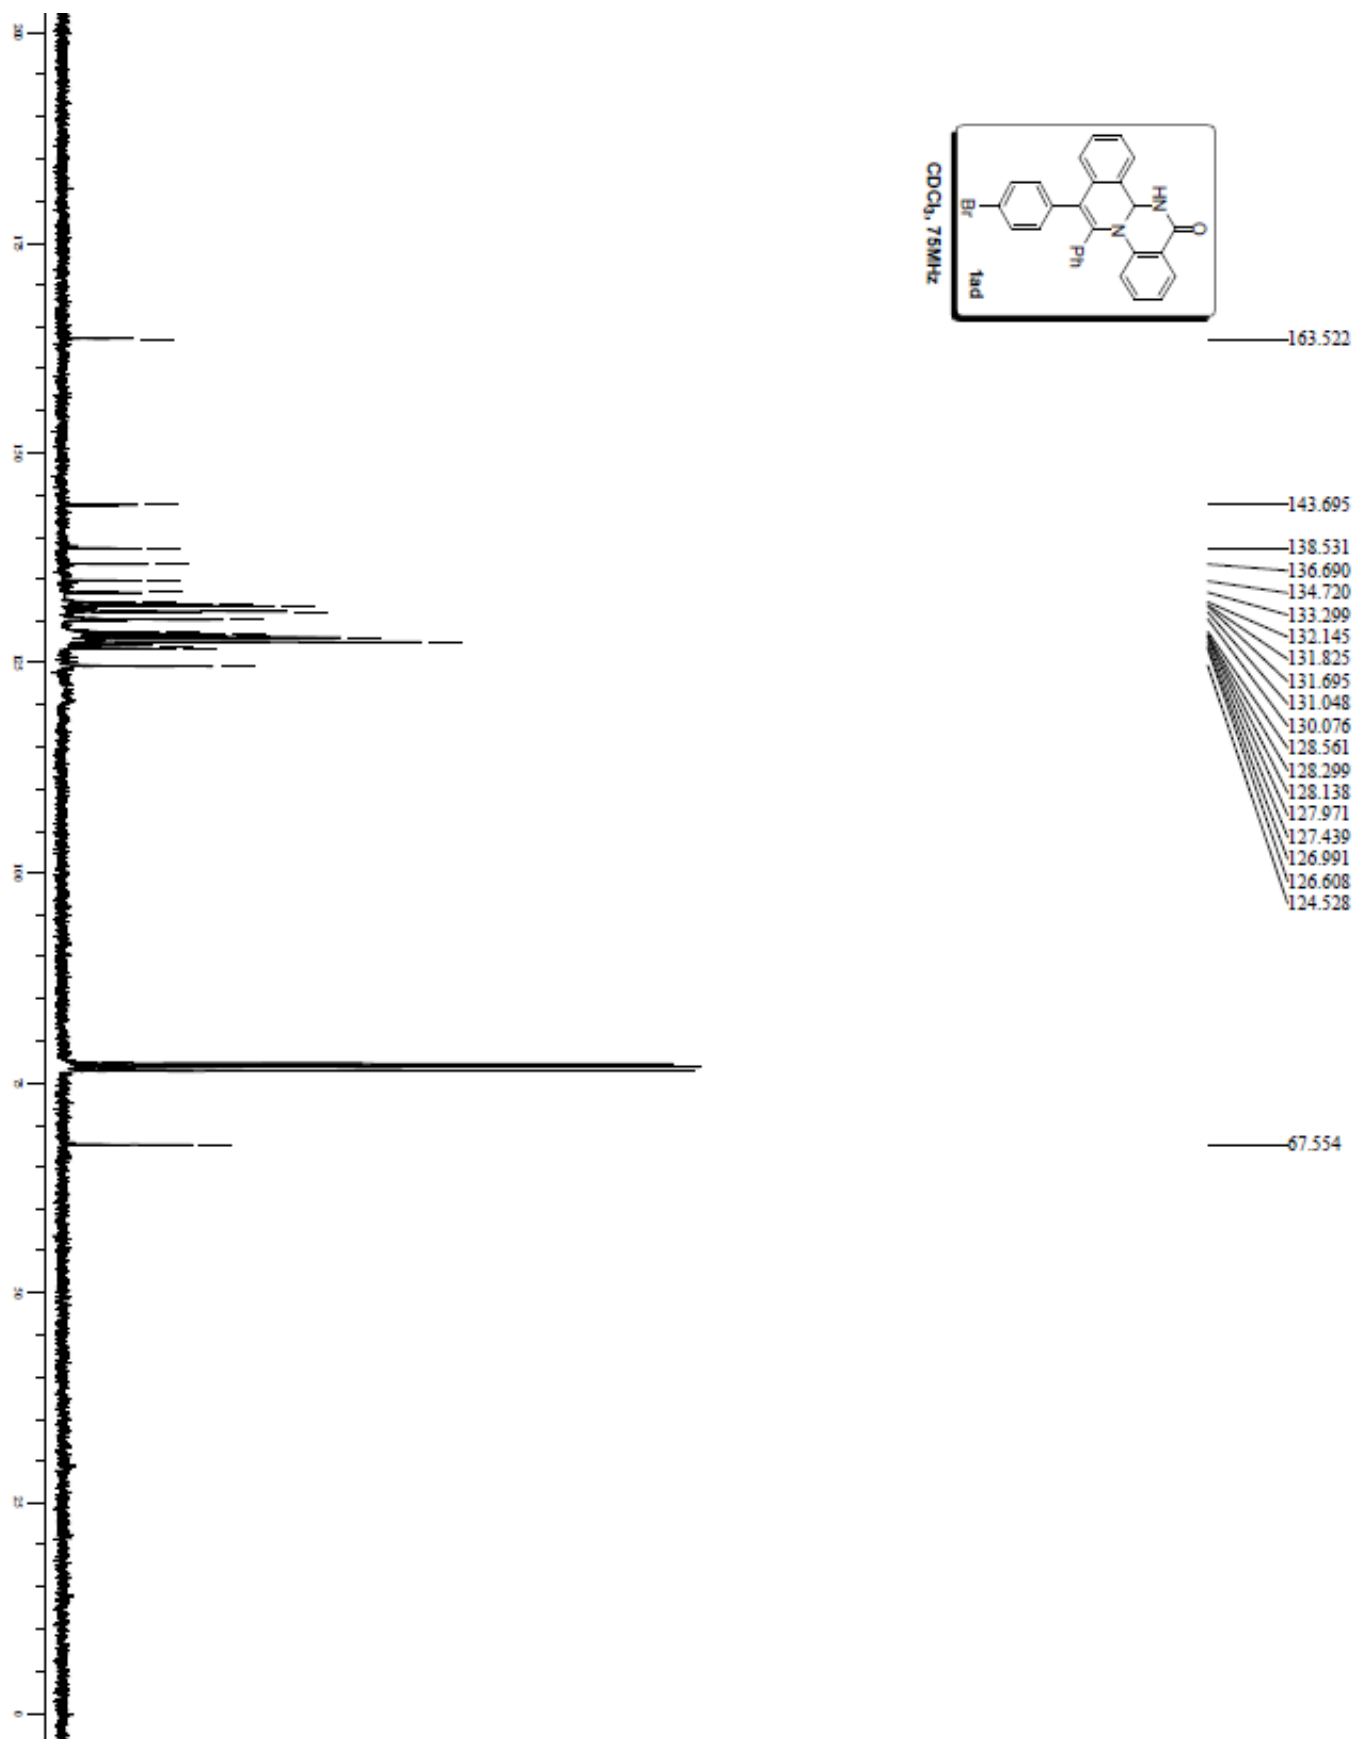

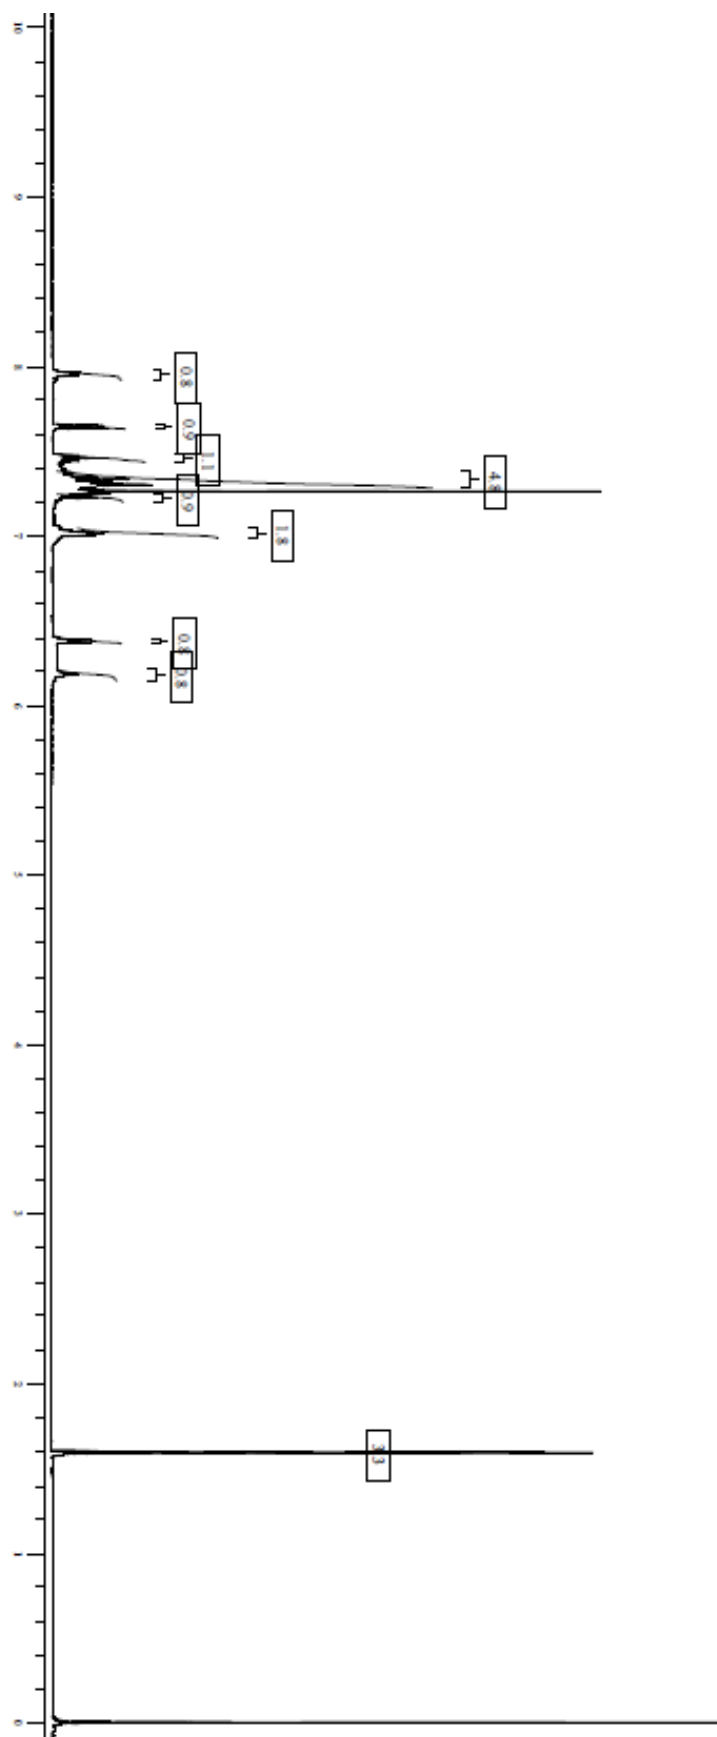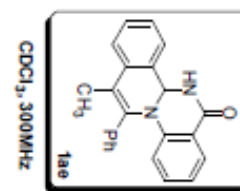

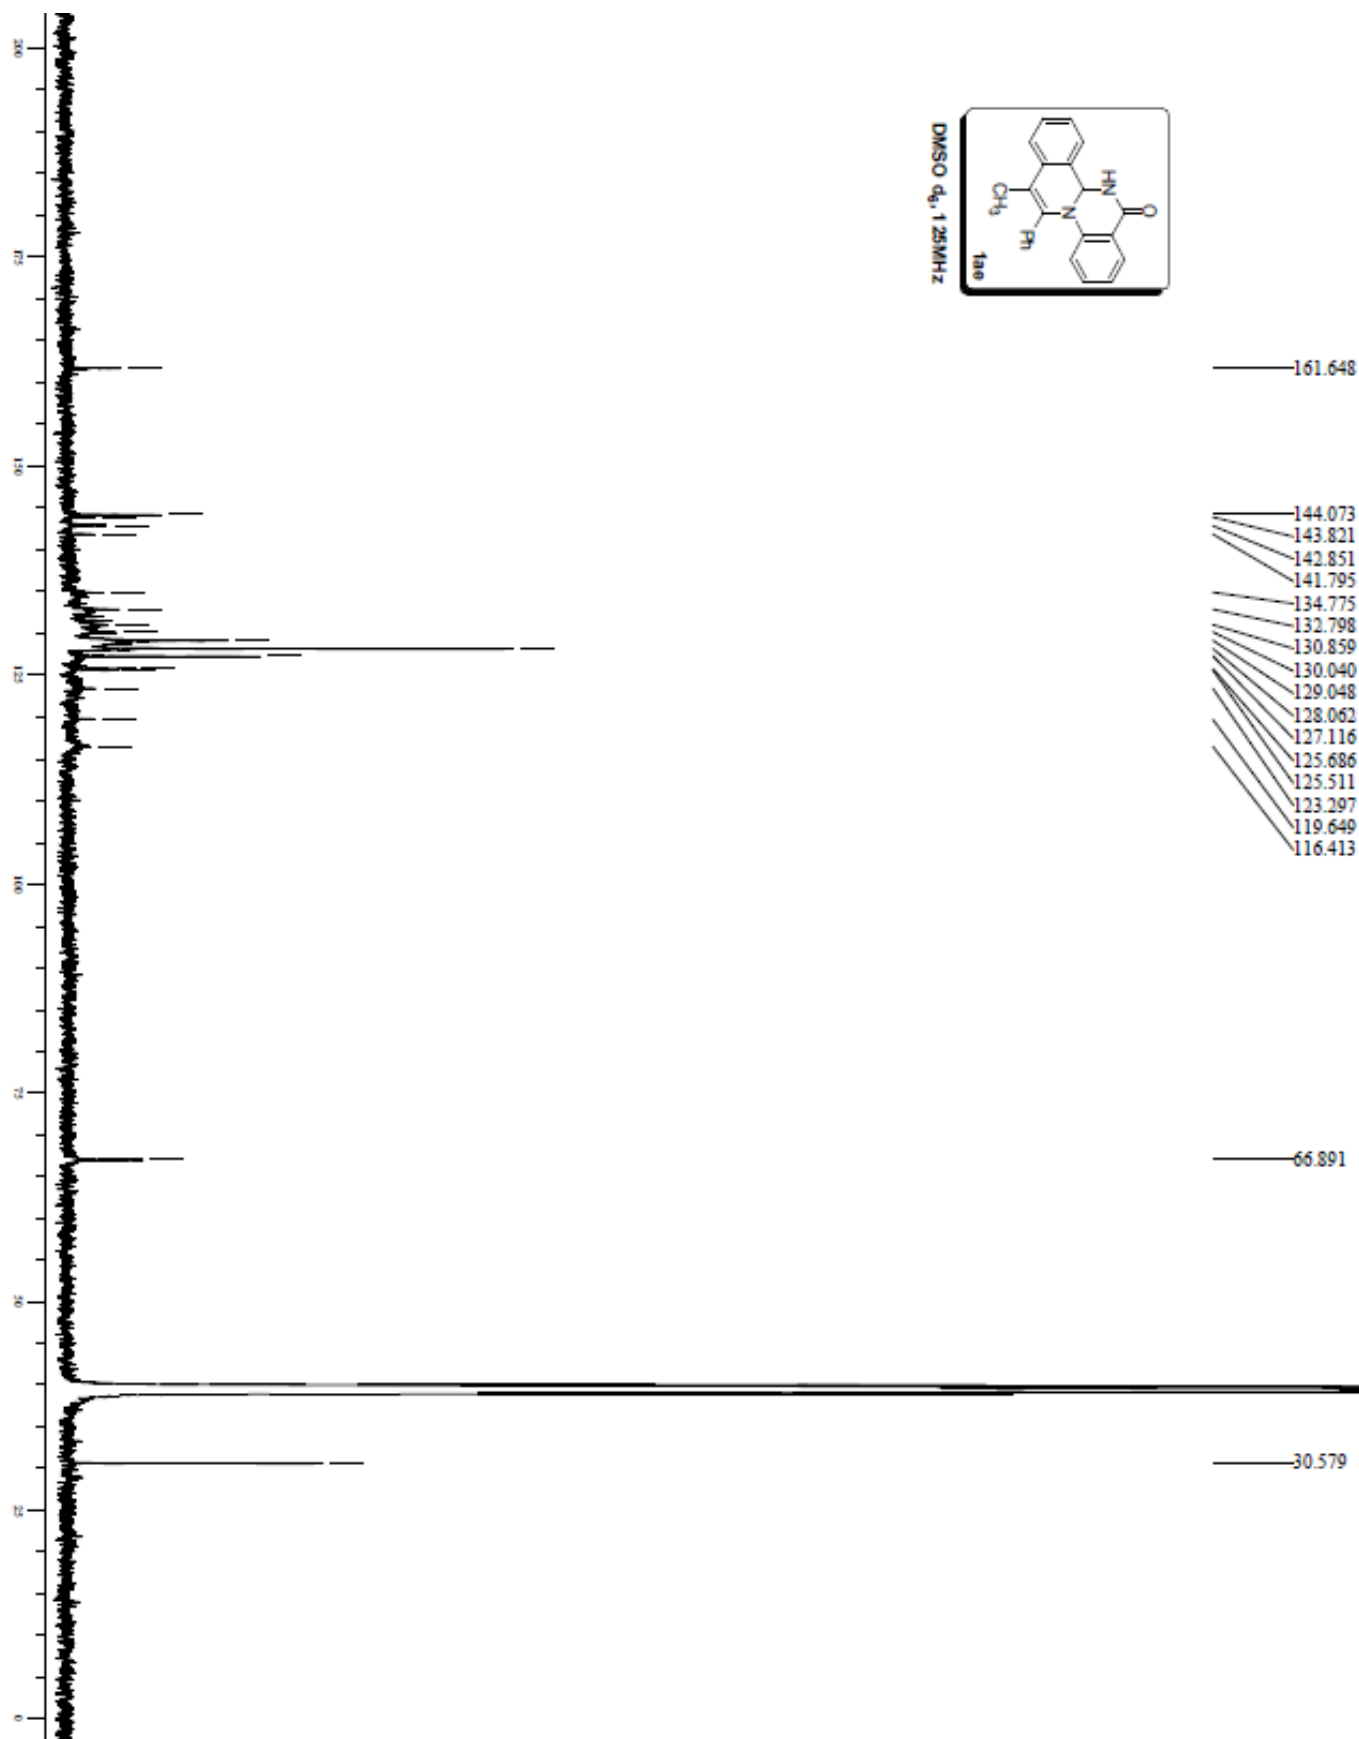

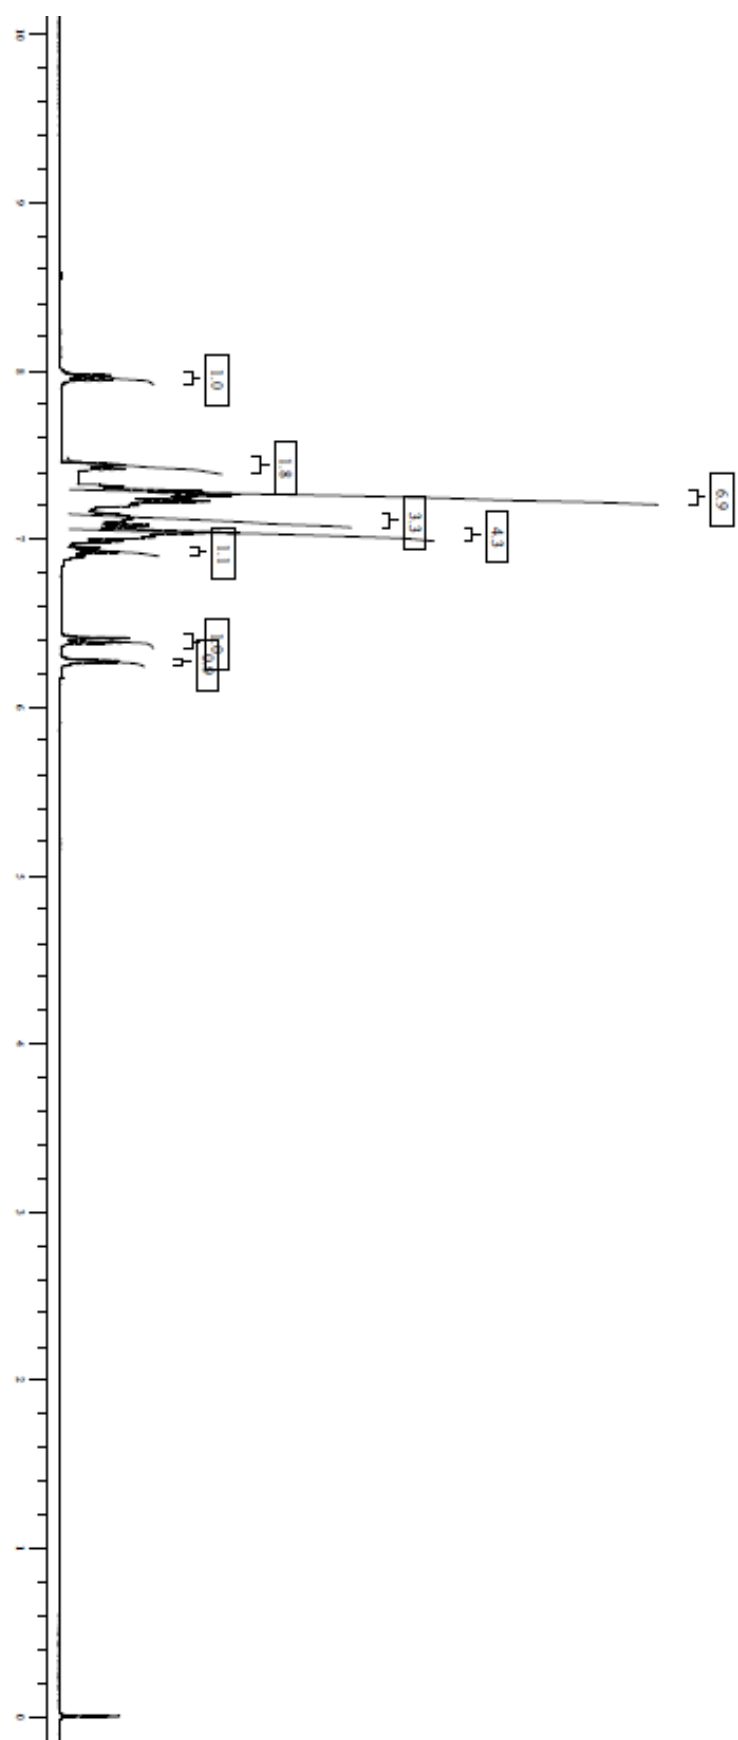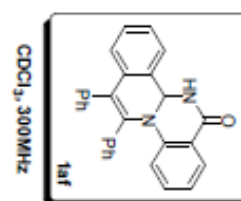



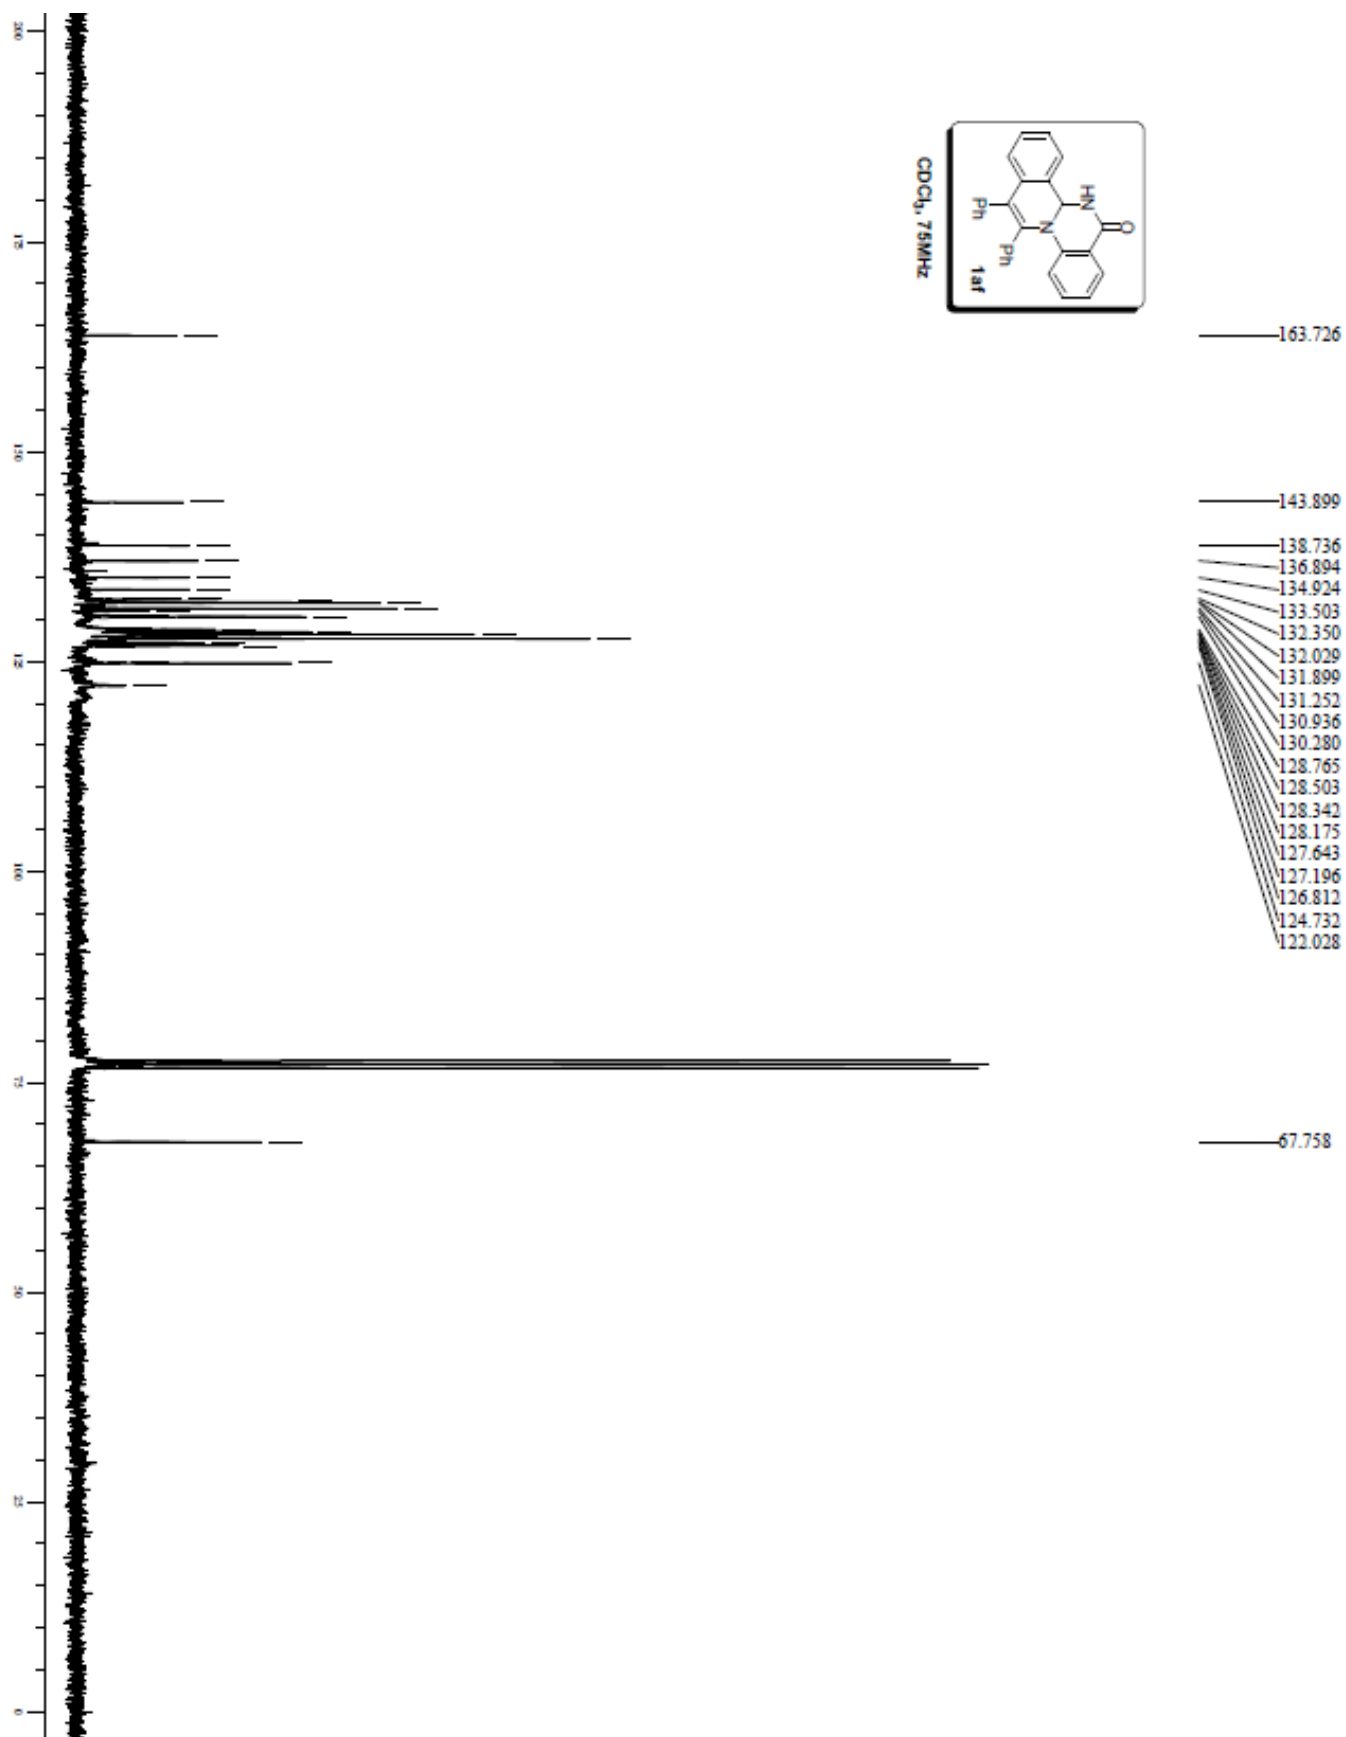

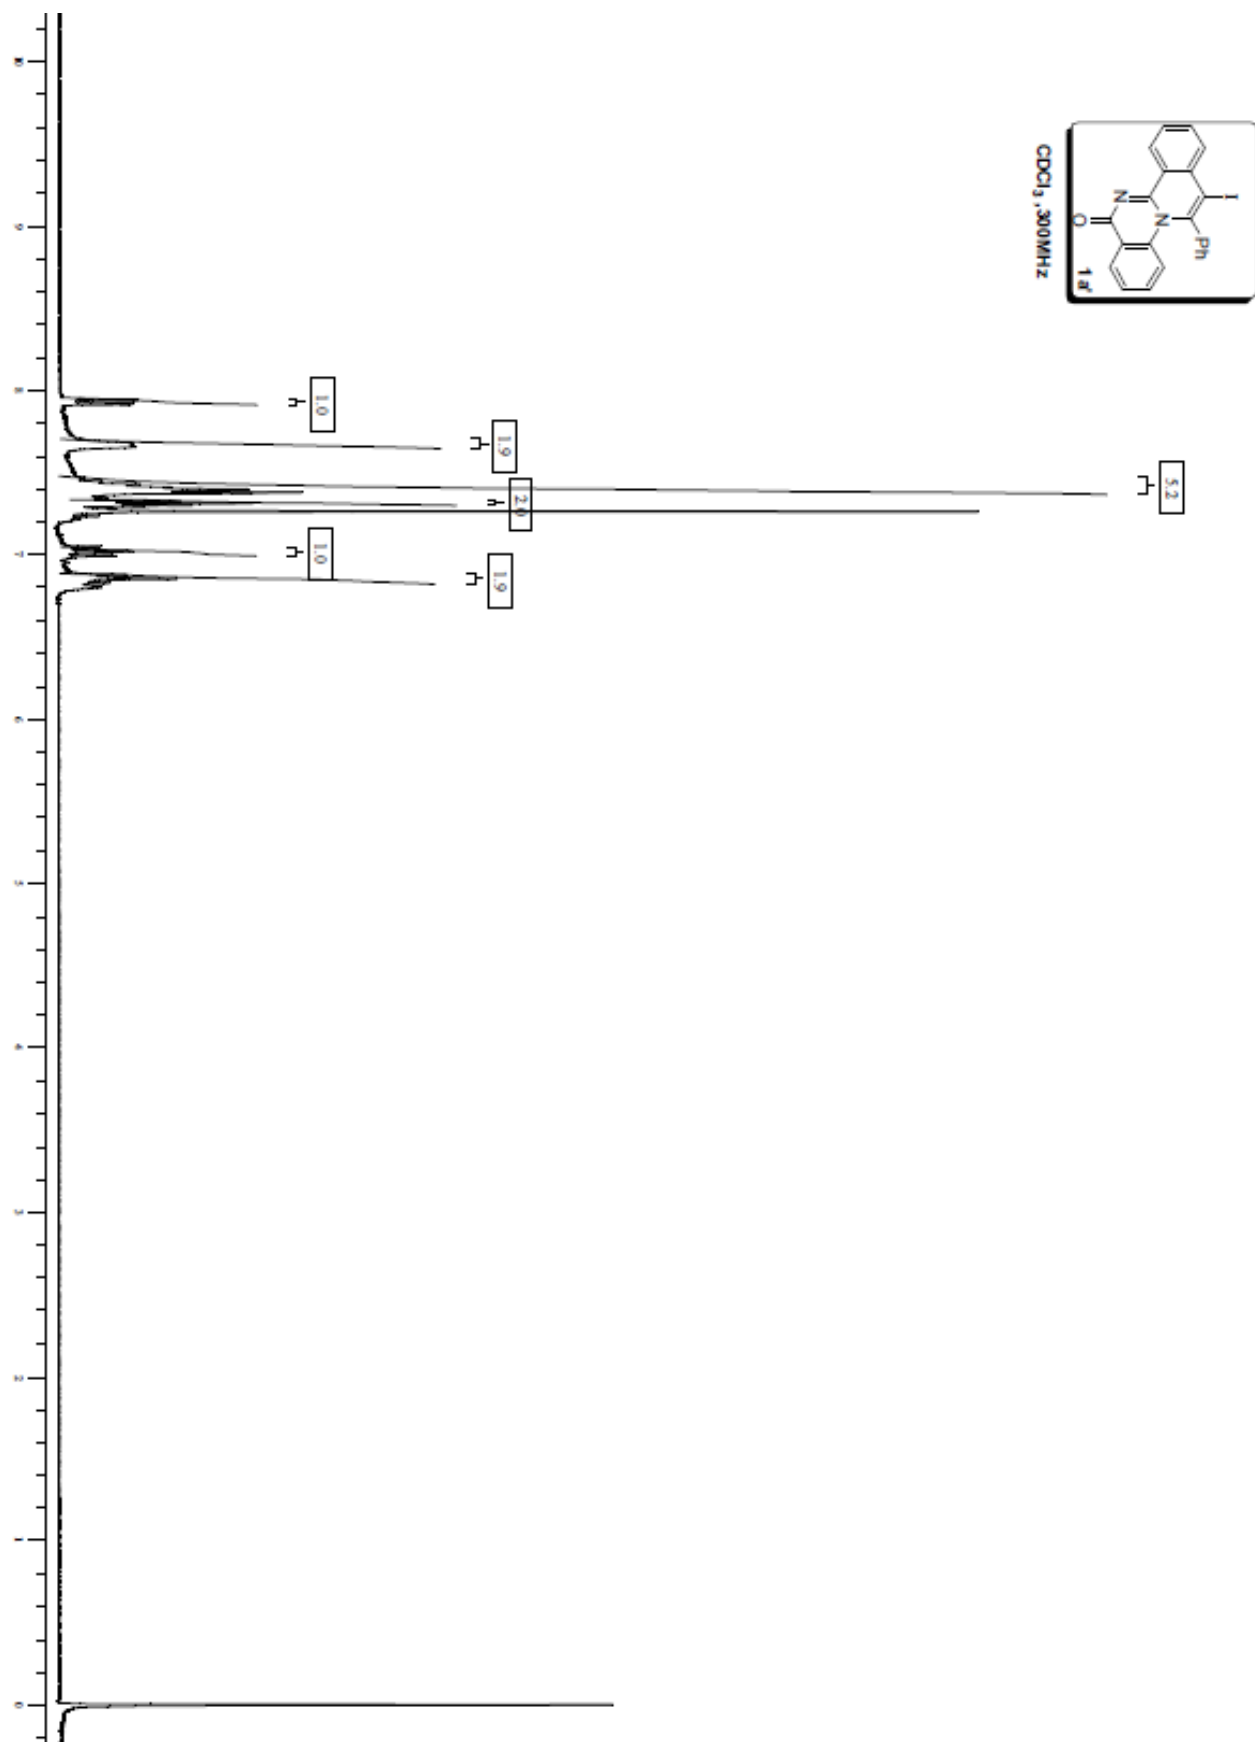

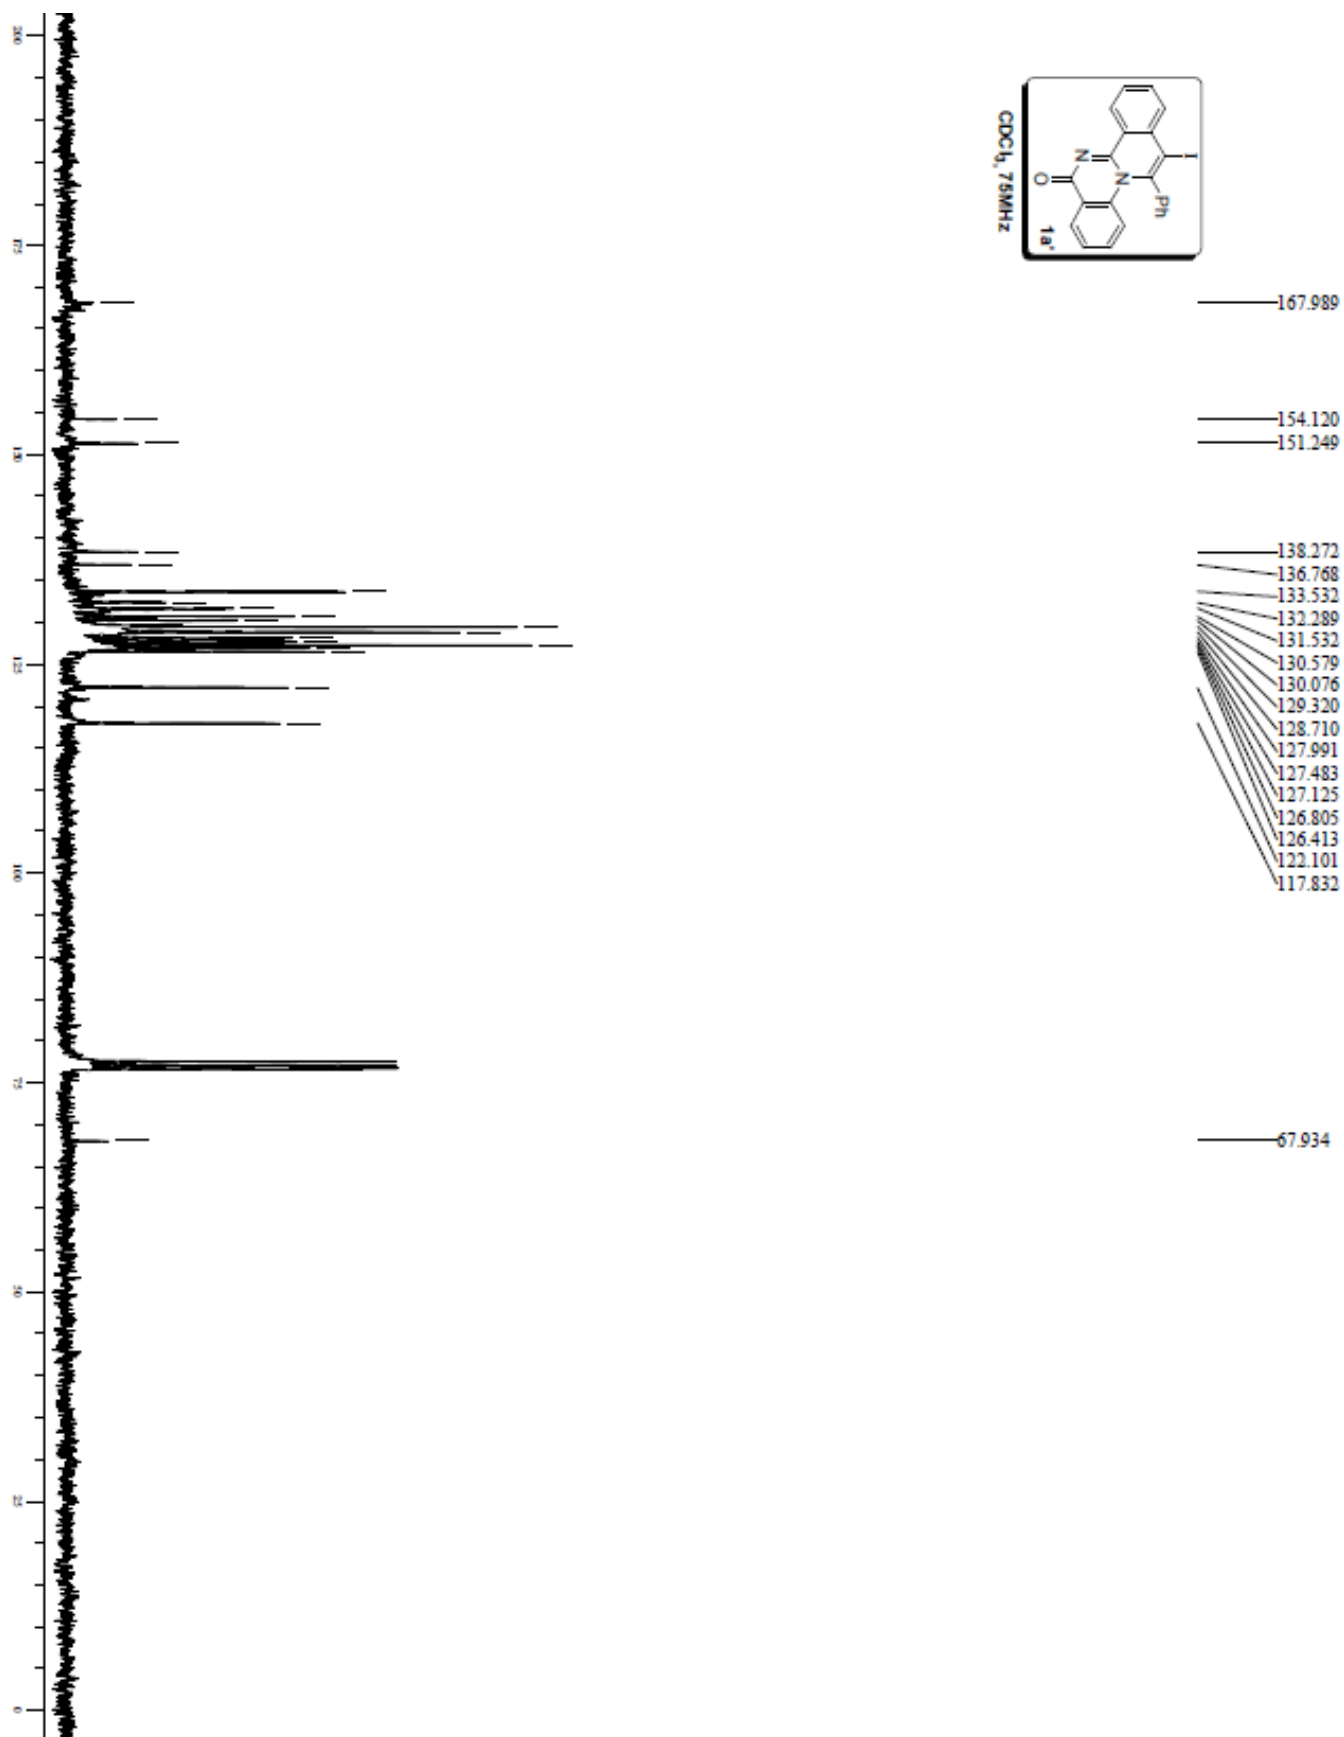

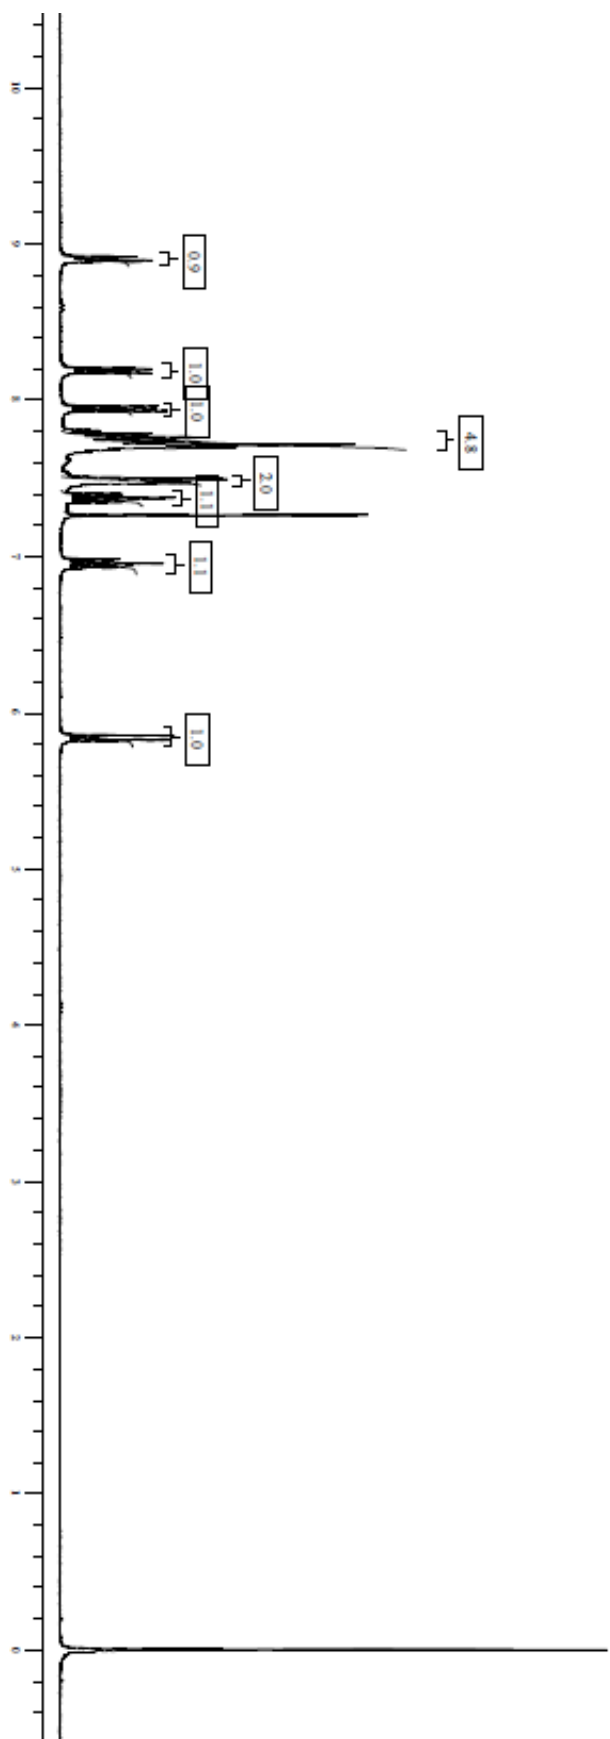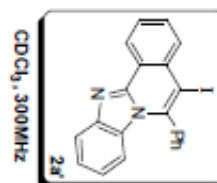

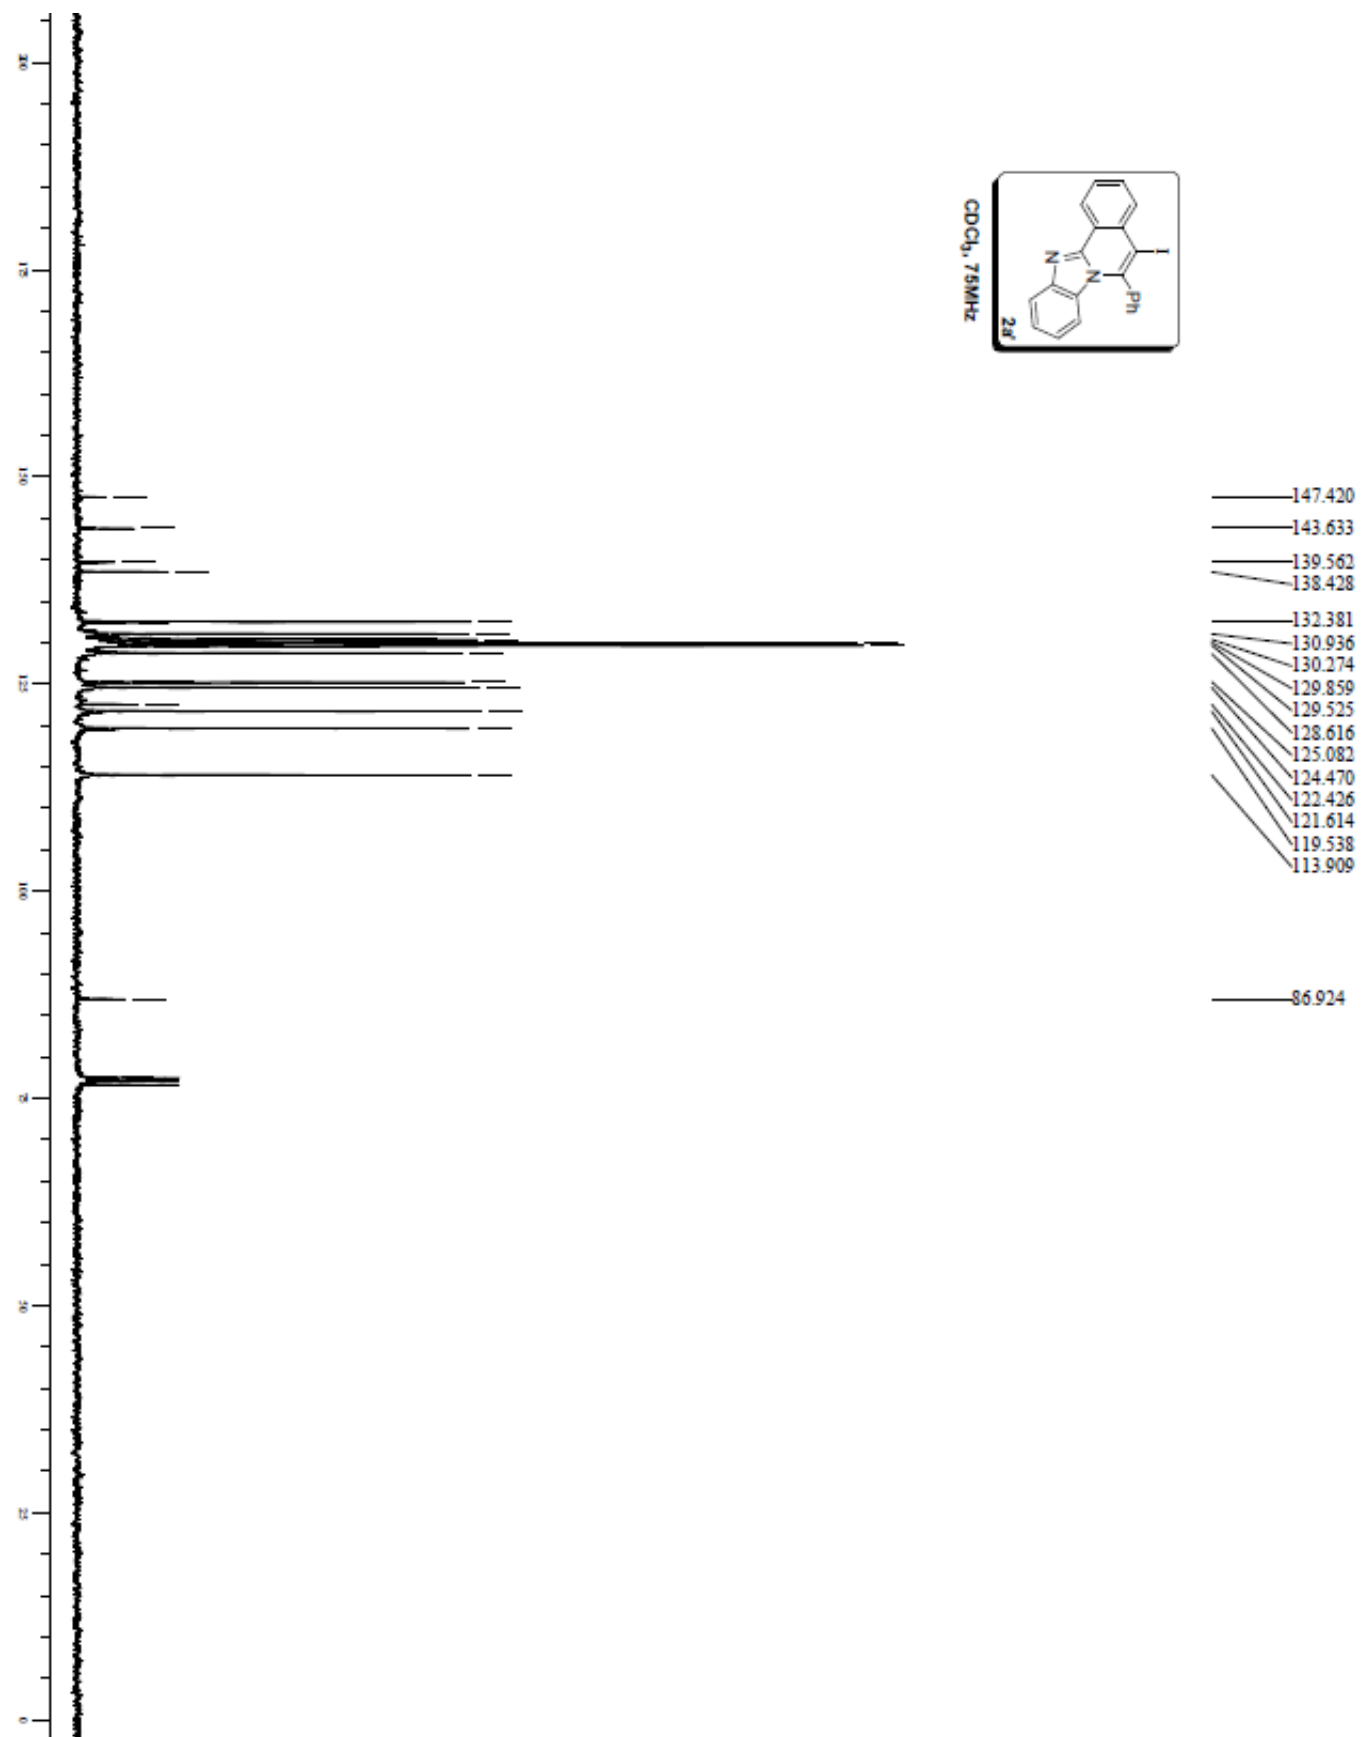

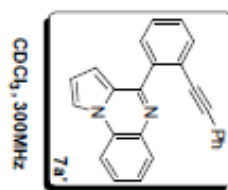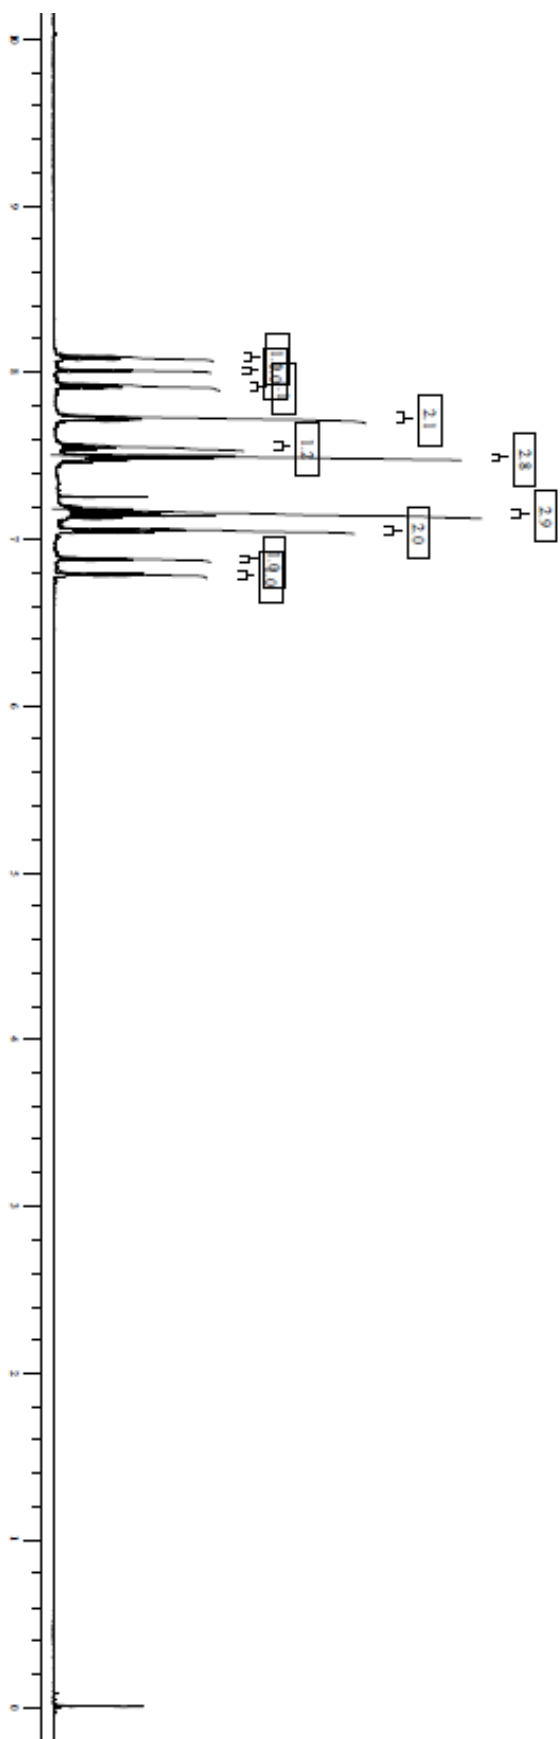

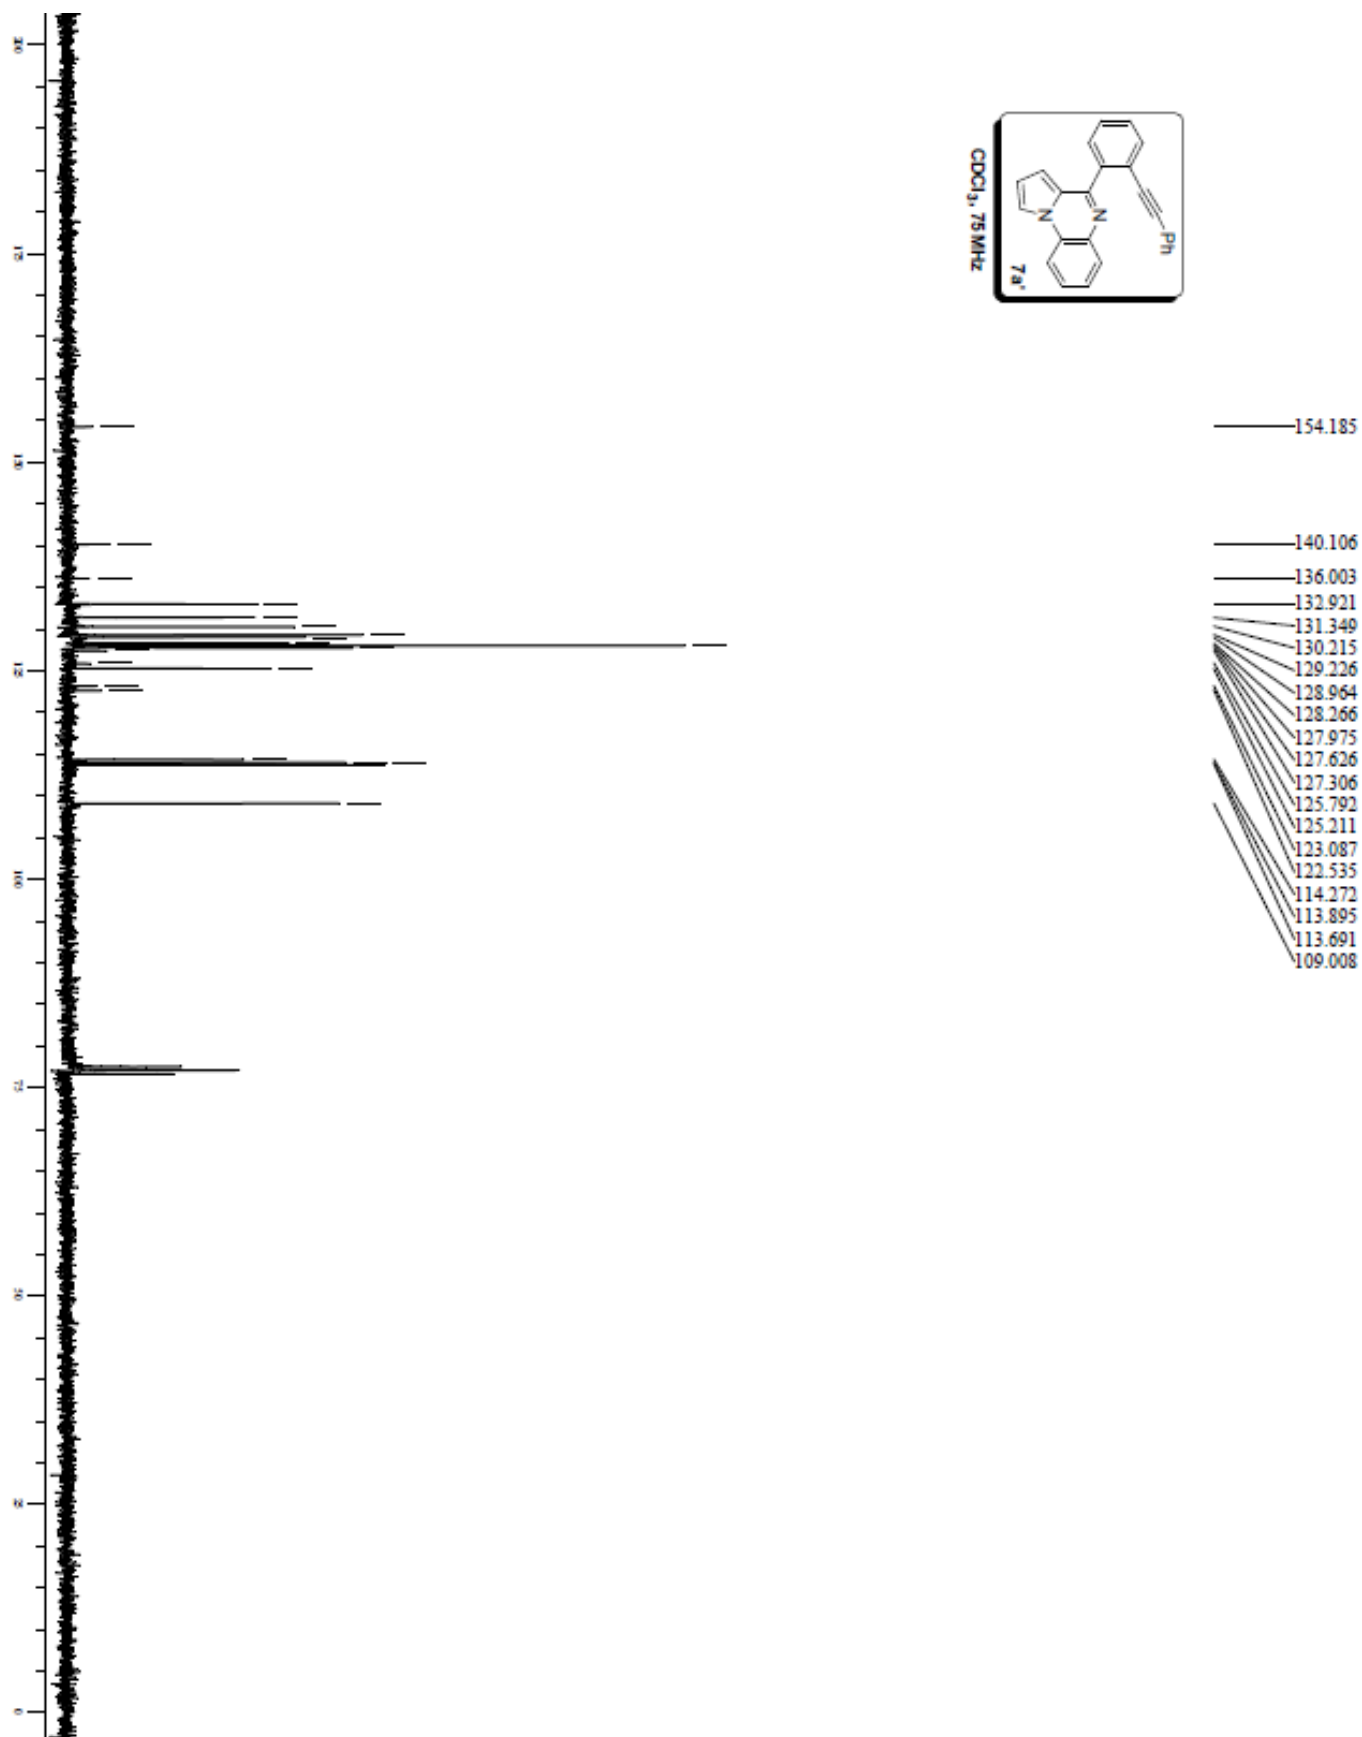

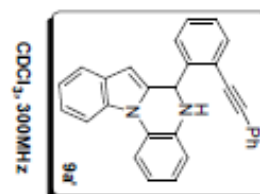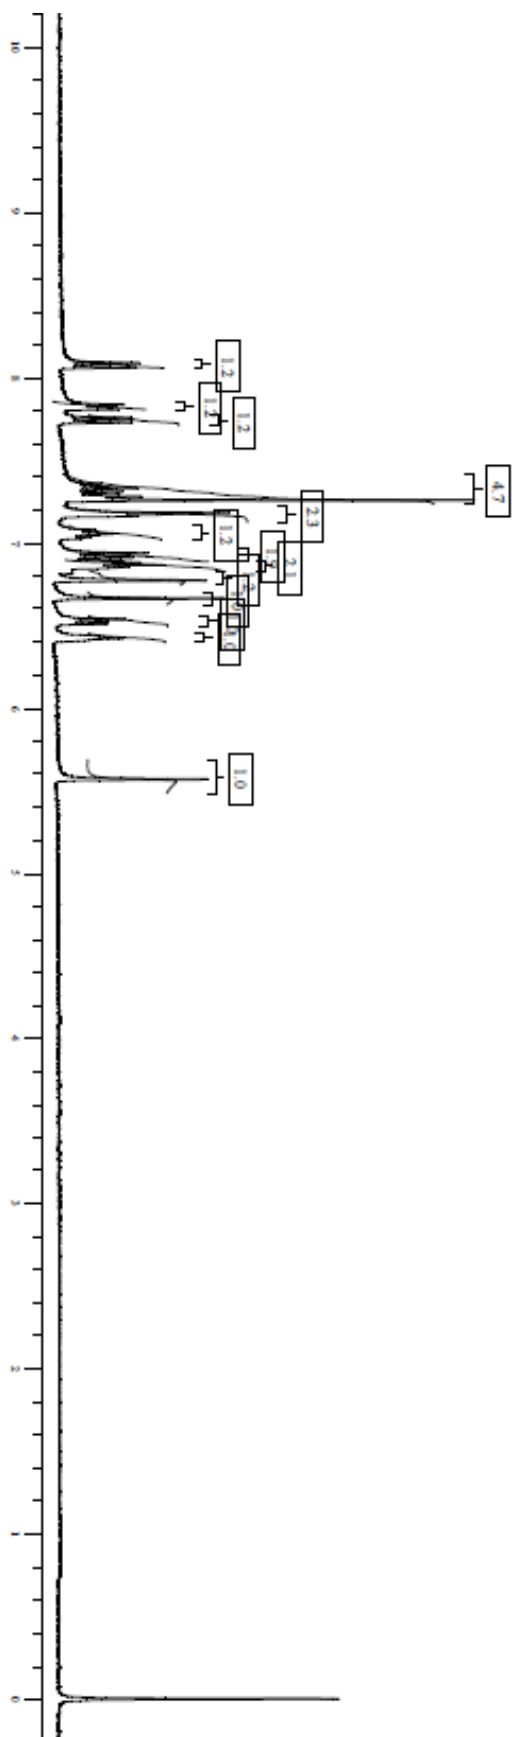



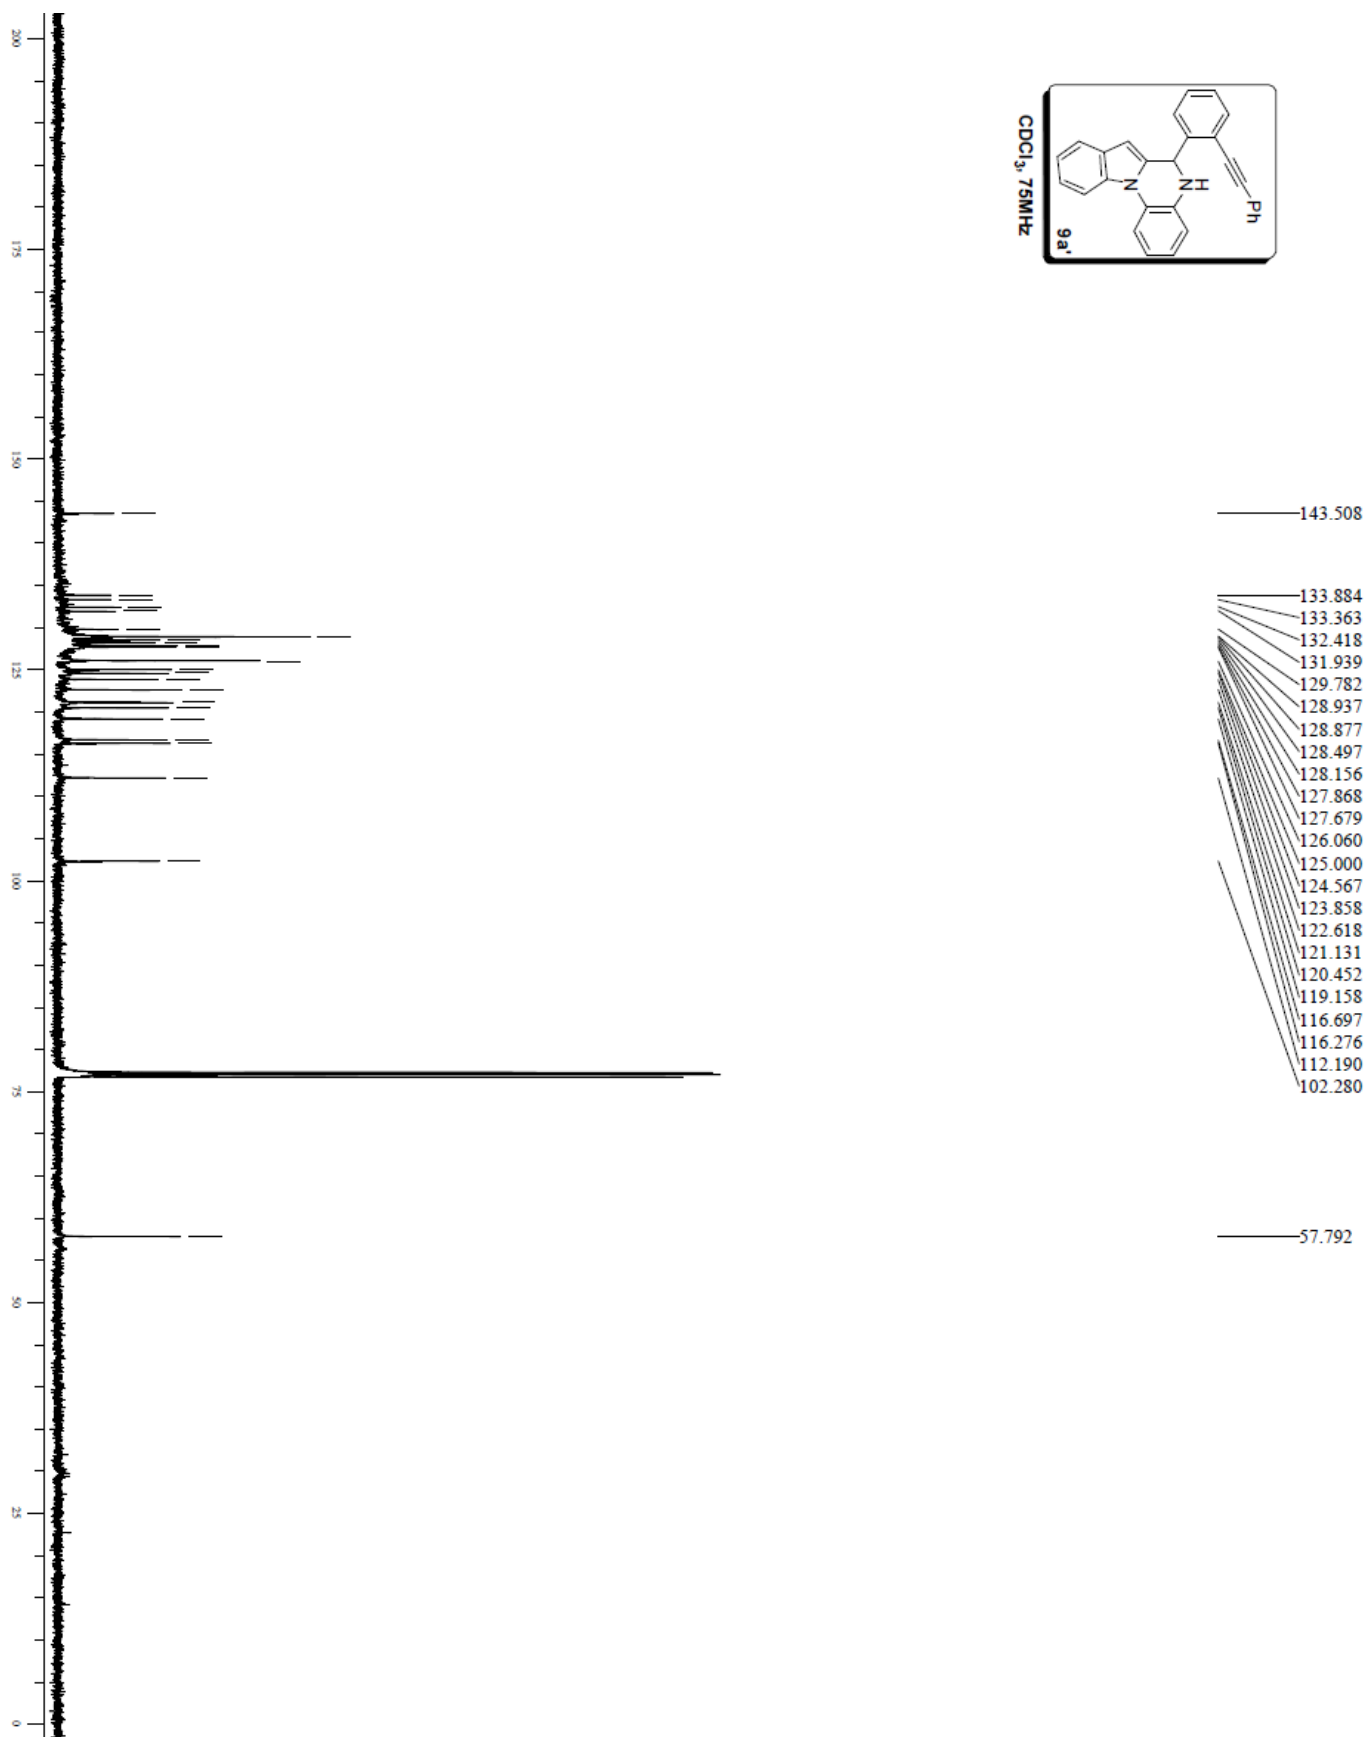

Supplement: c3cc45289a.pdf [file c3cc45289a.pdf]
